# Supplementary material for: Analysis of Corynebacterium silvaticum genomes from Portugal reveals a single cluster and a clade suggested to produce diphtheria toxin
Source: PeerJ. 2023 Mar 9;11:e14895. doi: 10.7717/peerj.14895 (PMC10008321; doi:10.7717/peerj.14895)
Supplement: Supplemental Information 5 [file peerj-11-14895-s005.xlsx]

## Sheet: Prophages
PO25/5
Total: 4 prophage regions have been identified, of which 0 regions are intact, 2 regions are incomplete, and 2 regions are questionable.
Region	Region Length	Completeness	Score	# Total Proteins	Region Position	Most Common Phage	GC %
1	38Kb	questionable	80	41	168001-206075	PHAGE_Gordon_Nyceirae_NC_031004(10)	0.5271
2	59.8Kb	questionable	70	49	695799-755648	PHAGE_Coryne_Lederberg_NC_048790(6)	0.5759
3	19Kb	incomplete	40	30	1609464-1628515	PHAGE_Coryne_Lederberg_NC_048790(6)	0.5867
4	17.7Kb	incomplete	10	21	2121747-2139530	PHAGE_Coryne_Lederberg_NC_048790(4)	0.5481
Region 1, total 43 CDS
#	CDS Position	BLAST Hit	E-Value
1	168001..168049	attL	0
2	168285..168659	PHAGE_Mycoba_Xavia_NC_051740: hypothetical protein; -; phage(gi100039)	2.26e-21
3	168643..168957	hypothetical protein; -	0
4	complement(169098..169916)	PHAGE_Coryne_Poushou_NC_042139: endolysin; -; phage(gi100033)	1.31e-93
5	complement(169913..170323)	PHAGE_Coryne_Poushou_NC_042139: endolysin; -; phage(gi100033)	4.68e-09
6	complement(170445..170675)	PHAGE_Rhodoc_REQ2_NC_016652: hypothetical protein; -; phage(gi372449852)	1.27e-18
7	complement(170678..170947)	hypothetical protein; -	0
8	complement(171042..171449)	PHAGE_Coryne_Poushou_NC_042139: hypothetical protein; -; phage(gi100035)	9.88e-64
9	complement(171459..171950)	PHAGE_Coryne_Poushou_NC_042139: hypothetical protein; -; phage(gi100036)	5.69e-21
10	172070..172309	Transcriptional regulator; -	0
11	172357..172824	hypothetical protein; -	0
12	172894..173400	hypothetical protein; -	0
13	complement(173436..174338)	hypothetical protein; -	0
14	174396..174623	hypothetical protein; -	0
15	174639..175652	PHAGE_Mycoba_Willsammy_NC_051727: holin; -; phage(gi100034)	7.44e-61
16	175733..176491	PHAGE_Coryne_Poushou_NC_042139: recombination protein; -; phage(gi100049)	4.96e-25
17	176488..176904	PHAGE_Coryne_Poushou_NC_042139: putative single-stranded DNA binding protein; -; phage(gi100050)	8.96e-22
18	176932..177753	PHAGE_Coryne_Poushou_NC_042139: tail fiber protein; -; phage(gi100052)	3.54e-108
19	177875..178450	PHAGE_Coryne_Poushou_NC_042139: tail assembly protein; -; phage(gi100053)	2.38e-24
20	178555..178950	hypothetical protein; -	0
21	179075..179554	PHAGE_Gordon_Nyceirae_NC_031004: hypothetical protein; -; phage(gi100004)	5.21e-29
22	179538..180608	PHAGE_Gordon_Nyceirae_NC_031004: hypothetical protein; -; phage(gi100005)	1.75e-138
23	180583..181194	PHAGE_Gordon_Nyceirae_NC_031004: hypothetical protein; -; phage(gi100006)	1.96e-72
24	181194..181370	hypothetical protein; -	0
25	181413..182138	PHAGE_Rhodoc_Hiro_NC_048669: hypothetical protein; -; phage(gi100009)	3.56e-34
26	182135..182521	PHAGE_Mycoba_20ES_NC_023597: portal protein; -; phage(gi589892623)	1.82e-11
27	182540..184240	PHAGE_Gordon_Nyceirae_NC_031004: hypothetical protein; -; phage(gi100008)	1.84e-42
28	184237..184539	hypothetical protein; -	0
29	184616..185236	PHAGE_Mycoba_Benedict_NC_042331: hypothetical protein; -; phage(gi100012)	7.61e-05
30	185248..186237	PHAGE_Gordon_GMA1_NC_030902: hypothetical protein; -; phage(gi100006)	4.47e-123
31	186249..186548	PHAGE_Strept_Picard_NC_047794: hypothetical protein; -; phage(gi100008)	3.16e-05
32	186561..187028	hypothetical protein; -	0
33	187332..187652	PHAGE_Gordon_Nyceirae_NC_031004: hypothetical protein; -; phage(gi100016)	4.94e-22
34	187661..188104	PHAGE_Gordon_Nyceirae_NC_031004: hypothetical protein; -; phage(gi100017)	2.82e-13
35	188122..188274	hypothetical protein; -	0
36	188334..188963	PHAGE_Gordon_Nyceirae_NC_031004: hypothetical protein; -; phage(gi100018)	6.49e-12
37	189059..189412	hypothetical protein; -	0
38	189451..189861	PHAGE_Gordon_Nyceirae_NC_031004: hypothetical protein; -; phage(gi100020)	5.13e-12
39	189890..191338	PHAGE_Gordon_BritBrat_NC_030942: hypothetical protein; -; phage(gi100018)	5.15e-72
40	191335..192660	PHAGE_Gordon_Terrapin_NC_031001: hypothetical protein; -; phage(gi100022)	2.54e-33
41	192660..193571	PHAGE_Gordon_Splinter_NC_030927: hypothetical protein; -; phage(gi100020)	5.68e-25
42	193599..194534	PHAGE_Gordon_Obliviate_NC_031237: hypothetical protein; -; phage(gi100016)	2.36e-09
43	206075..206123	attR	0
Region 2, total 51 CDS
#	CDS Position	BLAST Hit	E-Value
1	695799..695810	attL	0
2	702118..702261	PHAGE_Clostr_CDKM9_NC_048642: tail fiber protein; -; phage(gi100052)	4.55e-09
3	702456..703049	hypothetical phage-associated protein; -	0
4	703151..703405	hypothetical protein; -	0
5	703402..703812	PHAGE_Coryne_Stiles_NC_048789: hypothetical protein; -; phage(gi100042)	3.31e-08
6	703805..704947	PHAGE_Coryne_SamW_NC_048069: DNA adenine methyltransferase; -; phage(gi100041)	1.1e-143
7	704953..705498	PHAGE_Coryne_SamW_NC_048069: hypothetical protein; -; phage(gi100042)	3.61e-72
8	705511..705708	hypothetical protein; -	0
9	705785..707752	PHAGE_Coryne_StAB_NC_048780: HNH endonuclease; -; phage(gi100046)	0
10	complement(707763..708587)	hypothetical protein; -	0
11	708846..709610	PHAGE_Staphy_37_NC_007055: ORF016; -; phage(gi66395745)	9.71e-52
12	709607..710050	PHAGE_Faecal_FP_Lagaffe_NC_047911: hypothetical protein; -; phage(gi100051)	1.1e-21
13	710047..712308	PHAGE_Lactob_T25_NC_048625: hypothetical protein; -; phage(gi100020)	2.37e-55
14	712451..712729	PHAGE_Coryne_Lederberg_NC_048790: DNA helicase; -; phage(gi100044)	4.45e-19
15	712710..714086	PHAGE_Coryne_Stiles_NC_048789: putative single-stranded DNA binding protein; -; phage(gi100050)	0
16	714074..714538	hypothetical phage-associated protein; -	0
17	complement(714621..715004)	hypothetical protein; -	0
18	715034..715177	hypothetical protein; -	0
19	715348..715923	Phage terminase, small subunit; -	0
20	716005..717189	PHAGE_Faecal_FP_Brigit_NC_047909: hypothetical protein; -; phage(gi100017)	9.31e-98
21	717161..718411	PHAGE_Faecal_FP_Epona_NC_047910: u-spanin; -; phage(gi100032)	3.9e-113
22	718557..718742	hypothetical protein; -	0
23	718739..719395	hypothetical protein; -	0
24	719392..719589	PHAGE_Bacill_SP_15_NC_031245: hypothetical protein; -; phage(gi100310)	4.92e-10
25	719685..720020	hypothetical protein; -	0
26	720216..720503	hypothetical protein; -	0
27	720675..720857	hypothetical protein; -	0
28	720971..722575	PHAGE_Gordon_Zirinka_NC_031097: hypothetical protein; -; phage(gi100002)	1.92e-105
29	722606..723202	hypothetical protein; -	0
30	723271..724587	PHAGE_Pseudo_phi2_NC_030931: hypothetical protein; -; phage(gi100031)	3.52e-83
31	724584..725462	PHAGE_Bacill_vB_BhaS_171_NC_030904: hypothetical protein; -; phage(gi100008)	5.35e-33
32	725481..726707	PHAGE_Salmon_118970_sal3_NC_031940: hypothetical protein; -; phage(gi100008)	8.77e-41
33	726729..727046	uncharacterized phage protein (possible DNA packaging); -	0
34	727157..727381	phage head-tail adaptor, putative; -	0
35	727384..727821	Phage protein, HK97, gp10; -	0
36	727818..728162	FIG00516578: hypothetical protein; -	0
37	728180..728776	PHAGE_Butyri_Arawn_NC_048848: hypothetical protein; -; phage(gi100011)	3.84e-41
38	728795..729214	PHAGE_Butyri_Arawn_NC_048848: hypothetical protein; -; phage(gi100012)	1.18e-07
39	complement(729408..729923)	hypothetical protein; -	0
40	729986..732664	PHAGE_Microb_Pikmin_NC_042119: hypothetical protein; -; phage(gi100017)	2.8e-98
41	732664..733356	PHAGE_Lactob_PLE2_NC_031036: hypothetical protein; -; phage(gi100016)	7.47e-22
42	733429..737295	PHAGE_Lactob_PLE2_NC_031036: hypothetical protein; -; phage(gi100017)	9.68e-72
43	737309..737731	PHAGE_Lactob_LpeD_NC_048677: hypothetical protein; -; phage(gi100022)	1.3e-21
44	737728..737946	hypothetical protein; -	0
45	738029..738496	PHAGE_Bacill_PfEFR_4_NC_048641: hypothetical protein; -; phage(gi100023)	2.42e-27
46	738496..739320	PHAGE_Propio_B3_NC_041892: hypothetical protein; -; phage(gi100025)	2.26e-73
47	739477..739884	Zinc-finger protein; -	0
48	739881..740069	hypothetical protein; -	0
49	740136..741389	PHAGE_Anoxyb_A403_NC_048701: tail length tape-measure protein; -; phage(gi100057)	1.92e-35
50	741386..742954	PHAGE_Lactoc_28201_NC_031013: methyltransferase type 11; -; phage(gi100001)	4.34e-28
51	755648..755659	attR	0
Region 3, total 30 CDS
#	CDS Position	BLAST Hit	E-Value
1	1609464..1610021	PHAGE_Arthro_vB_ArS_ArV2_NC_022972: tape measure protein; -; phage(gi563398126)	2.69e-06
2	complement(1610004..1610885)	PHAGE_Bacill_vB_BtS_B83_NC_048762: hypothetical protein; -; phage(gi100002)	1.98e-30
3	complement(1611184..1612842)	PHAGE_Thermu_OH2_NC_021784: SMF family protein; -; phage(gi526118339)	3.78e-21
4	complement(1612811..1613365)	PROPHAGE_Escher_Sakai: putative ATP-dependent protease; -; phage(gi15833954)	2.54e-39
5	complement(1613356..1613652)	MG(2+) CHELATASE FAMILY PROTEIN / ComM-related protein; -	0
6	complement(1613702..1613902)	PROPHAGE_Escher_Sakai: putative ATP-dependent protease; -; phage(gi15833954)	5.06e-10
7	complement(1613889..1614290)	UPF0102 protein YraN; -	0
8	complement(1614852..1615235)	PHAGE_Faecal_FP_Brigit_NC_047909: hypothetical protein; -; phage(gi100017)	1.39e-13
9	complement(1615323..1615772)	Phage terminase, small subunit; -	0
10	1615803..1616765	hypothetical protein; -	0
11	1617027..1617365	hypothetical protein; -	0
12	complement(1617496..1617960)	hypothetical protein; -	0
13	complement(1617957..1618688)	PHAGE_Coryne_SamW_NC_048069: HNH endonuclease; -; phage(gi100046)	7.32e-98
14	complement(1618678..1619322)	PHAGE_Coryne_Stiles_NC_048789: putative single-stranded DNA binding protein; -; phage(gi100050)	4.18e-103
15	complement(1619303..1619581)	PHAGE_Coryne_Lederberg_NC_048790: DNA helicase; -; phage(gi100044)	1.3e-19
16	complement(1619737..1620171)	PHAGE_Mycoba_Henu3_NC_051589: hypothetical protein; -; phage(gi100020)	1.43e-12
17	complement(1620207..1621985)	PHAGE_Lactob_phiadh_NC_000896: putative DNA-polymerase or DNA-primase; -; phage(gi9633023)	1.25e-25
18	complement(1621982..1622173)	PHAGE_Faecal_FP_Lagaffe_NC_047911: hypothetical protein; -; phage(gi100051)	5.78e-05
19	complement(1622145..1622432)	hypothetical protein; -	0
20	complement(1622429..1623196)	PHAGE_Staphy_37_NC_007055: ORF016; -; phage(gi66395745)	1.12e-53
21	1623352..1623828	hypothetical protein; -	0
22	1623924..1624184	hypothetical protein; -	0
23	complement(1624229..1624714)	PHAGE_Coryne_StAB_NC_048780: HNH endonuclease; -; phage(gi100046)	7.22e-51
24	complement(1624871..1625041)	PHAGE_Clostr_phiCT453A_NC_028991: hypothetical protein; -; phage(gi100018)	1.66e-21
25	complement(1625576..1626106)	PHAGE_Coryne_StAB_NC_048780: HNH endonuclease; -; phage(gi100046)	8.56e-43
26	complement(1626191..1626400)	hypothetical protein; -	0
27	complement(1626418..1626951)	PHAGE_Clostr_phiCT453A_NC_028991: hypothetical protein; -; phage(gi100017)	6.36e-67
28	complement(1626986..1628119)	PHAGE_Coryne_SamW_NC_048069: DNA adenine methyltransferase; -; phage(gi100041)	4.83e-140
29	complement(1628112..1628279)	PHAGE_Coryne_Stiles_NC_048789: hypothetical protein; -; phage(gi100042)	1.01e-10
30	complement(1628276..1628515)	hypothetical phage-associated protein; -	0
Region 4, total 23 CDS
#	CDS Position	BLAST Hit	E-Value
1	2121747..2121759	attL	0
2	complement(2126153..2127049)	PHAGE_Strept_Hiyaa_NC_048139: hypothetical protein; -; phage(gi100022)	4.3e-11
3	complement(2127079..2127237)	hypothetical protein; -	0
4	complement(2127246..2128469)	PHAGE_Gordon_Gsput1_NC_030932: hypothetical protein; -; phage(gi100018)	7.56e-65
5	complement(2128451..2128855)	hypothetical protein; -	0
6	complement(2128875..2129105)	hypothetical protein; -	0
7	complement(2129182..2129529)	hypothetical protein; -	0
8	complement(2129624..2130541)	PHAGE_Gordon_Schwabeltier_NC_031255: hypothetical protein; -; phage(gi100012)	4.48e-06
9	complement(2130544..2130927)	hypothetical protein; -	0
10	complement(2130927..2131205)	PHAGE_Arthro_DrManhattan_NC_048093: hypothetical protein; -; phage(gi100011)	1.15e-05
11	complement(2131218..2131541)	hypothetical protein; -	0
12	2131572..2131733	hypothetical protein; -	0
13	complement(2131924..2132052)	hypothetical protein; -	0
14	complement(2132112..2132420)	hypothetical protein; -	0
15	complement(2132433..2133353)	PHAGE_Coryne_StAB_NC_048780: hypothetical protein; -; phage(gi100006)	5.11e-89
16	complement(2133384..2133782)	PHAGE_Coryne_SamW_NC_048069: hypothetical protein; -; phage(gi100005)	5.57e-22
17	complement(2133798..2135114)	PHAGE_Gordon_Blueberry_NC_030943: hypothetical protein; -; phage(gi100004)	1.89e-44
18	complement(2135111..2136604)	PHAGE_Coryne_Stiles_NC_048789: hypothetical protein; -; phage(gi100003)	4.82e-92
19	complement(2136626..2136766)	hypothetical protein; -	0
20	complement(2136797..2137348)	PHAGE_Gordon_Bowser_NC_030930: hypothetical protein; -; phage(gi100002)	1.27e-11
21	2137393..2138310	hypothetical protein; -	0
22	2138535..2138547	attR	0
23	2138748..2139530	PHAGE_Gordon_Gsput1_NC_030932: hypothetical protein; -; phage(gi100028)	5.01e-34
PO38/4
Total: 3 prophage regions have been identified, of which 0 regions are intact, 1 regions are incomplete, and 2 regions are questionable.
Region	Region Length	Completeness	Score	# Total Proteins	Region Position	Most Common Phage	GC %
1	38Kb	questionable	70	40	168000-206074	PHAGE_Gordon_Nyceirae_NC_031004(10)	0.5271
2	59.8Kb	questionable	90	50	695800-755648	PHAGE_Coryne_Lederberg_NC_048790(6)	0.5759
3	17.7Kb	incomplete	10	22	2121805-2139582	PHAGE_Coryne_SamW_NC_048069(4)	0.548
Region 1, total 42 CDS
#	CDS Position	BLAST Hit	E-Value
1	168000..168048	attL	0
2	168284..168658	PHAGE_Mycoba_Xavia_NC_051740: hypothetical protein; -; phage(gi100039)	2.26e-21
3	168642..168956	hypothetical protein; -	0
4	complement(169097..169915)	PHAGE_Coryne_Poushou_NC_042139: endolysin; -; phage(gi100033)	1.31e-93
5	complement(169912..170322)	PHAGE_Coryne_Poushou_NC_042139: endolysin; -; phage(gi100033)	4.68e-09
6	complement(170444..170674)	PHAGE_Rhodoc_REQ2_NC_016652: hypothetical protein; -; phage(gi372449852)	1.27e-18
7	complement(170677..170946)	hypothetical protein; -	0
8	complement(171041..171448)	PHAGE_Coryne_Poushou_NC_042139: hypothetical protein; -; phage(gi100035)	9.88e-64
9	complement(171458..171949)	PHAGE_Coryne_Poushou_NC_042139: hypothetical protein; -; phage(gi100036)	5.69e-21
10	172069..172308	Transcriptional regulator; -	0
11	172356..172823	hypothetical protein; -	0
12	172893..173399	hypothetical protein; -	0
13	complement(173435..174337)	hypothetical protein; -	0
14	174395..174622	hypothetical protein; -	0
15	174638..175651	PHAGE_Mycoba_Willsammy_NC_051727: holin; -; phage(gi100034)	7.44e-61
16	175732..176490	PHAGE_Coryne_Poushou_NC_042139: recombination protein; -; phage(gi100049)	4.96e-25
17	176487..176903	PHAGE_Coryne_Poushou_NC_042139: putative single-stranded DNA binding protein; -; phage(gi100050)	8.96e-22
18	176931..177752	PHAGE_Coryne_Poushou_NC_042139: tail fiber protein; -; phage(gi100052)	3.54e-108
19	177874..178449	PHAGE_Coryne_Poushou_NC_042139: tail assembly protein; -; phage(gi100053)	2.38e-24
20	178554..178949	hypothetical protein; -	0
21	179074..179553	PHAGE_Gordon_Nyceirae_NC_031004: hypothetical protein; -; phage(gi100004)	5.21e-29
22	179537..180607	PHAGE_Gordon_Nyceirae_NC_031004: hypothetical protein; -; phage(gi100005)	1.75e-138
23	180582..181193	PHAGE_Gordon_Nyceirae_NC_031004: hypothetical protein; -; phage(gi100006)	1.96e-72
24	181193..181369	hypothetical protein; -	0
25	181984..182520	PHAGE_Mycoba_JC27_NC_042320: hypothetical protein; -; phage(gi100014)	4.49e-20
26	182539..184239	PHAGE_Gordon_Nyceirae_NC_031004: hypothetical protein; -; phage(gi100008)	1.84e-42
27	184236..184538	hypothetical protein; -	0
28	184615..185235	PHAGE_Mycoba_Benedict_NC_042331: hypothetical protein; -; phage(gi100012)	7.61e-05
29	185247..186236	PHAGE_Gordon_GMA1_NC_030902: hypothetical protein; -; phage(gi100006)	4.47e-123
30	186248..186547	PHAGE_Strept_Picard_NC_047794: hypothetical protein; -; phage(gi100008)	3.16e-05
31	186560..187027	hypothetical protein; -	0
32	187331..187651	PHAGE_Gordon_Nyceirae_NC_031004: hypothetical protein; -; phage(gi100016)	4.94e-22
33	187660..188103	PHAGE_Gordon_Nyceirae_NC_031004: hypothetical protein; -; phage(gi100017)	2.82e-13
34	188121..188273	hypothetical protein; -	0
35	188333..188962	PHAGE_Gordon_Nyceirae_NC_031004: hypothetical protein; -; phage(gi100018)	6.49e-12
36	189058..189411	hypothetical protein; -	0
37	189450..189860	PHAGE_Gordon_Nyceirae_NC_031004: hypothetical protein; -; phage(gi100020)	5.13e-12
38	189889..191337	PHAGE_Gordon_BritBrat_NC_030942: hypothetical protein; -; phage(gi100018)	5.15e-72
39	191334..192659	PHAGE_Gordon_Terrapin_NC_031001: hypothetical protein; -; phage(gi100022)	2.54e-33
40	192659..193570	PHAGE_Gordon_Splinter_NC_030927: hypothetical protein; -; phage(gi100020)	5.68e-25
41	193598..194533	PHAGE_Gordon_Obliviate_NC_031237: hypothetical protein; -; phage(gi100016)	2.36e-09
42	206074..206122	attR	0
Region 2, total 52 CDS
#	CDS Position	BLAST Hit	E-Value
1	695800..695811	attL	0
2	702119..702262	PHAGE_Clostr_CDKM9_NC_048642: tail fiber protein; -; phage(gi100052)	4.55e-09
3	702457..703050	hypothetical phage-associated protein; -	0
4	703152..703406	hypothetical protein; -	0
5	703403..703813	PHAGE_Coryne_Stiles_NC_048789: hypothetical protein; -; phage(gi100042)	3.31e-08
6	703806..704948	PHAGE_Coryne_SamW_NC_048069: DNA adenine methyltransferase; -; phage(gi100041)	1.1e-143
7	704954..705499	PHAGE_Coryne_SamW_NC_048069: hypothetical protein; -; phage(gi100042)	3.61e-72
8	705512..705709	hypothetical protein; -	0
9	705786..707753	PHAGE_Coryne_StAB_NC_048780: HNH endonuclease; -; phage(gi100046)	0
10	complement(707764..708588)	hypothetical protein; -	0
11	708847..709611	PHAGE_Staphy_37_NC_007055: ORF016; -; phage(gi66395745)	9.71e-52
12	709608..710051	PHAGE_Faecal_FP_Lagaffe_NC_047911: hypothetical protein; -; phage(gi100051)	1.1e-21
13	710048..712309	PHAGE_Lactob_T25_NC_048625: hypothetical protein; -; phage(gi100020)	2.37e-55
14	712452..712730	PHAGE_Coryne_Lederberg_NC_048790: DNA helicase; -; phage(gi100044)	4.45e-19
15	712711..714087	PHAGE_Coryne_Stiles_NC_048789: putative single-stranded DNA binding protein; -; phage(gi100050)	0
16	714075..714539	hypothetical phage-associated protein; -	0
17	complement(714622..715005)	hypothetical protein; -	0
18	715035..715178	hypothetical protein; -	0
19	715349..715924	Phage terminase, small subunit; -	0
20	716006..717190	PHAGE_Faecal_FP_Brigit_NC_047909: hypothetical protein; -; phage(gi100017)	9.31e-98
21	717162..718412	PHAGE_Faecal_FP_Epona_NC_047910: u-spanin; -; phage(gi100032)	3.9e-113
22	718558..718743	hypothetical protein; -	0
23	718740..719396	hypothetical protein; -	0
24	719393..719590	PHAGE_Bacill_SP_15_NC_031245: hypothetical protein; -; phage(gi100310)	4.92e-10
25	719686..720021	hypothetical protein; -	0
26	720217..720504	hypothetical protein; -	0
27	720676..720858	hypothetical protein; -	0
28	720972..722576	PHAGE_Gordon_Zirinka_NC_031097: hypothetical protein; -; phage(gi100002)	1.92e-105
29	722607..723203	hypothetical protein; -	0
30	723272..724588	PHAGE_Pseudo_phi2_NC_030931: hypothetical protein; -; phage(gi100031)	3.52e-83
31	724585..725463	PHAGE_Bacill_vB_BhaS_171_NC_030904: hypothetical protein; -; phage(gi100008)	5.35e-33
32	725482..726072	PHAGE_Burkho_KS9_NC_013055: major capsid protein gp5; -; phage(gi255033737)	2.94e-06
33	726069..726707	PHAGE_Azospi_Cd_NC_010355: Phage major capsid protein; -; phage(gi168495136)	3.43e-35
34	726729..727046	uncharacterized phage protein (possible DNA packaging); -	0
35	727157..727381	phage head-tail adaptor, putative; -	0
36	727384..727821	Phage protein, HK97, gp10; -	0
37	727818..728162	FIG00516578: hypothetical protein; -	0
38	728180..728776	PHAGE_Butyri_Arawn_NC_048848: hypothetical protein; -; phage(gi100011)	3.84e-41
39	728795..729214	PHAGE_Butyri_Arawn_NC_048848: hypothetical protein; -; phage(gi100012)	1.18e-07
40	complement(729408..729923)	hypothetical protein; -	0
41	729986..732664	PHAGE_Microb_Pikmin_NC_042119: hypothetical protein; -; phage(gi100017)	2.8e-98
42	732664..733356	PHAGE_Lactob_PLE2_NC_031036: hypothetical protein; -; phage(gi100016)	7.47e-22
43	733429..737295	PHAGE_Lactob_PLE2_NC_031036: hypothetical protein; -; phage(gi100017)	9.68e-72
44	737309..737731	PHAGE_Lactob_LpeD_NC_048677: hypothetical protein; -; phage(gi100022)	1.3e-21
45	737728..737946	hypothetical protein; -	0
46	738029..738496	PHAGE_Bacill_PfEFR_4_NC_048641: hypothetical protein; -; phage(gi100023)	2.42e-27
47	738496..739320	PHAGE_Propio_B3_NC_041892: hypothetical protein; -; phage(gi100025)	2.26e-73
48	739477..739884	Zinc-finger protein; -	0
49	739881..740069	hypothetical protein; -	0
50	740136..741389	PHAGE_Anoxyb_A403_NC_048701: tail length tape-measure protein; -; phage(gi100057)	1.92e-35
51	741386..742954	PHAGE_Lactoc_28201_NC_031013: methyltransferase type 11; -; phage(gi100001)	4.34e-28
52	755648..755659	attR	0
Region 3, total 24 CDS
#	CDS Position	BLAST Hit	E-Value
1	2121805..2121817	attL	0
2	complement(2126216..2127112)	PHAGE_Strept_Hiyaa_NC_048139: hypothetical protein; -; phage(gi100022)	4.3e-11
3	complement(2127142..2127300)	hypothetical protein; -	0
4	complement(2127309..2128532)	PHAGE_Gordon_Gsput1_NC_030932: hypothetical protein; -; phage(gi100018)	7.56e-65
5	complement(2128514..2128918)	hypothetical protein; -	0
6	complement(2128938..2129168)	hypothetical protein; -	0
7	2129189..2129611	hypothetical protein; -	0
8	complement(2129687..2130604)	PHAGE_Gordon_Schwabeltier_NC_031255: hypothetical protein; -; phage(gi100012)	4.48e-06
9	complement(2130607..2130990)	hypothetical protein; -	0
10	complement(2130990..2131268)	PHAGE_Arthro_DrManhattan_NC_048093: hypothetical protein; -; phage(gi100011)	1.15e-05
11	complement(2131281..2131592)	hypothetical protein; -	0
12	2131623..2131784	hypothetical protein; -	0
13	complement(2131975..2132103)	hypothetical protein; -	0
14	complement(2132163..2132471)	hypothetical protein; -	0
15	complement(2132484..2133404)	PHAGE_Coryne_StAB_NC_048780: hypothetical protein; -; phage(gi100006)	5.11e-89
16	complement(2133435..2133833)	PHAGE_Coryne_SamW_NC_048069: hypothetical protein; -; phage(gi100005)	5.57e-22
17	complement(2133849..2135165)	PHAGE_Gordon_Blueberry_NC_030943: hypothetical protein; -; phage(gi100004)	1.89e-44
18	complement(2135162..2135329)	PHAGE_Arthro_Vibaki_NC_049465: hypothetical protein; -; phage(gi100005)	1.19e-07
19	complement(2135310..2136656)	PHAGE_Coryne_Stiles_NC_048789: hypothetical protein; -; phage(gi100003)	1.51e-92
20	complement(2136678..2136818)	hypothetical protein; -	0
21	complement(2136849..2137400)	PHAGE_Gordon_Bowser_NC_030930: hypothetical protein; -; phage(gi100002)	1.27e-11
22	2137445..2138362	hypothetical protein; -	0
23	2138587..2138599	attR	0
24	2138800..2139582	PHAGE_Gordon_Gsput1_NC_030932: hypothetical protein; -; phage(gi100028)	5.01e-34	Showinfo_outli
PO39/4
Total: 4 prophage regions have been identified, of which 0 regions are intact, 2 regions are incomplete, and 2 regions are questionable.
Region	Region Length	Completeness	Score	# Total Proteins	Region Position	Most Common Phage	GC %
1	38Kb	questionable	80	41	168000-206074	PHAGE_Gordon_Nyceirae_NC_031004(10)	0.5271
2	59.8Kb	questionable	90	50	695800-755648	PHAGE_Coryne_Adelaide_NC_048791(6)	0.5759
3	19Kb	incomplete	40	30	1609553-1628604	PHAGE_Coryne_Lederberg_NC_048790(6)	0.5867
4	17.7Kb	incomplete	10	22	2121801-2139578	PHAGE_Coryne_Lederberg_NC_048790(4)	0.548
Region 1, total 43 CDS
#	CDS Position	BLAST Hit	E-Value
1	168000..168048	attL	0
2	168284..168658	PHAGE_Mycoba_Xavia_NC_051740: hypothetical protein; -; phage(gi100039)	2.26e-21
3	168642..168956	hypothetical protein; -	0
4	complement(169097..169915)	PHAGE_Coryne_Poushou_NC_042139: endolysin; -; phage(gi100033)	1.31e-93
5	complement(169912..170322)	PHAGE_Coryne_Poushou_NC_042139: endolysin; -; phage(gi100033)	4.68e-09
6	complement(170444..170674)	PHAGE_Rhodoc_REQ2_NC_016652: hypothetical protein; -; phage(gi372449852)	1.27e-18
7	complement(170677..170946)	hypothetical protein; -	0
8	complement(171041..171448)	PHAGE_Coryne_Poushou_NC_042139: hypothetical protein; -; phage(gi100035)	9.88e-64
9	complement(171458..171949)	PHAGE_Coryne_Poushou_NC_042139: hypothetical protein; -; phage(gi100036)	5.69e-21
10	172069..172308	Transcriptional regulator; -	0
11	172356..172823	hypothetical protein; -	0
12	172893..173399	hypothetical protein; -	0
13	complement(173435..174337)	hypothetical protein; -	0
14	174395..174622	hypothetical protein; -	0
15	174638..175651	PHAGE_Mycoba_Willsammy_NC_051727: holin; -; phage(gi100034)	7.44e-61
16	175732..176490	PHAGE_Coryne_Poushou_NC_042139: recombination protein; -; phage(gi100049)	4.96e-25
17	176487..176903	PHAGE_Coryne_Poushou_NC_042139: putative single-stranded DNA binding protein; -; phage(gi100050)	8.96e-22
18	176931..177752	PHAGE_Coryne_Poushou_NC_042139: tail fiber protein; -; phage(gi100052)	3.54e-108
19	177874..178449	PHAGE_Coryne_Poushou_NC_042139: tail assembly protein; -; phage(gi100053)	2.38e-24
20	178554..178949	hypothetical protein; -	0
21	179074..179553	PHAGE_Gordon_Nyceirae_NC_031004: hypothetical protein; -; phage(gi100004)	5.21e-29
22	179537..180607	PHAGE_Gordon_Nyceirae_NC_031004: hypothetical protein; -; phage(gi100005)	1.75e-138
23	180582..181193	PHAGE_Gordon_Nyceirae_NC_031004: hypothetical protein; -; phage(gi100006)	1.96e-72
24	181193..181369	hypothetical protein; -	0
25	181412..182137	PHAGE_Rhodoc_Hiro_NC_048669: hypothetical protein; -; phage(gi100009)	3.56e-34
26	182134..182520	PHAGE_Mycoba_20ES_NC_023597: portal protein; -; phage(gi589892623)	1.82e-11
27	182539..184239	PHAGE_Gordon_Nyceirae_NC_031004: hypothetical protein; -; phage(gi100008)	1.84e-42
28	184236..184538	hypothetical protein; -	0
29	184615..185235	PHAGE_Mycoba_Benedict_NC_042331: hypothetical protein; -; phage(gi100012)	7.61e-05
30	185247..186236	PHAGE_Gordon_GMA1_NC_030902: hypothetical protein; -; phage(gi100006)	4.47e-123
31	186248..186547	PHAGE_Strept_Picard_NC_047794: hypothetical protein; -; phage(gi100008)	3.16e-05
32	186560..187027	hypothetical protein; -	0
33	187331..187651	PHAGE_Gordon_Nyceirae_NC_031004: hypothetical protein; -; phage(gi100016)	4.94e-22
34	187660..188103	PHAGE_Gordon_Nyceirae_NC_031004: hypothetical protein; -; phage(gi100017)	2.82e-13
35	188121..188273	hypothetical protein; -	0
36	188333..188962	PHAGE_Gordon_Nyceirae_NC_031004: hypothetical protein; -; phage(gi100018)	6.49e-12
37	189058..189411	hypothetical protein; -	0
38	189450..189860	PHAGE_Gordon_Nyceirae_NC_031004: hypothetical protein; -; phage(gi100020)	5.13e-12
39	189889..191337	PHAGE_Gordon_BritBrat_NC_030942: hypothetical protein; -; phage(gi100018)	5.15e-72
40	191334..192659	PHAGE_Gordon_Terrapin_NC_031001: hypothetical protein; -; phage(gi100022)	2.54e-33
41	192659..193570	PHAGE_Gordon_Splinter_NC_030927: hypothetical protein; -; phage(gi100020)	5.68e-25
42	193598..194533	PHAGE_Gordon_Obliviate_NC_031237: hypothetical protein; -; phage(gi100016)	2.36e-09
43	206074..206122	attR	0
Region 2, total 52 CDS
#	CDS Position	BLAST Hit	E-Value
1	695800..695811	attL	0
2	702119..702262	PHAGE_Clostr_CDKM9_NC_048642: tail fiber protein; -; phage(gi100052)	4.55e-09
3	702457..703050	hypothetical phage-associated protein; -	0
4	703152..703406	hypothetical protein; -	0
5	703403..703813	PHAGE_Coryne_Stiles_NC_048789: hypothetical protein; -; phage(gi100042)	3.31e-08
6	703806..704948	PHAGE_Coryne_SamW_NC_048069: DNA adenine methyltransferase; -; phage(gi100041)	1.1e-143
7	704954..705499	PHAGE_Coryne_SamW_NC_048069: hypothetical protein; -; phage(gi100042)	3.61e-72
8	705512..705709	hypothetical protein; -	0
9	705786..707753	PHAGE_Coryne_StAB_NC_048780: HNH endonuclease; -; phage(gi100046)	0
10	complement(707764..708588)	hypothetical protein; -	0
11	708847..709611	PHAGE_Staphy_37_NC_007055: ORF016; -; phage(gi66395745)	9.71e-52
12	709608..710051	PHAGE_Faecal_FP_Lagaffe_NC_047911: hypothetical protein; -; phage(gi100051)	1.1e-21
13	710048..712309	PHAGE_Lactob_T25_NC_048625: hypothetical protein; -; phage(gi100020)	2.37e-55
14	712452..712730	PHAGE_Coryne_Lederberg_NC_048790: DNA helicase; -; phage(gi100044)	4.45e-19
15	712711..714087	PHAGE_Coryne_Stiles_NC_048789: putative single-stranded DNA binding protein; -; phage(gi100050)	0
16	714075..714539	hypothetical phage-associated protein; -	0
17	complement(714622..715005)	hypothetical protein; -	0
18	715035..715178	hypothetical protein; -	0
19	715349..715924	Phage terminase, small subunit; -	0
20	716006..717190	PHAGE_Faecal_FP_Brigit_NC_047909: hypothetical protein; -; phage(gi100017)	9.31e-98
21	717162..718412	PHAGE_Faecal_FP_Epona_NC_047910: u-spanin; -; phage(gi100032)	3.9e-113
22	718558..718743	hypothetical protein; -	0
23	718740..719396	hypothetical protein; -	0
24	719393..719590	PHAGE_Bacill_SP_15_NC_031245: hypothetical protein; -; phage(gi100310)	4.92e-10
25	719686..720021	hypothetical protein; -	0
26	720217..720504	hypothetical protein; -	0
27	720676..720858	hypothetical protein; -	0
28	720972..722576	PHAGE_Gordon_Zirinka_NC_031097: hypothetical protein; -; phage(gi100002)	1.92e-105
29	722607..723203	hypothetical protein; -	0
30	723272..724588	PHAGE_Pseudo_phi2_NC_030931: hypothetical protein; -; phage(gi100031)	3.52e-83
31	724585..725463	PHAGE_Bacill_vB_BhaS_171_NC_030904: hypothetical protein; -; phage(gi100008)	5.35e-33
32	725482..726072	PHAGE_Burkho_KS9_NC_013055: major capsid protein gp5; -; phage(gi255033737)	2.94e-06
33	726069..726707	PHAGE_Azospi_Cd_NC_010355: Phage major capsid protein; -; phage(gi168495136)	3.43e-35
34	726729..727046	uncharacterized phage protein (possible DNA packaging); -	0
35	727157..727381	phage head-tail adaptor, putative; -	0
36	727384..727821	Phage protein, HK97, gp10; -	0
37	727818..728162	FIG00516578: hypothetical protein; -	0
38	728180..728776	PHAGE_Butyri_Arawn_NC_048848: hypothetical protein; -; phage(gi100011)	3.84e-41
39	728795..729214	PHAGE_Butyri_Arawn_NC_048848: hypothetical protein; -; phage(gi100012)	1.18e-07
40	complement(729408..729923)	hypothetical protein; -	0
41	729986..732664	PHAGE_Microb_Pikmin_NC_042119: hypothetical protein; -; phage(gi100017)	2.8e-98
42	732664..733356	PHAGE_Lactob_PLE2_NC_031036: hypothetical protein; -; phage(gi100016)	7.47e-22
43	733429..737295	PHAGE_Lactob_PLE2_NC_031036: hypothetical protein; -; phage(gi100017)	9.68e-72
44	737309..737731	PHAGE_Lactob_LpeD_NC_048677: hypothetical protein; -; phage(gi100022)	1.3e-21
45	737728..737946	hypothetical protein; -	0
46	738029..738496	PHAGE_Bacill_PfEFR_4_NC_048641: hypothetical protein; -; phage(gi100023)	2.42e-27
47	738496..739320	PHAGE_Propio_B3_NC_041892: hypothetical protein; -; phage(gi100025)	2.26e-73
48	739477..739884	Zinc-finger protein; -	0
49	739881..740069	hypothetical protein; -	0
50	740136..741389	PHAGE_Anoxyb_A403_NC_048701: tail length tape-measure protein; -; phage(gi100057)	1.92e-35
51	741386..742954	PHAGE_Lactoc_28201_NC_031013: methyltransferase type 11; -; phage(gi100001)	4.34e-28
52	755648..755659	attR	0
Region 3, total 30 CDS
#	CDS Position	BLAST Hit	E-Value
1	1609553..1610110	PHAGE_Arthro_vB_ArS_ArV2_NC_022972: tape measure protein; -; phage(gi563398126)	2.69e-06
2	complement(1610093..1610974)	PHAGE_Bacill_vB_BtS_B83_NC_048762: hypothetical protein; -; phage(gi100002)	1.98e-30
3	complement(1611273..1612931)	PHAGE_Thermu_OH2_NC_021784: SMF family protein; -; phage(gi526118339)	3.78e-21
4	complement(1612900..1613454)	PROPHAGE_Escher_Sakai: putative ATP-dependent protease; -; phage(gi15833954)	2.54e-39
5	complement(1613445..1613735)	MG(2+) CHELATASE FAMILY PROTEIN / ComM-related protein; -	0
6	complement(1613791..1613991)	PROPHAGE_Escher_Sakai: putative ATP-dependent protease; -; phage(gi15833954)	5.06e-10
7	complement(1613978..1614379)	UPF0102 protein YraN; -	0
8	complement(1614941..1615324)	PHAGE_Faecal_FP_Brigit_NC_047909: hypothetical protein; -; phage(gi100017)	1.39e-13
9	complement(1615412..1615861)	Phage terminase, small subunit; -	0
10	1615892..1616854	hypothetical protein; -	0
11	1617116..1617454	hypothetical protein; -	0
12	complement(1617585..1618049)	hypothetical protein; -	0
13	complement(1618046..1618777)	PHAGE_Coryne_SamW_NC_048069: HNH endonuclease; -; phage(gi100046)	7.32e-98
14	complement(1618767..1619411)	PHAGE_Coryne_Stiles_NC_048789: putative single-stranded DNA binding protein; -; phage(gi100050)	4.18e-103
15	complement(1619392..1619670)	PHAGE_Coryne_Lederberg_NC_048790: DNA helicase; -; phage(gi100044)	1.3e-19
16	complement(1619826..1620260)	PHAGE_Mycoba_Henu3_NC_051589: hypothetical protein; -; phage(gi100020)	1.43e-12
17	complement(1620296..1622074)	PHAGE_Lactob_phiadh_NC_000896: putative DNA-polymerase or DNA-primase; -; phage(gi9633023)	1.25e-25
18	complement(1622071..1622262)	PHAGE_Faecal_FP_Lagaffe_NC_047911: hypothetical protein; -; phage(gi100051)	5.78e-05
19	complement(1622234..1622521)	hypothetical protein; -	0
20	complement(1622518..1623285)	PHAGE_Staphy_37_NC_007055: ORF016; -; phage(gi66395745)	1.12e-53
21	1623441..1623917	hypothetical protein; -	0
22	1624013..1624273	hypothetical protein; -	0
23	complement(1624318..1624803)	PHAGE_Coryne_StAB_NC_048780: HNH endonuclease; -; phage(gi100046)	7.22e-51
24	complement(1624960..1625130)	PHAGE_Clostr_phiCT453A_NC_028991: hypothetical protein; -; phage(gi100018)	1.66e-21
25	complement(1625665..1626195)	PHAGE_Coryne_StAB_NC_048780: HNH endonuclease; -; phage(gi100046)	8.56e-43
26	complement(1626280..1626489)	hypothetical protein; -	0
27	complement(1626507..1627040)	PHAGE_Clostr_phiCT453A_NC_028991: hypothetical protein; -; phage(gi100017)	6.36e-67
28	complement(1627075..1628208)	PHAGE_Coryne_SamW_NC_048069: DNA adenine methyltransferase; -; phage(gi100041)	4.83e-140
29	complement(1628201..1628368)	PHAGE_Coryne_Stiles_NC_048789: hypothetical protein; -; phage(gi100042)	1.01e-10
30	complement(1628365..1628604)	hypothetical phage-associated protein; -	0
Region 4, total 24 CDS
#	CDS Position	BLAST Hit	E-Value
1	2121801..2121813	attL	0
2	complement(2126212..2127108)	PHAGE_Strept_Hiyaa_NC_048139: hypothetical protein; -; phage(gi100022)	4.3e-11
3	complement(2127138..2127296)	hypothetical protein; -	0
4	complement(2127305..2128507)	PHAGE_Gordon_Gsput1_NC_030932: hypothetical protein; -; phage(gi100018)	5.68e-65
5	complement(2128510..2128914)	hypothetical protein; -	0
6	complement(2128934..2129080)	hypothetical protein; -	0
7	2129185..2129607	hypothetical protein; -	0
8	complement(2129683..2130600)	PHAGE_Gordon_Schwabeltier_NC_031255: hypothetical protein; -; phage(gi100012)	4.48e-06
9	complement(2130603..2130986)	hypothetical protein; -	0
10	complement(2130986..2131264)	PHAGE_Arthro_DrManhattan_NC_048093: hypothetical protein; -; phage(gi100011)	1.15e-05
11	complement(2131277..2131588)	hypothetical protein; -	0
12	2131622..2131780	hypothetical protein; -	0
13	complement(2131971..2132099)	hypothetical protein; -	0
14	complement(2132159..2132467)	hypothetical protein; -	0
15	complement(2132480..2133400)	PHAGE_Coryne_StAB_NC_048780: hypothetical protein; -; phage(gi100006)	5.11e-89
16	complement(2133431..2133829)	PHAGE_Coryne_SamW_NC_048069: hypothetical protein; -; phage(gi100005)	5.57e-22
17	complement(2133845..2135161)	PHAGE_Gordon_Blueberry_NC_030943: hypothetical protein; -; phage(gi100004)	1.89e-44
18	complement(2135158..2135325)	PHAGE_Arthro_Vibaki_NC_049465: hypothetical protein; -; phage(gi100005)	1.19e-07
19	complement(2135306..2136652)	PHAGE_Coryne_Stiles_NC_048789: hypothetical protein; -; phage(gi100003)	1.51e-92
20	complement(2136674..2136832)	hypothetical protein; -	0
21	complement(2136845..2137396)	PHAGE_Gordon_Bowser_NC_030930: hypothetical protein; -; phage(gi100002)	1.27e-11
22	2137441..2138358	hypothetical protein; -	0
23	2138583..2138595	attR	0
24	2138796..2139578	PHAGE_Gordon_Gsput1_NC_030932: hypothetical protein; -; phage(gi100028)	5.01e-34	Showinfo_o
PO100/5
Total: 4 prophage regions have been identified, of which 0 regions are intact, 2 regions are incomplete, and 2 regions are questionable.
Region	Region Length	Completeness	Score	# Total Proteins	Region Position	Most Common Phage	GC %
1	38Kb	questionable	80	41	168002-206065	PHAGE_Gordon_Nyceirae_NC_031004(10)	0.5271
2	59.8Kb	questionable	70	49	695826-755675	PHAGE_Coryne_Lederberg_NC_048790(6)	0.5759
3	19Kb	incomplete	40	29	1609563-1628613	PHAGE_Coryne_Adelaide_NC_048791(6)	0.5867
4	25.7Kb	incomplete	20	23	2113949-2139652	PHAGE_Coryne_StAB_NC_048780(4)	0.54
Region 1, total 43 CDS
#	CDS Position	BLAST Hit	E-Value
1	168002..168050	attL	0
2	168275..168649	PHAGE_Mycoba_Xavia_NC_051740: hypothetical protein; -; phage(gi100039)	2.26e-21
3	168633..168947	hypothetical protein; -	0
4	complement(169088..169906)	PHAGE_Coryne_Poushou_NC_042139: endolysin; -; phage(gi100033)	1.31e-93
5	complement(169903..170313)	PHAGE_Coryne_Poushou_NC_042139: endolysin; -; phage(gi100033)	4.68e-09
6	complement(170435..170665)	PHAGE_Rhodoc_REQ2_NC_016652: hypothetical protein; -; phage(gi372449852)	1.27e-18
7	complement(170668..170937)	hypothetical protein; -	0
8	complement(171032..171439)	PHAGE_Coryne_Poushou_NC_042139: hypothetical protein; -; phage(gi100035)	9.88e-64
9	complement(171449..171940)	PHAGE_Coryne_Poushou_NC_042139: hypothetical protein; -; phage(gi100036)	5.69e-21
10	172060..172299	Transcriptional regulator; -	0
11	172347..172814	hypothetical protein; -	0
12	172884..173390	hypothetical protein; -	0
13	complement(173426..174328)	hypothetical protein; -	0
14	174386..174613	hypothetical protein; -	0
15	174629..175642	PHAGE_Mycoba_Willsammy_NC_051727: holin; -; phage(gi100034)	7.44e-61
16	175723..176481	PHAGE_Coryne_Poushou_NC_042139: recombination protein; -; phage(gi100049)	4.96e-25
17	176478..176894	PHAGE_Coryne_Poushou_NC_042139: putative single-stranded DNA binding protein; -; phage(gi100050)	8.96e-22
18	176922..177743	PHAGE_Coryne_Poushou_NC_042139: tail fiber protein; -; phage(gi100052)	3.54e-108
19	177865..178440	PHAGE_Coryne_Poushou_NC_042139: tail assembly protein; -; phage(gi100053)	2.38e-24
20	178545..178940	hypothetical protein; -	0
21	179065..179544	PHAGE_Gordon_Nyceirae_NC_031004: hypothetical protein; -; phage(gi100004)	5.21e-29
22	179528..180598	PHAGE_Gordon_Nyceirae_NC_031004: hypothetical protein; -; phage(gi100005)	1.75e-138
23	180573..181184	PHAGE_Gordon_Nyceirae_NC_031004: hypothetical protein; -; phage(gi100006)	1.96e-72
24	181184..181360	hypothetical protein; -	0
25	181403..182128	PHAGE_Rhodoc_Hiro_NC_048669: hypothetical protein; -; phage(gi100009)	3.56e-34
26	182125..182511	PHAGE_Mycoba_20ES_NC_023597: portal protein; -; phage(gi589892623)	1.82e-11
27	182530..184230	PHAGE_Gordon_Nyceirae_NC_031004: hypothetical protein; -; phage(gi100008)	1.84e-42
28	184227..184529	hypothetical protein; -	0
29	184606..185226	PHAGE_Mycoba_Benedict_NC_042331: hypothetical protein; -; phage(gi100012)	7.61e-05
30	185238..186227	PHAGE_Gordon_GMA1_NC_030902: hypothetical protein; -; phage(gi100006)	4.47e-123
31	186239..186538	PHAGE_Strept_Picard_NC_047794: hypothetical protein; -; phage(gi100008)	3.16e-05
32	186551..187018	hypothetical protein; -	0
33	187322..187642	PHAGE_Gordon_Nyceirae_NC_031004: hypothetical protein; -; phage(gi100016)	4.94e-22
34	187651..188094	PHAGE_Gordon_Nyceirae_NC_031004: hypothetical protein; -; phage(gi100017)	2.82e-13
35	188112..188264	hypothetical protein; -	0
36	188324..188953	PHAGE_Gordon_Nyceirae_NC_031004: hypothetical protein; -; phage(gi100018)	6.49e-12
37	189049..189402	hypothetical protein; -	0
38	189441..189851	PHAGE_Gordon_Nyceirae_NC_031004: hypothetical protein; -; phage(gi100020)	5.13e-12
39	189880..191328	PHAGE_Gordon_BritBrat_NC_030942: hypothetical protein; -; phage(gi100018)	5.15e-72
40	191325..192650	PHAGE_Gordon_Terrapin_NC_031001: hypothetical protein; -; phage(gi100022)	2.54e-33
41	192650..193561	PHAGE_Gordon_Splinter_NC_030927: hypothetical protein; -; phage(gi100020)	5.68e-25
42	193589..194524	PHAGE_Gordon_Obliviate_NC_031237: hypothetical protein; -; phage(gi100016)	2.36e-09
43	206065..206113	attR	0
Region 2, total 51 CDS
#	CDS Position	BLAST Hit	E-Value
1	695826..695837	attL	0
2	702145..702288	PHAGE_Clostr_CDKM9_NC_048642: tail fiber protein; -; phage(gi100052)	4.55e-09
3	702483..703076	hypothetical phage-associated protein; -	0
4	703178..703432	hypothetical protein; -	0
5	703429..703839	PHAGE_Coryne_Stiles_NC_048789: hypothetical protein; -; phage(gi100042)	3.31e-08
6	703832..704974	PHAGE_Coryne_SamW_NC_048069: DNA adenine methyltransferase; -; phage(gi100041)	1.1e-143
7	704980..705525	PHAGE_Coryne_SamW_NC_048069: hypothetical protein; -; phage(gi100042)	3.61e-72
8	705538..705735	hypothetical protein; -	0
9	705812..707779	PHAGE_Coryne_StAB_NC_048780: HNH endonuclease; -; phage(gi100046)	0
10	complement(707790..708614)	hypothetical protein; -	0
11	708873..709637	PHAGE_Staphy_37_NC_007055: ORF016; -; phage(gi66395745)	9.71e-52
12	709634..710077	PHAGE_Faecal_FP_Lagaffe_NC_047911: hypothetical protein; -; phage(gi100051)	1.1e-21
13	710074..712335	PHAGE_Lactob_A2_NC_004112: putative primase; -; phage(gi22296557)	5.93e-59
14	712478..712756	PHAGE_Coryne_Lederberg_NC_048790: DNA helicase; -; phage(gi100044)	4.45e-19
15	712737..714113	PHAGE_Coryne_Stiles_NC_048789: putative single-stranded DNA binding protein; -; phage(gi100050)	0
16	714101..714565	hypothetical phage-associated protein; -	0
17	complement(714648..715031)	hypothetical protein; -	0
18	715061..715204	hypothetical protein; -	0
19	715375..715950	Phage terminase, small subunit; -	0
20	716032..717216	PHAGE_Faecal_FP_Brigit_NC_047909: hypothetical protein; -; phage(gi100017)	9.31e-98
21	717188..718438	PHAGE_Faecal_FP_Epona_NC_047910: u-spanin; -; phage(gi100032)	3.9e-113
22	718584..718769	hypothetical protein; -	0
23	718766..719422	hypothetical protein; -	0
24	719419..719616	PHAGE_Bacill_SP_15_NC_031245: hypothetical protein; -; phage(gi100310)	4.92e-10
25	719712..720047	hypothetical protein; -	0
26	720243..720530	hypothetical protein; -	0
27	720702..720884	hypothetical protein; -	0
28	720998..722602	PHAGE_Gordon_Zirinka_NC_031097: hypothetical protein; -; phage(gi100002)	1.92e-105
29	722633..723229	hypothetical protein; -	0
30	723298..724614	PHAGE_Pseudo_phi2_NC_030931: hypothetical protein; -; phage(gi100031)	3.52e-83
31	724611..725489	PHAGE_Bacill_vB_BhaS_171_NC_030904: hypothetical protein; -; phage(gi100008)	5.35e-33
32	725508..726734	PHAGE_Salmon_118970_sal3_NC_031940: hypothetical protein; -; phage(gi100008)	8.77e-41
33	726756..727073	uncharacterized phage protein (possible DNA packaging); -	0
34	727184..727408	phage head-tail adaptor, putative; -	0
35	727411..727848	Phage protein, HK97, gp10; -	0
36	727845..728189	FIG00516578: hypothetical protein; -	0
37	728207..728803	PHAGE_Butyri_Arawn_NC_048848: hypothetical protein; -; phage(gi100011)	3.84e-41
38	728822..729241	PHAGE_Butyri_Arawn_NC_048848: hypothetical protein; -; phage(gi100012)	1.18e-07
39	complement(729435..729950)	hypothetical protein; -	0
40	730013..732691	PHAGE_Microb_Pikmin_NC_042119: hypothetical protein; -; phage(gi100017)	5.06e-98
41	732691..733383	PHAGE_Lactob_PLE2_NC_031036: hypothetical protein; -; phage(gi100016)	7.47e-22
42	733456..737322	PHAGE_Lactob_PLE2_NC_031036: hypothetical protein; -; phage(gi100017)	9.68e-72
43	737336..737758	PHAGE_Lactob_LpeD_NC_048677: hypothetical protein; -; phage(gi100022)	1.3e-21
44	737755..737973	hypothetical protein; -	0
45	738056..738523	PHAGE_Bacill_PfEFR_4_NC_048641: hypothetical protein; -; phage(gi100023)	2.42e-27
46	738523..739347	PHAGE_Propio_B3_NC_041892: hypothetical protein; -; phage(gi100025)	2.26e-73
47	739504..739911	Zinc-finger protein; -	0
48	739908..740096	hypothetical protein; -	0
49	740163..741416	PHAGE_Anoxyb_A403_NC_048701: tail length tape-measure protein; -; phage(gi100057)	1.92e-35
50	741413..742981	PHAGE_Lactoc_28201_NC_031013: methyltransferase type 11; -; phage(gi100001)	4.34e-28
51	755675..755686	attR	0
Region 3, total 29 CDS
#	CDS Position	BLAST Hit	E-Value
1	1609563..1610120	PHAGE_Arthro_vB_ArS_ArV2_NC_022972: tape measure protein; -; phage(gi563398126)	2.69e-06
2	complement(1610103..1610984)	PHAGE_Bacill_vB_BtS_B83_NC_048762: hypothetical protein; -; phage(gi100002)	1.98e-30
3	complement(1611283..1612941)	PHAGE_Thermu_OH2_NC_021784: SMF family protein; -; phage(gi526118339)	3.78e-21
4	complement(1612910..1613464)	PROPHAGE_Escher_Sakai: putative ATP-dependent protease; -; phage(gi15833954)	2.54e-39
5	complement(1613455..1614000)	PROPHAGE_Escher_Sakai: putative ATP-dependent protease; -; phage(gi15833954)	2.2e-23
6	complement(1613987..1614388)	UPF0102 protein YraN; -	0
7	complement(1614950..1615333)	PHAGE_Faecal_FP_Brigit_NC_047909: hypothetical protein; -; phage(gi100017)	1.39e-13
8	complement(1615421..1615870)	Phage terminase, small subunit; -	0
9	1615901..1616863	hypothetical protein; -	0
10	1617125..1617463	hypothetical protein; -	0
11	complement(1617594..1618058)	hypothetical protein; -	0
12	complement(1618055..1618786)	PHAGE_Coryne_SamW_NC_048069: HNH endonuclease; -; phage(gi100046)	7.32e-98
13	complement(1618776..1619420)	PHAGE_Coryne_Stiles_NC_048789: putative single-stranded DNA binding protein; -; phage(gi100050)	4.18e-103
14	complement(1619401..1619679)	PHAGE_Coryne_Lederberg_NC_048790: DNA helicase; -; phage(gi100044)	1.3e-19
15	complement(1619835..1620269)	PHAGE_Mycoba_Henu3_NC_051589: hypothetical protein; -; phage(gi100020)	1.43e-12
16	complement(1620305..1622083)	PHAGE_Lactob_phiadh_NC_000896: putative DNA-polymerase or DNA-primase; -; phage(gi9633023)	1.25e-25
17	complement(1622080..1622271)	PHAGE_Faecal_FP_Lagaffe_NC_047911: hypothetical protein; -; phage(gi100051)	5.78e-05
18	complement(1622243..1622530)	hypothetical protein; -	0
19	complement(1622527..1623294)	PHAGE_Staphy_37_NC_007055: ORF016; -; phage(gi66395745)	1.12e-53
20	1623450..1623926	hypothetical protein; -	0
21	1624022..1624282	hypothetical protein; -	0
22	complement(1624327..1624812)	PHAGE_Coryne_StAB_NC_048780: HNH endonuclease; -; phage(gi100046)	7.22e-51
23	complement(1624969..1625139)	PHAGE_Clostr_phiCT453A_NC_028991: hypothetical protein; -; phage(gi100018)	1.66e-21
24	complement(1625674..1626204)	PHAGE_Coryne_StAB_NC_048780: HNH endonuclease; -; phage(gi100046)	8.56e-43
25	complement(1626289..1626498)	hypothetical protein; -	0
26	complement(1626516..1627049)	PHAGE_Clostr_phiCT453A_NC_028991: hypothetical protein; -; phage(gi100017)	6.36e-67
27	complement(1627084..1628217)	PHAGE_Coryne_SamW_NC_048069: DNA adenine methyltransferase; -; phage(gi100041)	4.83e-140
28	complement(1628210..1628377)	PHAGE_Coryne_Stiles_NC_048789: hypothetical protein; -; phage(gi100042)	1.01e-10
29	complement(1628374..1628613)	hypothetical phage-associated protein; -	0
Region 4, total 25 CDS
#	CDS Position	BLAST Hit	E-Value
1	2113949..2113974	attL	0
2	complement(2126228..2127124)	PHAGE_Strept_Hiyaa_NC_048139: hypothetical protein; -; phage(gi100022)	4.3e-11
3	complement(2127154..2127312)	hypothetical protein; -	0
4	complement(2127321..2128523)	PHAGE_Gordon_Gsput1_NC_030932: hypothetical protein; -; phage(gi100018)	5.68e-65
5	complement(2128526..2128930)	hypothetical protein; -	0
6	complement(2128950..2129180)	hypothetical protein; -	0
7	2129201..2129623	hypothetical protein; -	0
8	complement(2129699..2130616)	PHAGE_Gordon_Schwabeltier_NC_031255: hypothetical protein; -; phage(gi100012)	4.48e-06
9	complement(2130619..2131002)	hypothetical protein; -	0
10	complement(2131002..2131280)	PHAGE_Arthro_DrManhattan_NC_048093: hypothetical protein; -; phage(gi100011)	1.15e-05
11	complement(2131293..2131616)	hypothetical protein; -	0
12	2131650..2131808	hypothetical protein; -	0
13	complement(2131999..2132127)	hypothetical protein; -	0
14	complement(2132187..2132495)	hypothetical protein; -	0
15	complement(2132508..2133428)	PHAGE_Coryne_StAB_NC_048780: hypothetical protein; -; phage(gi100006)	5.11e-89
16	complement(2133459..2133857)	PHAGE_Coryne_SamW_NC_048069: hypothetical protein; -; phage(gi100005)	5.57e-22
17	complement(2133873..2135189)	PHAGE_Gordon_Blueberry_NC_030943: hypothetical protein; -; phage(gi100004)	1.89e-44
18	complement(2135186..2135353)	PHAGE_Arthro_Vibaki_NC_049465: hypothetical protein; -; phage(gi100005)	1.19e-07
19	complement(2135353..2136681)	PHAGE_Coryne_Stiles_NC_048789: hypothetical protein; -; phage(gi100003)	1.04e-92
20	complement(2136703..2136861)	hypothetical protein; -	0
21	complement(2136874..2137425)	PHAGE_Gordon_Bowser_NC_030930: hypothetical protein; -; phage(gi100002)	1.27e-11
22	2137470..2138387	hypothetical protein; -	0
23	2138825..2139193	PHAGE_Gordon_Gsput1_NC_030932: hypothetical protein; -; phage(gi100028)	1.25e-15
24	2139210..2139608	PHAGE_Mycoba_MiaZeal_NC_028953: integrase; -; phage(gi971759993)	6.34e-17
25	2139652..2139677	attR	0
PO101/5
Total: 3 prophage regions have been identified, of which 0 regions are intact, 1 regions are incomplete, and 2 regions are questionable.
Region	Region Length	Completeness	Score	# Total Proteins	Region Position	Most Common Phage	GC %
1	38Kb	questionable	80	41	168000-206074	PHAGE_Gordon_Nyceirae_NC_031004(10)	0.5271
2	59.8Kb	questionable	90	50	695801-755649	PHAGE_Coryne_Lederberg_NC_048790(6)	0.5759
3	17.7Kb	incomplete	10	22	2121925-2139705	PHAGE_Coryne_StAB_NC_048780(4)	0.5481
Region 1, total 43 CDS
#	CDS Position	BLAST Hit	E-Value
1	168000..168048	attL	0
2	168284..168658	PHAGE_Mycoba_Xavia_NC_051740: hypothetical protein; -; phage(gi100039)	2.26e-21
3	168642..168956	hypothetical protein; -	0
4	complement(169097..169915)	PHAGE_Coryne_Poushou_NC_042139: endolysin; -; phage(gi100033)	1.31e-93
5	complement(169912..170322)	PHAGE_Coryne_Poushou_NC_042139: endolysin; -; phage(gi100033)	4.68e-09
6	complement(170444..170674)	PHAGE_Rhodoc_REQ2_NC_016652: hypothetical protein; -; phage(gi372449852)	1.27e-18
7	complement(170677..170946)	hypothetical protein; -	0
8	complement(171041..171448)	PHAGE_Coryne_Poushou_NC_042139: hypothetical protein; -; phage(gi100035)	9.88e-64
9	complement(171458..171949)	PHAGE_Coryne_Poushou_NC_042139: hypothetical protein; -; phage(gi100036)	5.69e-21
10	172069..172308	Transcriptional regulator; -	0
11	172356..172823	hypothetical protein; -	0
12	172893..173399	hypothetical protein; -	0
13	complement(173435..174337)	hypothetical protein; -	0
14	174395..174622	hypothetical protein; -	0
15	174638..175651	PHAGE_Mycoba_Willsammy_NC_051727: holin; -; phage(gi100034)	7.44e-61
16	175732..176490	PHAGE_Coryne_Poushou_NC_042139: recombination protein; -; phage(gi100049)	4.96e-25
17	176487..176903	PHAGE_Coryne_Poushou_NC_042139: putative single-stranded DNA binding protein; -; phage(gi100050)	8.96e-22
18	176931..177752	PHAGE_Coryne_Poushou_NC_042139: tail fiber protein; -; phage(gi100052)	3.54e-108
19	177874..178449	PHAGE_Coryne_Poushou_NC_042139: tail assembly protein; -; phage(gi100053)	2.38e-24
20	178554..178949	hypothetical protein; -	0
21	179074..179553	PHAGE_Gordon_Nyceirae_NC_031004: hypothetical protein; -; phage(gi100004)	5.21e-29
22	179537..180607	PHAGE_Gordon_Nyceirae_NC_031004: hypothetical protein; -; phage(gi100005)	1.75e-138
23	180582..181193	PHAGE_Gordon_Nyceirae_NC_031004: hypothetical protein; -; phage(gi100006)	1.96e-72
24	181193..181369	hypothetical protein; -	0
25	181412..182137	PHAGE_Rhodoc_Hiro_NC_048669: hypothetical protein; -; phage(gi100009)	3.56e-34
26	182134..182520	PHAGE_Mycoba_20ES_NC_023597: portal protein; -; phage(gi589892623)	1.82e-11
27	182539..184239	PHAGE_Gordon_Nyceirae_NC_031004: hypothetical protein; -; phage(gi100008)	1.84e-42
28	184236..184538	hypothetical protein; -	0
29	184615..185235	PHAGE_Mycoba_Benedict_NC_042331: hypothetical protein; -; phage(gi100012)	7.61e-05
30	185247..186236	PHAGE_Gordon_GMA1_NC_030902: hypothetical protein; -; phage(gi100006)	4.47e-123
31	186248..186547	PHAGE_Strept_Picard_NC_047794: hypothetical protein; -; phage(gi100008)	3.16e-05
32	186560..187027	hypothetical protein; -	0
33	187331..187651	PHAGE_Gordon_Nyceirae_NC_031004: hypothetical protein; -; phage(gi100016)	4.94e-22
34	187660..188103	PHAGE_Gordon_Nyceirae_NC_031004: hypothetical protein; -; phage(gi100017)	2.82e-13
35	188121..188273	hypothetical protein; -	0
36	188333..188962	PHAGE_Gordon_Nyceirae_NC_031004: hypothetical protein; -; phage(gi100018)	6.49e-12
37	189058..189411	hypothetical protein; -	0
38	189450..189860	PHAGE_Gordon_Nyceirae_NC_031004: hypothetical protein; -; phage(gi100020)	5.13e-12
39	189889..191337	PHAGE_Gordon_BritBrat_NC_030942: hypothetical protein; -; phage(gi100018)	5.15e-72
40	191334..192659	PHAGE_Gordon_Terrapin_NC_031001: hypothetical protein; -; phage(gi100022)	2.54e-33
41	192659..193570	PHAGE_Gordon_Splinter_NC_030927: hypothetical protein; -; phage(gi100020)	5.68e-25
42	193598..194533	PHAGE_Gordon_Obliviate_NC_031237: hypothetical protein; -; phage(gi100016)	2.36e-09
43	206074..206122	attR	0
Region 2, total 52 CDS
#	CDS Position	BLAST Hit	E-Value
1	695801..695812	attL	0
2	702120..702263	PHAGE_Clostr_CDKM9_NC_048642: tail fiber protein; -; phage(gi100052)	4.55e-09
3	702458..703051	hypothetical phage-associated protein; -	0
4	703153..703407	hypothetical protein; -	0
5	703404..703814	PHAGE_Coryne_Stiles_NC_048789: hypothetical protein; -; phage(gi100042)	3.31e-08
6	703807..704949	PHAGE_Coryne_SamW_NC_048069: DNA adenine methyltransferase; -; phage(gi100041)	1.1e-143
7	704955..705500	PHAGE_Coryne_SamW_NC_048069: hypothetical protein; -; phage(gi100042)	3.61e-72
8	705513..705710	hypothetical protein; -	0
9	705787..707754	PHAGE_Coryne_StAB_NC_048780: HNH endonuclease; -; phage(gi100046)	0
10	complement(707765..708589)	hypothetical protein; -	0
11	708848..709612	PHAGE_Staphy_37_NC_007055: ORF016; -; phage(gi66395745)	9.71e-52
12	709609..710052	PHAGE_Faecal_FP_Lagaffe_NC_047911: hypothetical protein; -; phage(gi100051)	1.1e-21
13	710049..712310	PHAGE_Lactob_T25_NC_048625: hypothetical protein; -; phage(gi100020)	2.37e-55
14	712453..712731	PHAGE_Coryne_Lederberg_NC_048790: DNA helicase; -; phage(gi100044)	4.45e-19
15	712712..714088	PHAGE_Coryne_Stiles_NC_048789: putative single-stranded DNA binding protein; -; phage(gi100050)	0
16	714076..714540	hypothetical phage-associated protein; -	0
17	complement(714623..715006)	hypothetical protein; -	0
18	715036..715179	hypothetical protein; -	0
19	715350..715925	Phage terminase, small subunit; -	0
20	716007..717191	PHAGE_Faecal_FP_Brigit_NC_047909: hypothetical protein; -; phage(gi100017)	9.31e-98
21	717163..718413	PHAGE_Faecal_FP_Epona_NC_047910: u-spanin; -; phage(gi100032)	3.9e-113
22	718559..718744	hypothetical protein; -	0
23	718741..719397	hypothetical protein; -	0
24	719394..719591	PHAGE_Bacill_SP_15_NC_031245: hypothetical protein; -; phage(gi100310)	4.92e-10
25	719687..720022	hypothetical protein; -	0
26	720218..720505	hypothetical protein; -	0
27	720677..720859	hypothetical protein; -	0
28	720973..722577	PHAGE_Gordon_Zirinka_NC_031097: hypothetical protein; -; phage(gi100002)	1.92e-105
29	722608..723204	hypothetical protein; -	0
30	723273..724589	PHAGE_Pseudo_phi2_NC_030931: hypothetical protein; -; phage(gi100031)	3.52e-83
31	724586..725464	PHAGE_Bacill_vB_BhaS_171_NC_030904: hypothetical protein; -; phage(gi100008)	5.35e-33
32	725483..726073	PHAGE_Burkho_KS9_NC_013055: major capsid protein gp5; -; phage(gi255033737)	2.94e-06
33	726070..726708	PHAGE_Azospi_Cd_NC_010355: Phage major capsid protein; -; phage(gi168495136)	3.43e-35
34	726730..727047	uncharacterized phage protein (possible DNA packaging); -	0
35	727158..727382	phage head-tail adaptor, putative; -	0
36	727385..727822	Phage protein, HK97, gp10; -	0
37	727819..728163	FIG00516578: hypothetical protein; -	0
38	728181..728777	PHAGE_Butyri_Arawn_NC_048848: hypothetical protein; -; phage(gi100011)	3.84e-41
39	728796..729215	PHAGE_Butyri_Arawn_NC_048848: hypothetical protein; -; phage(gi100012)	1.18e-07
40	complement(729409..729924)	hypothetical protein; -	0
41	729987..732665	PHAGE_Microb_Pikmin_NC_042119: hypothetical protein; -; phage(gi100017)	2.8e-98
42	732665..733357	PHAGE_Lactob_PLE2_NC_031036: hypothetical protein; -; phage(gi100016)	7.47e-22
43	733430..737296	PHAGE_Lactob_PLE2_NC_031036: hypothetical protein; -; phage(gi100017)	9.68e-72
44	737310..737732	PHAGE_Lactob_LpeD_NC_048677: hypothetical protein; -; phage(gi100022)	1.3e-21
45	737729..737947	hypothetical protein; -	0
46	738030..738497	PHAGE_Bacill_PfEFR_4_NC_048641: hypothetical protein; -; phage(gi100023)	2.42e-27
47	738497..739321	PHAGE_Propio_B3_NC_041892: hypothetical protein; -; phage(gi100025)	2.26e-73
48	739478..739885	Zinc-finger protein; -	0
49	739882..740070	hypothetical protein; -	0
50	740137..741390	PHAGE_Anoxyb_A403_NC_048701: tail length tape-measure protein; -; phage(gi100057)	1.92e-35
51	741387..742955	PHAGE_Lactoc_28201_NC_031013: methyltransferase type 11; -; phage(gi100001)	4.34e-28
52	755649..755660	attR	0
Region 3, total 24 CDS
#	CDS Position	BLAST Hit	E-Value
1	2121925..2121937	attL	0
2	complement(2126336..2127232)	PHAGE_Strept_Hiyaa_NC_048139: hypothetical protein; -; phage(gi100022)	4.3e-11
3	complement(2127262..2127420)	hypothetical protein; -	0
4	complement(2127429..2128631)	PHAGE_Gordon_Gsput1_NC_030932: hypothetical protein; -; phage(gi100018)	5.68e-65
5	complement(2128634..2129038)	hypothetical protein; -	0
6	complement(2129058..2129288)	hypothetical protein; -	0
7	2129309..2129731	hypothetical protein; -	0
8	complement(2129807..2130724)	PHAGE_Gordon_Schwabeltier_NC_031255: hypothetical protein; -; phage(gi100012)	4.48e-06
9	complement(2130727..2131110)	hypothetical protein; -	0
10	complement(2131110..2131388)	PHAGE_Arthro_DrManhattan_NC_048093: hypothetical protein; -; phage(gi100011)	1.15e-05
11	complement(2131401..2131712)	hypothetical protein; -	0
12	2131746..2131904	hypothetical protein; -	0
13	complement(2132095..2132223)	hypothetical protein; -	0
14	complement(2132283..2132591)	hypothetical protein; -	0
15	complement(2132604..2133524)	PHAGE_Coryne_StAB_NC_048780: hypothetical protein; -; phage(gi100006)	5.11e-89
16	complement(2133555..2133953)	PHAGE_Coryne_SamW_NC_048069: hypothetical protein; -; phage(gi100005)	5.57e-22
17	complement(2133969..2135285)	PHAGE_Gordon_Blueberry_NC_030943: hypothetical protein; -; phage(gi100004)	1.89e-44
18	complement(2135282..2135449)	PHAGE_Arthro_Vibaki_NC_049465: hypothetical protein; -; phage(gi100005)	1.19e-07
19	complement(2135430..2136779)	PHAGE_Coryne_Stiles_NC_048789: hypothetical protein; -; phage(gi100003)	1.51e-92
20	complement(2136801..2136959)	hypothetical protein; -	0
21	complement(2136972..2137523)	PHAGE_Gordon_Bowser_NC_030930: hypothetical protein; -; phage(gi100002)	1.27e-11
22	2137568..2138485	hypothetical protein; -	0
23	2138710..2138722	attR	0
24	2138923..2139705	PHAGE_Gordon_Gsput1_NC_030932: hypothetical protein; -; phage(gi100028)	5.01e-34
PO102/5
Total: 4 prophage regions have been identified, of which 0 regions are intact, 2 regions are incomplete, and 2 regions are questionable.
Region	Region Length	Completeness	Score	# Total Proteins	Region Position	Most Common Phage	GC %
1	38Kb	questionable	80	41	168002-206065	PHAGE_Gordon_Nyceirae_NC_031004(10)	0.5271
2	59.8Kb	questionable	70	49	695825-755674	PHAGE_Coryne_Lederberg_NC_048790(6)	0.5759
3	19Kb	incomplete	40	29	1609568-1628618	PHAGE_Coryne_Lederberg_NC_048790(6)	0.5867
4	25.7Kb	incomplete	20	23	2114022-2139725	PHAGE_Coryne_StAB_NC_048780(4)	0.54
Region 1, total 43 CDS
#	CDS Position	BLAST Hit	E-Value
1	168002..168050	attL	0
2	168275..168649	PHAGE_Mycoba_Xavia_NC_051740: hypothetical protein; -; phage(gi100039)	2.26e-21
3	168633..168947	hypothetical protein; -	0
4	complement(169088..169906)	PHAGE_Coryne_Poushou_NC_042139: endolysin; -; phage(gi100033)	1.31e-93
5	complement(169903..170313)	PHAGE_Coryne_Poushou_NC_042139: endolysin; -; phage(gi100033)	4.68e-09
6	complement(170435..170665)	PHAGE_Rhodoc_REQ2_NC_016652: hypothetical protein; -; phage(gi372449852)	1.27e-18
7	complement(170668..170937)	hypothetical protein; -	0
8	complement(171032..171439)	PHAGE_Coryne_Poushou_NC_042139: hypothetical protein; -; phage(gi100035)	9.88e-64
9	complement(171449..171940)	PHAGE_Coryne_Poushou_NC_042139: hypothetical protein; -; phage(gi100036)	5.69e-21
10	172060..172299	Transcriptional regulator; -	0
11	172347..172814	hypothetical protein; -	0
12	172884..173390	hypothetical protein; -	0
13	complement(173426..174328)	hypothetical protein; -	0
14	174386..174613	hypothetical protein; -	0
15	174629..175642	PHAGE_Mycoba_Willsammy_NC_051727: holin; -; phage(gi100034)	7.44e-61
16	175723..176481	PHAGE_Coryne_Poushou_NC_042139: recombination protein; -; phage(gi100049)	4.96e-25
17	176478..176894	PHAGE_Coryne_Poushou_NC_042139: putative single-stranded DNA binding protein; -; phage(gi100050)	8.96e-22
18	176922..177743	PHAGE_Coryne_Poushou_NC_042139: tail fiber protein; -; phage(gi100052)	3.54e-108
19	177865..178440	PHAGE_Coryne_Poushou_NC_042139: tail assembly protein; -; phage(gi100053)	2.38e-24
20	178545..178940	hypothetical protein; -	0
21	179065..179544	PHAGE_Gordon_Nyceirae_NC_031004: hypothetical protein; -; phage(gi100004)	5.21e-29
22	179528..180598	PHAGE_Gordon_Nyceirae_NC_031004: hypothetical protein; -; phage(gi100005)	1.75e-138
23	180573..181184	PHAGE_Gordon_Nyceirae_NC_031004: hypothetical protein; -; phage(gi100006)	1.96e-72
24	181184..181360	hypothetical protein; -	0
25	181403..182128	PHAGE_Rhodoc_Hiro_NC_048669: hypothetical protein; -; phage(gi100009)	3.56e-34
26	182125..182511	PHAGE_Mycoba_20ES_NC_023597: portal protein; -; phage(gi589892623)	1.82e-11
27	182530..184230	PHAGE_Gordon_Nyceirae_NC_031004: hypothetical protein; -; phage(gi100008)	1.84e-42
28	184227..184529	hypothetical protein; -	0
29	184606..185226	PHAGE_Mycoba_Benedict_NC_042331: hypothetical protein; -; phage(gi100012)	7.61e-05
30	185238..186227	PHAGE_Gordon_GMA1_NC_030902: hypothetical protein; -; phage(gi100006)	4.47e-123
31	186239..186538	PHAGE_Strept_Picard_NC_047794: hypothetical protein; -; phage(gi100008)	3.16e-05
32	186551..187018	hypothetical protein; -	0
33	187322..187642	PHAGE_Gordon_Nyceirae_NC_031004: hypothetical protein; -; phage(gi100016)	4.94e-22
34	187651..188094	PHAGE_Gordon_Nyceirae_NC_031004: hypothetical protein; -; phage(gi100017)	2.82e-13
35	188112..188264	hypothetical protein; -	0
36	188324..188953	PHAGE_Gordon_Nyceirae_NC_031004: hypothetical protein; -; phage(gi100018)	6.49e-12
37	189049..189402	hypothetical protein; -	0
38	189441..189851	PHAGE_Gordon_Nyceirae_NC_031004: hypothetical protein; -; phage(gi100020)	5.13e-12
39	189880..191328	PHAGE_Gordon_BritBrat_NC_030942: hypothetical protein; -; phage(gi100018)	5.15e-72
40	191325..192650	PHAGE_Gordon_Terrapin_NC_031001: hypothetical protein; -; phage(gi100022)	2.54e-33
41	192650..193561	PHAGE_Gordon_Splinter_NC_030927: hypothetical protein; -; phage(gi100020)	5.68e-25
42	193589..194524	PHAGE_Gordon_Obliviate_NC_031237: hypothetical protein; -; phage(gi100016)	2.36e-09
43	206065..206113	attR	0
Region 2, total 51 CDS
#	CDS Position	BLAST Hit	E-Value
1	695825..695836	attL	0
2	702144..702287	PHAGE_Clostr_CDKM9_NC_048642: tail fiber protein; -; phage(gi100052)	4.55e-09
3	702482..703075	hypothetical phage-associated protein; -	0
4	703177..703431	hypothetical protein; -	0
5	703428..703838	PHAGE_Coryne_Stiles_NC_048789: hypothetical protein; -; phage(gi100042)	3.31e-08
6	703831..704973	PHAGE_Coryne_SamW_NC_048069: DNA adenine methyltransferase; -; phage(gi100041)	1.1e-143
7	704979..705524	PHAGE_Coryne_SamW_NC_048069: hypothetical protein; -; phage(gi100042)	3.61e-72
8	705537..705734	hypothetical protein; -	0
9	705811..707778	PHAGE_Coryne_StAB_NC_048780: HNH endonuclease; -; phage(gi100046)	0
10	complement(707789..708613)	hypothetical protein; -	0
11	708872..709636	PHAGE_Staphy_37_NC_007055: ORF016; -; phage(gi66395745)	9.71e-52
12	709633..710076	PHAGE_Faecal_FP_Lagaffe_NC_047911: hypothetical protein; -; phage(gi100051)	1.1e-21
13	710073..712334	PHAGE_Lactob_A2_NC_004112: putative primase; -; phage(gi22296557)	5.93e-59
14	712477..712755	PHAGE_Coryne_Lederberg_NC_048790: DNA helicase; -; phage(gi100044)	4.45e-19
15	712736..714112	PHAGE_Coryne_Stiles_NC_048789: putative single-stranded DNA binding protein; -; phage(gi100050)	0
16	714100..714564	hypothetical phage-associated protein; -	0
17	complement(714647..715030)	hypothetical protein; -	0
18	715060..715203	hypothetical protein; -	0
19	715374..715949	Phage terminase, small subunit; -	0
20	716031..717215	PHAGE_Faecal_FP_Brigit_NC_047909: hypothetical protein; -; phage(gi100017)	9.31e-98
21	717187..718437	PHAGE_Faecal_FP_Epona_NC_047910: u-spanin; -; phage(gi100032)	3.9e-113
22	718583..718768	hypothetical protein; -	0
23	718765..719421	hypothetical protein; -	0
24	719418..719615	PHAGE_Bacill_SP_15_NC_031245: hypothetical protein; -; phage(gi100310)	4.92e-10
25	719711..720046	hypothetical protein; -	0
26	720242..720529	hypothetical protein; -	0
27	720701..720883	hypothetical protein; -	0
28	720997..722601	PHAGE_Gordon_Zirinka_NC_031097: hypothetical protein; -; phage(gi100002)	1.92e-105
29	722632..723228	hypothetical protein; -	0
30	723297..724613	PHAGE_Pseudo_phi2_NC_030931: hypothetical protein; -; phage(gi100031)	3.52e-83
31	724610..725488	PHAGE_Bacill_vB_BhaS_171_NC_030904: hypothetical protein; -; phage(gi100008)	5.35e-33
32	725507..726733	PHAGE_Salmon_118970_sal3_NC_031940: hypothetical protein; -; phage(gi100008)	8.77e-41
33	726755..727072	uncharacterized phage protein (possible DNA packaging); -	0
34	727183..727407	phage head-tail adaptor, putative; -	0
35	727410..727847	Phage protein, HK97, gp10; -	0
36	727844..728188	FIG00516578: hypothetical protein; -	0
37	728206..728802	PHAGE_Butyri_Arawn_NC_048848: hypothetical protein; -; phage(gi100011)	3.84e-41
38	728821..729240	PHAGE_Butyri_Arawn_NC_048848: hypothetical protein; -; phage(gi100012)	1.18e-07
39	complement(729434..729949)	hypothetical protein; -	0
40	730012..732690	PHAGE_Microb_Pikmin_NC_042119: hypothetical protein; -; phage(gi100017)	5.06e-98
41	732690..733382	PHAGE_Lactob_PLE2_NC_031036: hypothetical protein; -; phage(gi100016)	7.47e-22
42	733455..737321	PHAGE_Lactob_PLE2_NC_031036: hypothetical protein; -; phage(gi100017)	9.68e-72
43	737335..737757	PHAGE_Lactob_LpeD_NC_048677: hypothetical protein; -; phage(gi100022)	1.3e-21
44	737754..737972	hypothetical protein; -	0
45	738055..738522	PHAGE_Bacill_PfEFR_4_NC_048641: hypothetical protein; -; phage(gi100023)	2.42e-27
46	738522..739346	PHAGE_Propio_B3_NC_041892: hypothetical protein; -; phage(gi100025)	2.26e-73
47	739503..739910	Zinc-finger protein; -	0
48	739907..740095	hypothetical protein; -	0
49	740162..741415	PHAGE_Anoxyb_A403_NC_048701: tail length tape-measure protein; -; phage(gi100057)	1.92e-35
50	741412..742980	PHAGE_Lactoc_28201_NC_031013: methyltransferase type 11; -; phage(gi100001)	4.34e-28
51	755674..755685	attR	0
Region 3, total 29 CDS
#	CDS Position	BLAST Hit	E-Value
1	1609568..1610125	PHAGE_Arthro_vB_ArS_ArV2_NC_022972: tape measure protein; -; phage(gi563398126)	2.69e-06
2	complement(1610108..1610989)	PHAGE_Bacill_vB_BtS_B83_NC_048762: hypothetical protein; -; phage(gi100002)	1.98e-30
3	complement(1611288..1612946)	PHAGE_Thermu_OH2_NC_021784: SMF family protein; -; phage(gi526118339)	3.78e-21
4	complement(1612915..1613469)	PROPHAGE_Escher_Sakai: putative ATP-dependent protease; -; phage(gi15833954)	2.54e-39
5	complement(1613460..1614005)	PROPHAGE_Escher_Sakai: putative ATP-dependent protease; -; phage(gi15833954)	2.2e-23
6	complement(1613992..1614393)	UPF0102 protein YraN; -	0
7	complement(1614955..1615338)	PHAGE_Faecal_FP_Brigit_NC_047909: hypothetical protein; -; phage(gi100017)	1.39e-13
8	complement(1615426..1615875)	Phage terminase, small subunit; -	0
9	1615906..1616868	hypothetical protein; -	0
10	1617130..1617468	hypothetical protein; -	0
11	complement(1617599..1618063)	hypothetical protein; -	0
12	complement(1618060..1618791)	PHAGE_Coryne_SamW_NC_048069: HNH endonuclease; -; phage(gi100046)	7.32e-98
13	complement(1618781..1619425)	PHAGE_Coryne_Stiles_NC_048789: putative single-stranded DNA binding protein; -; phage(gi100050)	4.18e-103
14	complement(1619406..1619684)	PHAGE_Coryne_Lederberg_NC_048790: DNA helicase; -; phage(gi100044)	1.3e-19
15	complement(1619840..1620274)	PHAGE_Mycoba_Henu3_NC_051589: hypothetical protein; -; phage(gi100020)	1.43e-12
16	complement(1620310..1622088)	PHAGE_Lactob_phiadh_NC_000896: putative DNA-polymerase or DNA-primase; -; phage(gi9633023)	1.25e-25
17	complement(1622085..1622276)	PHAGE_Faecal_FP_Lagaffe_NC_047911: hypothetical protein; -; phage(gi100051)	5.78e-05
18	complement(1622248..1622535)	hypothetical protein; -	0
19	complement(1622532..1623299)	PHAGE_Staphy_37_NC_007055: ORF016; -; phage(gi66395745)	1.12e-53
20	1623455..1623931	hypothetical protein; -	0
21	1624027..1624287	hypothetical protein; -	0
22	complement(1624332..1624817)	PHAGE_Coryne_StAB_NC_048780: HNH endonuclease; -; phage(gi100046)	7.22e-51
23	complement(1624974..1625144)	PHAGE_Clostr_phiCT453A_NC_028991: hypothetical protein; -; phage(gi100018)	1.66e-21
24	complement(1625679..1626209)	PHAGE_Coryne_StAB_NC_048780: HNH endonuclease; -; phage(gi100046)	8.56e-43
25	complement(1626294..1626503)	hypothetical protein; -	0
26	complement(1626521..1627054)	PHAGE_Clostr_phiCT453A_NC_028991: hypothetical protein; -; phage(gi100017)	6.36e-67
27	complement(1627089..1628222)	PHAGE_Coryne_SamW_NC_048069: DNA adenine methyltransferase; -; phage(gi100041)	4.83e-140
28	complement(1628215..1628382)	PHAGE_Coryne_Stiles_NC_048789: hypothetical protein; -; phage(gi100042)	1.01e-10
29	complement(1628379..1628618)	hypothetical phage-associated protein; -	0
Region 4, total 25 CDS
#	CDS Position	BLAST Hit	E-Value
1	2114022..2114047	attL	0
2	complement(2126301..2127197)	PHAGE_Strept_Hiyaa_NC_048139: hypothetical protein; -; phage(gi100022)	4.3e-11
3	complement(2127227..2127385)	hypothetical protein; -	0
4	complement(2127394..2128617)	PHAGE_Gordon_Gsput1_NC_030932: hypothetical protein; -; phage(gi100018)	7.56e-65
5	complement(2128599..2129003)	hypothetical protein; -	0
6	complement(2129023..2129253)	hypothetical protein; -	0
7	2129274..2129696	hypothetical protein; -	0
8	complement(2129772..2130689)	PHAGE_Gordon_Schwabeltier_NC_031255: hypothetical protein; -; phage(gi100012)	4.48e-06
9	complement(2130692..2131075)	hypothetical protein; -	0
10	complement(2131075..2131353)	PHAGE_Arthro_DrManhattan_NC_048093: hypothetical protein; -; phage(gi100011)	1.15e-05
11	complement(2131366..2131689)	hypothetical protein; -	0
12	2131720..2131881	hypothetical protein; -	0
13	complement(2132072..2132200)	hypothetical protein; -	0
14	complement(2132260..2132568)	hypothetical protein; -	0
15	complement(2132581..2133501)	PHAGE_Coryne_StAB_NC_048780: hypothetical protein; -; phage(gi100006)	5.11e-89
16	complement(2133532..2133930)	PHAGE_Coryne_SamW_NC_048069: hypothetical protein; -; phage(gi100005)	5.57e-22
17	complement(2133946..2135262)	PHAGE_Gordon_Blueberry_NC_030943: hypothetical protein; -; phage(gi100004)	1.89e-44
18	complement(2135259..2135426)	PHAGE_Arthro_Vibaki_NC_049465: hypothetical protein; -; phage(gi100005)	1.19e-07
19	complement(2135426..2136754)	PHAGE_Coryne_Stiles_NC_048789: hypothetical protein; -; phage(gi100003)	1.04e-92
20	complement(2136776..2136916)	hypothetical protein; -	0
21	complement(2136947..2137498)	PHAGE_Gordon_Bowser_NC_030930: hypothetical protein; -; phage(gi100002)	1.27e-11
22	2137543..2138460	hypothetical protein; -	0
23	2138898..2139266	PHAGE_Gordon_Gsput1_NC_030932: hypothetical protein; -; phage(gi100028)	1.25e-15
24	2139283..2139681	PHAGE_Mycoba_MiaZeal_NC_028953: integrase; -; phage(gi971759993)	6.34e-17
25	2139725..2139750	attR	0
PO104/5
Total: 4 prophage regions have been identified, of which 0 regions are intact, 2 regions are incomplete, and 2 regions are questionable.
Region	Region Length	Completeness	Score	# Total Proteins	Region Position	Most Common Phage	GC %
1	38Kb	questionable	80	41	168000-206074	PHAGE_Gordon_Nyceirae_NC_031004(10)	0.5271
2	59.8Kb	questionable	90	50	695801-755649	PHAGE_Coryne_Lederberg_NC_048790(6)	0.5759
3	19Kb	incomplete	40	30	1609585-1628636	PHAGE_Coryne_Lederberg_NC_048790(6)	0.5867
4	17.7Kb	incomplete	10	24	2121832-2139612	PHAGE_Coryne_StAB_NC_048780(4)	0.5481
Region 1, total 43 CDS
#	CDS Position	BLAST Hit	E-Value
1	168000..168048	attL	0
2	168284..168658	PHAGE_Mycoba_Xavia_NC_051740: hypothetical protein; -; phage(gi100039)	2.26e-21
3	168642..168956	hypothetical protein; -	0
4	complement(169097..169915)	PHAGE_Coryne_Poushou_NC_042139: endolysin; -; phage(gi100033)	1.31e-93
5	complement(169912..170322)	PHAGE_Coryne_Poushou_NC_042139: endolysin; -; phage(gi100033)	4.68e-09
6	complement(170444..170674)	PHAGE_Rhodoc_REQ2_NC_016652: hypothetical protein; -; phage(gi372449852)	1.27e-18
7	complement(170677..170946)	hypothetical protein; -	0
8	complement(171041..171448)	PHAGE_Coryne_Poushou_NC_042139: hypothetical protein; -; phage(gi100035)	9.88e-64
9	complement(171458..171949)	PHAGE_Coryne_Poushou_NC_042139: hypothetical protein; -; phage(gi100036)	5.69e-21
10	172069..172308	Transcriptional regulator; -	0
11	172356..172823	hypothetical protein; -	0
12	172893..173399	hypothetical protein; -	0
13	complement(173435..174337)	hypothetical protein; -	0
14	174395..174622	hypothetical protein; -	0
15	174638..175651	PHAGE_Mycoba_Willsammy_NC_051727: holin; -; phage(gi100034)	7.44e-61
16	175732..176490	PHAGE_Coryne_Poushou_NC_042139: recombination protein; -; phage(gi100049)	4.96e-25
17	176487..176903	PHAGE_Coryne_Poushou_NC_042139: putative single-stranded DNA binding protein; -; phage(gi100050)	8.96e-22
18	176931..177752	PHAGE_Coryne_Poushou_NC_042139: tail fiber protein; -; phage(gi100052)	3.54e-108
19	177874..178449	PHAGE_Coryne_Poushou_NC_042139: tail assembly protein; -; phage(gi100053)	2.38e-24
20	178554..178949	hypothetical protein; -	0
21	179074..179553	PHAGE_Gordon_Nyceirae_NC_031004: hypothetical protein; -; phage(gi100004)	5.21e-29
22	179537..180607	PHAGE_Gordon_Nyceirae_NC_031004: hypothetical protein; -; phage(gi100005)	1.75e-138
23	180582..181193	PHAGE_Gordon_Nyceirae_NC_031004: hypothetical protein; -; phage(gi100006)	1.96e-72
24	181193..181369	hypothetical protein; -	0
25	181412..182137	PHAGE_Rhodoc_Hiro_NC_048669: hypothetical protein; -; phage(gi100009)	3.56e-34
26	182134..182520	PHAGE_Mycoba_20ES_NC_023597: portal protein; -; phage(gi589892623)	1.82e-11
27	182539..184239	PHAGE_Gordon_Nyceirae_NC_031004: hypothetical protein; -; phage(gi100008)	1.84e-42
28	184236..184538	hypothetical protein; -	0
29	184615..185235	PHAGE_Mycoba_Benedict_NC_042331: hypothetical protein; -; phage(gi100012)	7.61e-05
30	185247..186236	PHAGE_Gordon_GMA1_NC_030902: hypothetical protein; -; phage(gi100006)	4.47e-123
31	186248..186547	PHAGE_Strept_Picard_NC_047794: hypothetical protein; -; phage(gi100008)	3.16e-05
32	186560..187027	hypothetical protein; -	0
33	187331..187651	PHAGE_Gordon_Nyceirae_NC_031004: hypothetical protein; -; phage(gi100016)	4.94e-22
34	187660..188103	PHAGE_Gordon_Nyceirae_NC_031004: hypothetical protein; -; phage(gi100017)	2.82e-13
35	188121..188273	hypothetical protein; -	0
36	188333..188962	PHAGE_Gordon_Nyceirae_NC_031004: hypothetical protein; -; phage(gi100018)	6.49e-12
37	189058..189411	hypothetical protein; -	0
38	189450..189860	PHAGE_Gordon_Nyceirae_NC_031004: hypothetical protein; -; phage(gi100020)	5.13e-12
39	189889..191337	PHAGE_Gordon_BritBrat_NC_030942: hypothetical protein; -; phage(gi100018)	5.15e-72
40	191334..192659	PHAGE_Gordon_Terrapin_NC_031001: hypothetical protein; -; phage(gi100022)	2.54e-33
41	192659..193570	PHAGE_Gordon_Splinter_NC_030927: hypothetical protein; -; phage(gi100020)	5.68e-25
42	193598..194533	PHAGE_Gordon_Obliviate_NC_031237: hypothetical protein; -; phage(gi100016)	2.36e-09
43	206074..206122	attR	0
Region 2, total 52 CDS
#	CDS Position	BLAST Hit	E-Value
1	695801..695812	attL	0
2	702120..702263	PHAGE_Clostr_CDKM9_NC_048642: tail fiber protein; -; phage(gi100052)	4.55e-09
3	702458..703051	hypothetical phage-associated protein; -	0
4	703153..703407	hypothetical protein; -	0
5	703404..703814	PHAGE_Coryne_Stiles_NC_048789: hypothetical protein; -; phage(gi100042)	3.31e-08
6	703807..704949	PHAGE_Coryne_SamW_NC_048069: DNA adenine methyltransferase; -; phage(gi100041)	1.1e-143
7	704955..705500	PHAGE_Coryne_SamW_NC_048069: hypothetical protein; -; phage(gi100042)	3.61e-72
8	705513..705710	hypothetical protein; -	0
9	705787..707754	PHAGE_Coryne_StAB_NC_048780: HNH endonuclease; -; phage(gi100046)	0
10	complement(707765..708589)	hypothetical protein; -	0
11	708848..709612	PHAGE_Staphy_37_NC_007055: ORF016; -; phage(gi66395745)	9.71e-52
12	709609..710052	PHAGE_Faecal_FP_Lagaffe_NC_047911: hypothetical protein; -; phage(gi100051)	1.1e-21
13	710049..712310	PHAGE_Lactob_T25_NC_048625: hypothetical protein; -; phage(gi100020)	2.37e-55
14	712453..712731	PHAGE_Coryne_Lederberg_NC_048790: DNA helicase; -; phage(gi100044)	4.45e-19
15	712712..714088	PHAGE_Coryne_Stiles_NC_048789: putative single-stranded DNA binding protein; -; phage(gi100050)	0
16	714076..714540	hypothetical phage-associated protein; -	0
17	complement(714623..715006)	hypothetical protein; -	0
18	715036..715179	hypothetical protein; -	0
19	715350..715925	Phage terminase, small subunit; -	0
20	716007..717191	PHAGE_Faecal_FP_Brigit_NC_047909: hypothetical protein; -; phage(gi100017)	9.31e-98
21	717163..718413	PHAGE_Faecal_FP_Epona_NC_047910: u-spanin; -; phage(gi100032)	3.9e-113
22	718559..718744	hypothetical protein; -	0
23	718741..719397	hypothetical protein; -	0
24	719394..719591	PHAGE_Bacill_SP_15_NC_031245: hypothetical protein; -; phage(gi100310)	4.92e-10
25	719687..720022	hypothetical protein; -	0
26	720218..720505	hypothetical protein; -	0
27	720677..720859	hypothetical protein; -	0
28	720973..722577	PHAGE_Gordon_Zirinka_NC_031097: hypothetical protein; -; phage(gi100002)	1.92e-105
29	722608..723204	hypothetical protein; -	0
30	723273..724589	PHAGE_Pseudo_phi2_NC_030931: hypothetical protein; -; phage(gi100031)	3.52e-83
31	724586..725464	PHAGE_Bacill_vB_BhaS_171_NC_030904: hypothetical protein; -; phage(gi100008)	5.35e-33
32	725483..726073	PHAGE_Burkho_KS9_NC_013055: major capsid protein gp5; -; phage(gi255033737)	2.94e-06
33	726070..726708	PHAGE_Azospi_Cd_NC_010355: Phage major capsid protein; -; phage(gi168495136)	3.43e-35
34	726730..727047	uncharacterized phage protein (possible DNA packaging); -	0
35	727158..727382	phage head-tail adaptor, putative; -	0
36	727385..727822	Phage protein, HK97, gp10; -	0
37	727819..728163	FIG00516578: hypothetical protein; -	0
38	728181..728777	PHAGE_Butyri_Arawn_NC_048848: hypothetical protein; -; phage(gi100011)	3.84e-41
39	728796..729215	PHAGE_Butyri_Arawn_NC_048848: hypothetical protein; -; phage(gi100012)	1.18e-07
40	complement(729409..729924)	hypothetical protein; -	0
41	729987..732665	PHAGE_Microb_Pikmin_NC_042119: hypothetical protein; -; phage(gi100017)	2.8e-98
42	732665..733357	PHAGE_Lactob_PLE2_NC_031036: hypothetical protein; -; phage(gi100016)	7.47e-22
43	733430..737296	PHAGE_Lactob_PLE2_NC_031036: hypothetical protein; -; phage(gi100017)	9.68e-72
44	737310..737732	PHAGE_Lactob_LpeD_NC_048677: hypothetical protein; -; phage(gi100022)	1.3e-21
45	737729..737947	hypothetical protein; -	0
46	738030..738497	PHAGE_Bacill_PfEFR_4_NC_048641: hypothetical protein; -; phage(gi100023)	2.42e-27
47	738497..739321	PHAGE_Propio_B3_NC_041892: hypothetical protein; -; phage(gi100025)	2.26e-73
48	739478..739885	Zinc-finger protein; -	0
49	739882..740070	hypothetical protein; -	0
50	740137..741390	PHAGE_Anoxyb_A403_NC_048701: tail length tape-measure protein; -; phage(gi100057)	1.92e-35
51	741387..742955	PHAGE_Lactoc_28201_NC_031013: methyltransferase type 11; -; phage(gi100001)	4.34e-28
52	755649..755660	attR	0
Region 3, total 30 CDS
#	CDS Position	BLAST Hit	E-Value
1	1609585..1610142	PHAGE_Arthro_vB_ArS_ArV2_NC_022972: tape measure protein; -; phage(gi563398126)	2.69e-06
2	complement(1610125..1611006)	PHAGE_Bacill_vB_BtS_B83_NC_048762: hypothetical protein; -; phage(gi100002)	1.98e-30
3	complement(1611305..1612963)	PHAGE_Thermu_OH2_NC_021784: SMF family protein; -; phage(gi526118339)	3.78e-21
4	complement(1612932..1613486)	PROPHAGE_Escher_Sakai: putative ATP-dependent protease; -; phage(gi15833954)	2.54e-39
5	complement(1613477..1613773)	MG(2+) CHELATASE FAMILY PROTEIN / ComM-related protein; -	0
6	complement(1613823..1614023)	PROPHAGE_Escher_Sakai: putative ATP-dependent protease; -; phage(gi15833954)	5.06e-10
7	complement(1614010..1614411)	UPF0102 protein YraN; -	0
8	complement(1614973..1615356)	PHAGE_Faecal_FP_Brigit_NC_047909: hypothetical protein; -; phage(gi100017)	1.39e-13
9	complement(1615444..1615893)	Phage terminase, small subunit; -	0
10	1615924..1616886	hypothetical protein; -	0
11	1617148..1617486	hypothetical protein; -	0
12	complement(1617617..1618081)	hypothetical protein; -	0
13	complement(1618078..1618809)	PHAGE_Coryne_SamW_NC_048069: HNH endonuclease; -; phage(gi100046)	7.32e-98
14	complement(1618799..1619443)	PHAGE_Coryne_Stiles_NC_048789: putative single-stranded DNA binding protein; -; phage(gi100050)	4.18e-103
15	complement(1619424..1619702)	PHAGE_Coryne_Lederberg_NC_048790: DNA helicase; -; phage(gi100044)	1.3e-19
16	complement(1619858..1620292)	PHAGE_Mycoba_Henu3_NC_051589: hypothetical protein; -; phage(gi100020)	1.43e-12
17	complement(1620328..1622106)	PHAGE_Lactob_phiadh_NC_000896: putative DNA-polymerase or DNA-primase; -; phage(gi9633023)	1.25e-25
18	complement(1622103..1622294)	PHAGE_Faecal_FP_Lagaffe_NC_047911: hypothetical protein; -; phage(gi100051)	5.78e-05
19	complement(1622266..1622553)	hypothetical protein; -	0
20	complement(1622550..1623317)	PHAGE_Staphy_37_NC_007055: ORF016; -; phage(gi66395745)	1.12e-53
21	1623473..1623949	hypothetical protein; -	0
22	1624045..1624305	hypothetical protein; -	0
23	complement(1624350..1624835)	PHAGE_Coryne_StAB_NC_048780: HNH endonuclease; -; phage(gi100046)	7.22e-51
24	complement(1624992..1625162)	PHAGE_Clostr_phiCT453A_NC_028991: hypothetical protein; -; phage(gi100018)	1.66e-21
25	complement(1625697..1626227)	PHAGE_Coryne_StAB_NC_048780: HNH endonuclease; -; phage(gi100046)	8.56e-43
26	complement(1626312..1626521)	hypothetical protein; -	0
27	complement(1626539..1627072)	PHAGE_Clostr_phiCT453A_NC_028991: hypothetical protein; -; phage(gi100017)	6.36e-67
28	complement(1627107..1628240)	PHAGE_Coryne_SamW_NC_048069: DNA adenine methyltransferase; -; phage(gi100041)	4.83e-140
29	complement(1628233..1628400)	PHAGE_Coryne_Stiles_NC_048789: hypothetical protein; -; phage(gi100042)	1.01e-10
30	complement(1628397..1628636)	hypothetical phage-associated protein; -	0
Region 4, total 26 CDS
#	CDS Position	BLAST Hit	E-Value
1	2121832..2121844	attL	0
2	complement(2125063..2125215)	PHAGE_Rhodoc_ReqiPine5_NC_023722: tape measure protein; -; phage(gi593778368)	1.83e-07
3	complement(2125351..2126070)	PHAGE_Mycoba_Findley_NC_051598: hypothetical protein; -; phage(gi100018)	1.02e-21
4	complement(2126243..2127139)	PHAGE_Strept_Hiyaa_NC_048139: hypothetical protein; -; phage(gi100022)	4.3e-11
5	complement(2127169..2127327)	hypothetical protein; -	0
6	complement(2127336..2128559)	PHAGE_Gordon_Gsput1_NC_030932: hypothetical protein; -; phage(gi100018)	7.56e-65
7	complement(2128541..2128945)	hypothetical protein; -	0
8	complement(2128965..2129195)	hypothetical protein; -	0
9	2129216..2129638	hypothetical protein; -	0
10	complement(2129714..2130631)	PHAGE_Gordon_Schwabeltier_NC_031255: hypothetical protein; -; phage(gi100012)	4.48e-06
11	complement(2130634..2131017)	hypothetical protein; -	0
12	complement(2131017..2131295)	PHAGE_Arthro_DrManhattan_NC_048093: hypothetical protein; -; phage(gi100011)	1.15e-05
13	complement(2131308..2131619)	hypothetical protein; -	0
14	2131650..2131811	hypothetical protein; -	0
15	complement(2132002..2132130)	hypothetical protein; -	0
16	complement(2132190..2132498)	hypothetical protein; -	0
17	complement(2132511..2133431)	PHAGE_Coryne_StAB_NC_048780: hypothetical protein; -; phage(gi100006)	5.11e-89
18	complement(2133462..2133860)	PHAGE_Coryne_SamW_NC_048069: hypothetical protein; -; phage(gi100005)	5.57e-22
19	complement(2133876..2135192)	PHAGE_Gordon_Blueberry_NC_030943: hypothetical protein; -; phage(gi100004)	1.89e-44
20	complement(2135189..2135356)	PHAGE_Arthro_Vibaki_NC_049465: hypothetical protein; -; phage(gi100005)	1.19e-07
21	complement(2135337..2136686)	PHAGE_Coryne_Stiles_NC_048789: hypothetical protein; -; phage(gi100003)	1.51e-92
22	complement(2136708..2136848)	hypothetical protein; -	0
23	complement(2136879..2137430)	PHAGE_Gordon_Bowser_NC_030930: hypothetical protein; -; phage(gi100002)	1.27e-11
24	2137475..2138392	hypothetical protein; -	0
25	2138617..2138629	attR	0
26	2138830..2139612	PHAGE_Gordon_Gsput1_NC_030932: hypothetical protein; -; phage(gi100028)	5.01e-34
PO105/5
Total: 4 prophage regions have been identified, of which 0 regions are intact, 2 regions are incomplete, and 2 regions are questionable.
Region	Region Length	Completeness	Score	# Total Proteins	Region Position	Most Common Phage	GC %
1	38Kb	questionable	80	41	168000-206074	PHAGE_Gordon_Nyceirae_NC_031004(10)	0.5271
2	59.8Kb	questionable	90	50	695803-755651	PHAGE_Coryne_Lederberg_NC_048790(6)	0.5759
3	19Kb	incomplete	40	30	1609533-1628584	PHAGE_Coryne_Lederberg_NC_048790(6)	0.5867
4	17.7Kb	incomplete	10	21	2121779-2139558	PHAGE_Coryne_SamW_NC_048069(4)	0.548
Region 1, total 43 CDS
#	CDS Position	BLAST Hit	E-Value
1	168000..168048	attL	0
2	168284..168658	PHAGE_Mycoba_Xavia_NC_051740: hypothetical protein; -; phage(gi100039)	2.26e-21
3	168642..168956	hypothetical protein; -	0
4	complement(169097..169915)	PHAGE_Coryne_Poushou_NC_042139: endolysin; -; phage(gi100033)	1.31e-93
5	complement(169912..170322)	PHAGE_Coryne_Poushou_NC_042139: endolysin; -; phage(gi100033)	4.68e-09
6	complement(170444..170674)	PHAGE_Rhodoc_REQ2_NC_016652: hypothetical protein; -; phage(gi372449852)	1.27e-18
7	complement(170677..170946)	hypothetical protein; -	0
8	complement(171041..171448)	PHAGE_Coryne_Poushou_NC_042139: hypothetical protein; -; phage(gi100035)	9.88e-64
9	complement(171458..171949)	PHAGE_Coryne_Poushou_NC_042139: hypothetical protein; -; phage(gi100036)	5.69e-21
10	172069..172308	Transcriptional regulator; -	0
11	172356..172823	hypothetical protein; -	0
12	172893..173399	hypothetical protein; -	0
13	complement(173435..174337)	hypothetical protein; -	0
14	174395..174622	hypothetical protein; -	0
15	174638..175651	PHAGE_Mycoba_Willsammy_NC_051727: holin; -; phage(gi100034)	7.44e-61
16	175732..176490	PHAGE_Coryne_Poushou_NC_042139: recombination protein; -; phage(gi100049)	4.96e-25
17	176487..176903	PHAGE_Coryne_Poushou_NC_042139: putative single-stranded DNA binding protein; -; phage(gi100050)	8.96e-22
18	176931..177752	PHAGE_Coryne_Poushou_NC_042139: tail fiber protein; -; phage(gi100052)	3.54e-108
19	177874..178449	PHAGE_Coryne_Poushou_NC_042139: tail assembly protein; -; phage(gi100053)	2.38e-24
20	178554..178949	hypothetical protein; -	0
21	179074..179553	PHAGE_Gordon_Nyceirae_NC_031004: hypothetical protein; -; phage(gi100004)	5.21e-29
22	179537..180607	PHAGE_Gordon_Nyceirae_NC_031004: hypothetical protein; -; phage(gi100005)	1.75e-138
23	180582..181193	PHAGE_Gordon_Nyceirae_NC_031004: hypothetical protein; -; phage(gi100006)	1.96e-72
24	181193..181369	hypothetical protein; -	0
25	181412..182137	PHAGE_Rhodoc_Hiro_NC_048669: hypothetical protein; -; phage(gi100009)	3.56e-34
26	182134..182520	PHAGE_Mycoba_20ES_NC_023597: portal protein; -; phage(gi589892623)	1.82e-11
27	182539..184239	PHAGE_Gordon_Nyceirae_NC_031004: hypothetical protein; -; phage(gi100008)	1.84e-42
28	184236..184538	hypothetical protein; -	0
29	184615..185235	PHAGE_Mycoba_Benedict_NC_042331: hypothetical protein; -; phage(gi100012)	7.61e-05
30	185247..186236	PHAGE_Gordon_GMA1_NC_030902: hypothetical protein; -; phage(gi100006)	4.47e-123
31	186248..186547	PHAGE_Strept_Picard_NC_047794: hypothetical protein; -; phage(gi100008)	3.16e-05
32	186560..187027	hypothetical protein; -	0
33	187331..187651	PHAGE_Gordon_Nyceirae_NC_031004: hypothetical protein; -; phage(gi100016)	4.94e-22
34	187660..188103	PHAGE_Gordon_Nyceirae_NC_031004: hypothetical protein; -; phage(gi100017)	2.82e-13
35	188121..188273	hypothetical protein; -	0
36	188333..188962	PHAGE_Gordon_Nyceirae_NC_031004: hypothetical protein; -; phage(gi100018)	6.49e-12
37	189058..189411	hypothetical protein; -	0
38	189450..189860	PHAGE_Gordon_Nyceirae_NC_031004: hypothetical protein; -; phage(gi100020)	5.13e-12
39	189889..191337	PHAGE_Gordon_BritBrat_NC_030942: hypothetical protein; -; phage(gi100018)	5.15e-72
40	191334..192659	PHAGE_Gordon_Terrapin_NC_031001: hypothetical protein; -; phage(gi100022)	2.54e-33
41	192659..193570	PHAGE_Gordon_Splinter_NC_030927: hypothetical protein; -; phage(gi100020)	5.68e-25
42	193598..194533	PHAGE_Gordon_Obliviate_NC_031237: hypothetical protein; -; phage(gi100016)	2.36e-09
43	206074..206122	attR	0
Region 2, total 52 CDS
#	CDS Position	BLAST Hit	E-Value
1	695803..695814	attL	0
2	702122..702265	PHAGE_Clostr_CDKM9_NC_048642: tail fiber protein; -; phage(gi100052)	4.55e-09
3	702460..703053	hypothetical phage-associated protein; -	0
4	703155..703409	hypothetical protein; -	0
5	703406..703816	PHAGE_Coryne_Stiles_NC_048789: hypothetical protein; -; phage(gi100042)	3.31e-08
6	703809..704951	PHAGE_Coryne_SamW_NC_048069: DNA adenine methyltransferase; -; phage(gi100041)	1.1e-143
7	704957..705502	PHAGE_Coryne_SamW_NC_048069: hypothetical protein; -; phage(gi100042)	3.61e-72
8	705515..705712	hypothetical protein; -	0
9	705789..707756	PHAGE_Coryne_StAB_NC_048780: HNH endonuclease; -; phage(gi100046)	0
10	complement(707767..708591)	hypothetical protein; -	0
11	708850..709614	PHAGE_Staphy_37_NC_007055: ORF016; -; phage(gi66395745)	9.71e-52
12	709611..710054	PHAGE_Faecal_FP_Lagaffe_NC_047911: hypothetical protein; -; phage(gi100051)	1.1e-21
13	710051..712312	PHAGE_Lactob_T25_NC_048625: hypothetical protein; -; phage(gi100020)	2.37e-55
14	712455..712733	PHAGE_Coryne_Lederberg_NC_048790: DNA helicase; -; phage(gi100044)	4.45e-19
15	712714..714090	PHAGE_Coryne_Stiles_NC_048789: putative single-stranded DNA binding protein; -; phage(gi100050)	0
16	714078..714542	hypothetical phage-associated protein; -	0
17	complement(714625..715008)	hypothetical protein; -	0
18	715038..715181	hypothetical protein; -	0
19	715352..715927	Phage terminase, small subunit; -	0
20	716009..717193	PHAGE_Faecal_FP_Brigit_NC_047909: hypothetical protein; -; phage(gi100017)	9.31e-98
21	717165..718415	PHAGE_Faecal_FP_Epona_NC_047910: u-spanin; -; phage(gi100032)	3.9e-113
22	718561..718746	hypothetical protein; -	0
23	718743..719399	hypothetical protein; -	0
24	719396..719593	PHAGE_Bacill_SP_15_NC_031245: hypothetical protein; -; phage(gi100310)	4.92e-10
25	719689..720024	hypothetical protein; -	0
26	720220..720507	hypothetical protein; -	0
27	720679..720861	hypothetical protein; -	0
28	720975..722579	PHAGE_Gordon_Zirinka_NC_031097: hypothetical protein; -; phage(gi100002)	1.92e-105
29	722610..723206	hypothetical protein; -	0
30	723275..724591	PHAGE_Pseudo_phi2_NC_030931: hypothetical protein; -; phage(gi100031)	3.52e-83
31	724588..725466	PHAGE_Bacill_vB_BhaS_171_NC_030904: hypothetical protein; -; phage(gi100008)	5.35e-33
32	725485..726075	PHAGE_Burkho_KS9_NC_013055: major capsid protein gp5; -; phage(gi255033737)	2.94e-06
33	726072..726710	PHAGE_Azospi_Cd_NC_010355: Phage major capsid protein; -; phage(gi168495136)	3.43e-35
34	726732..727049	uncharacterized phage protein (possible DNA packaging); -	0
35	727160..727384	phage head-tail adaptor, putative; -	0
36	727387..727824	Phage protein, HK97, gp10; -	0
37	727821..728165	FIG00516578: hypothetical protein; -	0
38	728183..728779	PHAGE_Butyri_Arawn_NC_048848: hypothetical protein; -; phage(gi100011)	3.84e-41
39	728798..729217	PHAGE_Butyri_Arawn_NC_048848: hypothetical protein; -; phage(gi100012)	1.18e-07
40	complement(729411..729926)	hypothetical protein; -	0
41	729989..732667	PHAGE_Microb_Pikmin_NC_042119: hypothetical protein; -; phage(gi100017)	2.8e-98
42	732667..733359	PHAGE_Lactob_PLE2_NC_031036: hypothetical protein; -; phage(gi100016)	7.47e-22
43	733432..737298	PHAGE_Lactob_PLE2_NC_031036: hypothetical protein; -; phage(gi100017)	9.68e-72
44	737312..737734	PHAGE_Lactob_LpeD_NC_048677: hypothetical protein; -; phage(gi100022)	1.3e-21
45	737731..737949	hypothetical protein; -	0
46	738032..738499	PHAGE_Bacill_PfEFR_4_NC_048641: hypothetical protein; -; phage(gi100023)	2.42e-27
47	738499..739323	PHAGE_Propio_B3_NC_041892: hypothetical protein; -; phage(gi100025)	2.26e-73
48	739480..739887	Zinc-finger protein; -	0
49	739884..740072	hypothetical protein; -	0
50	740139..741392	PHAGE_Anoxyb_A403_NC_048701: tail length tape-measure protein; -; phage(gi100057)	1.92e-35
51	741389..742957	PHAGE_Lactoc_28201_NC_031013: methyltransferase type 11; -; phage(gi100001)	4.34e-28
52	755651..755662	attR	0
Region 3, total 30 CDS
#	CDS Position	BLAST Hit	E-Value
1	1609533..1610090	PHAGE_Arthro_vB_ArS_ArV2_NC_022972: tape measure protein; -; phage(gi563398126)	2.69e-06
2	complement(1610073..1610954)	PHAGE_Bacill_vB_BtS_B83_NC_048762: hypothetical protein; -; phage(gi100002)	1.98e-30
3	complement(1611253..1612911)	PHAGE_Thermu_OH2_NC_021784: SMF family protein; -; phage(gi526118339)	3.78e-21
4	complement(1612880..1613434)	PROPHAGE_Escher_Sakai: putative ATP-dependent protease; -; phage(gi15833954)	2.54e-39
5	complement(1613425..1613715)	MG(2+) CHELATASE FAMILY PROTEIN / ComM-related protein; -	0
6	complement(1613771..1613971)	PROPHAGE_Escher_Sakai: putative ATP-dependent protease; -; phage(gi15833954)	5.06e-10
7	complement(1613958..1614359)	UPF0102 protein YraN; -	0
8	complement(1614921..1615304)	PHAGE_Faecal_FP_Brigit_NC_047909: hypothetical protein; -; phage(gi100017)	1.39e-13
9	complement(1615392..1615841)	Phage terminase, small subunit; -	0
10	1615872..1616834	hypothetical protein; -	0
11	1617096..1617434	hypothetical protein; -	0
12	complement(1617565..1618029)	hypothetical protein; -	0
13	complement(1618026..1618757)	PHAGE_Coryne_SamW_NC_048069: HNH endonuclease; -; phage(gi100046)	7.32e-98
14	complement(1618747..1619391)	PHAGE_Coryne_Stiles_NC_048789: putative single-stranded DNA binding protein; -; phage(gi100050)	4.18e-103
15	complement(1619372..1619650)	PHAGE_Coryne_Lederberg_NC_048790: DNA helicase; -; phage(gi100044)	1.3e-19
16	complement(1619806..1620240)	PHAGE_Mycoba_Henu3_NC_051589: hypothetical protein; -; phage(gi100020)	1.43e-12
17	complement(1620276..1622054)	PHAGE_Lactob_phiadh_NC_000896: putative DNA-polymerase or DNA-primase; -; phage(gi9633023)	1.25e-25
18	complement(1622051..1622242)	PHAGE_Faecal_FP_Lagaffe_NC_047911: hypothetical protein; -; phage(gi100051)	5.78e-05
19	complement(1622214..1622501)	hypothetical protein; -	0
20	complement(1622498..1623265)	PHAGE_Staphy_37_NC_007055: ORF016; -; phage(gi66395745)	1.12e-53
21	1623421..1623897	hypothetical protein; -	0
22	1623993..1624253	hypothetical protein; -	0
23	complement(1624298..1624783)	PHAGE_Coryne_StAB_NC_048780: HNH endonuclease; -; phage(gi100046)	7.22e-51
24	complement(1624940..1625110)	PHAGE_Clostr_phiCT453A_NC_028991: hypothetical protein; -; phage(gi100018)	1.66e-21
25	complement(1625645..1626175)	PHAGE_Coryne_StAB_NC_048780: HNH endonuclease; -; phage(gi100046)	8.56e-43
26	complement(1626260..1626469)	hypothetical protein; -	0
27	complement(1626487..1627020)	PHAGE_Clostr_phiCT453A_NC_028991: hypothetical protein; -; phage(gi100017)	6.36e-67
28	complement(1627055..1628188)	PHAGE_Coryne_SamW_NC_048069: DNA adenine methyltransferase; -; phage(gi100041)	4.83e-140
29	complement(1628181..1628348)	PHAGE_Coryne_Stiles_NC_048789: hypothetical protein; -; phage(gi100042)	1.01e-10
30	complement(1628345..1628584)	hypothetical phage-associated protein; -	0
Region 4, total 23 CDS
#	CDS Position	BLAST Hit	E-Value
1	2121779..2121791	attL	0
2	complement(2126190..2127086)	PHAGE_Strept_Hiyaa_NC_048139: hypothetical protein; -; phage(gi100022)	4.3e-11
3	complement(2127116..2127274)	hypothetical protein; -	0
4	complement(2127283..2128485)	PHAGE_Gordon_Gsput1_NC_030932: hypothetical protein; -; phage(gi100018)	5.68e-65
5	complement(2128488..2128892)	hypothetical protein; -	0
6	complement(2128912..2129142)	hypothetical protein; -	0
7	2129163..2129585	hypothetical protein; -	0
8	complement(2129661..2130578)	PHAGE_Gordon_Schwabeltier_NC_031255: hypothetical protein; -; phage(gi100012)	4.48e-06
9	complement(2130581..2130964)	hypothetical protein; -	0
10	complement(2130964..2131242)	PHAGE_Arthro_DrManhattan_NC_048093: hypothetical protein; -; phage(gi100011)	1.15e-05
11	complement(2131255..2131566)	hypothetical protein; -	0
12	2131600..2131758	hypothetical protein; -	0
13	complement(2131949..2132077)	hypothetical protein; -	0
14	complement(2132137..2132445)	hypothetical protein; -	0
15	complement(2132458..2133378)	PHAGE_Coryne_StAB_NC_048780: hypothetical protein; -; phage(gi100006)	5.11e-89
16	complement(2133409..2133807)	PHAGE_Coryne_SamW_NC_048069: hypothetical protein; -; phage(gi100005)	5.57e-22
17	complement(2133823..2135139)	PHAGE_Gordon_Blueberry_NC_030943: hypothetical protein; -; phage(gi100004)	1.89e-44
18	complement(2135136..2136632)	PHAGE_Coryne_Stiles_NC_048789: hypothetical protein; -; phage(gi100003)	4.23e-92
19	complement(2136654..2136812)	hypothetical protein; -	0
20	complement(2136825..2137376)	PHAGE_Gordon_Bowser_NC_030930: hypothetical protein; -; phage(gi100002)	1.27e-11
21	2137421..2138338	hypothetical protein; -	0
22	2138563..2138575	attR	0
23	2138776..2139558	PHAGE_Gordon_Gsput1_NC_030932: hypothetical protein; -; phage(gi100028)	5.01e-34
05-13 v2
Total: 3 prophage regions have been identified, of which 0 regions are intact, 1 regions are incomplete, and 2 regions are questionable.
Region	Region Length	Completeness	Score	# Total Proteins	Region Position	Most Common Phage	GC %
1	38Kb	questionable	70	40	168012-206079	PHAGE_Gordon_Nyceirae_NC_031004(9)	0.5272
2	59.8Kb	questionable	70	49	695830-755677	PHAGE_Coryne_Adelaide_NC_048791(6)	0.5759
3	20.7Kb	incomplete	20	25	2118175-2138907	PHAGE_Coryne_SamW_NC_048069(4)	0.548
Region 1, total 42 CDS
#	CDS Position	BLAST Hit	E-Value
1	168012..168060	attL	0
2	168296..168670	PHAGE_Mycoba_Xavia_NC_051740: hypothetical protein; -; phage(gi100039)	2.26e-21
3	168654..168968	hypothetical protein; -	0
4	complement(169109..169927)	PHAGE_Coryne_Poushou_NC_042139: endolysin; -; phage(gi100033)	1.31e-93
5	complement(169924..170334)	PHAGE_Coryne_Poushou_NC_042139: endolysin; -; phage(gi100033)	4.68e-09
6	complement(170456..170686)	PHAGE_Rhodoc_REQ2_NC_016652: hypothetical protein; -; phage(gi372449852)	1.27e-18
7	complement(170689..170958)	hypothetical protein; -	0
8	complement(171053..171460)	PHAGE_Coryne_Poushou_NC_042139: hypothetical protein; -; phage(gi100035)	8.93e-65
9	complement(171470..171961)	PHAGE_Coryne_Poushou_NC_042139: hypothetical protein; -; phage(gi100036)	5.69e-21
10	172081..172320	Transcriptional regulator; -	0
11	172368..172835	hypothetical protein; -	0
12	172905..173411	hypothetical protein; -	0
13	complement(173447..174349)	hypothetical protein; -	0
14	174407..174634	hypothetical protein; -	0
15	174650..175663	PHAGE_Mycoba_Willsammy_NC_051727: holin; -; phage(gi100034)	7.44e-61
16	175744..176502	PHAGE_Coryne_Poushou_NC_042139: recombination protein; -; phage(gi100049)	4.96e-25
17	176499..176915	PHAGE_Coryne_Poushou_NC_042139: putative single-stranded DNA binding protein; -; phage(gi100050)	8.96e-22
18	176943..177764	PHAGE_Coryne_Poushou_NC_042139: tail fiber protein; -; phage(gi100052)	3.54e-108
19	177886..178461	PHAGE_Coryne_Poushou_NC_042139: tail assembly protein; -; phage(gi100053)	1.48e-24
20	178566..178961	hypothetical protein; -	0
21	179086..179565	PHAGE_Gordon_Nyceirae_NC_031004: hypothetical protein; -; phage(gi100004)	5.21e-29
22	179549..180619	PHAGE_Gordon_Nyceirae_NC_031004: hypothetical protein; -; phage(gi100005)	1.75e-138
23	180594..181205	PHAGE_Gordon_Nyceirae_NC_031004: hypothetical protein; -; phage(gi100006)	1.96e-72
24	181205..181381	hypothetical protein; -	0
25	181424..182533	PHAGE_Rhodoc_Hiro_NC_048669: hypothetical protein; -; phage(gi100009)	1.94e-57
26	182552..184252	PHAGE_Gordon_Nyceirae_NC_031004: hypothetical protein; -; phage(gi100008)	1.84e-42
27	184249..184551	hypothetical protein; -	0
28	184628..185248	PHAGE_Mycoba_Benedict_NC_042331: hypothetical protein; -; phage(gi100012)	7.61e-05
29	185260..186249	PHAGE_Gordon_GMA1_NC_030902: hypothetical protein; -; phage(gi100006)	4.47e-123
30	186261..186560	PHAGE_Strept_Picard_NC_047794: hypothetical protein; -; phage(gi100008)	3.16e-05
31	186573..186983	hypothetical protein; -	0
32	186977..187348	hypothetical protein; -	0
33	187345..187665	PHAGE_Gordon_Nyceirae_NC_031004: hypothetical protein; -; phage(gi100016)	4.94e-22
34	187674..188117	PHAGE_Gordon_Nyceirae_NC_031004: hypothetical protein; -; phage(gi100017)	2.82e-13
35	188135..188287	hypothetical protein; -	0
36	188347..188976	PHAGE_Gordon_Nyceirae_NC_031004: hypothetical protein; -; phage(gi100018)	6.49e-12
37	189069..189422	hypothetical protein; -	0
38	189461..189871	PHAGE_Gordon_Nyceirae_NC_031004: hypothetical protein; -; phage(gi100020)	4.4e-12
39	189900..192590	PHAGE_Gordon_BritBrat_NC_030942: hypothetical protein; -; phage(gi100018)	8.04e-69
40	192667..193578	PHAGE_Gordon_Splinter_NC_030927: hypothetical protein; -; phage(gi100020)	5.68e-25
41	193606..194541	PHAGE_Gordon_Obliviate_NC_031237: hypothetical protein; -; phage(gi100016)	2.36e-09
42	206079..206127	attR	0
Region 2, total 51 CDS
#	CDS Position	BLAST Hit	E-Value
1	695830..695841	attL	0
2	702149..702292	PHAGE_Clostr_CDKM9_NC_048642: tail fiber protein; -; phage(gi100052)	4.55e-09
3	702573..703079	hypothetical phage-associated protein; -	0
4	703181..703435	hypothetical protein; -	0
5	703432..703842	PHAGE_Coryne_Stiles_NC_048789: hypothetical protein; -; phage(gi100042)	3.31e-08
6	703835..704977	PHAGE_Coryne_SamW_NC_048069: DNA adenine methyltransferase; -; phage(gi100041)	1.1e-143
7	704983..705528	PHAGE_Coryne_SamW_NC_048069: hypothetical protein; -; phage(gi100042)	3.61e-72
8	705541..705738	hypothetical protein; -	0
9	705815..707782	PHAGE_Coryne_StAB_NC_048780: HNH endonuclease; -; phage(gi100046)	0
10	complement(707793..708617)	hypothetical protein; -	0
11	708876..709640	PHAGE_Staphy_37_NC_007055: ORF016; -; phage(gi66395745)	9.71e-52
12	709637..710080	PHAGE_Faecal_FP_Lagaffe_NC_047911: hypothetical protein; -; phage(gi100051)	1.1e-21
13	710077..712338	PHAGE_Lactob_T25_NC_048625: hypothetical protein; -; phage(gi100020)	2.37e-55
14	712481..712759	PHAGE_Coryne_Lederberg_NC_048790: DNA helicase; -; phage(gi100044)	4.45e-19
15	712740..714116	PHAGE_Coryne_Stiles_NC_048789: putative single-stranded DNA binding protein; -; phage(gi100050)	0
16	714104..714568	hypothetical phage-associated protein; -	0
17	complement(714651..715034)	hypothetical protein; -	0
18	715064..715207	hypothetical protein; -	0
19	715378..715953	Phage terminase, small subunit; -	0
20	716035..717219	PHAGE_Faecal_FP_Brigit_NC_047909: hypothetical protein; -; phage(gi100017)	9.31e-98
21	717191..718441	PHAGE_Faecal_FP_Epona_NC_047910: u-spanin; -; phage(gi100032)	3.9e-113
22	718587..718772	hypothetical protein; -	0
23	718769..719425	hypothetical protein; -	0
24	719422..719619	PHAGE_Bacill_SP_15_NC_031245: hypothetical protein; -; phage(gi100310)	4.92e-10
25	719715..720050	hypothetical protein; -	0
26	720246..720533	hypothetical protein; -	0
27	720705..720887	hypothetical protein; -	0
28	721001..722605	PHAGE_Gordon_Zirinka_NC_031097: hypothetical protein; -; phage(gi100002)	1.92e-105
29	722636..723232	hypothetical protein; -	0
30	723301..724617	PHAGE_Pseudo_phi2_NC_030931: hypothetical protein; -; phage(gi100031)	3.52e-83
31	724614..725492	PHAGE_Bacill_vB_BhaS_171_NC_030904: hypothetical protein; -; phage(gi100008)	5.35e-33
32	725511..726737	PHAGE_Salmon_118970_sal3_NC_031940: hypothetical protein; -; phage(gi100008)	8.77e-41
33	726759..727076	uncharacterized phage protein (possible DNA packaging); -	0
34	727080..727409	phage head-tail adaptor, putative; -	0
35	727412..727849	Phage protein, HK97, gp10; -	0
36	727846..728190	FIG00516578: hypothetical protein; -	0
37	728208..728804	PHAGE_Butyri_Arawn_NC_048848: hypothetical protein; -; phage(gi100011)	3.84e-41
38	728823..729242	PHAGE_Butyri_Arawn_NC_048848: hypothetical protein; -; phage(gi100012)	1.18e-07
39	complement(729436..729951)	hypothetical protein; -	0
40	730014..732692	PHAGE_Microb_Pikmin_NC_042119: hypothetical protein; -; phage(gi100017)	2.95e-98
41	732692..733384	PHAGE_Lactob_PLE2_NC_031036: hypothetical protein; -; phage(gi100016)	7.47e-22
42	733457..737323	PHAGE_Lactob_PLE2_NC_031036: hypothetical protein; -; phage(gi100017)	9.68e-72
43	737337..737759	PHAGE_Lactob_LpeD_NC_048677: hypothetical protein; -; phage(gi100022)	1.3e-21
44	737756..737974	hypothetical protein; -	0
45	738056..738523	PHAGE_Bacill_PfEFR_4_NC_048641: hypothetical protein; -; phage(gi100023)	2.42e-27
46	738523..739347	PHAGE_Propio_B3_NC_041892: hypothetical protein; -; phage(gi100025)	2.26e-73
47	739504..739911	Zinc-finger protein; -	0
48	739908..740096	hypothetical protein; -	0
49	740163..741416	PHAGE_Anoxyb_A403_NC_048701: tail length tape-measure protein; -; phage(gi100057)	1.92e-35
50	741413..742981	PHAGE_Lactoc_28201_NC_031013: methyltransferase type 11; -; phage(gi100001)	4.34e-28
51	755677..755688	attR	0
Region 3, total 27 CDS
#	CDS Position	BLAST Hit	E-Value
1	2118175..2118188	attL	0
2	complement(2124348..2124500)	PHAGE_Rhodoc_ReqiPine5_NC_023722: tape measure protein; -; phage(gi593778368)	1.83e-07
3	complement(2124636..2125355)	PHAGE_Mycoba_Findley_NC_051598: hypothetical protein; -; phage(gi100018)	1.02e-21
4	complement(2125528..2126424)	PHAGE_Strept_Hiyaa_NC_048139: hypothetical protein; -; phage(gi100022)	4.3e-11
5	complement(2126454..2126612)	hypothetical protein; -	0
6	complement(2126621..2127823)	PHAGE_Gordon_Gsput1_NC_030932: hypothetical protein; -; phage(gi100018)	5.68e-65
7	complement(2127826..2128230)	hypothetical protein; -	0
8	complement(2128250..2128405)	hypothetical protein; -	0
9	complement(2128557..2128904)	hypothetical protein; -	0
10	complement(2128999..2129916)	PHAGE_Gordon_Schwabeltier_NC_031255: hypothetical protein; -; phage(gi100012)	4.48e-06
11	complement(2129919..2130302)	hypothetical protein; -	0
12	complement(2130302..2130580)	PHAGE_Arthro_DrManhattan_NC_048093: hypothetical protein; -; phage(gi100011)	1.15e-05
13	complement(2130593..2130916)	hypothetical protein; -	0
14	2130947..2131108	hypothetical protein; -	0
15	complement(2131299..2131427)	hypothetical protein; -	0
16	complement(2131487..2131795)	hypothetical protein; -	0
17	complement(2131808..2132596)	PHAGE_Coryne_StAB_NC_048780: hypothetical protein; -; phage(gi100006)	4.63e-61
18	complement(2132760..2133158)	PHAGE_Coryne_SamW_NC_048069: hypothetical protein; -; phage(gi100005)	5.57e-22
19	complement(2133174..2134490)	PHAGE_Gordon_Blueberry_NC_030943: hypothetical protein; -; phage(gi100004)	1.89e-44
20	complement(2134487..2134654)	PHAGE_Arthro_Vibaki_NC_049465: hypothetical protein; -; phage(gi100005)	1.19e-07
21	complement(2134635..2135981)	PHAGE_Coryne_Stiles_NC_048789: hypothetical protein; -; phage(gi100003)	1.51e-92
22	complement(2136003..2136143)	hypothetical protein; -	0
23	complement(2136174..2136725)	PHAGE_Gordon_Bowser_NC_030930: hypothetical protein; -; phage(gi100002)	1.27e-11
24	2136770..2137285	hypothetical protein; -	0
25	2137524..2137688	hypothetical protein; -	0
26	2138148..2138161	attR	0
27	2138509..2138907	PHAGE_Mycoba_MiaZeal_NC_028953: integrase; -; phage(gi971759993)	6.34e-17
KL0182 v2
Total: 4 prophage regions have been identified, of which 0 regions are intact, 2 regions are incomplete, and 2 regions are questionable.
Region	Region Length	Completeness	Score	# Total Proteins	Region Position	Most Common Phage	GC %
1	32.8Kb	questionable	70	48	168012-200867	PHAGE_Gordon_Nyceirae_NC_031004(10)	0.5235
2	22.6Kb	questionable	90	24	1977342-2000034	PHAGE_Lactob_PLE2_NC_031036(3)	0.5978
3	15.9Kb	incomplete	20	17	2003143-2019129	PHAGE_Coryne_Adelaide_NC_048791(6)	0.6176
4	17.7Kb	incomplete	10	21	2113726-2131515	PHAGE_Coryne_Lederberg_NC_048790(4)	0.5481
Region 1, total 50 CDS
#	CDS Position	BLAST Hit	E-Value
1	168012..168060	attL	0
2	168296..168670	PHAGE_Mycoba_Xavia_NC_051740: hypothetical protein; -; phage(gi100039)	2.58e-21
3	168654..168968	hypothetical protein; -	0
4	complement(169109..169927)	PHAGE_Coryne_Poushou_NC_042139: endolysin; -; phage(gi100033)	3.39e-93
5	complement(169924..170334)	PHAGE_Coryne_Poushou_NC_042139: endolysin; -; phage(gi100033)	4.68e-09
6	complement(170456..170686)	PHAGE_Rhodoc_REQ2_NC_016652: hypothetical protein; -; phage(gi372449852)	1.27e-18
7	complement(170689..170958)	hypothetical protein; -	0
8	complement(171053..171460)	PHAGE_Coryne_Poushou_NC_042139: hypothetical protein; -; phage(gi100035)	8.93e-65
9	complement(171470..171961)	PHAGE_Coryne_Poushou_NC_042139: hypothetical protein; -; phage(gi100036)	5.69e-21
10	172081..172320	Transcriptional regulator; -	0
11	172368..172835	hypothetical protein; -	0
12	172905..173129	hypothetical protein; -	0
13	complement(173233..174135)	hypothetical protein; -	0
14	174193..174420	hypothetical protein; -	0
15	174511..175449	PHAGE_Mycoba_Willsammy_NC_051727: holin; -; phage(gi100034)	1.81e-56
16	175530..176288	PHAGE_Coryne_Poushou_NC_042139: recombination protein; -; phage(gi100049)	4.11e-25
17	176285..176701	PHAGE_Coryne_Poushou_NC_042139: putative single-stranded DNA binding protein; -; phage(gi100050)	8.96e-22
18	176729..177760	PHAGE_Coryne_Poushou_NC_042139: tail fiber protein; -; phage(gi100052)	1.46e-130
19	177991..178248	hypothetical protein; -	0
20	178353..178748	hypothetical protein; -	0
21	178873..179352	PHAGE_Gordon_Nyceirae_NC_031004: hypothetical protein; -; phage(gi100004)	1.21e-29
22	179561..180406	PHAGE_Gordon_Nyceirae_NC_031004: hypothetical protein; -; phage(gi100005)	6.38e-111
23	180381..180992	PHAGE_Gordon_Nyceirae_NC_031004: hypothetical protein; -; phage(gi100006)	6.73e-72
24	180992..181936	PHAGE_Mycoba_Astro_NC_042337: hypothetical protein; -; phage(gi100010)	4.36e-40
25	181933..182319	PHAGE_Mycoba_20ES_NC_023597: portal protein; -; phage(gi589892623)	1.82e-11
26	182338..184089	PHAGE_Gordon_Nyceirae_NC_031004: hypothetical protein; -; phage(gi100008)	2.31e-39
27	184086..184388	hypothetical protein; -	0
28	184465..185073	hypothetical protein; -	0
29	185085..186074	PHAGE_Gordon_GMA1_NC_030902: hypothetical protein; -; phage(gi100006)	4.47e-123
30	186086..186385	PHAGE_Strept_Picard_NC_047794: hypothetical protein; -; phage(gi100008)	3.16e-05
31	186398..186808	hypothetical protein; -	0
32	186802..187173	hypothetical protein; -	0
33	187170..187490	PHAGE_Gordon_Nyceirae_NC_031004: hypothetical protein; -; phage(gi100016)	4.94e-22
34	187499..187942	PHAGE_Gordon_Nyceirae_NC_031004: hypothetical protein; -; phage(gi100017)	1.66e-12
35	187961..188113	hypothetical protein; -	0
36	188173..188802	PHAGE_Gordon_Nyceirae_NC_031004: hypothetical protein; -; phage(gi100018)	6.49e-12
37	188895..189248	hypothetical protein; -	0
38	189287..189697	PHAGE_Gordon_Nyceirae_NC_031004: hypothetical protein; -; phage(gi100020)	4.4e-12
39	189726..191990	PHAGE_Gordon_BritBrat_NC_030942: hypothetical protein; -; phage(gi100018)	1.07e-69
40	191987..192496	PHAGE_Gordon_Suzy_NC_047990: hypothetical protein; -; phage(gi100022)	1.9e-12
41	192496..193407	PHAGE_Gordon_Splinter_NC_030927: hypothetical protein; -; phage(gi100020)	5.68e-25
42	193435..194370	PHAGE_Gordon_Obliviate_NC_031237: hypothetical protein; -; phage(gi100016)	2.36e-09
43	194594..195412	hypothetical protein; -	0
44	195400..195789	FIG00547403: hypothetical protein; -	0
45	195802..196662	PHAGE_Coryne_C3PO_NC_042085: putative phosphoesterase; -; phage(gi100037)	1.08e-41
46	196698..196862	PHAGE_Mycoba_Joedirt_NC_042313: hypothetical protein; -; phage(gi100026)	4.51e-11
47	196866..197240	hypothetical protein; -	0
48	197230..197694	PHAGE_Coryne_Poushou_NC_042139: hypothetical protein; -; phage(gi100027)	1.54e-25
49	197691..198023	PHAGE_Coryne_Poushou_NC_042139: hypothetical protein; -; phage(gi100028)	3.34e-13
50	200867..200915	attR	0
Region 2, total 24 CDS
#	CDS Position	BLAST Hit	E-Value
1	complement(1977342..1978931)	PHAGE_Bacill_WBeta_NC_007734: putative site-specific recombinase; -; phage(gi85701406)	1.5e-27
2	complement(1978928..1980181)	PHAGE_Anoxyb_A403_NC_048701: tail length tape-measure protein; -; phage(gi100057)	4.02e-33
3	complement(1980246..1980434)	hypothetical protein; -	0
4	complement(1980431..1980838)	Zinc-finger protein; -	0
5	complement(1980995..1981819)	PHAGE_Propio_Anatole_NC_041890: hypothetical protein; -; phage(gi100025)	3.83e-69
6	complement(1981816..1982283)	PHAGE_Bacill_IEBH_NC_011167: holin; -; phage(gi197261577)	6.15e-26
7	complement(1982366..1982560)	hypothetical protein; -	0
8	complement(1982553..1983008)	PHAGE_Lactob_iA2_NC_028830: hypothetical protein; -; phage(gi971747645)	3.57e-14
9	complement(1983023..1987270)	PHAGE_Lactob_iA2_NC_028830: tail protein; -; phage(gi971747644)	7.94e-70
10	complement(1987351..1988043)	PHAGE_Lactob_iA2_NC_028830: tail protein; -; phage(gi971747643)	4e-25
11	complement(1988043..1990727)	PHAGE_Microb_Pikmin_NC_042119: hypothetical protein; -; phage(gi100017)	1.88e-98
12	1990830..1991270	hypothetical protein; -	0
13	1991274..1991471	PHAGE_Brevib_Abouo_NC_029029: XRE family transcriptional regulator; -; phage(gi971767218)	2.09e-11
14	complement(1991662..1992066)	PHAGE_Butyri_Arawn_NC_048848: hypothetical protein; -; phage(gi100012)	5.02e-06
15	complement(1992063..1992680)	PHAGE_Paenib_Harrison_NC_028746: major tail protein; -; phage(gi971482321)	6.56e-29
16	complement(1992685..1993044)	FIG00516578: hypothetical protein; -	0
17	complement(1993041..1993475)	Phage protein, HK97, gp10; -	0
18	complement(1993468..1993809)	phage head-tail adaptor, putative; -	0
19	complement(1993924..1994145)	uncharacterized phage protein (possible DNA packaging); -	0
20	complement(1994188..1995408)	PHAGE_Geobac_GBK2_NC_023612: minor capsid protein; -; phage(gi589893767)	1.35e-39
21	complement(1995430..1996305)	PHAGE_Geobac_E2_NC_009552: putative Clp peptidase; -; phage(gi148747731)	1.4e-44
22	complement(1996302..1997633)	PHAGE_Entero_mEp235_NC_019708: portal protein; -; phage(gi428781813)	1.33e-87
23	1997668..1998450	hypothetical protein; -	0
24	complement(1998436..2000034)	PHAGE_Gordon_Zirinka_NC_031097: hypothetical protein; -; phage(gi100002)	7.81e-106
Region 3, total 17 CDS
#	CDS Position	BLAST Hit	E-Value
1	complement(2003143..2004330)	PHAGE_Faecal_FP_Brigit_NC_047909: hypothetical protein; -; phage(gi100017)	1.9e-103
2	complement(2004410..2004985)	Phage terminase, small subunit; -	0
3	2005046..2005882	hypothetical protein; -	0
4	2006048..2006524	hypothetical protein; -	0
5	complement(2006629..2007090)	hypothetical phage-associated protein; -	0
6	complement(2007081..2008457)	PHAGE_Coryne_Stiles_NC_048789: putative single-stranded DNA binding protein; -; phage(gi100050)	0
7	complement(2008438..2008716)	PHAGE_Coryne_StAB_NC_048780: recombination protein; -; phage(gi100049)	4.23e-20
8	complement(2008997..2011252)	PHAGE_Mycoba_Findley_NC_051598: hypothetical protein; -; phage(gi100073)	3.99e-64
9	complement(2011249..2011692)	PHAGE_Faecal_FP_Lagaffe_NC_047911: hypothetical protein; -; phage(gi100051)	1.75e-21
10	complement(2011689..2012453)	PHAGE_Staphy_37_NC_007055: ORF016; -; phage(gi66395745)	3e-52
11	complement(2012521..2012652)	hypothetical protein; -	0
12	2012886..2013827	PHAGE_Strept_phiARI0131_1_NC_031901: hypothetical protein; -; phage(gi100005)	6.28e-14
13	complement(2013841..2016741)	PHAGE_Coryne_SamW_NC_048069: hypothetical protein; -; phage(gi100043)	0
14	complement(2016813..2017001)	hypothetical protein; -	0
15	complement(2017015..2017569)	PHAGE_Coryne_SamW_NC_048069: hypothetical protein; -; phage(gi100042)	7.84e-74
16	complement(2017587..2018726)	PHAGE_Coryne_SamW_NC_048069: DNA adenine methyltransferase; -; phage(gi100041)	8.78e-141
17	complement(2018719..2019129)	PHAGE_Coryne_Stiles_NC_048789: hypothetical protein; -; phage(gi100042)	9.29e-08
Region 4, total 23 CDS
#	CDS Position	BLAST Hit	E-Value
1	2113726..2113738	attL	0
2	complement(2118138..2119034)	PHAGE_Strept_Hiyaa_NC_048139: hypothetical protein; -; phage(gi100022)	2.69e-12
3	complement(2119105..2119221)	hypothetical protein; -	0
4	complement(2119230..2120432)	PHAGE_Gordon_Gsput1_NC_030932: hypothetical protein; -; phage(gi100018)	2.01e-65
5	complement(2120435..2120839)	hypothetical protein; -	0
6	complement(2120860..2121006)	hypothetical protein; -	0
7	complement(2121167..2121514)	hypothetical protein; -	0
8	complement(2121609..2122526)	PHAGE_Gordon_Schwabeltier_NC_031255: hypothetical protein; -; phage(gi100012)	4.48e-06
9	complement(2122529..2122912)	hypothetical protein; -	0
10	complement(2122912..2123190)	PHAGE_Arthro_Yang_NC_048097: hypothetical protein; -; phage(gi100011)	2.58e-05
11	complement(2123203..2123526)	hypothetical protein; -	0
12	2123560..2123718	hypothetical protein; -	0
13	complement(2123909..2124037)	hypothetical protein; -	0
14	complement(2124097..2124405)	hypothetical protein; -	0
15	complement(2124418..2125338)	PHAGE_Coryne_StAB_NC_048780: hypothetical protein; -; phage(gi100006)	5.11e-89
16	complement(2125369..2125767)	PHAGE_Coryne_SamW_NC_048069: hypothetical protein; -; phage(gi100005)	5.57e-22
17	complement(2125783..2127099)	PHAGE_Gordon_Blueberry_NC_030943: hypothetical protein; -; phage(gi100004)	1.89e-44
18	complement(2127096..2128589)	PHAGE_Coryne_Stiles_NC_048789: hypothetical protein; -; phage(gi100003)	4.82e-92
19	complement(2128611..2128751)	hypothetical protein; -	0
20	complement(2128782..2129333)	PHAGE_Gordon_Bowser_NC_030930: hypothetical protein; -; phage(gi100002)	1.27e-11
21	2129378..2130295	hypothetical protein; -	0
22	2130520..2130532	attR	0
23	2130733..2131515	PHAGE_Gordon_Gsput1_NC_030932: hypothetical protein; -; phage(gi100028)	5.01e-34
