# Supplementary material for: Analysis of Corynebacterium silvaticum genomes from Portugal reveals a single cluster and a clade suggested to produce diphtheria toxin
Source: PeerJ. 2023 Mar 9;11:e14895. doi: 10.7717/peerj.14895 (PMC10008321; doi:10.7717/peerj.14895)
Supplement: Supplemental Information 7 [file peerj-11-14895-s007.xlsx]

## Sheet: ANI
	CsPO100-5	CsPO101-5	CsPO102-5	CsPO104-5	CsPO105-5	CsPO25-4	CsPO38-4	CsPO39-4	Cs05-13	Cs04-13	Cs5182	CsKL0182	CsKL0183	CsKL0259	CsKL0260	CsKL0374	CsKL0382	CsKL0386	CsKL0394	CsKL0395	CsKL0396	CsKL0400	CsKL0401	CsKL0581	CsKL0598	CsKL0615	CsKL0707	CsKL0709	CsKL0773	CsKL0774	CsKL0882	CsKL0883	CsKL0884	CsKL0886	CsKL0887	CsKL0938	CsKL0957	CsKL0968	CsKL1003	CsKL1006	CsKL1007	CsKL1008	CsKL1009	CsKL1010	CsKL1196	CsW25
CsPO100-5
CsPO101-5	99.9949
CsPO102-5	99.9993	99.9949
CsPO104-5	99.9949	99.9996	99.9949
CsPO105-5	99.9949	99.9996	99.9948	99.9995
CsPO25-4	99.9953	99.998	99.9953	99.998	99.9982
CsPO38-4	99.995	99.9995	99.995	99.9995	99.9994	99.998
CsPO39-4	99.995	99.9995	99.9949	99.9995	99.9994	99.998	99.9998
Cs05-13	99.9636	99.9644	99.9637	99.9642	99.964	99.9642	99.964	99.964
Cs04-13	99.794	99.786	99.7939	99.7863	99.7865	99.7867	99.7861	99.7861	99.823
Cs5182	99.7837	99.7814	99.7834	99.7843	99.7847	99.7849	99.7842	99.7843	99.7972	99.9945
CsKL0182	99.7739	99.7714	99.7736	99.7716	99.772	99.7721	99.7716	99.7716	99.7778	99.9948	99.9948
CsKL0183	99.772	99.7708	99.7714	99.7728	99.773	99.7732	99.7726	99.7726	99.7706	99.9916	99.9928	99.994
CsKL0259	99.7829	99.7831	99.7826	99.7834	99.7839	99.784	99.7834	99.7834	99.7971	99.9918	99.9954	99.9933	99.9942
CsKL0260	99.7698	99.7693	99.7699	99.7703	99.7704	99.7704	99.7701	99.7701	99.7722	99.9926	99.9928	99.9952	99.9923	99.9943
CsKL0374	99.7577	99.7566	99.7553	99.7587	99.7587	99.7604	99.7581	99.758	99.7608	99.9891	99.9919	99.9926	99.9935	99.9953	99.9872
CsKL0382	99.7658	99.7627	99.7634	99.7664	99.7664	99.7663	99.766	99.766	99.7662	99.9903	99.9912	99.9911	99.9888	99.9884	99.9907	99.9911
CsKL0386	99.768	99.7698	99.7694	99.7685	99.767	99.7671	99.7684	99.7685	99.8119	99.9876	99.9914	99.9887	99.9893	99.9912	99.9924	99.9856	99.9844
CsKL0394	99.768	99.7698	99.7694	99.7685	99.767	99.7671	99.7684	99.7685	99.8119	99.9876	99.9914	99.9887	99.9893	99.9912	99.9924	99.9856	99.9844	100
CsKL0395	99.7687	99.7682	99.7678	99.7691	99.7673	99.7677	99.769	99.7689	99.8196	99.9891	99.9898	99.9939	99.9928	99.9935	99.9956	99.9885	99.9918	99.9873	99.9873
CsKL0396	99.7711	99.7683	99.7688	99.7718	99.7718	99.7717	99.7714	99.7714	99.771	99.9946	99.9947	99.9947	99.9939	99.9973	99.9963	99.9894	99.9921	99.9902	99.9902	99.9968
CsKL0400	99.7784	99.781	99.7803	99.7792	99.7773	99.7775	99.779	99.779	99.8256	99.9914	99.9951	99.9929	99.9934	99.9941	99.9914	99.9909	99.9901	99.9921	99.9921	99.9953	99.9931
CsKL0401	99.7799	99.7726	99.7742	99.7778	99.7788	99.7808	99.7803	99.7803	99.7918	99.9918	99.9894	99.9947	99.9948	99.9908	99.9906	99.9942	99.9917	99.987	99.987	99.9899	99.9926	99.9943
CsKL0581	99.7683	99.77	99.7698	99.7686	99.7671	99.7674	99.7687	99.7687	99.817	99.9864	99.9906	99.991	99.9884	99.9899	99.9891	99.9905	99.9831	99.9941	99.9941	99.9944	99.9907	99.9919	99.992
CsKL0598	99.7698	99.7668	99.7674	99.7704	99.7704	99.7711	99.7701	99.7701	99.7676	99.9914	99.9934	99.9924	99.9897	99.9951	99.9924	99.9899	99.9917	99.9924	99.9924	99.9931	99.9969	99.9948	99.993	99.9903
CsKL0615	99.7697	99.7674	99.7697	99.7675	99.7677	99.7679	99.7674	99.7674	99.7732	99.9903	99.9941	99.9946	99.9937	99.9948	99.9906	99.9926	99.9949	99.9869	99.9869	99.9921	99.997	99.9946	99.9918	99.9898	99.9973
CsKL0707	99.7712	99.7676	99.7684	99.7717	99.772	99.7719	99.7717	99.7717	99.778	99.9929	99.9929	99.9946	99.994	99.9961	99.9961	99.9947	99.9849	99.991	99.991	99.9959	99.9955	99.9903	99.9949	99.9872	99.9912	99.9936
CsKL0709	99.775	99.7745	99.7739	99.7755	99.7739	99.774	99.7754	99.7754	99.821	99.9894	99.9904	99.9937	99.9931	99.9973	99.9932	99.9904	99.9936	99.9901	99.9901	99.9948	99.9931	99.993	99.9933	99.9891	99.9976	99.9955	99.9962
CsKL0773	99.7727	99.7745	99.7746	99.7724	99.7706	99.7707	99.7722	99.7722	99.8113	99.99	99.994	99.9949	99.9941	99.9966	99.9936	99.9913	99.9951	99.9924	99.9924	99.9941	99.9944	99.9941	99.992	99.9946	99.9951	99.9967	99.9923	99.9977
CsKL0774	99.7685	99.769	99.7684	99.7691	99.7694	99.7695	99.7689	99.7689	99.7698	99.9858	99.9888	99.9908	99.9938	99.9877	99.9858	99.9837	99.9847	99.9925	99.9925	99.9903	99.992	99.9881	99.9923	99.9888	99.9905	99.9915	99.9884	99.9897	99.9887
CsKL0882	99.7717	99.771	99.7716	99.7724	99.7726	99.7725	99.7722	99.7722	99.7756	99.9948	99.9952	99.9924	99.9931	99.9949	99.9973	99.989	99.988	99.993	99.993	99.9917	99.9958	99.9933	99.9907	99.9912	99.9926	99.9925	99.9908	99.9956	99.9967	99.9902
CsKL0883	99.7753	99.7774	99.7769	99.7758	99.774	99.7743	99.7756	99.7756	99.8229	99.9896	99.9923	99.9964	99.9959	99.9967	99.9958	99.992	99.9905	99.9922	99.9922	99.9958	99.994	99.9927	99.9949	99.9907	99.9938	99.9952	99.9986	99.9965	99.9974	99.9892	99.995
CsKL0884	99.7767	99.7761	99.7756	99.7774	99.7744	99.7749	99.7775	99.7775	99.8226	99.9922	99.9939	99.9945	99.9942	99.9979	99.9953	99.9889	99.9925	99.9906	99.9906	99.9962	99.9968	99.9917	99.9933	99.9877	99.9973	99.9964	99.9936	99.9945	99.9924	99.9931	99.9921	99.9941
CsKL0886	99.7585	99.7581	99.7579	99.7587	99.7594	99.759	99.759	99.759	99.7725	99.9798	99.9782	99.9901	99.9929	99.9799	99.9848	99.9889	99.9813	99.9788	99.9788	99.9762	99.9849	99.9913	99.9849	99.9863	99.9887	99.9889	99.9878	99.9878	99.9853	99.984	99.9832	99.9912	99.9884
CsKL0887	99.7639	99.7659	99.7674	99.7643	99.7627	99.7633	99.7643	99.7643	99.8106	99.9632	99.9752	99.9712	99.9812	99.9846	99.9767	99.9789	99.9828	99.9873	99.9873	99.9837	99.9878	99.9851	99.9873	99.9883	99.9865	99.9838	99.9852	99.9843	99.984	99.9863	99.9857	99.9841	99.9868	99.9833
CsKL0938	99.7742	99.7762	99.7757	99.7747	99.7729	99.7732	99.7746	99.7746	99.8203	99.9909	99.9935	99.9963	99.9942	99.997	99.997	99.9916	99.9931	99.9924	99.9924	99.9933	99.9935	99.9923	99.9929	99.9902	99.9936	99.994	99.9968	99.9951	99.9971	99.984	99.9971	99.9971	99.9937	99.9883	99.9864
CsKL0957	99.7701	99.7733	99.7701	99.7723	99.7724	99.7726	99.7721	99.7721	99.7978	99.9941	99.9908	99.9933	99.993	99.9961	99.9944	99.9936	99.9896	99.9883	99.9883	99.9946	99.9952	99.9925	99.9963	99.9809	99.9935	99.9925	99.9936	99.9944	99.9917	99.9896	99.9927	99.996	99.9961	99.9852	99.9878	99.9951
CsKL0968	99.7742	99.7739	99.7761	99.7721	99.7701	99.7703	99.7719	99.7719	99.8271	99.9926	99.9955	99.995	99.9934	99.9971	99.9975	99.9942	99.9908	99.9865	99.9865	99.996	99.9981	99.9885	99.9883	99.9868	99.9934	99.9956	99.9955	99.9917	99.991	99.9899	99.9955	99.9983	99.9967	99.9883	99.9848	99.9973	99.9945
CsKL1003	99.775	99.7767	99.7764	99.7755	99.7738	99.7748	99.7755	99.7755	99.8165	99.9914	99.9951	99.9941	99.9941	99.9955	99.9952	99.9936	99.9936	99.9914	99.9914	99.9922	99.9955	99.9957	99.9919	99.9898	99.9939	99.9947	99.9955	99.9971	99.9964	99.9858	99.9956	99.9954	99.9974	99.9882	99.9872	99.9971	99.9957	99.9917
CsKL1006	99.7713	99.7674	99.7711	99.7691	99.7694	99.7694	99.7691	99.7691	99.7772	99.9934	99.9912	99.9967	99.9934	99.994	99.9961	99.9939	99.9924	99.99	99.99	99.9936	99.9982	99.9948	99.9958	99.9886	99.9936	99.9931	99.9954	99.9967	99.9939	99.9913	99.9934	99.9964	99.9976	99.9917	99.9897	99.9968	99.9933	99.9953	99.9944
CsKL1007	99.754	99.7539	99.754	99.7544	99.7555	99.7543	99.7552	99.7552	99.7652	99.9816	99.9811	99.9832	99.9812	99.9835	99.9816	99.9874	99.9825	99.9837	99.9837	99.9883	99.9899	99.9851	99.992	99.9868	99.9863	99.9824	99.986	99.9894	99.9841	99.9837	99.9832	99.9879	99.986	99.981	99.9814	99.9822	99.9847	99.9865	99.982	99.9905
CsKL1008	99.765	99.767	99.7665	99.7655	99.7676	99.7677	99.7652	99.7653	99.8149	99.9868	99.9906	99.989	99.9879	99.9923	99.9928	99.9832	99.9889	99.9939	99.9939	99.9921	99.9902	99.9891	99.9863	99.9915	99.9909	99.9908	99.9903	99.9903	99.9952	99.9886	99.9939	99.9915	99.9881	99.9861	99.9882	99.9936	99.9854	99.9901	99.9919	99.9931	99.9798
CsKL1009	99.7609	99.7634	99.7626	99.7615	99.7596	99.76	99.7612	99.7612	99.8089	99.9865	99.9887	99.9883	99.9901	99.9925	99.992	99.9867	99.9939	99.9902	99.9902	99.9895	99.9901	99.9817	99.9892	99.9905	99.9931	99.9944	99.9917	99.9907	99.9873	99.9865	99.9893	99.9947	99.9891	99.9671	99.9751	99.9887	99.9908	99.9929	99.9936	99.9946	99.9852	99.989
CsKL1010	99.7688	99.769	99.7685	99.7666	99.7671	99.7671	99.766	99.7659	99.8174	99.9847	99.9874	99.9912	99.9894	99.9892	99.9874	99.9862	99.9857	99.9913	99.9913	99.9909	99.9883	99.988	99.9905	99.9901	99.9921	99.9876	99.9895	99.9904	99.9861	99.9898	99.9868	99.9876	99.9929	99.9779	99.9885	99.9863	99.9886	99.9888	99.9845	99.992	99.9813	99.991	99.9872
CsKL1196	99.7685	99.768	99.766	99.7717	99.772	99.7727	99.7715	99.7715	99.7768	99.9907	99.9903	99.9956	99.9947	99.9945	99.9944	99.992	99.9889	99.9915	99.9915	99.9959	99.9947	99.9923	99.9929	99.9885	99.9932	99.9933	99.9968	99.996	99.9966	99.9892	99.993	99.9972	99.995	99.9853	99.9865	99.9952	99.9951	99.9969	99.994	99.9976	99.9789	99.9879	99.996	99.9923
CsW25	99.7726	99.7738	99.7733	99.7732	99.7759	99.776	99.7731	99.7731	99.7932	99.9931	99.9962	99.9939	99.9917	99.9962	99.9951	99.9927	99.9857	99.9916	99.9916	99.9957	99.9955	99.9948	99.9936	99.9882	99.9935	99.9923	99.9946	99.994	99.9933	99.9894	99.9924	99.995	99.9957	99.9841	99.9829	99.9945	99.9955	99.9952	99.9943	99.9958	99.9879	99.9873	99.992	99.9893	99.9938
	CsPO100-5	CsPO101-5	CsPO102-5	CsPO104-5	CsPO105-5	CsPO25-4	CsPO38-4	CsPO39-4	Cs05-13	Cs04-13	Cs5182	CsKL0182	CsKL0183	CsKL0259	CsKL0260	CsKL0374	CsKL0382	CsKL0386	CsKL0394	CsKL0395	CsKL0396	CsKL0400	CsKL0401	CsKL0581	CsKL0598	CsKL0615	CsKL0707	CsKL0709	CsKL0773	CsKL0774	CsKL0882	CsKL0883	CsKL0884	CsKL0886	CsKL0887	CsKL0938	CsKL0957	CsKL0968	CsKL1003	CsKL1006	CsKL1007	CsKL1008	CsKL1009	CsKL1010	CsKL1196	CsW25
				Portugal
			Clade 1
		Clade 2
Clades 1 and 2
All strains
99.7539	99.8271	99.9632	99.9635	99.9948	99.9998	100
