# Supplementary material for: Analysis of Corynebacterium silvaticum genomes from Portugal reveals a single cluster and a clade suggested to produce diphtheria toxin
Source: PeerJ. 2023 Mar 9;11:e14895. doi: 10.7717/peerj.14895 (PMC10008321; doi:10.7717/peerj.14895)
Supplement: Supplemental Information 8 [file peerj-11-14895-s008.xlsx]

## Sheet: Genomic Islands
C. silvaticum PO100/5 v2 genomic islands
N	Name	In KL0182v2	C. glutamicum ATCC13032				C. silvaticum KL0182 v2				Annotation for BRIG
			Pathogenicity	Resistance	Metabolism	Symbiosis		Coordinates	Genes		#Start	Stop	Label	Colour	Decoration
1	GI 1	GI 1			Normal			12078..24217	2320431.9.peg.12 - 2320431.9.peg.24		12078	24217	GI 1	orange	arc
2	GI 2	GI 2						26361..45478	2320431.9.peg.28 - 2320431.9.peg.50		26361	45478	GI 2	orange	arc
3	GI 3	GI 3		Normal				55221..113895	2320431.9.peg.59 - 2320431.9.peg.131		55221	113895	GI 3	orange	arc
4	PAI 1	PAI 1	Normal		Normal	Normal		146978..152709	2320431.9.peg.169 - 2320431.9.peg.175		146978	152709	PAI 1	orange	arc
5	GI 4	GI 4						155773..222078	2320431.9.peg.180 - 2320431.9.peg.261		155773	222078	GI 4	orange	arc
6	GI 5	GI 4, GI18					False positive	197633..203283	2320431.9.peg.235-2320431.9.peg.241		197633	203283	GI 5	orange	arc
7	GI 6	GI 5		Normal	Normal			238340..263884	2320431.9.peg.280 - 2320431.9.peg.302		238340	263884	GI 6	orange	arc
8	GI 7	GI 6						306383..321752	2320431.9.peg.348 - 2320431.9.peg.365		306383	321752	GI 7	orange	arc
9	GI 8	GI 7		Normal		Normal		422329..438022	2320431.9.peg.460 - 2320431.9.peg.474		422329	438022	GI 8	orange	arc
10	PAI 2	GI 8	Weak		Weak			530251..547118	2320431.9.peg.592 - 2320431.9.peg.610		530251	547118	PAI 2	orange	arc
11	GI 9	GI 9		Normal	Normal			552022..561891	2320431.9.peg.615 - 2320431.9.peg.623		552022	561891	GI 9	orange	arc
12	PAI 3	PAI 2	Normal	Weak	Normal	Normal		599332..607043	2320431.9.peg.660 - 2320431.9.peg.666		599332	607043	PAI 3	orange	arc
13	GI 10	GI 10			Normal	Normal		665914..687101	2320431.9.peg.722 - 2320431.9.peg.738		665914	687101	GI 10	orange	arc
14	PAI 4	GI 17, PAI 3	Strong	Strong				694859..763103	2320431.9.peg.749 - 2320431.9.peg.824		694859	763103	PAI 4	orange	arc
15	GI 11	GI 11						923890..939265	2320431.9.peg.992 - 2320431.9.peg.1008		923890	939265	GI 11	orange	arc
16	GI 12	GI 12			Normal			1026897..1034071	2320431.9.peg.1103 - 2320431.9.peg.1110		1026897	1034071	GI 12	orange	arc
17	GI 13	GI 13		Strong				1227224..1244703	2320431.9.peg.1282 - 2320431.9.peg.1305		1227224	1244703	GI 13	orange	arc
18	GI 14	not annotated			Weak			1581168..1597603	2320431.9.peg.1618 - 2320431.9.peg.1631		1581168	1597603	GI 14	orange	arc
19	GI 15	GI 15						1614388..1640512	2320431.9.peg.1650 - 2320431.9.peg.1685		1614388	1640512	GI 15	orange	arc
20	GI 16	GI 16			Weak			1786633..1808220	2320431.9.peg.1824 - 2320431.9.peg.1847		1786633	1808220	GI 16	orange	arc
21	PAI 5	PAI 4	Weak	Normal		Weak		1894582..1907413	2320431.9.peg.1938 - 2320431.9.peg.1956		1894582	1907413	PAI 5	orange	arc
22	GI 17	GI 17				Normal		2028667..2039486	2320431.9.peg.2076 - 2320431.9.peg.2092		2028667	2039486	GI 17	orange	arc
23	GI 18	not annotated					False positive	2042836..2049076	2320431.9.peg.2095 - 2320431.9.peg.2096		2042836	2049076	GI 18	orange	arc
24	GI 19	GI 18						2101513..2137470	2320431.9.peg.2148 - 2320431.9.peg.2198		2101513	2137470	GI 19	orange	arc
25	GI 20	PAI 5			Weak			2158764..2175773	2320431.9.peg.2223 - 2320431.9.peg.2235		2158764	2175773	GI 20	orange	arc
26	GI 21	GI 19				Normal		2185099..2201875	2320431.9.peg.2250 - 2320431.9.peg.2271		2185099	2201875	GI 21	orange	arc
27	GI 22	GI 20		Normal				2229579..2235556	2320431.9.peg.2300 - 2320431.9.peg.2310		2229579	2235556	GI 22	orange	arc
28	PAI 6	PAI 6	Normal	Normal				2238878..2248079	2320431.9.peg.2314 - 2320431.9.peg.2323		2238878	2248079	PAI 6	orange	arc
29	GI 23	GI 21						2253606..2267112	2320431.9.peg.2330 - 2320431.9.peg.2344		2253606	2267112	GI 23	orange	arc
30	GI 24	GI 22		Normal				2270742..2286702	2320431.9.peg.2353 - 2320431.9.peg.2365		2270742	2286702	GI 24	orange	arc
31	PAI 7	PAI 7	Normal	Weak	Weak	Weak		2302552..2325185	2320431.9.peg.2382 - 2320431.9.peg.2397		2302552	2325185	PAI 7	orange	arc
32	PAI 8	PAI 8	Normal	Weak	Normal			2388752..2400127	2320431.9.peg.2449 - 2320431.9.peg.2459		2388752	2400127	PAI 8	orange	arc
33	GI 25	GI 23			Normal			2412505..2422765	2320431.9.peg.2472 - 2320431.9.peg.2481		2412505	2422765	GI 25	orange	arc
34	GI 26	GI 24						2428765..2433832	2320431.9.peg.2489 - 2320431.9.peg.2496		2428765	2433832	GI 26	orange	arc
35	PAI 9	PAI 9	Weak	Weak		Weak		2446318..2467981	2320431.9.peg.2512 - 2320431.9.peg.2529		2446318	2467981	PAI 9	orange	arc
36	PAI 10	PAI 10	Normal	Normal		Weak		2478631..2506059	2320431.9.peg.2542 - 2320431.9.peg.2563		2478631	2506059	PAI 10	orange	arc
Prophage 1	Region 1	Region 1
Prophage 2	Region 2	Region 2 and 3
Prophage 3	Region 3	not annotated
Prophage 4	Region4	Region4
C. silvaticum KL0182v2 genomic islands
N	Name	In PO100/5 v2	C. glutamicum ATCC13032				C. silvaticum PO100/5 v2	Coordinates	Genes		Annotation for BRIG
			Pathogenicity	Resistance	Metabolism	Symbiosis					#Start	Stop	Label	Colour	Decoration
1	GI 1	GI 1		Weak	Normal			12083..24224	2320431.19.peg.12-2320431.19.peg.24		12083	24224	GI 1	orange	arc
2	GI 2	GI 2						26368..45493	2320431.19.peg.28-2320431.19.peg.49		26368	45493	GI 2	orange	arc
3	GI 3	GI 3		Normal				55236..113899	2320431.19.peg.58-2320431.19.peg.131		55236	113899	GI 3	orange	arc
4	PAI 1	PAI 1	Normal		Normal	Normal		146988..152719	2320431.19.peg.168-2320431.19.peg.175		146988	152719	PAI 1	orange	arc
5	GI 4	GI 4						155783..212531	2320431.19.peg.180-2320431.19.peg.252		155783	212531	GI 4	orange	arc
6	GI 5	GI 6		Strong				228765..254285	2320431.19.peg.271-2320431.19.peg.296		228765	254285	GI 5	orange	arc
7	GI 6	GI 7						296785..312165	2320431.19.peg.342-2320431.19.peg.361		296785	312165	GI 6	orange	arc
8	GI 7	GI 8		Normal		Normal		412738..428433	2320431.19.peg.455-2320431.19.peg.470		412738	428433	GI 7	orange	arc
9	GI 8	PAI 2			Weak			520840..537707	2320431.19.peg.588-2320431.19.peg.607		520840	537707	GI 8	orange	arc
10	GI 9	GI 9		Normal	Normal			542611..552477	2320431.19.peg.612-2320431.19.peg.619		542611	552477	GI 9	orange	arc
11	PAI 2	PAI 3	Normal	Weak	Normal	Normal		589913..597625	2320431.19.peg.658-2320431.19.peg.664		589913	597625	PAI 2	orange	arc
12	GI 10	GI 10			Normal	Normal		656487..677674	2320431.19.peg.719-2320431.19.peg.737		656487	677674	GI 10	orange	arc
13	PAI 3	PAI 4	Normal	Weak	Normal			685435..701494	2320431.19.peg.748-2320431.19.peg.761		685435	701494	PAI 3	orange	arc
14	GI 11	GI 11						863282..878815	2320431.19.peg.925-2320431.19.peg.941		863282	878815	GI 11	orange	arc
15	GI 12	GI 12			Normal			966443..973618	2320431.19.peg.1036-2320431.19.peg.1043		966443	973618	GI 12	orange	arc
16	GI 13	GI 13		Strong				1166789..1184270	2320431.19.peg.1219-2320431.19.peg.1242		1166789	1184270	GI 13	orange	arc
17	GI 14	not annotated			Normal			1218760..1229480	2320431.19.peg.1277-2320431.19.peg.1285		1218760	1229480	GI 14	orange	arc
18	GI 15	GI 15						1553689..1579803	2320431.19.peg.1594-2320431.19.peg.1627		1553689	1579803	GI 15	orange	arc
19	GI 16	GI 16			Weak			1725849..1747436	2320431.19.peg.1764-2320431.19.peg.1787		1725849	1747436	GI 16	orange	arc
20	PAI 4	PAI 5	Weak	Normal		Weak		1833791..1846617	2320431.19.peg.1879-2320431.19.peg.1898		1833791	1846617	PAI 4	orange	arc
21	GI 17	GI 17, PAI4						1967849..2031395	2320431.19.peg.2015-2320431.19.peg.2091		1967849	2031395	GI 17	orange	arc
22	GI 18	GI 19						2093418..2129378	2320431.19.peg.2147-2320431.19.peg.2194		2093418	2129378	GI 18	orange	arc
23	PAI 5	GI 20	Weak		Weak	Weak		2150646..2167659	2320431.19.peg.2218-2320431.19.peg.2230		2150646	2167659	PAI 5	orange	arc
24	GI 19	GI 21				Normal		2176983..2193751	2320431.19.peg.2245-2320431.19.peg.2266		2176983	2193751	GI 19	orange	arc
25	GI 20	GI 22		Normal				2221454..2227432	2320431.19.peg.2294-2320431.19.peg.2304		2221454	2227432	GI 20	orange	arc
26	PAI 6	PAI 6	Normal	Normal				2230754..2239955	2320431.19.peg.2308-2320431.19.peg.2317		2230754	2239955	PAI 6	orange	arc
27	GI 21	GI 23						2245481..2258964	2320431.19.peg.2324-2320431.19.peg.2337		2245481	2258964	GI 21	orange	arc
28	GI 22	GI 24		Normal				2262594..2278551	2320431.19.peg.2345-2320431.19.peg.2357		2262594	2278551	GI 22	orange	arc
29	PAI 7	PAI 7	Normal	Weak	Weak	Weak		2294401..2317034	2320431.19.peg.2374-2320431.19.peg.2389		2294401	2317034	PAI 7	orange	arc
30	PAI 8	PAI 8	Normal		Normal			2380597..2391974	2320431.19.peg.2439-2320431.19.peg.2448		2380597	2391974	PAI 8	orange	arc
31	GI 23	GI 25			Normal			2404352..2414612	2320431.19.peg.2461-2320431.19.peg.2470		2404352	2414612	GI 23	orange	arc
32	GI 24	GI 26						2420618..2425689	2320431.19.peg.2478-2320431.19.peg.2483		2420618	2425689	GI 24	orange	arc
33	PAI 9	PAI 9	Weak	Weak		Weak		2438175..2459888	2320431.19.peg.2500-2320431.19.peg.2517		2438175	2459888	PAI 9	orange	arc
34	PAI 10	PAI 10	Weak	Weak		Weak		2470538..2497969	2320431.19.peg.2531-2320431.19.peg.2553		2470538	2497969	PAI 10	orange	arc
35	GI 25	not annotated			Weak			2515941..2532744	2320431.19.peg.2572-2320431.19.peg.2592		2515941	2532744	GI 25	orange	arc
