# Supplementary material for: Analysis of Corynebacterium silvaticum genomes from Portugal reveals a single cluster and a clade suggested to produce diphtheria toxin
Source: PeerJ. 2023 Mar 9;11:e14895. doi: 10.7717/peerj.14895 (PMC10008321; doi:10.7717/peerj.14895)
Supplement: Supplemental Information 9 [file peerj-11-14895-s009.xlsx]

## Sheet: MLST
ST	atpA	dnaE	dnaK	fusA	leuA	odhA	rpoB	Strain	Species	Host	Country
578	53	60	121	70	76	66	57	KL0182	Corynebacterium silvaticum	Wild boar	Germany
578	53	60	121	70	76	66	57	KL0183	Corynebacterium silvaticum	Wild boar	Germany
578	53	60	121	70	76	66	57	KL0259	Corynebacterium silvaticum	Wild boar	Germany
578	53	60	121	70	76	66	57	KL0260	Corynebacterium silvaticum	Wild boar	Germany
578	53	60	121	70	76	66	57	KL0382	Corynebacterium silvaticum	Wild boar	Germany
578	53	60	121	70	76	66	57	KL0374	Corynebacterium silvaticum	Wild boar	Germany
578	53	60	121	70	76	66	57	KL0394	Corynebacterium silvaticum	Wild boar	Germany
578	53	60	121	70	76	66	57	KL0386	Corynebacterium silvaticum	Wild boar	Germany
578	53	60	121	70	76	66	57	KL0395	Corynebacterium silvaticum	Wild boar	Germany
578	53	60	121	70	76	66	57	KL0396	Corynebacterium silvaticum	Wild boar	Germany
578	53	60	121	70	76	66	57	KL0401	Corynebacterium silvaticum	Wild boar	Germany
578	53	60	121	70	76	66	57	KL0400	Corynebacterium silvaticum	Wild boar	Germany
578	53	60	121	70	76	66	57	KL0598	Corynebacterium silvaticum	Wild boar	Germany
578	53	60	121	70	76	66	57	KL0581	Corynebacterium silvaticum	Wild boar	Germany
578	53	60	121	70	76	66	57	KL0615	Corynebacterium silvaticum	Wild boar	Germany
578	53	60	121	70	76	66	57	KL0707	Corynebacterium silvaticum	Wild boar	Germany
578	53	60	121	70	76	66	57	KL0709	Corynebacterium silvaticum	Wild boar	Germany
578	53	60	121	70	76	66	57	KL0773	Corynebacterium silvaticum	Wild boar	Germany
578	53	60	121	70	76	66	57	KL0882	Corynebacterium silvaticum	Wild boar	Germany
578	53	60	121	70	76	66	57	KL0774	Corynebacterium silvaticum	Wild boar	Germany
578	53	60	121	70	76	66	57	KL0883	Corynebacterium silvaticum	Wild boar	Germany
578	53	60	121	70	76	66	57	KL0884	Corynebacterium silvaticum	Wild boar	Germany
578	53	60	121	70	76	66	57	KL0886	Corynebacterium silvaticum	Wild boar	Germany
578	53	60	121	70	76	66	57	KL0887	Corynebacterium silvaticum	Wild boar	Germany
578	53	60	121	70	76	66	57	KL0957	Corynebacterium silvaticum	Wild boar	Germany
578	53	60	121	70	76	66	57	KL0938	Corynebacterium silvaticum	Wild boar	Germany
578	53	60	121	70	76	66	57	KL0968	Corynebacterium silvaticum	Wild boar	Germany
578	53	60	121	70	76	66	57	KL1003	Corynebacterium silvaticum	Wild boar	Germany
578	53	60	121	70	76	66	57	KL1007	Corynebacterium silvaticum	Wild boar	Germany
578	53	60	121	70	76	66	57	KL1006	Corynebacterium silvaticum	Wild boar	Germany
578	53	60	121	70	76	66	57	KL1008	Corynebacterium silvaticum	Wild boar	Germany
578	53	60	121	70	76	66	57	KL1009	Corynebacterium silvaticum	Wild boar	Germany
578	53	60	121	70	76	66	57	KL1010	Corynebacterium silvaticum	Wild boar	Germany
578	53	60	121	70	76	66	57	KL1196	Corynebacterium silvaticum	Roe deer	Germany
578	53	60	121	70	76	66	57	04-13	Corynebacterium silvaticum	Wild boar	Austria
578	53	60	121	70	76	66	57	05-13	Corynebacterium silvaticum	Wild boar	Austria
578	53	60	121	70	76	66	57	W25	Corynebacterium silvaticum	Wild boar	Germany
578	53	60	121	70	76	66	57	5182	Corynebacterium silvaticum	Wild boar	Switzerland
578	53	60	121	70	76	66	57	PO25/4	Corynebacterium silvaticum	Pig	Portugal
578	53	60	121	70	76	66	57	PO38/4	Corynebacterium silvaticum	Pig	Portugal
578	53	60	121	70	76	66	57	PO39/4	Corynebacterium silvaticum	Pig	Portugal
709	53	60	121	70	76	82	57	PO100/5	Corynebacterium silvaticum	Pig	Portugal
578	53	60	121	70	76	66	57	PO101/5	Corynebacterium silvaticum	Pig	Portugal
709	53	60	121	70	76	82	57	PO102/5	Corynebacterium silvaticum	Pig	Portugal
795	65	60	121	70	76	66	57	PO104/5	Corynebacterium silvaticum	Pig	Portugal
578	53	60	121	70	76	66	57	PO105/5	Corynebacterium silvaticum	Pig	Portugal
