# Supplementary material for: Analysis of Corynebacterium silvaticum genomes from Portugal reveals a single cluster and a clade suggested to produce diphtheria toxin
Source: PeerJ. 2023 Mar 9;11:e14895. doi: 10.7717/peerj.14895 (PMC10008321; doi:10.7717/peerj.14895)
Supplement: Supplemental Information 10 [file peerj-11-14895-s010.xlsx]

## Sheet: Abricate
PO25/4
START	END	GENE	COVERAGE	COVERAGE_MAP	GAPS	%COVERAGE	%IDENTITY	DATABASE	ACCESSION	PRODUCT
414693	418168	Nocardia_rifampin_resistant_beta-subunit_of_RNA_polymerase_(rpoB2)	1-3458/3489	========/======	15/56	98.57	71.9	card	AP006618.1:4835200-4838689	Due to gene duplication the genomes of Nocardia species include both rifampin-sensitive beta-subunit of RNA polymerase (rpoB) and rifampin-resistant beta-subunit of RNA polymerase (rpoB2) genes with ~88% similarity between the two gene products. Expression of the rpoB2 variant results in replacement of rifampin sensitivity with rifampin resistance.
623315	623839	mtrA	16-540/688	========/===...	2021-04-08	75.73	69.19	card	AL123456:3626663-3627350	MtrA is a transcriptional activator of the MtrCDE multidrug efflux pump of Neisseria gonorrhoeae.
1275538	1275839	RbpA	1-302/345	==============.	0/0	87.54	71.85	card	HQ203032:1-346	RNA-polymerase binding protein which confers resistance to rifampin.
204313	205995	tox	1-1683/1683	===============	0/0	100	97.39	vfdb	NP_938615	(tox) Diphtheria toxin precursor [DT (VF0363)] [Corynebacterium diphtheriae NCTC 13129]
1450737	1452610	relA	181-2063/2373	.=======/=====.	15/39	78.34	67.97	vfdb	NP_217099	(relA) Probable GTP pyrophosphokinase RelA (ATP:GTP 3'-pyrophosphotransferase) (PPGPP synthetase I) ((P)PPGPP synthetase) (GTP diphosphokinase) [RelA (VF0287)] [Mycobacterium tuberculosis H37Rv]
1502548	1502966	ideR	1-419/693	==========.....	0/0	60.46	71.12	vfdb	NP_217227	(ideR) Iron-dependent repressor and activator IdeR [IdeR (VF0300)] [Mycobacterium tuberculosis H37Rv]
2328220	2329422	ureB	208-1416/1710	.=======/====..	2021-12-16	70.06	66.14	vfdb	NP_206872	(ureB) urease beta subunit UreB urea amidohydrolase [Urease (VF0050)] [Helicobacter pylori 26695]
PO38/4
START	END	GENE	COVERAGE	COVERAGE_MAP	GAPS	%COVERAGE	%IDENTITY	DATABASE	ACCESSION	PRODUCT
414692	418167	Nocardia_rifampin_resistant_beta-subunit_of_RNA_polymerase_(rpoB2)	1-3458/3489	========/======	15/56	98.57	71.9	card	AP006618.1:4835200-4838689	Due to gene duplication the genomes of Nocardia species include both rifampin-sensitive beta-subunit of RNA polymerase (rpoB) and rifampin-resistant beta-subunit of RNA polymerase (rpoB2) genes with ~88% similarity between the two gene products. Expression of the rpoB2 variant results in replacement of rifampin sensitivity with rifampin resistance.
623316	623840	mtrA	16-540/688	========/===...	2021-04-08	75.73	69.19	card	AL123456:3626663-3627350	MtrA is a transcriptional activator of the MtrCDE multidrug efflux pump of Neisseria gonorrhoeae.
1275631	1275932	RbpA	1-302/345	==============.	0/0	87.54	71.85	card	HQ203032:1-346	RNA-polymerase binding protein which confers resistance to rifampin.
204312	205994	tox	1-1683/1683	===============	0/0	100	97.39	vfdb	NP_938615	(tox) Diphtheria toxin precursor [DT (VF0363)] [Corynebacterium diphtheriae NCTC 13129]
1450830	1452703	relA	181-2063/2373	.=======/=====.	15/39	78.34	67.97	vfdb	NP_217099	(relA) Probable GTP pyrophosphokinase RelA (ATP:GTP 3'-pyrophosphotransferase) (PPGPP synthetase I) ((P)PPGPP synthetase) (GTP diphosphokinase) [RelA (VF0287)] [Mycobacterium tuberculosis H37Rv]
1502641	1503059	ideR	1-419/693	==========.....	0/0	60.46	71.12	vfdb	NP_217227	(ideR) Iron-dependent repressor and activator IdeR [IdeR (VF0300)] [Mycobacterium tuberculosis H37Rv]
2328271	2329473	ureB	208-1416/1710	.=======/====..	2021-12-16	70.06	66.14	vfdb	NP_206872	(ureB) urease beta subunit UreB urea amidohydrolase [Urease (VF0050)] [Helicobacter pylori 26695]
PO39/4
START	END	GENE	COVERAGE	COVERAGE_MAP	GAPS	%COVERAGE	%IDENTITY	DATABASE	ACCESSION	PRODUCT
414692	418167	Nocardia_rifampin_resistant_beta-subunit_of_RNA_polymerase_(rpoB2)	1-3458/3489	========/======	15/56	98.57	71.9	card	AP006618.1:4835200-4838689	Due to gene duplication the genomes of Nocardia species include both rifampin-sensitive beta-subunit of RNA polymerase (rpoB) and rifampin-resistant beta-subunit of RNA polymerase (rpoB2) genes with ~88% similarity between the two gene products. Expression of the rpoB2 variant results in replacement of rifampin sensitivity with rifampin resistance.
623316	623840	mtrA	16-540/688	========/===...	2021-04-08	75.73	69.19	card	AL123456:3626663-3627350	MtrA is a transcriptional activator of the MtrCDE multidrug efflux pump of Neisseria gonorrhoeae.
1275627	1275928	RbpA	1-302/345	==============.	0/0	87.54	71.85	card	HQ203032:1-346	RNA-polymerase binding protein which confers resistance to rifampin.
204312	205994	tox	1-1683/1683	===============	0/0	100	97.39	vfdb	NP_938615	(tox) Diphtheria toxin precursor [DT (VF0363)] [Corynebacterium diphtheriae NCTC 13129]
1450826	1452699	relA	181-2063/2373	.=======/=====.	15/39	78.34	67.97	vfdb	NP_217099	(relA) Probable GTP pyrophosphokinase RelA (ATP:GTP 3'-pyrophosphotransferase) (PPGPP synthetase I) ((P)PPGPP synthetase) (GTP diphosphokinase) [RelA (VF0287)] [Mycobacterium tuberculosis H37Rv]
1502637	1503055	ideR	1-419/693	==========.....	0/0	60.46	71.12	vfdb	NP_217227	(ideR) Iron-dependent repressor and activator IdeR [IdeR (VF0300)] [Mycobacterium tuberculosis H37Rv]
2328267	2329469	ureB	208-1416/1710	.=======/====..	2021-12-16	70.06	66.14	vfdb	NP_206872	(ureB) urease beta subunit UreB urea amidohydrolase [Urease (VF0050)] [Helicobacter pylori 26695]
PO100/5
START	END	GENE	COVERAGE	COVERAGE_MAP	GAPS	%COVERAGE	%IDENTITY	DATABASE	ACCESSION	PRODUCT
414713	418188	Nocardia_rifampin_resistant_beta-subunit_of_RNA_polymerase_(rpoB2)	1-3458/3489	========/======	15/56	98.57	71.9	card	AP006618.1:4835200-4838689	Due to gene duplication the genomes of Nocardia species include both rifampin-sensitive beta-subunit of RNA polymerase (rpoB) and rifampin-resistant beta-subunit of RNA polymerase (rpoB2) genes with ~88% similarity between the two gene products. Expression of the rpoB2 variant results in replacement of rifampin sensitivity with rifampin resistance.
623339	623863	mtrA	16-540/688	========/===...	2021-04-08	75.73	69.19	card	AL123456:3626663-3627350	MtrA is a transcriptional activator of the MtrCDE multidrug efflux pump of Neisseria gonorrhoeae.
1275631	1275932	RbpA	1-302/345	==============.	0/0	87.54	71.85	card	HQ203032:1-346	RNA-polymerase binding protein which confers resistance to rifampin.
204303	205985	tox	1-1683/1683	===============	0/0	100	97.39	vfdb	NP_938615	(tox) Diphtheria toxin precursor [DT (VF0363)] [Corynebacterium diphtheriae NCTC 13129]
1450836	1452709	relA	181-2063/2373	.=======/=====.	15/39	78.34	67.97	vfdb	NP_217099	(relA) Probable GTP pyrophosphokinase RelA (ATP:GTP 3'-pyrophosphotransferase) (PPGPP synthetase I) ((P)PPGPP synthetase) (GTP diphosphokinase) [RelA (VF0287)] [Mycobacterium tuberculosis H37Rv]
1502647	1503065	ideR	1-419/693	==========.....	0/0	60.46	71.12	vfdb	NP_217227	(ideR) Iron-dependent repressor and activator IdeR [IdeR (VF0300)] [Mycobacterium tuberculosis H37Rv]
2328308	2329510	ureB	208-1416/1710	.=======/====..	2021-12-16	70.06	66.14	vfdb	NP_206872	(ureB) urease beta subunit UreB urea amidohydrolase [Urease (VF0050)] [Helicobacter pylori 26695]
PO101/5
START	END	GENE	COVERAGE	COVERAGE_MAP	GAPS	%COVERAGE	%IDENTITY	DATABASE	ACCESSION	PRODUCT
414691	418166	Nocardia_rifampin_resistant_beta-subunit_of_RNA_polymerase_(rpoB2)	1-3458/3489	========/======	15/56	98.57	71.9	card	AP006618.1:4835200-4838689	Due to gene duplication the genomes of Nocardia species include both rifampin-sensitive beta-subunit of RNA polymerase (rpoB) and rifampin-resistant beta-subunit of RNA polymerase (rpoB2) genes with ~88% similarity between the two gene products. Expression of the rpoB2 variant results in replacement of rifampin sensitivity with rifampin resistance.
623317	623841	mtrA	16-540/688	========/===...	2021-04-08	75.73	69.19	card	AL123456:3626663-3627350	MtrA is a transcriptional activator of the MtrCDE multidrug efflux pump of Neisseria gonorrhoeae.
1275654	1275955	RbpA	1-302/345	==============.	0/0	87.54	71.85	card	HQ203032:1-346	RNA-polymerase binding protein which confers resistance to rifampin.
204312	205994	tox	1-1683/1683	===============	0/0	100	97.39	vfdb	NP_938615	(tox) Diphtheria toxin precursor [DT (VF0363)] [Corynebacterium diphtheriae NCTC 13129]
1450853	1452726	relA	181-2063/2373	.=======/=====.	15/39	78.34	67.97	vfdb	NP_217099	(relA) Probable GTP pyrophosphokinase RelA (ATP:GTP 3'-pyrophosphotransferase) (PPGPP synthetase I) ((P)PPGPP synthetase) (GTP diphosphokinase) [RelA (VF0287)] [Mycobacterium tuberculosis H37Rv]
1502664	1503082	ideR	1-419/693	==========.....	0/0	60.46	71.12	vfdb	NP_217227	(ideR) Iron-dependent repressor and activator IdeR [IdeR (VF0300)] [Mycobacterium tuberculosis H37Rv]
2328398	2329600	ureB	208-1416/1710	.=======/====..	2021-12-16	70.06	66.14	vfdb	NP_206872	(ureB) urease beta subunit UreB urea amidohydrolase [Urease (VF0050)] [Helicobacter pylori 26695]
PO102/5
START	END	GENE	COVERAGE	COVERAGE_MAP	GAPS	%COVERAGE	%IDENTITY	DATABASE	ACCESSION	PRODUCT
414713	418188	Nocardia_rifampin_resistant_beta-subunit_of_RNA_polymerase_(rpoB2)	1-3458/3489	========/======	15/56	98.57	71.9	card	AP006618.1:4835200-4838689	Due to gene duplication the genomes of Nocardia species include both rifampin-sensitive beta-subunit of RNA polymerase (rpoB) and rifampin-resistant beta-subunit of RNA polymerase (rpoB2) genes with ~88% similarity between the two gene products. Expression of the rpoB2 variant results in replacement of rifampin sensitivity with rifampin resistance.
623340	623864	mtrA	16-540/688	========/===...	2021-04-08	75.73	69.19	card	AL123456:3626663-3627350	MtrA is a transcriptional activator of the MtrCDE multidrug efflux pump of Neisseria gonorrhoeae.
1275636	1275937	RbpA	1-302/345	==============.	0/0	87.54	71.85	card	HQ203032:1-346	RNA-polymerase binding protein which confers resistance to rifampin.
204303	205985	tox	1-1683/1683	===============	0/0	100	97.39	vfdb	NP_938615	(tox) Diphtheria toxin precursor [DT (VF0363)] [Corynebacterium diphtheriae NCTC 13129]
1450841	1452714	relA	181-2063/2373	.=======/=====.	15/39	78.34	67.97	vfdb	NP_217099	(relA) Probable GTP pyrophosphokinase RelA (ATP:GTP 3'-pyrophosphotransferase) (PPGPP synthetase I) ((P)PPGPP synthetase) (GTP diphosphokinase) [RelA (VF0287)] [Mycobacterium tuberculosis H37Rv]
1502652	1503070	ideR	1-419/693	==========.....	0/0	60.46	71.12	vfdb	NP_217227	(ideR) Iron-dependent repressor and activator IdeR [IdeR (VF0300)] [Mycobacterium tuberculosis H37Rv]
2328380	2329582	ureB	208-1416/1710	.=======/====..	2021-12-16	70.06	66.14	vfdb	NP_206872	(ureB) urease beta subunit UreB urea amidohydrolase [Urease (VF0050)] [Helicobacter pylori 26695]
PO104/5
START	END	GENE	COVERAGE	COVERAGE_MAP	GAPS	%COVERAGE	%IDENTITY	DATABASE	ACCESSION	PRODUCT
414691	418166	Nocardia_rifampin_resistant_beta-subunit_of_RNA_polymerase_(rpoB2)	1-3458/3489	========/======	15/56	98.57	71.9	card	AP006618.1:4835200-4838689	Due to gene duplication the genomes of Nocardia species include both rifampin-sensitive beta-subunit of RNA polymerase (rpoB) and rifampin-resistant beta-subunit of RNA polymerase (rpoB2) genes with ~88% similarity between the two gene products. Expression of the rpoB2 variant results in replacement of rifampin sensitivity with rifampin resistance.
623317	623841	mtrA	16-540/688	========/===...	2021-04-08	75.73	69.19	card	AL123456:3626663-3627350	MtrA is a transcriptional activator of the MtrCDE multidrug efflux pump of Neisseria gonorrhoeae.
1275659	1275960	RbpA	1-302/345	==============.	0/0	87.54	71.85	card	HQ203032:1-346	RNA-polymerase binding protein which confers resistance to rifampin.
204312	205994	tox	1-1683/1683	===============	0/0	100	97.39	vfdb	NP_938615	(tox) Diphtheria toxin precursor [DT (VF0363)] [Corynebacterium diphtheriae NCTC 13129]
1450858	1452731	relA	181-2063/2373	.=======/=====.	15/39	78.34	67.97	vfdb	NP_217099	(relA) Probable GTP pyrophosphokinase RelA (ATP:GTP 3'-pyrophosphotransferase) (PPGPP synthetase I) ((P)PPGPP synthetase) (GTP diphosphokinase) [RelA (VF0287)] [Mycobacterium tuberculosis H37Rv]
1502669	1503087	ideR	1-419/693	==========.....	0/0	60.46	71.12	vfdb	NP_217227	(ideR) Iron-dependent repressor and activator IdeR [IdeR (VF0300)] [Mycobacterium tuberculosis H37Rv]
2328302	2329504	ureB	208-1416/1710	.=======/====..	2021-12-16	70.06	66.14	vfdb	NP_206872	(ureB) urease beta subunit UreB urea amidohydrolase [Urease (VF0050)] [Helicobacter pylori 26695]
PO105/5
START	END	GENE	COVERAGE	COVERAGE_MAP	GAPS	%COVERAGE	%IDENTITY	DATABASE	ACCESSION	PRODUCT
414693	418168	Nocardia_rifampin_resistant_beta-subunit_of_RNA_polymerase_(rpoB2)	1-3458/3489	========/======	15/56	98.57	71.9	card	AP006618.1:4835200-4838689	Due to gene duplication the genomes of Nocardia species include both rifampin-sensitive beta-subunit of RNA polymerase (rpoB) and rifampin-resistant beta-subunit of RNA polymerase (rpoB2) genes with ~88% similarity between the two gene products. Expression of the rpoB2 variant results in replacement of rifampin sensitivity with rifampin resistance.
623319	623843	mtrA	16-540/688	========/===...	2021-04-08	75.73	69.19	card	AL123456:3626663-3627350	MtrA is a transcriptional activator of the MtrCDE multidrug efflux pump of Neisseria gonorrhoeae.
1275571	1275872	RbpA	1-302/345	==============.	0/0	87.54	71.85	card	HQ203032:1-346	RNA-polymerase binding protein which confers resistance to rifampin.
204312	205994	tox	1-1683/1683	===============	0/0	100	97.39	vfdb	NP_938615	(tox) Diphtheria toxin precursor [DT (VF0363)] [Corynebacterium diphtheriae NCTC 13129]
1450770	1452643	relA	181-2063/2373	.=======/=====.	15/39	78.34	67.97	vfdb	NP_217099	(relA) Probable GTP pyrophosphokinase RelA (ATP:GTP 3'-pyrophosphotransferase) (PPGPP synthetase I) ((P)PPGPP synthetase) (GTP diphosphokinase) [RelA (VF0287)] [Mycobacterium tuberculosis H37Rv]
1502617	1503035	ideR	1-419/693	==========.....	0/0	60.46	71.12	vfdb	NP_217227	(ideR) Iron-dependent repressor and activator IdeR [IdeR (VF0300)] [Mycobacterium tuberculosis H37Rv]
2328250	2329452	ureB	208-1416/1710	.=======/====..	2021-12-16	70.06	66.14	vfdb	NP_206872	(ureB) urease beta subunit UreB urea amidohydrolase [Urease (VF0050)] [Helicobacter pylori 26695]
