# Supplementary material for: Analysis of Corynebacterium silvaticum genomes from Portugal reveals a single cluster and a clade suggested to produce diphtheria toxin
Source: PeerJ. 2023 Mar 9;11:e14895. doi: 10.7717/peerj.14895 (PMC10008321; doi:10.7717/peerj.14895)
Supplement: Supplemental Information 11 [file peerj-11-14895-s011.xlsx]

## Sheet: Corynebacterium VFs
Corynebacterium_virulence_factors													Corynebacterium silvaticum PO25-4										Corynebacterium silvaticum PO38-4										Corynebacterium silvaticum PO39-4										Corynebacterium silvaticum PO100-5 v2
	ref_genome_gene_name	ref_genome_function	ref_genome_locus_tag	Reference	ref_genome_bv-brc_id	ref_genome_contig	ref_genome_gene	ref_genome_aa_length	ref_genome_plfam_id	ref_genome_pgfam_id	ref_genome_start	ref_genome_end	comp_genome_5_hit	comp_genome_5_contig	comp_genome_5_gene	comp_genome_5_aa_length	comp_genome_5_bv-brc_id	comp_genome_5_locus_tag	comp_genome_5_gene_name	comp_genome_5_function	comp_genome_5_percent_identity	comp_genome_5_seq_coverage	comp_genome_6_hit	comp_genome_6_contig	comp_genome_6_gene	comp_genome_6_aa_length	comp_genome_6_bv-brc_id	comp_genome_6_locus_tag	comp_genome_6_gene_name	comp_genome_6_function	comp_genome_6_percent_identity	comp_genome_6_seq_coverage	comp_genome_7_hit	comp_genome_7_contig	comp_genome_7_gene	comp_genome_7_aa_length	comp_genome_7_bv-brc_id	comp_genome_7_locus_tag	comp_genome_7_gene_name	comp_genome_7_function	comp_genome_7_percent_identity	comp_genome_7_seq_coverage	comp_genome_9_hit	comp_genome_9_contig	comp_genome_9_gene	comp_genome_9_aa_length	comp_genome_9_bv-brc_id	comp_genome_9_locus_tag	comp_genome_9_gene_name
1	-	C. diphtheriae DIP0733 homolog	CULC22_00609	Tauch and Burkovski 2015	fig|945712.3.peg.628	CP002791	628	988	PLF_1716_00030114	PGF_02975845	654264	657230	bi (<->)	2320431.14.con.0001	722	988	fig|2320431.14.peg.722			putative membrane protein	0.983	0.999	bi (<->)	2320431.12.con.0001	724	988	fig|2320431.12.peg.724			putative membrane protein	0.983	0.999	bi (<->)	2320431.15.con.0001	724	988	fig|2320431.15.peg.724			putative membrane protein	0.983	0.999	bi (<->)	2320431.9.con.0001	721	988	fig|2320431.9.peg.721
2	-	Secreted SGNH-hydrolase	cpfrc_00536	Trost et al. 2010	fig|765874.5.peg.565	NC_014329	565	285	PLF_1716_00003310	PGF_00203506	551005	551862	bi (<->)	2320431.14.con.0001	705	286	fig|2320431.14.peg.705			hypothetical protein	0.821	0.993	bi (<->)	2320431.12.con.0001	707	286	fig|2320431.12.peg.707			hypothetical protein	0.821	0.993	bi (<->)	2320431.15.con.0001	707	286	fig|2320431.15.peg.707			hypothetical protein	0.821	0.993	bi (<->)	2320431.9.con.0001	703	286	fig|2320431.9.peg.703
3	-	Secreted subtilisin-like serine protease	cpfrc_01634	Trost et al. 2010	fig|765874.5.peg.1715	AP012284	1715	529	PLF_1716_00002409	PGF_08225224	1788035	1789624											bi (<->)	2320431.12.con.0001	2028	205	fig|2320431.12.peg.2028			serine protease, subtilase family	0.805	0.946	bi (<->)	2320431.15.con.0001	2031	205	fig|2320431.15.peg.2031			serine protease, subtilase family	0.805	0.946	bi (<->)	2320431.9.con.0001	2027	205	fig|2320431.9.peg.2027
4	-	Secreted trypsin-like serine protease	cpfrc_00562	Trost et al. 2010	fig|765874.5.peg.591	NC_014329	591	224	PLF_1716_00003298	PGF_01367483	588673	589347
5	-	Secreted trypsin-like serine protease	cpfrc_00397	Trost et al. 2010	fig|765874.5.peg.415	NC_014329	415	392	PLF_1716_00003223	PGF_00918571	410989	412167	bi (<->)	2320431.14.con.0001	556	398	fig|2320431.14.peg.556			Serine protease, putative component of Type VII secretion system in Actinobacteria	0.798	0.977	bi (<->)	2320431.12.con.0001	558	398	fig|2320431.12.peg.558			Serine protease, putative component of Type VII secretion system in Actinobacteria	0.798	0.977	bi (<->)	2320431.15.con.0001	558	398	fig|2320431.15.peg.558			Serine protease, putative component of Type VII secretion system in Actinobacteria	0.798	0.977	bi (<->)	2320431.9.con.0001	552	398	fig|2320431.9.peg.552
6	-	Trypsin-like serine protease	FIT55_05760, A0A5C5F2T7	Moller et al. 2020	fig|65058.241.peg.1353	VFEM01000003	1353	365	PLF_1716_00003618	PGF_00410586	121364	122461	bi (<->)	2320431.14.con.0001	2311	365	fig|2320431.14.peg.2311			putative secreted protein	1	0.997	bi (<->)	2320431.12.con.0001	2313	365	fig|2320431.12.peg.2313			putative secreted protein	1	0.997	bi (<->)	2320431.15.con.0001	2317	365	fig|2320431.15.peg.2317			putative secreted protein	1	0.997	bi (<->)	2320431.9.con.0001	2314	365	fig|2320431.9.peg.2314
7	accD3	Acyl-CoA carboxylase β-subunit involved in mycolic acid synthesis	cpfrc_01953	Trost et al. 2010	fig|765874.5.peg.2053	NC_014329	2053	517	PLF_1716_00000445	PGF_01791400	2147968	2149521	bi (<->)	2320431.14.con.0001	2431	515	fig|2320431.14.peg.2431			Propionyl-CoA carboxylase beta chain (EC 6.4.1.3)	0.979	0.998	bi (<->)	2320431.12.con.0001	2432	515	fig|2320431.12.peg.2432			Propionyl-CoA carboxylase beta chain (EC 6.4.1.3)	0.979	0.998	bi (<->)	2320431.15.con.0001	2437	515	fig|2320431.15.peg.2437			Propionyl-CoA carboxylase beta chain (EC 6.4.1.3)	0.979	0.998	bi (<->)	2320431.9.con.0001	2434	515	fig|2320431.9.peg.2434
8	asa	Ceramidase	jk1103	Tauch et al. 2005, Tauch and Burkovski 2015	fig|306537.10.peg.1116	NC_007164	1116	692	PLF_1716_00010889	PGF_08225224	1297138	1299216
9	che	Cholesterol esterase	jk2054	Tauch et al. 2005, Tauch and Burkovski 2015	fig|306537.10.peg.2085	NC_007164	2085	191	PLF_1716_00025867	PGF_12728756	2407481	2408056
10	choE	Cholesterol oxidase (EC 1.1.3.6) @ Steroid Delta(5)->Delta(4)-isomerase (EC 5.3.3.1)	jk0629	Tauch et al. 2005, Tauch and Burkovski 2015	fig|306537.10.peg.642	NC_007164	642	589	PLF_1716_00005916	PGF_00417721	756296	758065
11	cwlH	Cell wall-associated hydrolases (invasion-associated proteins)	CULC809_01521	Trost et al. 2010	fig|945711.3.peg.1583	CP002790	1583	334	PLF_1716_00062893	PGF_12696555	1700794	1701798	bi (<->)	2320431.14.con.0001	1805	344	fig|2320431.14.peg.1805			Cell wall-associated hydrolases (invasion-associated proteins)	0.964	0.968	bi (<->)	2320431.12.con.0001	1807	344	fig|2320431.12.peg.1807			Cell wall-associated hydrolases (invasion-associated proteins)	0.964	0.968	bi (<->)	2320431.15.con.0001	1808	344	fig|2320431.15.peg.1808			Cell wall-associated hydrolases (invasion-associated proteins)	0.964	0.968	bi (<->)	2320431.9.con.0001	1804	344	fig|2320431.9.peg.1804
12	dtsR1	Acetyl-CoA carboxylase β-subunit involved in fatty acid synthesis	cpfrc_00492	Trost et al. 2010	fig|765874.5.peg.516	NC_014329	516	547	PLF_1716_00000718	PGF_01791400	508690	510333	bi (<->)	2320431.14.con.0001	658	547	fig|2320431.14.peg.658			Propionyl-CoA carboxylase beta chain (EC 6.4.1.3)	0.973	0.998	bi (<->)	2320431.12.con.0001	660	547	fig|2320431.12.peg.660			Propionyl-CoA carboxylase beta chain (EC 6.4.1.3)	0.973	0.998	bi (<->)	2320431.15.con.0001	660	547	fig|2320431.15.peg.660			Propionyl-CoA carboxylase beta chain (EC 6.4.1.3)	0.973	0.998	bi (<->)	2320431.9.con.0001	654	547	fig|2320431.9.peg.654
13	dtsR2	Acyl-CoA carboxylase β-subunit involved in mycolic acid synthesis	cpfrc_00491	Trost et al. 2011	fig|765874.5.peg.515	NC_014329	515	543	PLF_1716_00000903	PGF_01791400	506797	508428	bi (<->)	2320431.14.con.0001	657	543	fig|2320431.14.peg.657			Propionyl-CoA carboxylase beta chain (EC 6.4.1.3)	0.983	0.998	bi (<->)	2320431.12.con.0001	659	543	fig|2320431.12.peg.659			Propionyl-CoA carboxylase beta chain (EC 6.4.1.3)	0.983	0.998	bi (<->)	2320431.15.con.0001	659	543	fig|2320431.15.peg.659			Propionyl-CoA carboxylase beta chain (EC 6.4.1.3)	0.983	0.998	bi (<->)	2320431.9.con.0001	653	543	fig|2320431.9.peg.653
14	endoE, cpp	Endoglycosidase E (former corynebacterial protease CP40)	CULC809_01974	Trost et al. 2011, Tauch and Burkovski 2015	fig|945711.3.peg.2056	CP002790	2056	412	PLF_1716_00006954	PGF_01568722	2223192	2224430	bi (<->)	2320431.14.con.0001	2375	410	fig|2320431.14.peg.2375			Secreted Endo-beta-N-acetylglucosaminidase (EndoS)	0.815	0.961	bi (<->)	2320431.12.con.0001	2376	410	fig|2320431.12.peg.2376			Secreted Endo-beta-N-acetylglucosaminidase (EndoS)	0.815	0.961	bi (<->)	2320431.15.con.0001	2379	410	fig|2320431.15.peg.2379			Secreted Endo-beta-N-acetylglucosaminidase (EndoS)	0.815	0.961	bi (<->)	2320431.9.con.0001	2377	410	fig|2320431.9.peg.2377
15	mdbA	Thiol-disulfide oxidoreductase	DIP1880	Reardon-Robinson, Osipiuk and Jooya 2015, Tauch and Burkovski 2015	fig|257309.4.peg.1864	NC_002935	1864	244	PLF_1716_00012689	PGF_03049103	1923706	1924440	bi (<->)	2320431.14.con.0001	2087	238	fig|2320431.14.peg.2087			hypothetical protein	0.667	0.992	bi (<->)	2320431.12.con.0001	2086	238	fig|2320431.12.peg.2086			hypothetical protein	0.667	0.992	bi (<->)	2320431.15.con.0001	2091	238	fig|2320431.15.peg.2091			hypothetical protein	0.667	0.992	bi (<->)	2320431.9.con.0001	2088	238	fig|2320431.9.peg.2088
16	nanH	Sialidase (EC 3.2.1.18)	CULC809_00434	Trost et al. 2011	fig|945711.3.peg.457	CP002790	457	694	PLF_1716_00002393	PGF_02756458	475236	477320	bi (<->)	2320431.14.con.0001	543	688	fig|2320431.14.peg.543			Sialidase (EC 3.2.1.18)	0.727	0.999	bi (<->)	2320431.12.con.0001	545	688	fig|2320431.12.peg.545			Sialidase (EC 3.2.1.18)	0.727	0.999	bi (<->)	2320431.15.con.0001	545	688	fig|2320431.15.peg.545			Sialidase (EC 3.2.1.18)	0.727	0.999	bi (<->)	2320431.9.con.0001	539	688	fig|2320431.9.peg.539
17	nor	Nitric-oxide reductase (EC 1.7.99.7), quinol-dependent	cpfrc_00128	Trost et al. 2010	fig|765874.5.peg.130	NC_014329	130	766	PLF_1716_00001721	PGF_00025784	127534	129834
18	nrpS1	Nonribosomal peptide synthetase 1	cpfrc_00565	Trost et al. 2010	fig|765874.5.peg.594	NC_014329	594	1332	PLF_1716_00027230	PGF_10503453	591951	595949	bi (<->)	2320431.14.con.0001	727	1334	fig|2320431.14.peg.727			Polyketide synthase modules and related proteins	0.909	0.998	bi (<->)	2320431.12.con.0001	729	1334	fig|2320431.12.peg.729			Polyketide synthase modules and related proteins	0.909	0.998	bi (<->)	2320431.15.con.0001	729	1334	fig|2320431.15.peg.729			Polyketide synthase modules and related proteins	0.909	0.998	bi (<->)	2320431.9.con.0001	726	1334	fig|2320431.9.peg.726
19	nrpS2	Nonribosomal peptide synthetase 2	cpfrc_00180	Trost et al. 2010	fig|765874.5.peg.188	NC_014329	188	520	PLF_1716_00001892	PGF_08225224	191074	192636
20	pld	Phospholipase D	ET810_03855	Trost et al. 2011, Tauch and Burkovski 2015	fig|2320431.3.peg.1208	SDQO01000002	1208	307	PLF_1716_00029465	PGF_00143443	160998	161921	bi (<->)	2320431.14.con.0001	45	307	fig|2320431.14.peg.45			Phospholipase D precursor (EC 3.1.4.4) (PLD) (Choline phosphatase)	0.997	0.997	bi (<->)	2320431.12.con.0001	46	307	fig|2320431.12.peg.46			Phospholipase D precursor (EC 3.1.4.4) (PLD) (Choline phosphatase)	0.997	0.997	bi (<->)	2320431.15.con.0001	46	307	fig|2320431.15.peg.46			Phospholipase D precursor (EC 3.1.4.4) (PLD) (Choline phosphatase)	0.997	0.997	bi (<->)	2320431.9.con.0001	46	307	fig|2320431.9.peg.46
20	pld	Phospholipase D	cpfrc_00029	Trost et al. 2011, Tauch and Burkovski 2015	fig|765874.5.peg.26	NC_014329	26	307	PLF_1716_00027181	PGF_00143443	24113	25036	uni (->)	2320431.14.con.0001	45	307	fig|2320431.14.peg.45			Phospholipase D precursor (EC 3.1.4.4) (PLD) (Choline phosphatase)	0.873	0.997	uni (->)	2320431.12.con.0001	46	307	fig|2320431.12.peg.46			Phospholipase D precursor (EC 3.1.4.4) (PLD) (Choline phosphatase)	0.873	0.997	uni (->)	2320431.15.con.0001	46	307	fig|2320431.15.peg.46			Phospholipase D precursor (EC 3.1.4.4) (PLD) (Choline phosphatase)	0.873	0.997	uni (->)	2320431.9.con.0001	46	307	fig|2320431.9.peg.46
20	pld	Phospholipase D	CULC809_00040	Trost et al. 2011, Tauch and Burkovski 2015	fig|945711.3.peg.43	CP002790	43	307	PLF_1716_00029465	PGF_00143443	39510	40433	uni (->)	2320431.14.con.0001	45	307	fig|2320431.14.peg.45			Phospholipase D precursor (EC 3.1.4.4) (PLD) (Choline phosphatase)	0.961	0.997	uni (->)	2320431.12.con.0001	46	307	fig|2320431.12.peg.46			Phospholipase D precursor (EC 3.1.4.4) (PLD) (Choline phosphatase)	0.961	0.997	uni (->)	2320431.15.con.0001	46	307	fig|2320431.15.peg.46			Phospholipase D precursor (EC 3.1.4.4) (PLD) (Choline phosphatase)	0.961	0.997	uni (->)	2320431.9.con.0001	46	307	fig|2320431.9.peg.46
21	rbp	Shiga-like ribosome-binding protein	CDHC04_0155	Tauch and Burkovski 2015, Weerasekera et al. 2019	fig|698970.3.peg.168	CP003215	168	132	PLF_1716_00004841	PGF_01363142	155706	156104
21	rbp	Shiga-like ribosome-binding protein	CULC809_00177	Trost et al. 2011, Tauch and Burkovski 2015, Weerasekera et al. 2019	fig|945711.3.peg.189	CP002790	189	306	PLF_1716_00033486	PGF_01367813	187111	188031
22	rhuM	RhuM-like protein	CulFRC58_0285	Trost et al. 2011, Weerasekera et al. 2019	fig|1408268.58.peg.292	CP011913	292	333	PLF_1716_00026137	PGF_03298367	303772	304773
23	rpfA	Resuscitation-promoting factor A (muralytic enzyme)	cpfrc_00594	Trost et al. 2010	fig|765874.5.peg.623	NC_014329	623	207	PLF_1716_00093332	PGF_10561046	630815	631438	bi (<->)	2320431.14.con.0001	829	254	fig|2320431.14.peg.829			hypothetical protein	0.995	0.811	bi (<->)	2320431.12.con.0001	832	254	fig|2320431.12.peg.832			hypothetical protein	0.995	0.811	bi (<->)	2320431.15.con.0001	832	254	fig|2320431.15.peg.832			hypothetical protein	0.995	0.811	bi (<->)	2320431.9.con.0001	828	254	fig|2320431.9.peg.828
24	rpfB	Resuscitation-promoting factor B (muralytic enzyme)	cpfrc_00679	Trost et al. 2010	fig|765874.5.peg.711	NC_014329	711	383	PLF_1716_00002280	PGF_00410695	720160	721311	bi (<->)	2320431.14.con.0001	921	416	fig|2320431.14.peg.921			putative secreted protein	0.945	0.918	bi (<->)	2320431.12.con.0001	925	416	fig|2320431.12.peg.925			putative secreted protein	0.945	0.918	bi (<->)	2320431.15.con.0001	924	416	fig|2320431.15.peg.924			putative secreted protein	0.945	0.918	bi (<->)	2320431.9.con.0001	921	416	fig|2320431.9.peg.921
25	rpfI	Resuscitation-promoting factor-interacting protein	CULC809_01133	Trost et al. 2011, Tauch and Burkovski 2015	fig|945711.3.peg.1180	CP002790	1180	580	PLF_1716_00001449	PGF_08225224	1264754	1266496	bi (<->)	2320431.14.con.0001	1405	546	fig|2320431.14.peg.1405			hypothetical protein	0.956	0.496	bi (<->)	2320431.12.con.0001	1409	546	fig|2320431.12.peg.1409			hypothetical protein	0.956	0.496	bi (<->)	2320431.15.con.0001	1409	546	fig|2320431.15.peg.1409			hypothetical protein	0.956	0.496	bi (<->)	2320431.9.con.0001	1405	546	fig|2320431.9.peg.1405
26	spaB	Surface-anchored protein (minor pilus subunit)	CULC809_01980	Trost et al. 2011, Tauch and Burkovski 2015	fig|945711.3.peg.2062	CP002790	2062	241	PLF_1716_00010184	PGF_08225224	2234646	2235371	bi (<->)	2320431.14.con.0001	2382	255	fig|2320431.14.peg.2382			potential surface-anchored protein	0.813	0.929	bi (<->)	2320431.12.con.0001	2383	255	fig|2320431.12.peg.2383			potential surface-anchored protein	0.813	0.929	bi (<->)	2320431.15.con.0001	2386	255	fig|2320431.15.peg.2386			potential surface-anchored protein	0.813	0.929	bi (<->)	2320431.9.con.0001	2384	255	fig|2320431.9.peg.2384
27	spaC	Surface-anchored protein (tip pilus protein)	CULC809_01979	Trost et al. 2011, Tauch and Burkovski 2015	fig|945711.3.peg.2061	CP002790	2061	1852	PLF_1716_00004783	PGF_00219167	2229085	2234643	bi (<->)	2320431.14.con.0001	2381	1752	fig|2320431.14.peg.2381			hypothetical protein	0.863	0.992	bi (<->)	2320431.12.con.0001	2382	1752	fig|2320431.12.peg.2382			hypothetical protein	0.863	0.992	bi (<->)	2320431.15.con.0001	2385	1752	fig|2320431.15.peg.2385			hypothetical protein	0.863	0.992	bi (<->)	2320431.9.con.0001	2383	1752	fig|2320431.9.peg.2383
28	spaD	Surface-anchored protein (major pilus subunit)	CULC809_01952	Trost et al. 2011, Tauch and Burkovski 2015	fig|945711.3.peg.2033	CP002790	2033	517	PLF_1716_00090862	PGF_08225224	2193587	2195140	bi (<->)	2320431.14.con.0001	2340	389	fig|2320431.14.peg.2340			hypothetical protein	0.403	0.895	bi (<->)	2320431.12.con.0001	2341	389	fig|2320431.12.peg.2341			hypothetical protein	0.403	0.895	bi (<->)	2320431.15.con.0001	2345	389	fig|2320431.15.peg.2345			hypothetical protein	0.403	0.895	bi (<->)	2320431.9.con.0001	2342	389	fig|2320431.9.peg.2342
29	spaE	Surface-anchored protein (minor pilus subunit)	CULC809_01950	Trost et al. 2011, Tauch and Burkovski 2015	fig|945711.3.peg.2031	CP002790	2031	272	PLF_1716_00007274	PGF_00230659	2191576	2192394	bi (<->)	2320431.14.con.0001	2335	207	fig|2320431.14.peg.2335			hypothetical protein	0.383	0.986	bi (<->)	2320431.12.con.0001	2337	207	fig|2320431.12.peg.2337			hypothetical protein	0.383	0.986	bi (<->)	2320431.15.con.0001	2341	207	fig|2320431.15.peg.2341			hypothetical protein	0.383	0.986	bi (<->)	2320431.9.con.0001	2338	207	fig|2320431.9.peg.2338
30	spaF	Surface-anchored protein (tip pilus protein)	CULC809_01949	Trost et al. 2011, Tauch and Burkovski 2015	fig|945711.3.peg.2030	CP002790	2030	1215	PLF_1716_00006760	PGF_01381114	2187926	2191573	bi (<->)	2320431.14.con.0001	2331	555	fig|2320431.14.peg.2331			hypothetical protein	0.539	0.993	bi (<->)	2320431.12.con.0001	2333	555	fig|2320431.12.peg.2333			hypothetical protein	0.539	0.993	bi (<->)	2320431.15.con.0001	2337	555	fig|2320431.15.peg.2337			hypothetical protein	0.539	0.993
31	srtA	Sortase A	CULC809_01981	Trost et al. 2011, Tauch and Burkovski 2015	fig|945711.3.peg.2063	CP002790	2063	295	PLF_1716_00001972	PGF_08842081	2235406	2236293	bi (<->)	2320431.14.con.0001	2383	288	fig|2320431.14.peg.2383			Sortase A, LPXTG specific	0.859	0.983	bi (<->)	2320431.12.con.0001	2384	288	fig|2320431.12.peg.2384			Sortase A, LPXTG specific	0.859	0.983	bi (<->)	2320431.15.con.0001	2387	288	fig|2320431.15.peg.2387			Sortase A, LPXTG specific	0.859	0.983	bi (<->)	2320431.9.con.0001	2385	288	fig|2320431.9.peg.2385
32	srtB	Sortase B	CULC809_01953	Trost et al. 2011, Tauch and Burkovski 2015	fig|945711.3.peg.2034	CP002790	2034	295	PLF_1716_00001190	PGF_08842081	2195832	2196719	bi (<->)	2320431.14.con.0001	2342	262	fig|2320431.14.peg.2342			Sortase A, LPXTG specific	0.787	0.943	bi (<->)	2320431.12.con.0001	2343	262	fig|2320431.12.peg.2343			Sortase A, LPXTG specific	0.787	0.943	bi (<->)	2320431.15.con.0001	2347	262	fig|2320431.15.peg.2347			Sortase A, LPXTG specific	0.787	0.943	bi (<->)	2320431.9.con.0001	2344	262	fig|2320431.9.peg.2344
33	srtC	Sortase C	CULC809_01951	Trost et al. 2011, Tauch and Burkovski 2015	fig|945711.3.peg.2032	CP002790	2032	291	PLF_1716_00000898	PGF_08842081	2192394	2193269	bi (<->)	2320431.14.con.0001	2337	231	fig|2320431.14.peg.2337			Sortase A, LPXTG specific	0.652	0.991	bi (<->)	2320431.12.con.0001	2339	258	fig|2320431.12.peg.2339			Sortase A, LPXTG specific	0.649	0.891	bi (<->)	2320431.15.con.0001	2343	258	fig|2320431.15.peg.2343			Sortase A, LPXTG specific	0.649	0.891	bi (<->)	2320431.9.con.0001	2340	258	fig|2320431.9.peg.2340
34	tox	Diphtheria toxin (NAD(+)--diphthamide ADP- ribosyltransferase) (EC 2.4.2.36)	CULC0102_0213	Tauch and Burkovski 2015	fig|996634.5.peg.223	AP012284	223	560	PLF_1716_00005191	PGF_01380482	211802	213484	uni (->)	2320431.14.con.0001	245	560	fig|2320431.14.peg.245			Diphtheria toxin (NAD(+)--diphthamide ADP- ribosyltransferase) (EC 2.4.2.36)	0.945	0.998	uni (->)	2320431.12.con.0001	245	560	fig|2320431.12.peg.245			Diphtheria toxin (NAD(+)--diphthamide ADP- ribosyltransferase) (EC 2.4.2.36)	0.945	0.998	uni (->)	2320431.15.con.0001	246	560	fig|2320431.15.peg.246			Diphtheria toxin (NAD(+)--diphthamide ADP- ribosyltransferase) (EC 2.4.2.36)	0.945	0.998	uni (->)	2320431.9.con.0001	243	560	fig|2320431.9.peg.243
34	tox	Diphtheria toxin (NAD(+)--diphthamide ADP- ribosyltransferase) (EC 2.4.2.36)	DIP0222	Tauch and Burkovski 2015	fig|257309.4.peg.209	NC_002935	209	560	PLF_1716_00005191	PGF_01380482	188979	190661	bi (<->)	2320431.14.con.0001	245	560	fig|2320431.14.peg.245			Diphtheria toxin (NAD(+)--diphthamide ADP- ribosyltransferase) (EC 2.4.2.36)	0.975	0.998	bi (<->)	2320431.12.con.0001	245	560	fig|2320431.12.peg.245			Diphtheria toxin (NAD(+)--diphthamide ADP- ribosyltransferase) (EC 2.4.2.36)	0.975	0.998	bi (<->)	2320431.15.con.0001	246	560	fig|2320431.15.peg.246			Diphtheria toxin (NAD(+)--diphthamide ADP- ribosyltransferase) (EC 2.4.2.36)	0.975	0.998	bi (<->)	2320431.9.con.0001	243	560	fig|2320431.9.peg.243
34	tox	Diphtheria toxin (NAD(+)--diphthamide ADP- ribosyltransferase) (EC 2.4.2.36)	ET810_11840	Tauch and Burkovski 2015	fig|2320431.3.peg.1031	SDQO01000017	1031	569	PLF_1716_00005191	PGF_01380482	1124	2833	uni (->)	2320431.14.con.0001	245	560	fig|2320431.14.peg.245			Diphtheria toxin (NAD(+)--diphthamide ADP- ribosyltransferase) (EC 2.4.2.36)	0.996	0.979	uni (->)	2320431.12.con.0001	245	560	fig|2320431.12.peg.245			Diphtheria toxin (NAD(+)--diphthamide ADP- ribosyltransferase) (EC 2.4.2.36)	0.996	0.979	uni (->)	2320431.15.con.0001	246	560	fig|2320431.15.peg.246			Diphtheria toxin (NAD(+)--diphthamide ADP- ribosyltransferase) (EC 2.4.2.36)	0.996	0.979	uni (->)	2320431.9.con.0001	243	560	fig|2320431.9.peg.243
35	tspA	Trypsin-like serine protease	CULC809_01848	Trost et al. 2011	fig|945711.3.peg.1932	CP002790	1932	289	PLF_1716_00007827	PGF_08225224	2086407	2087276	uni (->)	2320431.14.con.0001	2361	300	fig|2320431.14.peg.2361			hypothetical protein	0.259	0.79	uni (->)	2320431.12.con.0001	2362	300	fig|2320431.12.peg.2362			hypothetical protein	0.259	0.79	uni (->)	2320431.15.con.0001	2366	300	fig|2320431.15.peg.2366			hypothetical protein	0.259	0.79	uni (->)	2320431.9.con.0001	2363	300	fig|2320431.9.peg.2363
36	vsp1	Venom serine protease	CULC809_00509	Trost et al. 2011	fig|945711.3.peg.532	CP002790	532	345	PLF_1716_00104602	PGF_08136826	551490	552527	bi (<->)	2320431.14.con.0001	626	139	fig|2320431.14.peg.626			trypsin-like serine protease	0.748	0.993	bi (<->)	2320431.12.con.0001	628	139	fig|2320431.12.peg.628			trypsin-like serine protease	0.748	0.993	bi (<->)	2320431.15.con.0001	628	139	fig|2320431.15.peg.628			trypsin-like serine protease	0.748	0.993	bi (<->)	2320431.9.con.0001	622	139	fig|2320431.9.peg.622
37	vsp2	Venom serine protease	CULC809_01964	Trost et al. 2011	fig|945711.3.peg.2046	CP002790	2046	292	PLF_1716_00015799	PGF_00090043	2210703	2211581	bi (<->)	2320431.14.con.0001	2361	300	fig|2320431.14.peg.2361			hypothetical protein	0.579	0.947	bi (<->)	2320431.12.con.0001	2362	300	fig|2320431.12.peg.2362			hypothetical protein	0.579	0.947	bi (<->)	2320431.15.con.0001	2366	300	fig|2320431.15.peg.2366			hypothetical protein	0.579	0.947	bi (<->)	2320431.9.con.0001	2363	300	fig|2320431.9.peg.2363
[truncated: 53 more columns]
