# Supplementary material for: Analysis of Corynebacterium silvaticum genomes from Portugal reveals a single cluster and a clade suggested to produce diphtheria toxin
Source: PeerJ. 2023 Mar 9;11:e14895. doi: 10.7717/peerj.14895 (PMC10008321; doi:10.7717/peerj.14895)
Supplement: Supplemental Information 15 [file peerj-11-14895-s015.xlsx]

## Sheet: Core genome
Virulence / Niche factor	Core genome (2,227)	Cs04-13	Cs05-13	Cs5182	CsKL0182	CsKL0183	CsKL0259	CsKL0260	CsKL0374	CsKL0382	CsKL0386	CsKL0394	CsKL0395	CsKL0396	CsKL0400	CsKL0401	CsKL0581	CsKL0598	CsKL0615	CsKL0707	CsKL0709	CsKL0773	CsKL0774	CsKL0882	CsKL0883	CsKL0884	CsKL0886	CsKL0887	CsKL0938	CsKL0957	CsKL0968	CsKL1003	CsKL1006	CsKL1007	CsKL1008	CsKL1009	CsKL1010	CsKL1196	CsPO100-5	CsPO101-5	CsPO102-5	CsPO104-5	CsPO105-5	CsPO25-4	CsPO38-4	CsPO39-4	CsW25
	1	65058.435.peg.136	65058.432.peg.120,65058.432.peg.2480	2320431.4.peg.689	2320431.3.peg.2658,2320431.3.peg.697	65058.401.peg.2176,65058.401.peg.685	65058.405.peg.1	65058.406.peg.2235,65058.406.peg.644	65058.410.peg.2229,65058.410.peg.688	65058.411.peg.2194,65058.411.peg.2625	65058.370.peg.1,65058.370.peg.1749	65058.373.peg.1,65058.373.peg.1749	65058.374.peg.1,65058.374.peg.1494	65058.375.peg.1,65058.375.peg.2280	65058.376.peg.682	65058.437.peg.1915,65058.437.peg.2593	65058.385.peg.2561,65058.385.peg.2584	65058.419.peg.1,65058.419.peg.1773	65058.361.peg.1958,65058.361.peg.687	65058.362.peg.1,65058.362.peg.2187	65058.363.peg.2123,65058.363.peg.691	65058.420.peg.2074,65058.420.peg.691	65058.421.peg.1,65058.421.peg.2255	65058.428.peg.1,65058.428.peg.1824	65058.426.peg.1,65058.426.peg.2015	65058.313.peg.2036,65058.313.peg.687	65058.314.peg.1116,65058.314.peg.1957	65058.315.peg.460	65058.316.peg.2279,65058.316.peg.688	2320456.3.peg.2568,2320456.3.peg.694	65058.317.peg.683	65058.318.peg.2097,65058.318.peg.648	65058.319.peg.2081,65058.319.peg.644	65058.320.peg.1,65058.320.peg.1807	65058.321.peg.1666,65058.321.peg.2514	65058.322.peg.2210,65058.322.peg.638	65058.323.peg.1598,65058.323.peg.645	65058.229.peg.1,65058.229.peg.2254	2320431.9.peg.1937	2320431.16.peg.1940	2320431.10.peg.1939	2320431.17.peg.1940	2320431.13.peg.1941	2320431.14.peg.1938	2320431.12.peg.1939	2320431.15.peg.1942	65058.241.peg.2497,65058.241.peg.74
	2	65058.435.peg.2	65058.432.peg.118	2320431.4.peg.2638	2320431.3.peg.1029	65058.401.peg.2610	65058.405.peg.2550	65058.406.peg.2618	65058.410.peg.2628	65058.411.peg.2622	65058.370.peg.2608	65058.373.peg.2608	65058.374.peg.2627	65058.375.peg.2632	65058.376.peg.2618	65058.437.peg.2619	65058.385.peg.2583	65058.419.peg.2626	65058.361.peg.2622	65058.362.peg.2624	65058.363.peg.2626	65058.420.peg.2631	65058.421.peg.2609	65058.428.peg.2608	65058.426.peg.2622	65058.313.peg.2624	65058.314.peg.2609	65058.315.peg.2608	65058.316.peg.2623	2320456.3.peg.1006	65058.317.peg.2623	65058.318.peg.2624	65058.319.peg.2623	65058.320.peg.2611	65058.321.peg.2614	65058.322.peg.2616	65058.323.peg.2622	65058.229.peg.1101	2320431.9.peg.1257,2320431.9.peg.2095,2320431.9.peg.2512,2320431.9.peg.820	2320431.16.peg.1260,2320431.16.peg.2095,2320431.16.peg.2512,2320431.16.peg.822	2320431.10.peg.1261,2320431.10.peg.2096,2320431.10.peg.2514,2320431.10.peg.823	2320431.17.peg.1261,2320431.17.peg.2097,2320431.17.peg.2511,2320431.17.peg.826	2320431.13.peg.1261,2320431.13.peg.2099,2320431.13.peg.2515,2320431.13.peg.823	2320431.14.peg.1258,2320431.14.peg.2094,2320431.14.peg.2508,2320431.14.peg.821	2320431.12.peg.1262,2320431.12.peg.2093,2320431.12.peg.2510,2320431.12.peg.824	2320431.15.peg.1262,2320431.15.peg.2098,2320431.15.peg.2514,2320431.15.peg.824	65058.241.peg.63
	3	65058.435.peg.1571	65058.432.peg.1236,65058.432.peg.1237	2320431.4.peg.2178	2320431.3.peg.1722	65058.401.peg.1550	65058.405.peg.1338	65058.406.peg.950	65058.410.peg.1068	65058.411.peg.1026	65058.370.peg.1250	65058.373.peg.1250	65058.374.peg.2111,65058.374.peg.2112	65058.375.peg.1157	65058.376.peg.1710,65058.376.peg.1711	65058.437.peg.1974,65058.437.peg.1975	65058.385.peg.1524,65058.385.peg.1525	65058.419.peg.1066	65058.361.peg.1662	65058.362.peg.717,65058.362.peg.718	65058.363.peg.723,65058.363.peg.724	65058.420.peg.1913,65058.420.peg.1914	65058.421.peg.2138	65058.428.peg.1644	65058.426.peg.1678	65058.313.peg.1155	65058.314.peg.2015	65058.315.peg.1713	65058.316.peg.1344	2320456.3.peg.2025	65058.317.peg.1193,65058.317.peg.1194	65058.318.peg.1305	65058.319.peg.1381,65058.319.peg.1382	65058.320.peg.1041,65058.320.peg.1042	65058.321.peg.1889	65058.322.peg.1395,65058.322.peg.1396	65058.323.peg.1830	65058.229.peg.717	2320431.9.peg.2200,2320431.9.peg.2201	2320431.16.peg.2201	2320431.10.peg.2201,2320431.10.peg.2202	2320431.17.peg.2202	2320431.13.peg.2204	2320431.14.peg.2197	2320431.12.peg.2199	2320431.15.peg.2203	65058.241.peg.1240
	4	65058.435.peg.1603	65058.432.peg.111	2320431.4.peg.2208	2320431.3.peg.1693	65058.401.peg.1519	65058.405.peg.1369	65058.406.peg.981	65058.410.peg.1036	65058.411.peg.995	65058.370.peg.1280	65058.373.peg.1280	65058.374.peg.2142	65058.375.peg.1127	65058.376.peg.1743	65058.437.peg.2007	65058.385.peg.1557	65058.419.peg.1035	65058.361.peg.1631	65058.362.peg.687	65058.363.peg.693	65058.420.peg.1944	65058.421.peg.2169	65058.428.peg.1674	65058.426.peg.1647	65058.313.peg.1124	65058.314.peg.2047	65058.315.peg.1744	65058.316.peg.1375	2320456.3.peg.1993	65058.317.peg.1162	65058.318.peg.1336	65058.319.peg.1351	65058.320.peg.1010	65058.321.peg.1920	65058.322.peg.1427	65058.323.peg.1799	65058.229.peg.746	2320431.9.peg.2170,2320431.9.peg.236	2320431.16.peg.2170,2320431.16.peg.238	2320431.10.peg.2171,2320431.10.peg.237	2320431.17.peg.2171,2320431.17.peg.240	2320431.13.peg.2174,2320431.13.peg.239	2320431.14.peg.2168,2320431.14.peg.238	2320431.12.peg.2168,2320431.12.peg.238	2320431.15.peg.2172,2320431.15.peg.239	65058.241.peg.1208
	5	65058.435.peg.8	65058.432.peg.109	2320431.4.peg.2640	2320431.3.peg.1037	65058.401.peg.2478	65058.405.peg.2486	65058.406.peg.2478	65058.410.peg.2474	65058.411.peg.2437	65058.370.peg.2079	65058.373.peg.2079	65058.374.peg.2307	65058.375.peg.2567	65058.376.peg.2429	65058.437.peg.2101	65058.385.peg.2101	65058.419.peg.2391	65058.361.peg.2338	65058.362.peg.2489	65058.363.peg.2370	65058.420.peg.2432	65058.421.peg.2417	65058.428.peg.2398	65058.426.peg.2433	65058.313.peg.2626	65058.314.peg.2473	65058.315.peg.800	65058.316.peg.2454	2320456.3.peg.1014	65058.317.peg.2492	65058.318.peg.2398	65058.319.peg.2261	65058.320.peg.2051	65058.321.peg.2079	65058.322.peg.2372	65058.323.peg.2049	65058.229.peg.1461	2320431.9.peg.2168,2320431.9.peg.238	2320431.16.peg.2168,2320431.16.peg.240	2320431.10.peg.2169,2320431.10.peg.239	2320431.17.peg.2169,2320431.17.peg.242	2320431.13.peg.2172,2320431.13.peg.241	2320431.14.peg.2166,2320431.14.peg.240	2320431.12.peg.2166,2320431.12.peg.240	2320431.15.peg.2170,2320431.15.peg.241	65058.241.peg.70
	6	65058.435.peg.9	65058.432.peg.108	2320431.4.peg.2641	2320431.3.peg.1036	65058.401.peg.2479	65058.405.peg.2485	65058.406.peg.2477	65058.410.peg.2473	65058.411.peg.2436	65058.370.peg.2078	65058.373.peg.2078	65058.374.peg.2306	65058.375.peg.2566	65058.376.peg.2430	65058.437.peg.2102	65058.385.peg.2102	65058.419.peg.2390	65058.361.peg.2339	65058.362.peg.2490	65058.363.peg.2369	65058.420.peg.2431	65058.421.peg.2416	65058.428.peg.2399	65058.426.peg.2434	65058.313.peg.2627	65058.314.peg.2474	65058.315.peg.801	65058.316.peg.2455	2320456.3.peg.1013	65058.317.peg.2493	65058.318.peg.2399	65058.319.peg.2262	65058.320.peg.2050	65058.321.peg.2078	65058.322.peg.2371	65058.323.peg.2048	65058.229.peg.1460	2320431.9.peg.2167,2320431.9.peg.239	2320431.16.peg.2167,2320431.16.peg.241	2320431.10.peg.2168,2320431.10.peg.240	2320431.17.peg.2168,2320431.17.peg.243	2320431.13.peg.2171,2320431.13.peg.242	2320431.14.peg.2165,2320431.14.peg.241	2320431.12.peg.2165,2320431.12.peg.241	2320431.15.peg.2169,2320431.15.peg.242	65058.241.peg.71
	7	65058.435.peg.1942	65058.432.peg.2459	2320431.4.peg.2548	2320431.3.peg.1377	65058.401.peg.1026	65058.405.peg.1392	65058.406.peg.1951	65058.410.peg.1661	65058.411.peg.1350	65058.370.peg.1429	65058.373.peg.1429	65058.374.peg.1629	65058.375.peg.2121	65058.376.peg.1934	65058.437.peg.1485	65058.385.peg.1815	65058.419.peg.1921	65058.361.peg.1369	65058.362.peg.1046	65058.363.peg.1614	65058.420.peg.1324	65058.421.peg.1699	65058.428.peg.2199	65058.426.peg.1373	65058.313.peg.1479	65058.314.peg.1643	65058.315.peg.778	65058.316.peg.1713	2320456.3.peg.1399	65058.317.peg.2160	65058.318.peg.1908	65058.319.peg.1862	65058.320.peg.1190	65058.321.peg.1345	65058.322.peg.1757	65058.323.peg.1246	65058.229.peg.1484	2320431.9.peg.214,2320431.9.peg.215	2320431.16.peg.216,2320431.16.peg.217	2320431.10.peg.215,2320431.10.peg.216	2320431.17.peg.218,2320431.17.peg.219	2320431.13.peg.217,2320431.13.peg.218	2320431.14.peg.216,2320431.14.peg.217	2320431.12.peg.217	2320431.15.peg.217,2320431.15.peg.218	65058.241.peg.1567
	8	65058.435.peg.2251,65058.435.peg.6	65058.432.peg.117,65058.432.peg.2122	2320431.4.peg.914	2320431.3.peg.1033,2320431.3.peg.1691	65058.401.peg.1333	65058.405.peg.2018	65058.406.peg.2616	65058.410.peg.2592	65058.411.peg.2598	65058.370.peg.2399	65058.373.peg.2399	65058.374.peg.2559	65058.375.peg.1462	65058.376.peg.1236	65058.437.peg.2484	65058.385.peg.2469	65058.419.peg.2558	65058.361.peg.2576	65058.362.peg.2594	65058.363.peg.2121	65058.420.peg.2608	65058.421.peg.2419	65058.428.peg.972	65058.426.peg.2538	65058.313.peg.2490	65058.314.peg.2360	65058.315.peg.2479	65058.316.peg.2586	2320456.3.peg.1007,2320456.3.peg.980	65058.317.peg.1789	65058.318.peg.1625	65058.319.peg.2609	65058.320.peg.2403	65058.321.peg.2460	65058.322.peg.2531	65058.323.peg.2425	65058.229.peg.1038,65058.229.peg.1102	2320431.9.peg.245	2320431.16.peg.247	2320431.10.peg.246	2320431.17.peg.249	2320431.13.peg.248	2320431.14.peg.247	2320431.12.peg.247	2320431.15.peg.248	65058.241.peg.2197,65058.241.peg.65
	9	65058.435.peg.417	65058.432.peg.398	2320431.4.peg.411,2320431.4.peg.884	2320431.3.peg.418	65058.401.peg.411	65058.405.peg.276	65058.406.peg.370	65058.410.peg.411	65058.411.peg.371	65058.370.peg.275	65058.373.peg.275	65058.374.peg.279	65058.375.peg.280	65058.376.peg.411	65058.437.peg.257	65058.385.peg.368	65058.419.peg.276	65058.361.peg.412	65058.362.peg.276	65058.363.peg.413	65058.420.peg.416	65058.421.peg.276	65058.428.peg.276	65058.426.peg.277	65058.313.peg.412	65058.314.peg.99	65058.315.peg.185	65058.316.peg.413	2320456.3.peg.417	65058.317.peg.409	65058.318.peg.370	65058.319.peg.369	65058.320.peg.279	65058.321.peg.114	65058.322.peg.362	65058.323.peg.369	65058.229.peg.286	2320431.9.peg.1665	2320431.16.peg.1667	2320431.10.peg.1668	2320431.17.peg.1669	2320431.13.peg.1669	2320431.14.peg.1666	2320431.12.peg.1668	2320431.15.peg.1669	65058.241.peg.358
	10	65058.435.peg.917	65058.432.peg.1116,65058.432.peg.1117	2320431.4.peg.1524	2320431.3.peg.1979	65058.401.peg.1804	65058.405.peg.945	65058.406.peg.1668	65058.410.peg.775	65058.411.peg.907	65058.370.peg.1363	65058.373.peg.1363	65058.374.peg.1135	65058.375.peg.779	65058.376.peg.893	65058.437.peg.1700	65058.385.peg.724	65058.419.peg.947	65058.361.peg.948	65058.362.peg.2107	65058.363.peg.1070	65058.420.peg.778	65058.421.peg.1034	65058.428.peg.1230	65058.426.peg.775	65058.313.peg.1036	65058.314.peg.1029	65058.315.peg.1789	65058.316.peg.775	2320456.3.peg.1280	65058.317.peg.1073	65058.318.peg.911	65058.319.peg.904	65058.320.peg.1499	65058.321.peg.1111	65058.322.peg.1507	65058.323.peg.1146	65058.229.peg.1194	2320431.9.peg.911	2320431.16.peg.912	2320431.10.peg.915	2320431.17.peg.916	2320431.13.peg.913	2320431.14.peg.911	2320431.12.peg.915	2320431.15.peg.914	65058.241.peg.858
	11	65058.435.peg.982	65058.432.peg.1053	2320431.4.peg.1589	2320431.3.peg.2045	65058.401.peg.1868	65058.405.peg.881	65058.406.peg.1733	65058.410.peg.840	65058.411.peg.842	65058.370.peg.1299	65058.373.peg.1299	65058.374.peg.1070	65058.375.peg.843	65058.376.peg.958	65058.437.peg.1634	65058.385.peg.788	65058.419.peg.883	65058.361.peg.884	65058.362.peg.2172	65058.363.peg.1135	65058.420.peg.842	65058.421.peg.969	65058.428.peg.1165	65058.426.peg.839,65058.426.peg.846	65058.313.peg.972	65058.314.peg.964	65058.315.peg.1854	65058.316.peg.839	2320456.3.peg.1213	65058.317.peg.1009	65058.318.peg.847	65058.319.peg.840	65058.320.peg.1564	65058.321.peg.1047	65058.322.peg.1442	65058.323.peg.1211	65058.229.peg.1258	2320431.9.peg.975	2320431.16.peg.976	2320431.10.peg.978	2320431.17.peg.979	2320431.13.peg.977	2320431.14.peg.974	2320431.12.peg.979	2320431.15.peg.978	65058.241.peg.923
	12	65058.435.peg.1036	65058.432.peg.996	2320431.4.peg.1644	2320431.3.peg.2213	65058.401.peg.1375	65058.405.peg.827	65058.406.peg.1788	65058.410.peg.895	65058.411.peg.787	65058.370.peg.842	65058.373.peg.842	65058.374.peg.915	65058.375.peg.898	65058.376.peg.1013	65058.437.peg.1011	65058.385.peg.2009,65058.385.peg.495	65058.419.peg.827	65058.361.peg.829	65058.362.peg.1979	65058.363.peg.1191	65058.420.peg.897	65058.421.peg.914	65058.428.peg.1347	65058.426.peg.895	65058.313.peg.917	65058.314.peg.913	65058.315.peg.1023	65058.316.peg.895	2320456.3.peg.1159	65058.317.peg.953	65058.318.peg.792	65058.319.peg.786	65058.320.peg.979	65058.321.peg.893	65058.322.peg.1203	65058.323.peg.1029	65058.229.peg.1313	2320431.9.peg.1032	2320431.16.peg.1033	2320431.10.peg.1035	2320431.17.peg.1036	2320431.13.peg.1034	2320431.14.peg.1031	2320431.12.peg.1035	2320431.15.peg.1034	65058.241.peg.977
	13	65058.435.peg.1052	65058.432.peg.980	2320431.4.peg.1660	2320431.3.peg.2197	65058.401.peg.1392	65058.405.peg.811	65058.406.peg.1804	65058.410.peg.911	65058.411.peg.771	65058.370.peg.858	65058.373.peg.858	65058.374.peg.931	65058.375.peg.11,65058.375.peg.914	65058.376.peg.1029	65058.437.peg.995	65058.385.peg.511	65058.419.peg.811	65058.361.peg.813	65058.362.peg.1963	65058.363.peg.1207	65058.420.peg.913	65058.421.peg.897	65058.428.peg.1363	65058.426.peg.911	65058.313.peg.901	65058.314.peg.897	65058.315.peg.1006	65058.316.peg.911	2320456.3.peg.1143	65058.317.peg.937	65058.318.peg.776	65058.319.peg.770	65058.320.peg.963	65058.321.peg.909	65058.322.peg.1187	65058.323.peg.1013	65058.229.peg.1329	2320431.9.peg.1048	2320431.16.peg.1049	2320431.10.peg.1051	2320431.17.peg.1052	2320431.13.peg.1050	2320431.14.peg.1047	2320431.12.peg.1051	2320431.15.peg.1050	65058.241.peg.993
	14	65058.435.peg.1077	65058.432.peg.955	2320431.4.peg.1685	2320431.3.peg.1403,2320431.3.peg.2172	65058.401.peg.1417	65058.405.peg.786	65058.406.peg.1829	65058.410.peg.936	65058.411.peg.746	65058.370.peg.883	65058.373.peg.883	65058.374.peg.956	65058.375.peg.939	65058.376.peg.1054	65058.437.peg.970	65058.385.peg.536	65058.419.peg.786	65058.361.peg.788	65058.362.peg.1938	65058.363.peg.1232	65058.420.peg.938	65058.421.peg.872	65058.428.peg.1388	65058.426.peg.936	65058.313.peg.876	65058.314.peg.872	65058.315.peg.981	65058.316.peg.936	2320456.3.peg.1118	65058.317.peg.912	65058.318.peg.751	65058.319.peg.745	65058.320.peg.938	65058.321.peg.934	65058.322.peg.1162	65058.323.peg.988	65058.229.peg.1354	2320431.9.peg.1073	2320431.16.peg.1074	2320431.10.peg.1076	2320431.17.peg.1077	2320431.13.peg.1075	2320431.14.peg.1072	2320431.12.peg.1076	2320431.15.peg.1075	65058.241.peg.1018
	15	65058.435.peg.1212	65058.432.peg.821	2320431.4.peg.1821	2320431.3.peg.1402,2320431.3.peg.733	65058.401.peg.2335	65058.405.peg.2381	65058.406.peg.2269	65058.410.peg.2279	65058.411.peg.2244	65058.370.peg.1611	65058.373.peg.1611	65058.374.peg.1921	65058.375.peg.1075	65058.376.peg.1186	65058.437.peg.1794	65058.385.peg.1886	65058.419.peg.2089	65058.361.peg.2124	65058.362.peg.2347	65058.363.peg.1996	65058.420.peg.2221	65058.421.peg.737	65058.428.peg.2270	65058.426.peg.2291	65058.313.peg.738	65058.314.peg.514	65058.315.peg.2009	65058.316.peg.2312	2320456.3.peg.2531	65058.317.peg.2365	65058.318.peg.2258	65058.319.peg.2045	65058.320.peg.2075	65058.321.peg.1514	65058.322.peg.2079	65058.323.peg.2143	65058.229.peg.2524	2320431.9.peg.1205	2320431.16.peg.1207	2320431.10.peg.1209	2320431.17.peg.1209	2320431.13.peg.1208	2320431.14.peg.1205	2320431.12.peg.1210	2320431.15.peg.1209	65058.241.peg.1156
	16	65058.435.peg.1279	65058.432.peg.1529	2320431.4.peg.1888	2320431.3.peg.2259	65058.401.peg.2057	65058.405.peg.1050	65058.406.peg.661	65058.410.peg.1359	65058.411.peg.1312	65058.370.peg.999	65058.373.peg.999	65058.374.peg.2037	65058.375.peg.1445	65058.376.peg.2319	65058.437.peg.1364	65058.385.peg.1074	65058.419.peg.1357	65058.361.peg.1975	65058.362.peg.1008	65058.363.peg.1009	65058.420.peg.1756	65058.421.peg.1737	65058.428.peg.1692	65058.426.peg.2240	65058.313.peg.1441	65058.314.peg.1292	65058.315.peg.1891	65058.316.peg.1054	2320456.3.peg.2465	65058.317.peg.1485	65058.318.peg.1015	65058.319.peg.1824	65058.320.peg.1438	65058.321.peg.1213	65058.322.peg.2013	65058.323.peg.2499	65058.229.peg.2641	2320431.9.peg.2495	2320431.16.peg.2495	2320431.10.peg.2497	2320431.17.peg.2494	2320431.13.peg.2498	2320431.14.peg.2491	2320431.12.peg.2493	2320431.15.peg.2495,2320431.15.peg.2497	65058.241.peg.1530
	17	65058.435.peg.1343	65058.432.peg.1463	2320431.4.peg.1952	2320431.3.peg.1039,2320431.3.peg.2323	65058.401.peg.2119	65058.405.peg.1114	65058.406.peg.725	65058.410.peg.1294	65058.411.peg.1248	65058.370.peg.1063	65058.373.peg.1063	65058.374.peg.1973	65058.375.peg.1381	65058.376.peg.2254	65058.437.peg.1427	65058.385.peg.1011	65058.419.peg.1293	65058.361.peg.2037	65058.362.peg.943	65058.363.peg.946	65058.420.peg.1692	65058.421.peg.1797	65058.428.peg.1755	65058.426.peg.2177	65058.313.peg.1378	65058.314.peg.1357	65058.315.peg.1955	65058.316.peg.1118	2320456.3.peg.2399	65058.317.peg.1420	65058.318.peg.1079	65058.319.peg.1760	65058.320.peg.1374	65058.321.peg.1277	65058.322.peg.1950	65058.323.peg.2053	65058.229.peg.2577	2320431.9.peg.2428	2320431.16.peg.2428	2320431.10.peg.2430	2320431.17.peg.2428	2320431.13.peg.2431	2320431.14.peg.2425	2320431.12.peg.2426	2320431.15.peg.2431	65058.241.peg.1465
	18	65058.435.peg.1670	65058.432.peg.2187	2320431.4.peg.2277	2320431.3.peg.1105	65058.401.peg.751	65058.405.peg.1664,65058.405.peg.977	65058.406.peg.1297	65058.410.peg.1387	65058.411.peg.1622	65058.370.peg.1658	65058.373.peg.1658	65058.374.peg.1766	65058.375.peg.1814	65058.376.peg.2092	65058.437.peg.1208	65058.385.peg.1303	65058.419.peg.1683	65058.361.peg.1099	65058.362.peg.1318	65058.363.peg.1343	65058.420.peg.1050	65058.421.peg.1946	65058.428.peg.1962	65058.426.peg.1102	65058.313.peg.1753	65058.314.peg.1405	65058.315.peg.1509	65058.316.peg.1443	2320456.3.peg.1674	65058.317.peg.1904	65058.318.peg.1637	65058.319.peg.1090	65058.320.peg.1692	65058.321.peg.1575	65058.322.peg.945	65058.323.peg.1708	65058.229.peg.1760	2320431.9.peg.2578	2320431.16.peg.2581	2320431.10.peg.2580	2320431.17.peg.2578	2320431.13.peg.2584	2320431.14.peg.2575	2320431.12.peg.2577	2320431.15.peg.2581	65058.241.peg.1842
	19	65058.435.peg.1768	65058.432.peg.2283,65058.432.peg.2284	2320431.4.peg.2375	2320431.3.peg.1202	65058.401.peg.847	65058.405.peg.1567	65058.406.peg.1394	65058.410.peg.1485	65058.411.peg.1525	65058.370.peg.2514	65058.373.peg.2514	65058.374.peg.1669	65058.375.peg.1912	65058.376.peg.2189	65058.437.peg.1304	65058.385.peg.2462	65058.419.peg.2551	65058.361.peg.1195	65058.362.peg.1220	65058.363.peg.1439	65058.420.peg.1145	65058.421.peg.1525	65058.428.peg.2058	65058.426.peg.1199	65058.313.peg.1655	65058.314.peg.1502	65058.315.peg.2279	65058.316.peg.1540	2320456.3.peg.1575	65058.317.peg.1807	65058.318.peg.1734	65058.319.peg.992	65058.320.peg.1596	65058.321.peg.2382	65058.322.peg.1041	65058.323.peg.2476	65058.229.peg.1661	2320431.9.peg.40	2320431.16.peg.40	2320431.10.peg.40	2320431.17.peg.40	2320431.13.peg.40	2320431.14.peg.39	2320431.12.peg.40	2320431.15.peg.40	65058.241.peg.1742
	20	65058.435.peg.1789	65058.432.peg.2308,65058.432.peg.2309	2320431.4.peg.2396	2320431.3.peg.1223	65058.401.peg.870	65058.405.peg.1543	65058.406.peg.2103	65058.410.peg.1508	65058.411.peg.1503	65058.370.peg.2577	65058.373.peg.2577	65058.374.peg.2563	65058.375.peg.2275	65058.376.peg.2212	65058.437.peg.1327	65058.385.peg.2535	65058.419.peg.2529	65058.361.peg.1218	65058.362.peg.1197	65058.363.peg.1462	65058.420.peg.1169	65058.421.peg.1548	65058.428.peg.2602	65058.426.peg.1222	65058.313.peg.1631	65058.314.peg.2604	65058.315.peg.2255	65058.316.peg.1562	2320456.3.peg.1554	65058.317.peg.2312	65058.318.peg.1757	65058.319.peg.969	65058.320.peg.2605	65058.321.peg.2405	65058.322.peg.1910	65058.323.peg.2510	65058.229.peg.1640	2320431.9.peg.65	2320431.16.peg.65	2320431.10.peg.64	2320431.17.peg.65	2320431.13.peg.65	2320431.14.peg.64	2320431.12.peg.64	2320431.15.peg.65	65058.241.peg.1721
	21	65058.435.peg.1980	65058.432.peg.1852	2320431.4.peg.1189	2320431.3.peg.1421	65058.401.peg.1063	65058.405.peg.1746	65058.406.peg.999	65058.410.peg.1698	65058.411.peg.1881	65058.370.peg.633	65058.373.peg.633	65058.374.peg.707	65058.375.peg.1733	65058.376.peg.1506	65058.437.peg.852	65058.385.peg.2187	65058.419.peg.1390	65058.361.peg.1405	65058.362.peg.1399	65058.363.peg.1817	65058.420.peg.1362	65058.421.peg.1136	65058.428.peg.705	65058.426.peg.1410	65058.313.peg.2216	65058.314.peg.2549,65058.314.peg.556	65058.315.peg.1069	65058.316.peg.1750	2320456.3.peg.1976	65058.317.peg.1518	65058.318.peg.1354	65058.319.peg.1334	65058.320.peg.656	65058.321.peg.684	65058.322.peg.864	65058.323.peg.662	65058.229.peg.2064	2320431.9.peg.513	2320431.16.peg.517	2320431.10.peg.514	2320431.17.peg.520	2320431.13.peg.518	2320431.14.peg.516	2320431.12.peg.518	2320431.15.peg.518	65058.241.peg.1925
	22	65058.435.peg.2211	65058.432.peg.2082	2320431.4.peg.955	2320431.3.peg.1650	65058.401.peg.1293	65058.405.peg.1977	65058.406.peg.1227	65058.410.peg.1927	65058.411.peg.1651	65058.370.peg.2189	65058.373.peg.2189	65058.374.peg.2369	65058.375.peg.1502	65058.376.peg.1277	65058.437.peg.2599	65058.385.peg.2510	65058.419.peg.2599	65058.361.peg.2603	65058.362.peg.1629	65058.363.peg.2081	65058.420.peg.1592	65058.421.peg.2459	65058.428.peg.932	65058.426.peg.1640	65058.313.peg.2450	65058.314.peg.2586	65058.315.peg.2587	65058.316.peg.1979	2320456.3.peg.1376,2320456.3.peg.1746	65058.317.peg.1748	65058.318.peg.1585	65058.319.peg.2400	65058.320.peg.2493	65058.321.peg.2564	65058.322.peg.2584	65058.323.peg.2600	65058.229.peg.1832	2320431.9.peg.285	2320431.16.peg.287	2320431.10.peg.286	2320431.17.peg.289	2320431.13.peg.288	2320431.14.peg.287	2320431.12.peg.287	2320431.15.peg.289	65058.241.peg.2156
C. diphtheriae DIP0733 homolog (CULC22_00609)	23	65058.435.peg.2384	65058.432.peg.1644	2320431.4.peg.1398	2320431.3.peg.1399,2320431.3.peg.2492	65058.401.peg.2013	65058.405.peg.2057	65058.406.peg.1543	65058.410.peg.2064	65058.411.peg.2029	65058.370.peg.2119	65058.373.peg.2119	65058.374.peg.1327	65058.375.peg.2061	65058.376.peg.1783	65058.437.peg.1170	65058.385.peg.1200	65058.419.peg.2430	65058.361.peg.2427	65058.362.peg.1800	65058.363.peg.2410	65058.420.peg.2452	65058.421.peg.1390	65058.428.peg.1011	65058.426.peg.1883	65058.313.peg.2269	65058.314.peg.2158	65058.315.peg.1380	65058.316.peg.2023	2320456.3.peg.2324	65058.317.peg.2008	65058.318.peg.1967	65058.319.peg.1678	65058.320.peg.2128	65058.321.peg.2119	65058.322.peg.1632	65058.323.peg.1480	65058.229.peg.2214	2320431.9.peg.721	2320431.16.peg.722	2320431.10.peg.724	2320431.17.peg.726	2320431.13.peg.723	2320431.14.peg.722	2320431.12.peg.724	2320431.15.peg.724	65058.241.peg.2237
Nonribosomal peptide synthetase 1 (nrpS1) (cpfrc_00565)	24	65058.435.peg.2390	65058.432.peg.1638	2320431.4.peg.1404	2320431.3.peg.2498	65058.401.peg.2019	65058.405.peg.1285,65058.405.peg.2051	65058.406.peg.1549	65058.410.peg.2070	65058.411.peg.2034	65058.370.peg.2113	65058.373.peg.2113	65058.374.peg.1333	65058.375.peg.2067	65058.376.peg.1777	65058.437.peg.1176	65058.385.peg.1206	65058.419.peg.2425	65058.361.peg.2433	65058.362.peg.1806	65058.363.peg.2404	65058.420.peg.2458	65058.421.peg.1384	65058.428.peg.1005	65058.426.peg.1877	65058.313.peg.2264	65058.314.peg.2152	65058.315.peg.1386	65058.316.peg.2017	2320456.3.peg.2330	65058.317.peg.2002	65058.318.peg.1962	65058.319.peg.1684	65058.320.peg.2134	65058.321.peg.2113	65058.322.peg.1626	65058.323.peg.1486	65058.229.peg.2220	2320431.9.peg.726	2320431.16.peg.727	2320431.10.peg.729	2320431.17.peg.731	2320431.13.peg.728	2320431.14.peg.727	2320431.12.peg.729	2320431.15.peg.729	65058.241.peg.2231
	25	65058.435.peg.2482	65058.432.peg.1596	2320431.4.peg.879	2320431.3.peg.847	65058.401.peg.2449,65058.401.peg.405	65058.405.peg.2303	65058.406.peg.2381	65058.410.peg.2375	65058.411.peg.2341	65058.370.peg.1945	65058.373.peg.1945	65058.374.peg.2171	65058.375.peg.2471	65058.376.peg.2363	65058.437.peg.2072	65058.385.peg.2037	65058.419.peg.2294	65058.361.peg.2309	65058.362.peg.2460	65058.363.peg.2237	65058.420.peg.2298	65058.421.peg.2319	65058.428.peg.2369	65058.426.peg.2368	65058.313.peg.1844	65058.314.peg.1758	65058.315.peg.2085	65058.316.peg.2389	2320456.3.peg.722	65058.317.peg.2427	65058.318.peg.2335	65058.319.peg.2232	65058.320.peg.1954	65058.321.peg.1949	65058.322.peg.2238	65058.323.peg.1915	65058.229.peg.811	2320431.9.peg.768	2320431.16.peg.769	2320431.10.peg.771	2320431.17.peg.773	2320431.13.peg.770	2320431.14.peg.769	2320431.12.peg.771	2320431.15.peg.771	65058.241.peg.2525
	26	65058.435.peg.2558	65058.432.peg.2617	2320431.4.peg.2617	2320431.3.peg.1404,2320431.3.peg.923	65058.401.peg.2500	65058.405.peg.2464	65058.406.peg.2456	65058.410.peg.2451	65058.411.peg.2416	65058.370.peg.2057	65058.373.peg.2057	65058.374.peg.2283	65058.375.peg.2546	65058.376.peg.2450	65058.437.peg.2124	65058.385.peg.2125	65058.419.peg.2368	65058.361.peg.2361	65058.362.peg.2511	65058.363.peg.2347	65058.420.peg.2409	65058.421.peg.2394	65058.428.peg.2419	65058.426.peg.2454	65058.313.peg.2512	65058.314.peg.2279	65058.315.peg.823	65058.316.peg.2476	2320456.3.peg.804	65058.317.peg.2513	65058.318.peg.2419	65058.319.peg.2284	65058.320.peg.2029	65058.321.peg.2058	65058.322.peg.2349	65058.323.peg.2026	65058.229.peg.886	2320431.9.peg.2144	2320431.16.peg.2145	2320431.10.peg.2146	2320431.17.peg.2147	2320431.13.peg.2149	2320431.14.peg.2144	2320431.12.peg.2143	2320431.15.peg.2147	65058.241.peg.2637
	27	65058.435.peg.2577	65058.432.peg.1774	2320431.4.peg.1266	2320431.3.peg.976	65058.401.peg.2548	65058.405.peg.2548	65058.406.peg.2540	65058.410.peg.2530	65058.411.peg.2571	65058.370.peg.2398	65058.373.peg.2398	65058.374.peg.2488	65058.375.peg.2569	65058.376.peg.2555	65058.437.peg.2449	65058.385.peg.2443	65058.419.peg.2510	65058.361.peg.2466	65058.362.peg.1669	65058.363.peg.2543	65058.420.peg.2552	65058.421.peg.2549	65058.428.peg.2522	65058.426.peg.2536	65058.313.peg.2622	65058.314.peg.2359	65058.315.peg.2444	65058.316.peg.2585	2320456.3.peg.1004,2320456.3.peg.914	65058.317.peg.2561	65058.318.peg.2563	65058.319.peg.2332	65058.320.peg.2402	65058.321.peg.2340	65058.322.peg.2449	65058.323.peg.2390	65058.229.peg.1003	2320431.9.peg.590	2320431.16.peg.595	2320431.10.peg.592	2320431.17.peg.598	2320431.13.peg.595	2320431.14.peg.594	2320431.12.peg.596	2320431.15.peg.596	65058.241.peg.61
	28	65058.435.peg.12	65058.432.peg.38	2320431.4.peg.815	2320431.3.peg.2532	65058.401.peg.2300	65058.405.peg.2238	65058.406.peg.2108	65058.410.peg.2103	65058.411.peg.2067	65058.370.peg.2284	65058.373.peg.2284	65058.374.peg.1366	65058.375.peg.2407	65058.376.peg.806	65058.437.peg.2336	65058.385.peg.2289	65058.419.peg.1899	65058.361.peg.1830	65058.362.peg.2313	65058.363.peg.2582	65058.420.peg.1947	65058.421.peg.2476	65058.428.peg.1950	65058.426.peg.2140	65058.313.peg.1908	65058.314.peg.1694	65058.315.peg.2369	65058.316.peg.2153	2320456.3.peg.944	65058.317.peg.809	65058.318.peg.2224	65058.319.peg.2531	65058.320.peg.2366	65058.321.peg.2338	65058.322.peg.2446	65058.323.peg.2298	65058.229.peg.2379	2320431.9.peg.2064	2320431.16.peg.2066	2320431.10.peg.2065	2320431.17.peg.2067	2320431.13.peg.2069	2320431.14.peg.2064	2320431.12.peg.2064	2320431.15.peg.2068	65058.241.peg.2372
	29	65058.435.peg.13	65058.432.peg.37	2320431.4.peg.814	2320431.3.peg.2533	65058.401.peg.2299	65058.405.peg.2237	65058.406.peg.2109	65058.410.peg.2104	65058.411.peg.2068	65058.370.peg.2285	65058.373.peg.2285	65058.374.peg.1367	65058.375.peg.2406	65058.376.peg.805	65058.437.peg.2337	65058.385.peg.2290	65058.419.peg.1898	65058.361.peg.1831	65058.362.peg.2312	65058.363.peg.2581	65058.420.peg.1948	65058.421.peg.2477	65058.428.peg.1949	65058.426.peg.2139	65058.313.peg.1909	65058.314.peg.1693	65058.315.peg.2370	65058.316.peg.2154	2320456.3.peg.943	65058.317.peg.808	65058.318.peg.2223	65058.319.peg.2530	65058.320.peg.2365	65058.321.peg.2337	65058.322.peg.2445	65058.323.peg.2299	65058.229.peg.2378	2320431.9.peg.2063	2320431.16.peg.2065	2320431.10.peg.2064	2320431.17.peg.2066	2320431.13.peg.2068	2320431.14.peg.2063	2320431.12.peg.2063	2320431.15.peg.2067	65058.241.peg.2373
	30	65058.435.peg.15	65058.432.peg.35	2320431.4.peg.811	2320431.3.peg.2535	65058.401.peg.2296	65058.405.peg.2234	65058.406.peg.2112	65058.410.peg.2107	65058.411.peg.2071	65058.370.peg.2288	65058.373.peg.2288	65058.374.peg.1371	65058.375.peg.2402	65058.376.peg.802	65058.437.peg.2340	65058.385.peg.2293	65058.419.peg.1894	65058.361.peg.1834	65058.362.peg.2309	65058.363.peg.2578	65058.420.peg.1951	65058.421.peg.2480	65058.428.peg.1946	65058.426.peg.2136	65058.313.peg.1912	65058.314.peg.1690	65058.315.peg.2373	65058.316.peg.2157	2320456.3.peg.941	65058.317.peg.805	65058.318.peg.2220	65058.319.peg.2527	65058.320.peg.2361	65058.321.peg.2333	65058.322.peg.2442	65058.323.peg.2303	65058.229.peg.2376	2320431.9.peg.2060	2320431.16.peg.2062	2320431.10.peg.2061	2320431.17.peg.2063	2320431.13.peg.2065	2320431.14.peg.2060	2320431.12.peg.2060	2320431.15.peg.2064	65058.241.peg.2375
	31	65058.435.peg.16	65058.432.peg.34	2320431.4.peg.810	2320431.3.peg.2536	65058.401.peg.2295	65058.405.peg.2233	65058.406.peg.2113	65058.410.peg.2108	65058.411.peg.2072	65058.370.peg.2289	65058.373.peg.2289	65058.374.peg.1372	65058.375.peg.2401	65058.376.peg.801	65058.437.peg.2341	65058.385.peg.2294	65058.419.peg.1893	65058.361.peg.1835	65058.362.peg.2308	65058.363.peg.2577	65058.420.peg.1952	65058.421.peg.2481	65058.428.peg.1945	65058.426.peg.2135	65058.313.peg.1913	65058.314.peg.1689	65058.315.peg.2374	65058.316.peg.2158	2320456.3.peg.940	65058.317.peg.804	65058.318.peg.2219	65058.319.peg.2526	65058.320.peg.2360	65058.321.peg.2332	65058.322.peg.2441	65058.323.peg.2304	65058.229.peg.2375	2320431.9.peg.2059	2320431.16.peg.2061	2320431.10.peg.2060	2320431.17.peg.2062	2320431.13.peg.2064	2320431.14.peg.2059	2320431.12.peg.2059	2320431.15.peg.2063	65058.241.peg.2376
	32	65058.435.peg.17	65058.432.peg.33	2320431.4.peg.809	2320431.3.peg.2537	65058.401.peg.2294	65058.405.peg.2232	65058.406.peg.2114	65058.410.peg.2109	65058.411.peg.2073	65058.370.peg.2290	65058.373.peg.2290	65058.374.peg.1373	65058.375.peg.2400	65058.376.peg.800	65058.437.peg.2342	65058.385.peg.2295	65058.419.peg.1892	65058.361.peg.1836	65058.362.peg.2307	65058.363.peg.2576	65058.420.peg.1953	65058.421.peg.2482	65058.428.peg.1944	65058.426.peg.2134	65058.313.peg.1914	65058.314.peg.1688	65058.315.peg.2375	65058.316.peg.2159	2320456.3.peg.939	65058.317.peg.803	65058.318.peg.2218	65058.319.peg.2525	65058.320.peg.2359	65058.321.peg.2331	65058.322.peg.2440	65058.323.peg.2305	65058.229.peg.2374	2320431.9.peg.2058	2320431.16.peg.2060	2320431.10.peg.2059	2320431.17.peg.2061	2320431.13.peg.2063	2320431.14.peg.2058	2320431.12.peg.2058	2320431.15.peg.2062	65058.241.peg.2377
	33	65058.435.peg.18	65058.432.peg.32	2320431.4.peg.808	2320431.3.peg.2538	65058.401.peg.2293	65058.405.peg.2231	65058.406.peg.2115	65058.410.peg.2110	65058.411.peg.2074	65058.370.peg.2291	65058.373.peg.2291	65058.374.peg.1374	65058.375.peg.2399	65058.376.peg.799	65058.437.peg.2343	65058.385.peg.2296	65058.419.peg.1891	65058.361.peg.1837	65058.362.peg.2306	65058.363.peg.2575	65058.420.peg.1954	65058.421.peg.2483	65058.428.peg.1943	65058.426.peg.2133	65058.313.peg.1915	65058.314.peg.1687	65058.315.peg.2376	65058.316.peg.2160	2320456.3.peg.938	65058.317.peg.802	65058.318.peg.2217	65058.319.peg.2524	65058.320.peg.2358	65058.321.peg.2330	65058.322.peg.2439	65058.323.peg.2306	65058.229.peg.2373	2320431.9.peg.2057	2320431.16.peg.2059	2320431.10.peg.2058	2320431.17.peg.2060	2320431.13.peg.2062	2320431.14.peg.2057	2320431.12.peg.2057	2320431.15.peg.2061	65058.241.peg.2378
	34	65058.435.peg.19	65058.432.peg.31	2320431.4.peg.807	2320431.3.peg.2539	65058.401.peg.2292	65058.405.peg.2230	65058.406.peg.2116	65058.410.peg.2111	65058.411.peg.2075	65058.370.peg.2292	65058.373.peg.2292	65058.374.peg.1375	65058.375.peg.2398	65058.376.peg.798	65058.437.peg.2344	65058.385.peg.2297	65058.419.peg.1890	65058.361.peg.1838	65058.362.peg.2305	65058.363.peg.2574	65058.420.peg.1955	65058.421.peg.2484	65058.428.peg.1942	65058.426.peg.2132	65058.313.peg.1916	65058.314.peg.1686	65058.315.peg.2377	65058.316.peg.2161	2320456.3.peg.937	65058.317.peg.801	65058.318.peg.2216	65058.319.peg.2523	65058.320.peg.2357	65058.321.peg.2329	65058.322.peg.2438	65058.323.peg.2307	65058.229.peg.2372	2320431.9.peg.2056	2320431.16.peg.2058	2320431.10.peg.2057	2320431.17.peg.2059	2320431.13.peg.2061	2320431.14.peg.2056	2320431.12.peg.2056	2320431.15.peg.2060	65058.241.peg.2379
	35	65058.435.peg.20	65058.432.peg.30	2320431.4.peg.806	2320431.3.peg.2540	65058.401.peg.2291	65058.405.peg.2229	65058.406.peg.2117	65058.410.peg.2112	65058.411.peg.2076	65058.370.peg.2293	65058.373.peg.2293	65058.374.peg.1376	65058.375.peg.2397	65058.376.peg.797	65058.437.peg.2345	65058.385.peg.2298	65058.419.peg.1889	65058.361.peg.1839	65058.362.peg.2304	65058.363.peg.2573	65058.420.peg.1956	65058.421.peg.2485	65058.428.peg.1941	65058.426.peg.2131	65058.313.peg.1917	65058.314.peg.1685	65058.315.peg.2378	65058.316.peg.2162	2320456.3.peg.936	65058.317.peg.800	65058.318.peg.2215	65058.319.peg.2522	65058.320.peg.2356	65058.321.peg.2328	65058.322.peg.2437	65058.323.peg.2308	65058.229.peg.2371	2320431.9.peg.2055	2320431.16.peg.2057	2320431.10.peg.2056	2320431.17.peg.2058	2320431.13.peg.2060	2320431.14.peg.2055	2320431.12.peg.2055	2320431.15.peg.2059	65058.241.peg.2380
	36	65058.435.peg.21	65058.432.peg.29	2320431.4.peg.805	2320431.3.peg.2541	65058.401.peg.2290	65058.405.peg.2228	65058.406.peg.2118	65058.410.peg.2113	65058.411.peg.2077	65058.370.peg.2294	65058.373.peg.2294	65058.374.peg.1377	65058.375.peg.2396	65058.376.peg.796	65058.437.peg.2346	65058.385.peg.2299	65058.419.peg.1888	65058.361.peg.1840	65058.362.peg.2303	65058.363.peg.2572	65058.420.peg.1957	65058.421.peg.2486	65058.428.peg.1940	65058.426.peg.2130	65058.313.peg.1918	65058.314.peg.1684	65058.315.peg.2379	65058.316.peg.2163	2320456.3.peg.935	65058.317.peg.799	65058.318.peg.2214	65058.319.peg.2521	65058.320.peg.2355	65058.321.peg.2327	65058.322.peg.2436	65058.323.peg.2309	65058.229.peg.2370	2320431.9.peg.2054	2320431.16.peg.2056	2320431.10.peg.2055	2320431.17.peg.2057	2320431.13.peg.2059	2320431.14.peg.2054	2320431.12.peg.2054	2320431.15.peg.2058	65058.241.peg.2381
	37	65058.435.peg.22	65058.432.peg.28	2320431.4.peg.804	2320431.3.peg.2542	65058.401.peg.2289	65058.405.peg.2227	65058.406.peg.2119	65058.410.peg.2114	65058.411.peg.2078	65058.370.peg.2295	65058.373.peg.2295	65058.374.peg.1378	65058.375.peg.2395	65058.376.peg.795	65058.437.peg.2347	65058.385.peg.2300	65058.419.peg.1887	65058.361.peg.1841	65058.362.peg.2302	65058.363.peg.2571	65058.420.peg.1958	65058.421.peg.2487	65058.428.peg.1939	65058.426.peg.2129	65058.313.peg.1919	65058.314.peg.1683	65058.315.peg.2380	65058.316.peg.2164	2320456.3.peg.934	65058.317.peg.798	65058.318.peg.2213	65058.319.peg.2520	65058.320.peg.2354	65058.321.peg.2326	65058.322.peg.2435	65058.323.peg.2310	65058.229.peg.2369	2320431.9.peg.2053	2320431.16.peg.2055	2320431.10.peg.2054	2320431.17.peg.2056	2320431.13.peg.2058	2320431.14.peg.2053	2320431.12.peg.2053	2320431.15.peg.2057	65058.241.peg.2382
	38	65058.435.peg.23	65058.432.peg.27	2320431.4.peg.803	2320431.3.peg.2543	65058.401.peg.2288	65058.405.peg.2226	65058.406.peg.2120	65058.410.peg.2115	65058.411.peg.2079	65058.370.peg.2296	65058.373.peg.2296	65058.374.peg.1379	65058.375.peg.2394	65058.376.peg.794	65058.437.peg.2348	65058.385.peg.2301	65058.419.peg.1886	65058.361.peg.1842	65058.362.peg.2301	65058.363.peg.2570	65058.420.peg.1959	65058.421.peg.2488	65058.428.peg.1938	65058.426.peg.2128	65058.313.peg.1920	65058.314.peg.1682	65058.315.peg.2381	65058.316.peg.2165	2320456.3.peg.933	65058.317.peg.797	65058.318.peg.2212	65058.319.peg.2519	65058.320.peg.2353	65058.321.peg.2325	65058.322.peg.2434	65058.323.peg.2311	65058.229.peg.2368	2320431.9.peg.2052	2320431.16.peg.2054	2320431.10.peg.2053	2320431.17.peg.2055	2320431.13.peg.2057	2320431.14.peg.2052	2320431.12.peg.2052	2320431.15.peg.2056	65058.241.peg.2383
	39	65058.435.peg.24	65058.432.peg.26	2320431.4.peg.802	2320431.3.peg.2544	65058.401.peg.2287	65058.405.peg.2225	65058.406.peg.2121	65058.410.peg.2116	65058.411.peg.2080	65058.370.peg.2297	65058.373.peg.2297	65058.374.peg.1380	65058.375.peg.2393	65058.376.peg.793	65058.437.peg.2349	65058.385.peg.2302	65058.419.peg.1885	65058.361.peg.1843	65058.362.peg.2300	65058.363.peg.2569	65058.420.peg.1960	65058.421.peg.2489	65058.428.peg.1937	65058.426.peg.2127	65058.313.peg.1921	65058.314.peg.1681	65058.315.peg.2382	65058.316.peg.2166	2320456.3.peg.932	65058.317.peg.796	65058.318.peg.2211	65058.319.peg.2518	65058.320.peg.2352	65058.321.peg.2324	65058.322.peg.2433	65058.323.peg.2312	65058.229.peg.2367	2320431.9.peg.2051	2320431.16.peg.2053	2320431.10.peg.2052	2320431.17.peg.2054	2320431.13.peg.2056	2320431.14.peg.2051	2320431.12.peg.2051	2320431.15.peg.2055	65058.241.peg.2384
	40	65058.435.peg.25	65058.432.peg.25	2320431.4.peg.801	2320431.3.peg.2545	65058.401.peg.2286	65058.405.peg.2224	65058.406.peg.2122	65058.410.peg.2117	65058.411.peg.2081	65058.370.peg.2298	65058.373.peg.2298	65058.374.peg.1381	65058.375.peg.2392	65058.376.peg.792	65058.437.peg.2350	65058.385.peg.2303	65058.419.peg.1884	65058.361.peg.1844	65058.362.peg.2299	65058.363.peg.2568	65058.420.peg.1961	65058.421.peg.2490	65058.428.peg.1936	65058.426.peg.2126	65058.313.peg.1922	65058.314.peg.1680	65058.315.peg.2383	65058.316.peg.2167	2320456.3.peg.931	65058.317.peg.795	65058.318.peg.2210	65058.319.peg.2517	65058.320.peg.2351	65058.321.peg.2323	65058.322.peg.2432	65058.323.peg.2313	65058.229.peg.2366	2320431.9.peg.2050	2320431.16.peg.2052	2320431.10.peg.2051	2320431.17.peg.2053	2320431.13.peg.2055	2320431.14.peg.2050	2320431.12.peg.2050	2320431.15.peg.2054	65058.241.peg.2385
	41	65058.435.peg.26	65058.432.peg.24	2320431.4.peg.800	2320431.3.peg.2546	65058.401.peg.2285	65058.405.peg.2223	65058.406.peg.2123	65058.410.peg.2118	65058.411.peg.2082	65058.370.peg.2299	65058.373.peg.2299	65058.374.peg.1382	65058.375.peg.2391	65058.376.peg.791	65058.437.peg.2351	65058.385.peg.2304	65058.419.peg.1883	65058.361.peg.1845	65058.362.peg.2298	65058.363.peg.2567	65058.420.peg.1962	65058.421.peg.2491	65058.428.peg.1935	65058.426.peg.2125	65058.313.peg.1923	65058.314.peg.1679	65058.315.peg.2384	65058.316.peg.2168	2320456.3.peg.930	65058.317.peg.794	65058.318.peg.2209	65058.319.peg.2516	65058.320.peg.2350	65058.321.peg.2322	65058.322.peg.2431	65058.323.peg.2314	65058.229.peg.2365	2320431.9.peg.2049	2320431.16.peg.2051	2320431.10.peg.2050	2320431.17.peg.2052	2320431.13.peg.2054	2320431.14.peg.2049	2320431.12.peg.2049	2320431.15.peg.2053	65058.241.peg.2386
	42	65058.435.peg.27	65058.432.peg.23	2320431.4.peg.799	2320431.3.peg.2547	65058.401.peg.2284	65058.405.peg.2222	65058.406.peg.2124	65058.410.peg.2119	65058.411.peg.2083	65058.370.peg.2300	65058.373.peg.2300	65058.374.peg.1383	65058.375.peg.2390	65058.376.peg.790	65058.437.peg.2352	65058.385.peg.2305	65058.419.peg.1882	65058.361.peg.1846	65058.362.peg.2297	65058.363.peg.2566	65058.420.peg.1963	65058.421.peg.2492	65058.428.peg.1934	65058.426.peg.2124	65058.313.peg.1924	65058.314.peg.1678	65058.315.peg.2385	65058.316.peg.2169	2320456.3.peg.929	65058.317.peg.793	65058.318.peg.2208	65058.319.peg.2515	65058.320.peg.2349	65058.321.peg.2321	65058.322.peg.2430	65058.323.peg.2315	65058.229.peg.2364	2320431.9.peg.2048	2320431.16.peg.2050	2320431.10.peg.2049	2320431.17.peg.2051	2320431.13.peg.2053	2320431.14.peg.2048	2320431.12.peg.2048	2320431.15.peg.2052	65058.241.peg.2387
	43	65058.435.peg.28	65058.432.peg.22	2320431.4.peg.798	2320431.3.peg.2548	65058.401.peg.2283	65058.405.peg.2221	65058.406.peg.2125	65058.410.peg.2120	65058.411.peg.2084	65058.370.peg.2301	65058.373.peg.2301	65058.374.peg.1384	65058.375.peg.2389	65058.376.peg.789	65058.437.peg.2353	65058.385.peg.2306	65058.419.peg.1881	65058.361.peg.1847	65058.362.peg.2296	65058.363.peg.2565	65058.420.peg.1964	65058.421.peg.2493	65058.428.peg.1933	65058.426.peg.2123	65058.313.peg.1925	65058.314.peg.1677	65058.315.peg.2386	65058.316.peg.2170	2320456.3.peg.928	65058.317.peg.792	65058.318.peg.2207	65058.319.peg.2514	65058.320.peg.2348	65058.321.peg.2320	65058.322.peg.2429	65058.323.peg.2316	65058.229.peg.2363	2320431.9.peg.2047	2320431.16.peg.2049	2320431.10.peg.2048	2320431.17.peg.2050	2320431.13.peg.2052	2320431.14.peg.2047	2320431.12.peg.2047	2320431.15.peg.2051	65058.241.peg.2388
	44	65058.435.peg.29	65058.432.peg.21	2320431.4.peg.797	2320431.3.peg.2549	65058.401.peg.2282	65058.405.peg.2220	65058.406.peg.2126	65058.410.peg.2121	65058.411.peg.2085	65058.370.peg.2302	65058.373.peg.2302	65058.374.peg.1385	65058.375.peg.2388	65058.376.peg.788	65058.437.peg.2354	65058.385.peg.2307	65058.419.peg.1880	65058.361.peg.1848	65058.362.peg.2295	65058.363.peg.2564	65058.420.peg.1965	65058.421.peg.2494	65058.428.peg.1932	65058.426.peg.2122	65058.313.peg.1926	65058.314.peg.1676	65058.315.peg.2387	65058.316.peg.2171	2320456.3.peg.927	65058.317.peg.791	65058.318.peg.2206	65058.319.peg.2513	65058.320.peg.2347	65058.321.peg.2319	65058.322.peg.2428	65058.323.peg.2317	65058.229.peg.2362	2320431.9.peg.2046	2320431.16.peg.2048	2320431.10.peg.2047	2320431.17.peg.2049	2320431.13.peg.2051	2320431.14.peg.2046	2320431.12.peg.2046	2320431.15.peg.2050	65058.241.peg.2389
	45	65058.435.peg.30	65058.432.peg.20	2320431.4.peg.795	2320431.3.peg.2551	65058.401.peg.2280	65058.405.peg.2219	65058.406.peg.2128	65058.410.peg.2123	65058.411.peg.2087	65058.370.peg.2303	65058.373.peg.2303	65058.374.peg.1386	65058.375.peg.2387	65058.376.peg.787	65058.437.peg.2356	65058.385.peg.2309	65058.419.peg.1879	65058.361.peg.1850	65058.362.peg.2294	65058.363.peg.2562	65058.420.peg.1966	65058.421.peg.2496	65058.428.peg.1930	65058.426.peg.2121	65058.313.peg.1927	65058.314.peg.1675	65058.315.peg.2388	65058.316.peg.2172	2320456.3.peg.926	65058.317.peg.789	65058.318.peg.2204	65058.319.peg.2512	65058.320.peg.2346	65058.321.peg.2318	65058.322.peg.2426	65058.323.peg.2318	65058.229.peg.2361	2320431.9.peg.2044	2320431.16.peg.2046	2320431.10.peg.2046	2320431.17.peg.2048	2320431.13.peg.2049	2320431.14.peg.2045	2320431.12.peg.2045	2320431.15.peg.2048	65058.241.peg.2391
	46	65058.435.peg.31	65058.432.peg.19	2320431.4.peg.794	2320431.3.peg.2552	65058.401.peg.2279	65058.405.peg.2218	65058.406.peg.2129	65058.410.peg.2124	65058.411.peg.2088	65058.370.peg.2304	65058.373.peg.2304	65058.374.peg.1387	65058.375.peg.2386	65058.376.peg.786	65058.437.peg.2357	65058.385.peg.2310	65058.419.peg.1878	65058.361.peg.1851	65058.362.peg.2293	65058.363.peg.2561	65058.420.peg.1967	65058.421.peg.2497	65058.428.peg.1929	65058.426.peg.2120	65058.313.peg.1928	65058.314.peg.1674	65058.315.peg.2389	65058.316.peg.2173	2320456.3.peg.925	65058.317.peg.788	65058.318.peg.2203	65058.319.peg.2511	65058.320.peg.2345	65058.321.peg.2317	65058.322.peg.2425	65058.323.peg.2319	65058.229.peg.2360	2320431.9.peg.2043	2320431.16.peg.2045	2320431.10.peg.2045	2320431.17.peg.2047	2320431.13.peg.2048	2320431.14.peg.2044	2320431.12.peg.2044	2320431.15.peg.2047	65058.241.peg.2392
	47	65058.435.peg.32	65058.432.peg.18	2320431.4.peg.793	2320431.3.peg.2553	65058.401.peg.2278	65058.405.peg.2217	65058.406.peg.2130	65058.410.peg.2125	65058.411.peg.2089	65058.370.peg.2305	65058.373.peg.2305	65058.374.peg.1388	65058.375.peg.2385	65058.376.peg.785	65058.437.peg.2358	65058.385.peg.2311	65058.419.peg.1877	65058.361.peg.1852	65058.362.peg.2292	65058.363.peg.2560	65058.420.peg.1968	65058.421.peg.2498	65058.428.peg.1928	65058.426.peg.2119	65058.313.peg.1929	65058.314.peg.1673	65058.315.peg.2390	65058.316.peg.2174	2320456.3.peg.924	65058.317.peg.787	65058.318.peg.2202	65058.319.peg.2510	65058.320.peg.2344	65058.321.peg.2316	65058.322.peg.2424	65058.323.peg.2320	65058.229.peg.2359	2320431.9.peg.2042	2320431.16.peg.2044	2320431.10.peg.2044	2320431.17.peg.2046	2320431.13.peg.2047	2320431.14.peg.2043	2320431.12.peg.2043	2320431.15.peg.2046	65058.241.peg.2393
	48	65058.435.peg.33	65058.432.peg.17	2320431.4.peg.792	2320431.3.peg.2554	65058.401.peg.2277	65058.405.peg.2216	65058.406.peg.2131	65058.410.peg.2126	65058.411.peg.2090	65058.370.peg.2306	65058.373.peg.2306	65058.374.peg.1389	65058.375.peg.2384	65058.376.peg.784	65058.437.peg.2359	65058.385.peg.2312	65058.419.peg.1876	65058.361.peg.1853	65058.362.peg.2291	65058.363.peg.2559	65058.420.peg.1969	65058.421.peg.2499	65058.428.peg.1927	65058.426.peg.2118	65058.313.peg.1930	65058.314.peg.1672	65058.315.peg.2391	65058.316.peg.2175	2320456.3.peg.923	65058.317.peg.786	65058.318.peg.2201	65058.319.peg.2509	65058.320.peg.2343	65058.321.peg.2315	65058.322.peg.2423	65058.323.peg.2321	65058.229.peg.2358	2320431.9.peg.2041	2320431.16.peg.2043	2320431.10.peg.2043	2320431.17.peg.2045	2320431.13.peg.2046	2320431.14.peg.2042	2320431.12.peg.2042	2320431.15.peg.2045	65058.241.peg.2394
	49	65058.435.peg.34	65058.432.peg.16	2320431.4.peg.791	2320431.3.peg.2555	65058.401.peg.2276	65058.405.peg.2215	65058.406.peg.2132	65058.410.peg.2127	65058.411.peg.2091	65058.370.peg.2307	65058.373.peg.2307	65058.374.peg.1390	65058.375.peg.2383	65058.376.peg.783	65058.437.peg.2360	65058.385.peg.2313	65058.419.peg.1875	65058.361.peg.1854	65058.362.peg.2290	65058.363.peg.2558	65058.420.peg.1970	65058.421.peg.2500	65058.428.peg.1926	65058.426.peg.2117	65058.313.peg.1931	65058.314.peg.1671	65058.315.peg.2392	65058.316.peg.2176	2320456.3.peg.922	65058.317.peg.785	65058.318.peg.2200	65058.319.peg.2508	65058.320.peg.2342	65058.321.peg.2314	65058.322.peg.2422	65058.323.peg.2322	65058.229.peg.2357	2320431.9.peg.2040	2320431.16.peg.2042	2320431.10.peg.2042	2320431.17.peg.2044	2320431.13.peg.2045	2320431.14.peg.2041	2320431.12.peg.2041	2320431.15.peg.2044	65058.241.peg.2395
	50	65058.435.peg.35	65058.432.peg.15	2320431.4.peg.790	2320431.3.peg.2556	65058.401.peg.2275	65058.405.peg.2214	65058.406.peg.2133	65058.410.peg.2128	65058.411.peg.2092	65058.370.peg.2308	65058.373.peg.2308	65058.374.peg.1391	65058.375.peg.2382	65058.376.peg.782	65058.437.peg.2361	65058.385.peg.2314	65058.419.peg.1874	65058.361.peg.1855	65058.362.peg.2289	65058.363.peg.2557	65058.420.peg.1971	65058.421.peg.2501	65058.428.peg.1925	65058.426.peg.2116	65058.313.peg.1932	65058.314.peg.1670	65058.315.peg.2393	65058.316.peg.2177	2320456.3.peg.921	65058.317.peg.784	65058.318.peg.2199	65058.319.peg.2507	65058.320.peg.2341	65058.321.peg.2313	65058.322.peg.2421	65058.323.peg.2323	65058.229.peg.2356	2320431.9.peg.2039	2320431.16.peg.2041	2320431.10.peg.2041	2320431.17.peg.2043	2320431.13.peg.2044	2320431.14.peg.2040	2320431.12.peg.2040	2320431.15.peg.2043	65058.241.peg.2396
	51	65058.435.peg.36	65058.432.peg.14	2320431.4.peg.789	2320431.3.peg.2557	65058.401.peg.2274	65058.405.peg.2213	65058.406.peg.2134	65058.410.peg.2129	65058.411.peg.2093	65058.370.peg.2309	65058.373.peg.2309	65058.374.peg.1392	65058.375.peg.2381	65058.376.peg.781	65058.437.peg.2362	65058.385.peg.2315	65058.419.peg.1873	65058.361.peg.1856	65058.362.peg.2288	65058.363.peg.2556	65058.420.peg.1972	65058.421.peg.2502	65058.428.peg.1924	65058.426.peg.2115	65058.313.peg.1933	65058.314.peg.1669	65058.315.peg.2394	65058.316.peg.2178	2320456.3.peg.920	65058.317.peg.783	65058.318.peg.2198	65058.319.peg.2506	65058.320.peg.2340	65058.321.peg.2312	65058.322.peg.2420	65058.323.peg.2324	65058.229.peg.2355	2320431.9.peg.2038	2320431.16.peg.2040	2320431.10.peg.2040	2320431.17.peg.2042	2320431.13.peg.2043	2320431.14.peg.2039	2320431.12.peg.2039	2320431.15.peg.2042	65058.241.peg.2397
	52	65058.435.peg.37	65058.432.peg.13	2320431.4.peg.788	2320431.3.peg.2558	65058.401.peg.2273	65058.405.peg.2212	65058.406.peg.2135	65058.410.peg.2130	65058.411.peg.2094	65058.370.peg.2310	65058.373.peg.2310	65058.374.peg.1393	65058.375.peg.2380	65058.376.peg.780	65058.437.peg.2363	65058.385.peg.2316	65058.419.peg.1872	65058.361.peg.1857	65058.362.peg.2287	65058.363.peg.2555	65058.420.peg.1973	65058.421.peg.2503	65058.428.peg.1923	65058.426.peg.2114	65058.313.peg.1934	65058.314.peg.1668	65058.315.peg.2395	65058.316.peg.2179	2320456.3.peg.919	65058.317.peg.782	65058.318.peg.2197	65058.319.peg.2505	65058.320.peg.2339	65058.321.peg.2311	65058.322.peg.2419	65058.323.peg.2325	65058.229.peg.2354	2320431.9.peg.2037	2320431.16.peg.2039	2320431.10.peg.2039	2320431.17.peg.2041	2320431.13.peg.2042	2320431.14.peg.2038	2320431.12.peg.2038	2320431.15.peg.2041	65058.241.peg.2398
	53	65058.435.peg.39	65058.432.peg.11	2320431.4.peg.786	2320431.3.peg.2560	65058.401.peg.2271	65058.405.peg.2210	65058.406.peg.2137	65058.410.peg.2132	65058.411.peg.2096	65058.370.peg.2312	65058.373.peg.2312	65058.374.peg.1395	65058.375.peg.2378	65058.376.peg.778	65058.437.peg.2365	65058.385.peg.2318	65058.419.peg.1870	65058.361.peg.1859	65058.362.peg.2285	65058.363.peg.2553	65058.420.peg.1975	65058.421.peg.2505	65058.428.peg.1921	65058.426.peg.2112	65058.313.peg.1936	65058.314.peg.1666	65058.315.peg.2397	65058.316.peg.2181	2320456.3.peg.917	65058.317.peg.780	65058.318.peg.2195	65058.319.peg.2503	65058.320.peg.2337	65058.321.peg.2309	65058.322.peg.2417	65058.323.peg.2327	65058.229.peg.2352	2320431.9.peg.2035	2320431.16.peg.2037	2320431.10.peg.2037	2320431.17.peg.2039	2320431.13.peg.2040	2320431.14.peg.2036	2320431.12.peg.2036	2320431.15.peg.2039	65058.241.peg.2400
	54	65058.435.peg.40	65058.432.peg.10	2320431.4.peg.785	2320431.3.peg.2561	65058.401.peg.2270	65058.405.peg.2209	65058.406.peg.2138	65058.410.peg.2133	65058.411.peg.2097	65058.370.peg.2313	65058.373.peg.2313	65058.374.peg.1396	65058.375.peg.2377	65058.376.peg.777	65058.437.peg.2366	65058.385.peg.2319	65058.419.peg.1869	65058.361.peg.1860	65058.362.peg.2284	65058.363.peg.2552	65058.420.peg.1976	65058.421.peg.2506	65058.428.peg.1920	65058.426.peg.2111	65058.313.peg.1937	65058.314.peg.1665	65058.315.peg.2398	65058.316.peg.2182	2320456.3.peg.916	65058.317.peg.779	65058.318.peg.2194	65058.319.peg.2502	65058.320.peg.2336	65058.321.peg.2308	65058.322.peg.2416	65058.323.peg.2328	65058.229.peg.2351	2320431.9.peg.2034	2320431.16.peg.2036	2320431.10.peg.2036	2320431.17.peg.2038	2320431.13.peg.2039	2320431.14.peg.2035	2320431.12.peg.2035	2320431.15.peg.2038	65058.241.peg.2401
	55	65058.435.peg.41	65058.432.peg.9	2320431.4.peg.784	2320431.3.peg.2562	65058.401.peg.2269	65058.405.peg.2208	65058.406.peg.2139	65058.410.peg.2134	65058.411.peg.2098	65058.370.peg.2314	65058.373.peg.2314	65058.374.peg.1398	65058.375.peg.2376	65058.376.peg.776	65058.437.peg.2367	65058.385.peg.2320	65058.419.peg.1868	65058.361.peg.1863	65058.362.peg.2283	65058.363.peg.2551	65058.420.peg.1977	65058.421.peg.2507	65058.428.peg.1919	65058.426.peg.2110	65058.313.peg.1938	65058.314.peg.2593	65058.315.peg.2399	65058.316.peg.2183	2320456.3.peg.2663	65058.317.peg.778	65058.318.peg.2193	65058.319.peg.2501	65058.320.peg.2588	65058.321.peg.2307	65058.322.peg.2115	65058.323.peg.1695	65058.229.peg.2350	2320431.9.peg.2033	2320431.16.peg.2035	2320431.10.peg.2035	2320431.17.peg.2035	2320431.13.peg.2036	2320431.14.peg.2034	2320431.12.peg.2034	2320431.15.peg.2037	65058.241.peg.2402
	56	65058.435.peg.42	65058.432.peg.8	2320431.4.peg.783	2320431.3.peg.2563	65058.401.peg.2267	65058.405.peg.2207	65058.406.peg.2140	65058.410.peg.2135	65058.411.peg.2099	65058.370.peg.2315	65058.373.peg.2315	65058.374.peg.1399	65058.375.peg.2375	65058.376.peg.775	65058.437.peg.2368	65058.385.peg.2321	65058.419.peg.1867	65058.361.peg.1864	65058.362.peg.2282	65058.363.peg.2550	65058.420.peg.1978	65058.421.peg.2508	65058.428.peg.1918	65058.426.peg.2109	65058.313.peg.1939	65058.314.peg.2594	65058.315.peg.2400	65058.316.peg.2184	2320456.3.peg.2662	65058.317.peg.777	65058.318.peg.2192	65058.319.peg.2500	65058.320.peg.2587	65058.321.peg.2306	65058.322.peg.2116	65058.323.peg.1694	65058.229.peg.2349	2320431.9.peg.2032	2320431.16.peg.2034	2320431.10.peg.2034	2320431.17.peg.2034	2320431.13.peg.2035	2320431.14.peg.2033	2320431.12.peg.2033	2320431.15.peg.2036	65058.241.peg.2403
	57	65058.435.peg.43	65058.432.peg.7	2320431.4.peg.782	2320431.3.peg.2564	65058.401.peg.2266	65058.405.peg.2206	65058.406.peg.2141	65058.410.peg.2136	65058.411.peg.2100	65058.370.peg.2316	65058.373.peg.2316	65058.374.peg.1400	65058.375.peg.2374	65058.376.peg.774	65058.437.peg.2369	65058.385.peg.2322	65058.419.peg.1866	65058.361.peg.1865	65058.362.peg.2281	65058.363.peg.2549	65058.420.peg.1979	65058.421.peg.2509	65058.428.peg.1917	65058.426.peg.2108	65058.313.peg.1940	65058.314.peg.2595	65058.315.peg.2401	65058.316.peg.2185	2320456.3.peg.2661	65058.317.peg.776	65058.318.peg.2191	65058.319.peg.2499	65058.320.peg.2586	65058.321.peg.2305	65058.322.peg.2117	65058.323.peg.1693	65058.229.peg.2348	2320431.9.peg.2031	2320431.16.peg.2033	2320431.10.peg.2033	2320431.17.peg.2033	2320431.13.peg.2034	2320431.14.peg.2032	2320431.12.peg.2032	2320431.15.peg.2035	65058.241.peg.2404
	58	65058.435.peg.44	65058.432.peg.6	2320431.4.peg.781	2320431.3.peg.2565	65058.401.peg.2265	65058.405.peg.2205	65058.406.peg.2142	65058.410.peg.2137	65058.411.peg.2101	65058.370.peg.2317	65058.373.peg.2317	65058.374.peg.1401	65058.375.peg.2373	65058.376.peg.773	65058.437.peg.2370	65058.385.peg.2323	65058.419.peg.1865	65058.361.peg.1866	65058.362.peg.2280	65058.363.peg.2548	65058.420.peg.1980	65058.421.peg.2510	65058.428.peg.1916	65058.426.peg.2107	65058.313.peg.1941	65058.314.peg.2596	65058.315.peg.2402	65058.316.peg.2186	2320456.3.peg.2660	65058.317.peg.775	65058.318.peg.2190	65058.319.peg.2498	65058.320.peg.2585	65058.321.peg.2304	65058.322.peg.2118	65058.323.peg.1692	65058.229.peg.2347	2320431.9.peg.2030	2320431.16.peg.2032	2320431.10.peg.2032	2320431.17.peg.2032	2320431.13.peg.2033	2320431.14.peg.2031	2320431.12.peg.2031	2320431.15.peg.2034	65058.241.peg.2405
	59	65058.435.peg.45	65058.432.peg.5	2320431.4.peg.780	2320431.3.peg.2566	65058.401.peg.2264	65058.405.peg.2204	65058.406.peg.2143	65058.410.peg.2138	65058.411.peg.2102	65058.370.peg.2318	65058.373.peg.2318	65058.374.peg.1402	65058.375.peg.2372	65058.376.peg.772	65058.437.peg.2371	65058.385.peg.2324	65058.419.peg.1864	65058.361.peg.1867	65058.362.peg.2279	65058.363.peg.2547	65058.420.peg.1981	65058.421.peg.2511	65058.428.peg.1915	65058.426.peg.2106	65058.313.peg.1942	65058.314.peg.2597	65058.315.peg.2403	65058.316.peg.2187	2320456.3.peg.2659	65058.317.peg.774	65058.318.peg.2189	65058.319.peg.2497	65058.320.peg.2584	65058.321.peg.2303	65058.322.peg.2119	65058.323.peg.1691	65058.229.peg.2346	2320431.9.peg.2029	2320431.16.peg.2031	2320431.10.peg.2031	2320431.17.peg.2031	2320431.13.peg.2032	2320431.14.peg.2030	2320431.12.peg.2030	2320431.15.peg.2033	65058.241.peg.2406
	60	65058.435.peg.46	65058.432.peg.4	2320431.4.peg.779	2320431.3.peg.2567	65058.401.peg.2263	65058.405.peg.2203	65058.406.peg.2144	65058.410.peg.2139	65058.411.peg.2103	65058.370.peg.2319	65058.373.peg.2319	65058.374.peg.1403	65058.375.peg.2371	65058.376.peg.771	65058.437.peg.2372	65058.385.peg.2325	65058.419.peg.1863	65058.361.peg.1868	65058.362.peg.2278	65058.363.peg.2546	65058.420.peg.1982	65058.421.peg.2512	65058.428.peg.1914	65058.426.peg.2105	65058.313.peg.1943	65058.314.peg.2598	65058.315.peg.2404	65058.316.peg.2188	2320456.3.peg.2658	65058.317.peg.773	65058.318.peg.2188	65058.319.peg.2496	65058.320.peg.2583	65058.321.peg.2302	65058.322.peg.2120	65058.323.peg.1690	65058.229.peg.2345	2320431.9.peg.2028	2320431.16.peg.2030	2320431.10.peg.2030	2320431.17.peg.2030	2320431.13.peg.2031	2320431.14.peg.2029	2320431.12.peg.2029	2320431.15.peg.2032	65058.241.peg.2407
	61	65058.435.peg.48	65058.432.peg.2	2320431.4.peg.777	2320431.3.peg.2569	65058.401.peg.2261	65058.405.peg.2201	65058.406.peg.2146	65058.410.peg.2141	65058.411.peg.2105	65058.370.peg.2321	65058.373.peg.2321	65058.374.peg.1405	65058.375.peg.2369	65058.376.peg.769	65058.437.peg.2374	65058.385.peg.2327	65058.419.peg.1861	65058.361.peg.1871	65058.362.peg.2276	65058.363.peg.2544	65058.420.peg.1985	65058.421.peg.2514	65058.428.peg.1912	65058.426.peg.2103	65058.313.peg.1946	65058.314.peg.2600	65058.315.peg.2406	65058.316.peg.2190	2320456.3.peg.2656	65058.317.peg.771	65058.318.peg.2186	65058.319.peg.2494	65058.320.peg.2581	65058.321.peg.2300	65058.322.peg.2122	65058.323.peg.1687	65058.229.peg.2343	2320431.9.peg.2026	2320431.16.peg.2028	2320431.10.peg.2028	2320431.17.peg.2028	2320431.13.peg.2029	2320431.14.peg.2026	2320431.12.peg.2027	2320431.15.peg.2030	65058.241.peg.2409
	62	65058.435.peg.49	65058.432.peg.2568	2320431.4.peg.776	2320431.3.peg.2570	65058.401.peg.2260	65058.405.peg.2200	65058.406.peg.2147	65058.410.peg.2142	65058.411.peg.2106	65058.370.peg.1835	65058.373.peg.1835	65058.374.peg.1406	65058.375.peg.2368	65058.376.peg.768	65058.437.peg.1829	65058.385.peg.1922	65058.419.peg.1860	65058.361.peg.1872	65058.362.peg.2275	65058.363.peg.2209	65058.420.peg.1986	65058.421.peg.2171	65058.428.peg.1911	65058.426.peg.2102	65058.313.peg.1947	65058.314.peg.1872	65058.315.peg.2407	65058.316.peg.2191	2320456.3.peg.2655	65058.317.peg.770	65058.318.peg.2185	65058.319.peg.2168	65058.320.peg.1722	65058.321.peg.1753	65058.322.peg.2123	65058.323.peg.1686	65058.229.peg.2342	2320431.9.peg.2025	2320431.16.peg.2027	2320431.10.peg.2027	2320431.17.peg.2027	2320431.13.peg.2028	2320431.14.peg.2025	2320431.12.peg.2026	2320431.15.peg.2029	65058.241.peg.2410
	63	65058.435.peg.50	65058.432.peg.2567	2320431.4.peg.775	2320431.3.peg.2571	65058.401.peg.2259	65058.405.peg.2199	65058.406.peg.2148	65058.410.peg.2143	65058.411.peg.2107	65058.370.peg.1834	65058.373.peg.1834	65058.374.peg.1407	65058.375.peg.2367	65058.376.peg.767	65058.437.peg.1830	65058.385.peg.1923	65058.419.peg.1859	65058.361.peg.1873	65058.362.peg.2274	65058.363.peg.2208	65058.420.peg.1987	65058.421.peg.2172	65058.428.peg.1910	65058.426.peg.2101	65058.313.peg.1948	65058.314.peg.1873	65058.315.peg.2408	65058.316.peg.2192	2320456.3.peg.2654	65058.317.peg.769	65058.318.peg.2184	65058.319.peg.2167	65058.320.peg.1723	65058.321.peg.1752	65058.322.peg.2124	65058.323.peg.1685	65058.229.peg.2341	2320431.9.peg.2024	2320431.16.peg.2026	2320431.10.peg.2026	2320431.17.peg.2026	2320431.13.peg.2027	2320431.14.peg.2024	2320431.12.peg.2025	2320431.15.peg.2028	65058.241.peg.2411
	64	65058.435.peg.52	65058.432.peg.2565	2320431.4.peg.773	2320431.3.peg.2573	65058.401.peg.2258	65058.405.peg.2198	65058.406.peg.2150	65058.410.peg.2145	65058.411.peg.2109	65058.370.peg.1833	65058.373.peg.1833	65058.374.peg.1409	65058.375.peg.2365	65058.376.peg.766	65058.437.peg.1831	65058.385.peg.1924	65058.419.peg.1858	65058.361.peg.1875	65058.362.peg.2273	65058.363.peg.2206	65058.420.peg.1988	65058.421.peg.2173	65058.428.peg.1909	65058.426.peg.2100	65058.313.peg.1950	65058.314.peg.1874	65058.315.peg.2409	65058.316.peg.2193	2320456.3.peg.2652	65058.317.peg.768	65058.318.peg.2182	65058.319.peg.2166	65058.320.peg.1724	65058.321.peg.1751	65058.322.peg.2125	65058.323.peg.1683	65058.229.peg.2339	2320431.9.peg.2022	2320431.16.peg.2024	2320431.10.peg.2024	2320431.17.peg.2024	2320431.13.peg.2025	2320431.14.peg.2022	2320431.12.peg.2023	2320431.15.peg.2026	65058.241.peg.2413
	65	65058.435.peg.53	65058.432.peg.2564	2320431.4.peg.772	2320431.3.peg.2574	65058.401.peg.2257	65058.405.peg.2197	65058.406.peg.2151	65058.410.peg.2146	65058.411.peg.2110	65058.370.peg.1832	65058.373.peg.1832	65058.374.peg.1410	65058.375.peg.2364	65058.376.peg.765	65058.437.peg.1832	65058.385.peg.1925	65058.419.peg.1857	65058.361.peg.1876	65058.362.peg.2272	65058.363.peg.2205	65058.420.peg.1989	65058.421.peg.2174	65058.428.peg.1908	65058.426.peg.2099	65058.313.peg.1951	65058.314.peg.1875	65058.315.peg.2410	65058.316.peg.2194	2320456.3.peg.2651	65058.317.peg.767	65058.318.peg.2181	65058.319.peg.2165	65058.320.peg.1725	65058.321.peg.1750	65058.322.peg.2126	65058.323.peg.1682	65058.229.peg.2338	2320431.9.peg.2021	2320431.16.peg.2023	2320431.10.peg.2023	2320431.17.peg.2023	2320431.13.peg.2024	2320431.14.peg.2021	2320431.12.peg.2022	2320431.15.peg.2025	65058.241.peg.2414
	66	65058.435.peg.54	65058.432.peg.2563	2320431.4.peg.771	2320431.3.peg.2575	65058.401.peg.2256	65058.405.peg.2196	65058.406.peg.2152	65058.410.peg.2147	65058.411.peg.2111	65058.370.peg.1831	65058.373.peg.1831	65058.374.peg.1411	65058.375.peg.2363	65058.376.peg.764	65058.437.peg.1833	65058.385.peg.1926	65058.419.peg.1856	65058.361.peg.1877	65058.362.peg.2271	65058.363.peg.2204	65058.420.peg.1990	65058.421.peg.2175	65058.428.peg.1907	65058.426.peg.2098	65058.313.peg.1952	65058.314.peg.1876	65058.315.peg.2411	65058.316.peg.2195	2320456.3.peg.2650	65058.317.peg.766	65058.318.peg.2180	65058.319.peg.2164	65058.320.peg.1726	65058.321.peg.1749	65058.322.peg.2127	65058.323.peg.1681	65058.229.peg.2337	2320431.9.peg.2020	2320431.16.peg.2022	2320431.10.peg.2022	2320431.17.peg.2022	2320431.13.peg.2023	2320431.14.peg.2020	2320431.12.peg.2021	2320431.15.peg.2024	65058.241.peg.2415
	67	65058.435.peg.55	65058.432.peg.2562	2320431.4.peg.770	2320431.3.peg.2576	65058.401.peg.2255	65058.405.peg.2195	65058.406.peg.2153	65058.410.peg.2148	65058.411.peg.2112	65058.370.peg.1830	65058.373.peg.1830	65058.374.peg.1412	65058.375.peg.2362	65058.376.peg.763	65058.437.peg.1834	65058.385.peg.1927	65058.419.peg.1855	65058.361.peg.1878	65058.362.peg.2270	65058.363.peg.2203	65058.420.peg.1991	65058.421.peg.2176	65058.428.peg.1906	65058.426.peg.2097	65058.313.peg.1953	65058.314.peg.1877	65058.315.peg.2412	65058.316.peg.2196	2320456.3.peg.2649	65058.317.peg.765	65058.318.peg.2179	65058.319.peg.2163	65058.320.peg.1727	65058.321.peg.1748	65058.322.peg.2128	65058.323.peg.1680	65058.229.peg.2336	2320431.9.peg.2019	2320431.16.peg.2021	2320431.10.peg.2021	2320431.17.peg.2021	2320431.13.peg.2022	2320431.14.peg.2019	2320431.12.peg.2020	2320431.15.peg.2023	65058.241.peg.2416
	68	65058.435.peg.56	65058.432.peg.2561	2320431.4.peg.769	2320431.3.peg.2577	65058.401.peg.2254	65058.405.peg.2194	65058.406.peg.2154	65058.410.peg.2149	65058.411.peg.2113	65058.370.peg.1829	65058.373.peg.1829	65058.374.peg.1413	65058.375.peg.2361	65058.376.peg.762	65058.437.peg.1835	65058.385.peg.1928	65058.419.peg.1854	65058.361.peg.1879	65058.362.peg.2269	65058.363.peg.2202	65058.420.peg.1992	65058.421.peg.2177	65058.428.peg.1905	65058.426.peg.2096	65058.313.peg.1954	65058.314.peg.1878	65058.315.peg.2413	65058.316.peg.2197	2320456.3.peg.2648	65058.317.peg.764	65058.318.peg.2178	65058.319.peg.2162	65058.320.peg.1728	65058.321.peg.1747	65058.322.peg.2129	65058.323.peg.1679	65058.229.peg.2335	2320431.9.peg.2018	2320431.16.peg.2020	2320431.10.peg.2020	2320431.17.peg.2020	2320431.13.peg.2021	2320431.14.peg.2018	2320431.12.peg.2019	2320431.15.peg.2022	65058.241.peg.2417
	69	65058.435.peg.57	65058.432.peg.2560	2320431.4.peg.768	2320431.3.peg.2578	65058.401.peg.2253	65058.405.peg.2193	65058.406.peg.2155	65058.410.peg.2150	65058.411.peg.2114	65058.370.peg.1828	65058.373.peg.1828	65058.374.peg.1414	65058.375.peg.2360	65058.376.peg.761	65058.437.peg.1836	65058.385.peg.1929	65058.419.peg.1853	65058.361.peg.1880	65058.362.peg.2268	65058.363.peg.2201	65058.420.peg.1993	65058.421.peg.2178	65058.428.peg.1904	65058.426.peg.2095	65058.313.peg.1955	65058.314.peg.1879	65058.315.peg.2414	65058.316.peg.2198	2320456.3.peg.2647	65058.317.peg.763	65058.318.peg.2177	65058.319.peg.2161	65058.320.peg.1729	65058.321.peg.1746	65058.322.peg.2130	65058.323.peg.1678	65058.229.peg.2334	2320431.9.peg.2017	2320431.16.peg.2019	2320431.10.peg.2019	2320431.17.peg.2019	2320431.13.peg.2020	2320431.14.peg.2017	2320431.12.peg.2018	2320431.15.peg.2021	65058.241.peg.2418
	70	65058.435.peg.58	65058.432.peg.2559	2320431.4.peg.767	2320431.3.peg.2579	65058.401.peg.2252	65058.405.peg.2192	65058.406.peg.2156	65058.410.peg.2151	65058.411.peg.2115	65058.370.peg.1827	65058.373.peg.1827	65058.374.peg.1415	65058.375.peg.2359	65058.376.peg.760	65058.437.peg.1837	65058.385.peg.1930	65058.419.peg.1852	65058.361.peg.1881	65058.362.peg.2267	65058.363.peg.2200	65058.420.peg.1994	65058.421.peg.2179	65058.428.peg.1903	65058.426.peg.2094	65058.313.peg.1956	65058.314.peg.1880	65058.315.peg.2415	65058.316.peg.2199	2320456.3.peg.2646	65058.317.peg.762	65058.318.peg.2176	65058.319.peg.2160	65058.320.peg.1730	65058.321.peg.1745	65058.322.peg.2131	65058.323.peg.1677	65058.229.peg.2333	2320431.9.peg.2016	2320431.16.peg.2018	2320431.10.peg.2018	2320431.17.peg.2018	2320431.13.peg.2019	2320431.14.peg.2016	2320431.12.peg.2017	2320431.15.peg.2020	65058.241.peg.2419
	71	65058.435.peg.59	65058.432.peg.2558	2320431.4.peg.766	2320431.3.peg.2580	65058.401.peg.2251	65058.405.peg.2191	65058.406.peg.2157	65058.410.peg.2152	65058.411.peg.2116	65058.370.peg.1826	65058.373.peg.1826	65058.374.peg.1416	65058.375.peg.2358	65058.376.peg.759	65058.437.peg.1838	65058.385.peg.1931	65058.419.peg.1851	65058.361.peg.1882	65058.362.peg.2266	65058.363.peg.2199	65058.420.peg.1995	65058.421.peg.2180	65058.428.peg.1902	65058.426.peg.2093	65058.313.peg.1957	65058.314.peg.1881	65058.315.peg.2416	65058.316.peg.2200	2320456.3.peg.2645	65058.317.peg.761	65058.318.peg.2175	65058.319.peg.2159	65058.320.peg.1731	65058.321.peg.1744	65058.322.peg.2132	65058.323.peg.1676	65058.229.peg.2332	2320431.9.peg.2015	2320431.16.peg.2017	2320431.10.peg.2017	2320431.17.peg.2017	2320431.13.peg.2018	2320431.14.peg.2015	2320431.12.peg.2016	2320431.15.peg.2019	65058.241.peg.2420
	72	65058.435.peg.60	65058.432.peg.2557	2320431.4.peg.765	2320431.3.peg.2581	65058.401.peg.2250	65058.405.peg.2190	65058.406.peg.2158	65058.410.peg.2153	65058.411.peg.2117	65058.370.peg.1825	65058.373.peg.1825	65058.374.peg.1417	65058.375.peg.2357	65058.376.peg.758	65058.437.peg.1839	65058.385.peg.1932	65058.419.peg.1850	65058.361.peg.1883	65058.362.peg.2265	65058.363.peg.2198	65058.420.peg.1996	65058.421.peg.2181	65058.428.peg.1901	65058.426.peg.2092	65058.313.peg.1958	65058.314.peg.1882	65058.315.peg.2417	65058.316.peg.2201	2320456.3.peg.2644	65058.317.peg.760	65058.318.peg.2174	65058.319.peg.2158	65058.320.peg.1732	65058.321.peg.1743	65058.322.peg.2133	65058.323.peg.1675	65058.229.peg.2331	2320431.9.peg.2014	2320431.16.peg.2016	2320431.10.peg.2016	2320431.17.peg.2016	2320431.13.peg.2017	2320431.14.peg.2014	2320431.12.peg.2015	2320431.15.peg.2018	65058.241.peg.2421
	73	65058.435.peg.61	65058.432.peg.2556	2320431.4.peg.764	2320431.3.peg.2582	65058.401.peg.2249	65058.405.peg.2189	65058.406.peg.2159	65058.410.peg.2154	65058.411.peg.2118	65058.370.peg.1824	65058.373.peg.1824	65058.374.peg.1418	65058.375.peg.2356	65058.376.peg.757	65058.437.peg.1840	65058.385.peg.1933	65058.419.peg.1849	65058.361.peg.1884	65058.362.peg.2264	65058.363.peg.2197	65058.420.peg.1997	65058.421.peg.2182	65058.428.peg.1900	65058.426.peg.2091	65058.313.peg.1959	65058.314.peg.1883	65058.315.peg.2418	65058.316.peg.2202	2320456.3.peg.2643	65058.317.peg.759	65058.318.peg.2173	65058.319.peg.2157	65058.320.peg.1733	65058.321.peg.1742	65058.322.peg.2134	65058.323.peg.1674	65058.229.peg.2330	2320431.9.peg.2013	2320431.16.peg.2015	2320431.10.peg.2015	2320431.17.peg.2015	2320431.13.peg.2016	2320431.14.peg.2013	2320431.12.peg.2014	2320431.15.peg.2017	65058.241.peg.2422
	74	65058.435.peg.62	65058.432.peg.2555	2320431.4.peg.763	2320431.3.peg.2583	65058.401.peg.2248	65058.405.peg.2188	65058.406.peg.2160	65058.410.peg.2155	65058.411.peg.2119	65058.370.peg.1823	65058.373.peg.1823	65058.374.peg.1419	65058.375.peg.2355	65058.376.peg.756	65058.437.peg.1841	65058.385.peg.1934	65058.419.peg.1848	65058.361.peg.1885	65058.362.peg.2263	65058.363.peg.2196	65058.420.peg.1998	65058.421.peg.2183	65058.428.peg.1899	65058.426.peg.2090	65058.313.peg.1960	65058.314.peg.1884	65058.315.peg.2419	65058.316.peg.2203	2320456.3.peg.2642	65058.317.peg.758	65058.318.peg.2172	65058.319.peg.2156	65058.320.peg.1734	65058.321.peg.1741	65058.322.peg.2135	65058.323.peg.1673	65058.229.peg.2329	2320431.9.peg.2012	2320431.16.peg.2014	2320431.10.peg.2014	2320431.17.peg.2014	2320431.13.peg.2015	2320431.14.peg.2012	2320431.12.peg.2013	2320431.15.peg.2016	65058.241.peg.2423
	75	65058.435.peg.137	65058.432.peg.121	2320431.4.peg.688	2320431.3.peg.696	65058.401.peg.684	65058.405.peg.2	65058.406.peg.643	65058.410.peg.687	65058.411.peg.2624	65058.370.peg.2	65058.373.peg.2	65058.374.peg.2	65058.375.peg.2	65058.376.peg.681	65058.437.peg.2592	65058.385.peg.2562	65058.419.peg.2	65058.361.peg.686	65058.362.peg.2	65058.363.peg.690	65058.420.peg.690	65058.421.peg.2	65058.428.peg.2	65058.426.peg.2	65058.313.peg.686	65058.314.peg.1117	65058.315.peg.459	65058.316.peg.687	2320456.3.peg.693	65058.317.peg.682	65058.318.peg.647	65058.319.peg.643	65058.320.peg.2	65058.321.peg.2513	65058.322.peg.637	65058.323.peg.644	65058.229.peg.2	2320431.9.peg.1936	2320431.16.peg.1939	2320431.10.peg.1938	2320431.17.peg.1939	2320431.13.peg.1940	2320431.14.peg.1937	2320431.12.peg.1938	2320431.15.peg.1941	65058.241.peg.75
	76	65058.435.peg.138	65058.432.peg.122	2320431.4.peg.687	2320431.3.peg.695	65058.401.peg.683	65058.405.peg.3	65058.406.peg.642	65058.410.peg.686	65058.411.peg.2623	65058.370.peg.3	65058.373.peg.3	65058.374.peg.3	65058.375.peg.3	65058.376.peg.680	65058.437.peg.2591	65058.385.peg.2563	65058.419.peg.3	65058.361.peg.685	65058.362.peg.3	65058.363.peg.689	65058.420.peg.689	65058.421.peg.3	65058.428.peg.3	65058.426.peg.3	65058.313.peg.685	65058.314.peg.1118	65058.315.peg.458	65058.316.peg.686	2320456.3.peg.692	65058.317.peg.681	65058.318.peg.646	65058.319.peg.642	65058.320.peg.3	65058.321.peg.2512	65058.322.peg.636	65058.323.peg.643	65058.229.peg.3	2320431.9.peg.1935	2320431.16.peg.1938	2320431.10.peg.1937	2320431.17.peg.1938	2320431.13.peg.1939	2320431.14.peg.1936	2320431.12.peg.1937	2320431.15.peg.1940	65058.241.peg.76
	77	65058.435.peg.139	65058.432.peg.123	2320431.4.peg.686	2320431.3.peg.694	65058.401.peg.682	65058.405.peg.4	65058.406.peg.641	65058.410.peg.685	65058.411.peg.644	65058.370.peg.4	65058.373.peg.4	65058.374.peg.4	65058.375.peg.4	65058.376.peg.679	65058.437.peg.2590	65058.385.peg.2564	65058.419.peg.4	65058.361.peg.684	65058.362.peg.4	65058.363.peg.688	65058.420.peg.688	65058.421.peg.4	65058.428.peg.4	65058.426.peg.4	65058.313.peg.684	65058.314.peg.1119	65058.315.peg.457	65058.316.peg.685	2320456.3.peg.691	65058.317.peg.680	65058.318.peg.645	65058.319.peg.641	65058.320.peg.4	65058.321.peg.2511	65058.322.peg.635	65058.323.peg.642	65058.229.peg.4	2320431.9.peg.1934	2320431.16.peg.1937	2320431.10.peg.1936	2320431.17.peg.1937	2320431.13.peg.1938	2320431.14.peg.1935	2320431.12.peg.1936	2320431.15.peg.1939	65058.241.peg.77
	78	65058.435.peg.140	65058.432.peg.124	2320431.4.peg.685	2320431.3.peg.693	65058.401.peg.681	65058.405.peg.5	65058.406.peg.640	65058.410.peg.684	65058.411.peg.643	65058.370.peg.5	65058.373.peg.5	65058.374.peg.5	65058.375.peg.5	65058.376.peg.678	65058.437.peg.2589	65058.385.peg.2565	65058.419.peg.5	65058.361.peg.683	65058.362.peg.5	65058.363.peg.687	65058.420.peg.687	65058.421.peg.5	65058.428.peg.5	65058.426.peg.5	65058.313.peg.683	65058.314.peg.1120	65058.315.peg.456	65058.316.peg.684	2320456.3.peg.690	65058.317.peg.679	65058.318.peg.644	65058.319.peg.640	65058.320.peg.5	65058.321.peg.2510	65058.322.peg.634	65058.323.peg.641	65058.229.peg.5	2320431.9.peg.1933	2320431.16.peg.1936	2320431.10.peg.1935	2320431.17.peg.1936	2320431.13.peg.1937	2320431.14.peg.1934	2320431.12.peg.1935	2320431.15.peg.1938	65058.241.peg.78
	79	65058.435.peg.141	65058.432.peg.125	2320431.4.peg.684	2320431.3.peg.692	65058.401.peg.680	65058.405.peg.6	65058.406.peg.639	65058.410.peg.683	65058.411.peg.642	65058.370.peg.6	65058.373.peg.6	65058.374.peg.6	65058.375.peg.6	65058.376.peg.677	65058.437.peg.2588	65058.385.peg.2566	65058.419.peg.6	65058.361.peg.682	65058.362.peg.6	65058.363.peg.686	65058.420.peg.686	65058.421.peg.6	65058.428.peg.6	65058.426.peg.6	65058.313.peg.682	65058.314.peg.1121	65058.315.peg.455	65058.316.peg.683	2320456.3.peg.689	65058.317.peg.678	65058.318.peg.643	65058.319.peg.639	65058.320.peg.6	65058.321.peg.2509	65058.322.peg.633	65058.323.peg.640	65058.229.peg.6	2320431.9.peg.1932	2320431.16.peg.1935	2320431.10.peg.1934	2320431.17.peg.1935	2320431.13.peg.1936	2320431.14.peg.1933	2320431.12.peg.1934	2320431.15.peg.1937	65058.241.peg.79
	80	65058.435.peg.142	65058.432.peg.126	2320431.4.peg.683	2320431.3.peg.691	65058.401.peg.679	65058.405.peg.7	65058.406.peg.638	65058.410.peg.682	65058.411.peg.641	65058.370.peg.7	65058.373.peg.7	65058.374.peg.7	65058.375.peg.7	65058.376.peg.676	65058.437.peg.2587	65058.385.peg.2567	65058.419.peg.7	65058.361.peg.681	65058.362.peg.7	65058.363.peg.685	65058.420.peg.685	65058.421.peg.7	65058.428.peg.7	65058.426.peg.7	65058.313.peg.681	65058.314.peg.1122	65058.315.peg.454	65058.316.peg.682	2320456.3.peg.688	65058.317.peg.677	65058.318.peg.642	65058.319.peg.638	65058.320.peg.7	65058.321.peg.2508	65058.322.peg.632	65058.323.peg.639	65058.229.peg.7	2320431.9.peg.1931	2320431.16.peg.1934	2320431.10.peg.1933	2320431.17.peg.1934	2320431.13.peg.1935	2320431.14.peg.1932	2320431.12.peg.1933	2320431.15.peg.1936	65058.241.peg.80
	81	65058.435.peg.143	65058.432.peg.127	2320431.4.peg.682	2320431.3.peg.690	65058.401.peg.678	65058.405.peg.8	65058.406.peg.637	65058.410.peg.681	65058.411.peg.640	65058.370.peg.8	65058.373.peg.8	65058.374.peg.8	65058.375.peg.8	65058.376.peg.675	65058.437.peg.2586	65058.385.peg.2568	65058.419.peg.8	65058.361.peg.680	65058.362.peg.8	65058.363.peg.684	65058.420.peg.684	65058.421.peg.8	65058.428.peg.8	65058.426.peg.8	65058.313.peg.680	65058.314.peg.1123	65058.315.peg.453	65058.316.peg.681	2320456.3.peg.687	65058.317.peg.676	65058.318.peg.641	65058.319.peg.637	65058.320.peg.8	65058.321.peg.2507	65058.322.peg.631	65058.323.peg.638	65058.229.peg.8	2320431.9.peg.1930	2320431.16.peg.1933	2320431.10.peg.1932	2320431.17.peg.1933	2320431.13.peg.1934	2320431.14.peg.1931	2320431.12.peg.1932	2320431.15.peg.1935	65058.241.peg.81
	82	65058.435.peg.144	65058.432.peg.128	2320431.4.peg.681	2320431.3.peg.689	65058.401.peg.677	65058.405.peg.9	65058.406.peg.636	65058.410.peg.680	65058.411.peg.639	65058.370.peg.9	65058.373.peg.9	65058.374.peg.9	65058.375.peg.9	65058.376.peg.674	65058.437.peg.2585	65058.385.peg.2569	65058.419.peg.9	65058.361.peg.679	65058.362.peg.9	65058.363.peg.683	65058.420.peg.683	65058.421.peg.9	65058.428.peg.9	65058.426.peg.9	65058.313.peg.679	65058.314.peg.1124	65058.315.peg.452	65058.316.peg.680	2320456.3.peg.686	65058.317.peg.675	65058.318.peg.640	65058.319.peg.636	65058.320.peg.9	65058.321.peg.2506	65058.322.peg.630	65058.323.peg.637	65058.229.peg.9	2320431.9.peg.1929	2320431.16.peg.1932	2320431.10.peg.1931	2320431.17.peg.1932	2320431.13.peg.1933	2320431.14.peg.1930	2320431.12.peg.1931	2320431.15.peg.1934	65058.241.peg.82
	83	65058.435.peg.146	65058.432.peg.130	2320431.4.peg.679	2320431.3.peg.687	65058.401.peg.675	65058.405.peg.11	65058.406.peg.634	65058.410.peg.678	65058.411.peg.637	65058.370.peg.11	65058.373.peg.11	65058.374.peg.11	65058.375.peg.12	65058.376.peg.672	65058.437.peg.2583	65058.385.peg.2571	65058.419.peg.11	65058.361.peg.677	65058.362.peg.11	65058.363.peg.681	65058.420.peg.682	65058.421.peg.11	65058.428.peg.11	65058.426.peg.11	65058.313.peg.677	65058.314.peg.1126	65058.315.peg.450	65058.316.peg.678	2320456.3.peg.685	65058.317.peg.673	65058.318.peg.638	65058.319.peg.634	65058.320.peg.11	65058.321.peg.2504	65058.322.peg.628	65058.323.peg.635	65058.229.peg.11	2320431.9.peg.1927	2320431.16.peg.1930	2320431.10.peg.1929	2320431.17.peg.1930	2320431.13.peg.1931	2320431.14.peg.1928	2320431.12.peg.1929	2320431.15.peg.1932	65058.241.peg.84
	84	65058.435.peg.147	65058.432.peg.131	2320431.4.peg.678	2320431.3.peg.686	65058.401.peg.674	65058.405.peg.12	65058.406.peg.633	65058.410.peg.677	65058.411.peg.636	65058.370.peg.12	65058.373.peg.12	65058.374.peg.12	65058.375.peg.13	65058.376.peg.671	65058.437.peg.2582	65058.385.peg.2572	65058.419.peg.12	65058.361.peg.676	65058.362.peg.12	65058.363.peg.680	65058.420.peg.681	65058.421.peg.12	65058.428.peg.12	65058.426.peg.12	65058.313.peg.676	65058.314.peg.1127	65058.315.peg.449	65058.316.peg.677	2320456.3.peg.684	65058.317.peg.672	65058.318.peg.637	65058.319.peg.633	65058.320.peg.12	65058.321.peg.2503	65058.322.peg.627	65058.323.peg.634	65058.229.peg.12	2320431.9.peg.1926	2320431.16.peg.1929	2320431.10.peg.1928	2320431.17.peg.1929	2320431.13.peg.1930	2320431.14.peg.1927	2320431.12.peg.1928	2320431.15.peg.1931	65058.241.peg.85
	85	65058.435.peg.148	65058.432.peg.132	2320431.4.peg.677	2320431.3.peg.685	65058.401.peg.673	65058.405.peg.13	65058.406.peg.632	65058.410.peg.676	65058.411.peg.635	65058.370.peg.13	65058.373.peg.13	65058.374.peg.13	65058.375.peg.14	65058.376.peg.670	65058.437.peg.2581	65058.385.peg.2573	65058.419.peg.13	65058.361.peg.675	65058.362.peg.13	65058.363.peg.679	65058.420.peg.680	65058.421.peg.13	65058.428.peg.13	65058.426.peg.13	65058.313.peg.675	65058.314.peg.1128	65058.315.peg.448	65058.316.peg.676	2320456.3.peg.683	65058.317.peg.671	65058.318.peg.636	65058.319.peg.632	65058.320.peg.13	65058.321.peg.2502	65058.322.peg.626	65058.323.peg.633	65058.229.peg.13	2320431.9.peg.1925	2320431.16.peg.1928	2320431.10.peg.1927	2320431.17.peg.1928	2320431.13.peg.1929	2320431.14.peg.1926	2320431.12.peg.1927	2320431.15.peg.1930	65058.241.peg.86
	86	65058.435.peg.150	65058.432.peg.133	2320431.4.peg.675	2320431.3.peg.683	65058.401.peg.671	65058.405.peg.15	65058.406.peg.630	65058.410.peg.674	65058.411.peg.633	65058.370.peg.15	65058.373.peg.15	65058.374.peg.15	65058.375.peg.16	65058.376.peg.668	65058.437.peg.2579	65058.385.peg.2575	65058.419.peg.15	65058.361.peg.673	65058.362.peg.15	65058.363.peg.677	65058.420.peg.678	65058.421.peg.15	65058.428.peg.15	65058.426.peg.15	65058.313.peg.673	65058.314.peg.1130	65058.315.peg.446	65058.316.peg.674	2320456.3.peg.681	65058.317.peg.669	65058.318.peg.634	65058.319.peg.630	65058.320.peg.15	65058.321.peg.2500	65058.322.peg.624	65058.323.peg.631	65058.229.peg.15	2320431.9.peg.1924	2320431.16.peg.1927	2320431.10.peg.1926	2320431.17.peg.1927	2320431.13.peg.1928	2320431.14.peg.1925	2320431.12.peg.1926	2320431.15.peg.1929	65058.241.peg.88
	87	65058.435.peg.151	65058.432.peg.134	2320431.4.peg.674	2320431.3.peg.682	65058.401.peg.670	65058.405.peg.16	65058.406.peg.629	65058.410.peg.673	65058.411.peg.632	65058.370.peg.16	65058.373.peg.16	65058.374.peg.16	65058.375.peg.17	65058.376.peg.667	65058.437.peg.2578	65058.385.peg.2576	65058.419.peg.16	65058.361.peg.672	65058.362.peg.16	65058.363.peg.676	65058.420.peg.677	65058.421.peg.16	65058.428.peg.16	65058.426.peg.16	65058.313.peg.672	65058.314.peg.1131	65058.315.peg.445	65058.316.peg.673	2320456.3.peg.680	65058.317.peg.668	65058.318.peg.633	65058.319.peg.629	65058.320.peg.16	65058.321.peg.2499	65058.322.peg.623	65058.323.peg.630	65058.229.peg.16	2320431.9.peg.1923	2320431.16.peg.1926	2320431.10.peg.1925	2320431.17.peg.1926	2320431.13.peg.1927	2320431.14.peg.1924	2320431.12.peg.1925	2320431.15.peg.1928	65058.241.peg.89
	88	65058.435.peg.152	65058.432.peg.135	2320431.4.peg.673	2320431.3.peg.681	65058.401.peg.669	65058.405.peg.17	65058.406.peg.628	65058.410.peg.672	65058.411.peg.631	65058.370.peg.17	65058.373.peg.17	65058.374.peg.17	65058.375.peg.18	65058.376.peg.666	65058.437.peg.2577	65058.385.peg.2577	65058.419.peg.17	65058.361.peg.671	65058.362.peg.17	65058.363.peg.675	65058.420.peg.676	65058.421.peg.17	65058.428.peg.17	65058.426.peg.17	65058.313.peg.671	65058.314.peg.1132	65058.315.peg.444	65058.316.peg.672	2320456.3.peg.679	65058.317.peg.667	65058.318.peg.632	65058.319.peg.628	65058.320.peg.17	65058.321.peg.2498	65058.322.peg.622	65058.323.peg.629	65058.229.peg.17	2320431.9.peg.1922	2320431.16.peg.1925	2320431.10.peg.1924	2320431.17.peg.1925	2320431.13.peg.1926	2320431.14.peg.1923	2320431.12.peg.1924	2320431.15.peg.1927	65058.241.peg.90
	89	65058.435.peg.153	65058.432.peg.136	2320431.4.peg.672	2320431.3.peg.680	65058.401.peg.668	65058.405.peg.18	65058.406.peg.627	65058.410.peg.671	65058.411.peg.630	65058.370.peg.18	65058.373.peg.18	65058.374.peg.18	65058.375.peg.19	65058.376.peg.665	65058.437.peg.2576	65058.385.peg.2578	65058.419.peg.18	65058.361.peg.670	65058.362.peg.18	65058.363.peg.674	65058.420.peg.675	65058.421.peg.18	65058.428.peg.18	65058.426.peg.18	65058.313.peg.670	65058.314.peg.1133	65058.315.peg.443	65058.316.peg.671	2320456.3.peg.678	65058.317.peg.666	65058.318.peg.631	65058.319.peg.627	65058.320.peg.18	65058.321.peg.2497	65058.322.peg.621	65058.323.peg.628	65058.229.peg.18	2320431.9.peg.1921	2320431.16.peg.1924	2320431.10.peg.1923	2320431.17.peg.1924	2320431.13.peg.1925	2320431.14.peg.1922	2320431.12.peg.1923	2320431.15.peg.1926	65058.241.peg.91
	90	65058.435.peg.157	65058.432.peg.138	2320431.4.peg.669	2320431.3.peg.678	65058.401.peg.665	65058.405.peg.20	65058.406.peg.624	65058.410.peg.668	65058.411.peg.626	65058.370.peg.20	65058.373.peg.20	65058.374.peg.22	65058.375.peg.23	65058.376.peg.663	65058.437.peg.2573	65058.385.peg.2581	65058.419.peg.20	65058.361.peg.666	65058.362.peg.20	65058.363.peg.670	65058.420.peg.672	65058.421.peg.21	65058.428.peg.21	65058.426.peg.22	65058.313.peg.667	65058.314.peg.1136	65058.315.peg.440	65058.316.peg.669	2320456.3.peg.676	65058.317.peg.664	65058.318.peg.627	65058.319.peg.623	65058.320.peg.22	65058.321.peg.2495	65058.322.peg.617	65058.323.peg.624	65058.229.peg.22	2320431.9.peg.1918	2320431.16.peg.1921	2320431.10.peg.1920	2320431.17.peg.1921	2320431.13.peg.1922	2320431.14.peg.1919	2320431.12.peg.1920	2320431.15.peg.1923	65058.241.peg.94
	91	65058.435.peg.158	65058.432.peg.139	2320431.4.peg.668	2320431.3.peg.677	65058.401.peg.664	65058.405.peg.21	65058.406.peg.623	65058.410.peg.667	65058.411.peg.625	65058.370.peg.21	65058.373.peg.21	65058.374.peg.23	65058.375.peg.24	65058.376.peg.662	65058.437.peg.1	65058.385.peg.802	65058.419.peg.21	65058.361.peg.665	65058.362.peg.21	65058.363.peg.669	65058.420.peg.671	65058.421.peg.22	65058.428.peg.22	65058.426.peg.23	65058.313.peg.666	65058.314.peg.1137	65058.315.peg.439	65058.316.peg.668	2320456.3.peg.675	65058.317.peg.663	65058.318.peg.626	65058.319.peg.622	65058.320.peg.23	65058.321.peg.368	65058.322.peg.616	65058.323.peg.623	65058.229.peg.23	2320431.9.peg.1917	2320431.16.peg.1920	2320431.10.peg.1919	2320431.17.peg.1920	2320431.13.peg.1921	2320431.14.peg.1918	2320431.12.peg.1919	2320431.15.peg.1922	65058.241.peg.95
	92	65058.435.peg.159	65058.432.peg.140	2320431.4.peg.667	2320431.3.peg.676	65058.401.peg.663	65058.405.peg.22	65058.406.peg.622	65058.410.peg.666	65058.411.peg.624	65058.370.peg.22	65058.373.peg.22	65058.374.peg.24	65058.375.peg.25	65058.376.peg.661	65058.437.peg.2	65058.385.peg.803	65058.419.peg.22	65058.361.peg.664	65058.362.peg.22	65058.363.peg.668	65058.420.peg.670	65058.421.peg.23	65058.428.peg.23	65058.426.peg.24	65058.313.peg.665	65058.314.peg.1138	65058.315.peg.438	65058.316.peg.667	2320456.3.peg.674	65058.317.peg.662	65058.318.peg.625	65058.319.peg.621	65058.320.peg.24	65058.321.peg.367	65058.322.peg.615	65058.323.peg.622	65058.229.peg.24	2320431.9.peg.1916	2320431.16.peg.1919	2320431.10.peg.1918	2320431.17.peg.1919	2320431.13.peg.1920	2320431.14.peg.1917	2320431.12.peg.1918	2320431.15.peg.1921	65058.241.peg.96
	93	65058.435.peg.160	65058.432.peg.141	2320431.4.peg.666	2320431.3.peg.675	65058.401.peg.662	65058.405.peg.23	65058.406.peg.621	65058.410.peg.665	65058.411.peg.623	65058.370.peg.23	65058.373.peg.23	65058.374.peg.25	65058.375.peg.26	65058.376.peg.660	65058.437.peg.3	65058.385.peg.804	65058.419.peg.23	65058.361.peg.663	65058.362.peg.23	65058.363.peg.667	65058.420.peg.669	65058.421.peg.24	65058.428.peg.24	65058.426.peg.25	65058.313.peg.664	65058.314.peg.1139	65058.315.peg.437	65058.316.peg.666	2320456.3.peg.673	65058.317.peg.661	65058.318.peg.624	65058.319.peg.620	65058.320.peg.25	65058.321.peg.366	65058.322.peg.614	65058.323.peg.621	65058.229.peg.25	2320431.9.peg.1915	2320431.16.peg.1918	2320431.10.peg.1917	2320431.17.peg.1918	2320431.13.peg.1919	2320431.14.peg.1916	2320431.12.peg.1917	2320431.15.peg.1920	65058.241.peg.97
	94	65058.435.peg.161	65058.432.peg.142	2320431.4.peg.665	2320431.3.peg.674	65058.401.peg.661	65058.405.peg.24	65058.406.peg.620	65058.410.peg.664	65058.411.peg.622	65058.370.peg.24	65058.373.peg.24	65058.374.peg.26	65058.375.peg.27	65058.376.peg.659	65058.437.peg.4	65058.385.peg.805	65058.419.peg.24	65058.361.peg.662	65058.362.peg.24	65058.363.peg.666	65058.420.peg.668	65058.421.peg.25	65058.428.peg.25	65058.426.peg.26	65058.313.peg.663	65058.314.peg.1140	65058.315.peg.436	65058.316.peg.665	2320456.3.peg.672	65058.317.peg.660	65058.318.peg.623	65058.319.peg.619	65058.320.peg.26	65058.321.peg.365	65058.322.peg.613	65058.323.peg.620	65058.229.peg.26	2320431.9.peg.1914	2320431.16.peg.1917	2320431.10.peg.1916	2320431.17.peg.1917	2320431.13.peg.1918	2320431.14.peg.1915	2320431.12.peg.1916	2320431.15.peg.1919	65058.241.peg.98
	95	65058.435.peg.162	65058.432.peg.143	2320431.4.peg.664	2320431.3.peg.673	65058.401.peg.660	65058.405.peg.25	65058.406.peg.619	65058.410.peg.663	65058.411.peg.621	65058.370.peg.25	65058.373.peg.25	65058.374.peg.27	65058.375.peg.28	65058.376.peg.658	65058.437.peg.5	65058.385.peg.806	65058.419.peg.25	65058.361.peg.661	65058.362.peg.25	65058.363.peg.665	65058.420.peg.667	65058.421.peg.26	65058.428.peg.26	65058.426.peg.27	65058.313.peg.662	65058.314.peg.1141	65058.315.peg.435	65058.316.peg.664	2320456.3.peg.671	65058.317.peg.659	65058.318.peg.622	65058.319.peg.618	65058.320.peg.27	65058.321.peg.364	65058.322.peg.612	65058.323.peg.619	65058.229.peg.27	2320431.9.peg.1913	2320431.16.peg.1916	2320431.10.peg.1915	2320431.17.peg.1916	2320431.13.peg.1917	2320431.14.peg.1914	2320431.12.peg.1915	2320431.15.peg.1918	65058.241.peg.99
	96	65058.435.peg.163	65058.432.peg.144	2320431.4.peg.663	2320431.3.peg.672	65058.401.peg.659	65058.405.peg.26	65058.406.peg.618	65058.410.peg.662	65058.411.peg.620	65058.370.peg.26	65058.373.peg.26	65058.374.peg.28	65058.375.peg.29	65058.376.peg.657	65058.437.peg.6	65058.385.peg.807	65058.419.peg.26	65058.361.peg.660	65058.362.peg.26	65058.363.peg.664	65058.420.peg.666	65058.421.peg.27	65058.428.peg.27	65058.426.peg.28	65058.313.peg.661	65058.314.peg.1142	65058.315.peg.434	65058.316.peg.663	2320456.3.peg.670	65058.317.peg.658	65058.318.peg.621	65058.319.peg.617	65058.320.peg.28	65058.321.peg.363	65058.322.peg.611	65058.323.peg.618	65058.229.peg.28	2320431.9.peg.1912	2320431.16.peg.1915	2320431.10.peg.1914	2320431.17.peg.1915	2320431.13.peg.1916	2320431.14.peg.1913	2320431.12.peg.1914	2320431.15.peg.1917	65058.241.peg.100
	97	65058.435.peg.165	65058.432.peg.146	2320431.4.peg.661	2320431.3.peg.670	65058.401.peg.658	65058.405.peg.27	65058.406.peg.617	65058.410.peg.660	65058.411.peg.619	65058.370.peg.27	65058.373.peg.27	65058.374.peg.29	65058.375.peg.30	65058.376.peg.656	65058.437.peg.7	65058.385.peg.808	65058.419.peg.27	65058.361.peg.659	65058.362.peg.27	65058.363.peg.663	65058.420.peg.664	65058.421.peg.28	65058.428.peg.29	65058.426.peg.29	65058.313.peg.660	65058.314.peg.1143	65058.315.peg.433	65058.316.peg.662	2320456.3.peg.668	65058.317.peg.657	65058.318.peg.620	65058.319.peg.616	65058.320.peg.29	65058.321.peg.362	65058.322.peg.610	65058.323.peg.617	65058.229.peg.30	2320431.9.peg.1911	2320431.16.peg.1914	2320431.10.peg.1913	2320431.17.peg.1914	2320431.13.peg.1915	2320431.14.peg.1912	2320431.12.peg.1913	2320431.15.peg.1916	65058.241.peg.102
	98	65058.435.peg.166	65058.432.peg.147	2320431.4.peg.660	2320431.3.peg.669	65058.401.peg.657	65058.405.peg.28	65058.406.peg.616	65058.410.peg.659	65058.411.peg.618	65058.370.peg.28	65058.373.peg.28	65058.374.peg.30	65058.375.peg.31	65058.376.peg.655	65058.437.peg.8	65058.385.peg.809	65058.419.peg.28	65058.361.peg.658	65058.362.peg.28	65058.363.peg.662	65058.420.peg.663	65058.421.peg.29	65058.428.peg.30	65058.426.peg.30	65058.313.peg.659	65058.314.peg.1144	65058.315.peg.432	65058.316.peg.661	2320456.3.peg.667	65058.317.peg.656	65058.318.peg.619	65058.319.peg.615	65058.320.peg.30	65058.321.peg.361	65058.322.peg.609	65058.323.peg.616	65058.229.peg.31	2320431.9.peg.1910	2320431.16.peg.1913	2320431.10.peg.1912	2320431.17.peg.1913	2320431.13.peg.1914	2320431.14.peg.1911	2320431.12.peg.1912	2320431.15.peg.1915	65058.241.peg.103
	99	65058.435.peg.167	65058.432.peg.148	2320431.4.peg.659	2320431.3.peg.668	65058.401.peg.656	65058.405.peg.29	65058.406.peg.615	65058.410.peg.658	65058.411.peg.617	65058.370.peg.29	65058.373.peg.29	65058.374.peg.31	65058.375.peg.32	65058.376.peg.654	65058.437.peg.9	65058.385.peg.810	65058.419.peg.29	65058.361.peg.657	65058.362.peg.29	65058.363.peg.661	65058.420.peg.662	65058.421.peg.30	65058.428.peg.31	65058.426.peg.31	65058.313.peg.658	65058.314.peg.1145	65058.315.peg.431	65058.316.peg.660	2320456.3.peg.666	65058.317.peg.655	65058.318.peg.618	65058.319.peg.614	65058.320.peg.31	65058.321.peg.360	65058.322.peg.608	65058.323.peg.615	65058.229.peg.32	2320431.9.peg.1909	2320431.16.peg.1912	2320431.10.peg.1911	2320431.17.peg.1912	2320431.13.peg.1913	2320431.14.peg.1910	2320431.12.peg.1911	2320431.15.peg.1914	65058.241.peg.104
	100	65058.435.peg.168	65058.432.peg.149	2320431.4.peg.658	2320431.3.peg.667	65058.401.peg.655	65058.405.peg.30	65058.406.peg.614	65058.410.peg.657	65058.411.peg.616	65058.370.peg.30	65058.373.peg.30	65058.374.peg.32	65058.375.peg.33	65058.376.peg.653	65058.437.peg.10	65058.385.peg.811	65058.419.peg.30	65058.361.peg.656	65058.362.peg.30	65058.363.peg.660	65058.420.peg.661	65058.421.peg.31	65058.428.peg.32	65058.426.peg.32	65058.313.peg.657	65058.314.peg.1146	65058.315.peg.430	65058.316.peg.659	2320456.3.peg.665	65058.317.peg.654	65058.318.peg.617	65058.319.peg.613	65058.320.peg.32	65058.321.peg.359	65058.322.peg.607	65058.323.peg.614	65058.229.peg.33	2320431.9.peg.1908	2320431.16.peg.1911	2320431.10.peg.1910	2320431.17.peg.1911	2320431.13.peg.1912	2320431.14.peg.1909	2320431.12.peg.1910	2320431.15.peg.1913	65058.241.peg.105
	101	65058.435.peg.169	65058.432.peg.150	2320431.4.peg.657	2320431.3.peg.666	65058.401.peg.654	65058.405.peg.31	65058.406.peg.613	65058.410.peg.656	65058.411.peg.615	65058.370.peg.31	65058.373.peg.31	65058.374.peg.33	65058.375.peg.34	65058.376.peg.652	65058.437.peg.11	65058.385.peg.812	65058.419.peg.31	65058.361.peg.655	65058.362.peg.31	65058.363.peg.659	65058.420.peg.660	65058.421.peg.32	65058.428.peg.33	65058.426.peg.33	65058.313.peg.656	65058.314.peg.1147	65058.315.peg.429	65058.316.peg.658	2320456.3.peg.664	65058.317.peg.653	65058.318.peg.616	65058.319.peg.612	65058.320.peg.33	65058.321.peg.358	65058.322.peg.606	65058.323.peg.613	65058.229.peg.34	2320431.9.peg.1907	2320431.16.peg.1910	2320431.10.peg.1909	2320431.17.peg.1910	2320431.13.peg.1911	2320431.14.peg.1908	2320431.12.peg.1909	2320431.15.peg.1912	65058.241.peg.106
	102	65058.435.peg.170	65058.432.peg.151	2320431.4.peg.656	2320431.3.peg.665	65058.401.peg.653	65058.405.peg.32	65058.406.peg.612	65058.410.peg.655	65058.411.peg.614	65058.370.peg.32	65058.373.peg.32	65058.374.peg.34	65058.375.peg.35	65058.376.peg.651	65058.437.peg.12	65058.385.peg.813	65058.419.peg.32	65058.361.peg.654	65058.362.peg.32	65058.363.peg.658	65058.420.peg.659	65058.421.peg.33	65058.428.peg.34	65058.426.peg.34	65058.313.peg.655	65058.314.peg.1148	65058.315.peg.428	65058.316.peg.657	2320456.3.peg.663	65058.317.peg.652	65058.318.peg.615	65058.319.peg.611	65058.320.peg.34	65058.321.peg.357	65058.322.peg.605	65058.323.peg.612	65058.229.peg.35	2320431.9.peg.1906	2320431.16.peg.1909	2320431.10.peg.1908	2320431.17.peg.1909	2320431.13.peg.1910	2320431.14.peg.1907	2320431.12.peg.1908	2320431.15.peg.1911	65058.241.peg.107
	103	65058.435.peg.171	65058.432.peg.152	2320431.4.peg.655	2320431.3.peg.664	65058.401.peg.652	65058.405.peg.33	65058.406.peg.611	65058.410.peg.654	65058.411.peg.613	65058.370.peg.33	65058.373.peg.33	65058.374.peg.35	65058.375.peg.36	65058.376.peg.650	65058.437.peg.13	65058.385.peg.814	65058.419.peg.33	65058.361.peg.653	65058.362.peg.33	65058.363.peg.657	65058.420.peg.658	65058.421.peg.34	65058.428.peg.35	65058.426.peg.35	65058.313.peg.654	65058.314.peg.1149	65058.315.peg.427	65058.316.peg.656	2320456.3.peg.662	65058.317.peg.651	65058.318.peg.614	65058.319.peg.610	65058.320.peg.35	65058.321.peg.356	65058.322.peg.604	65058.323.peg.611	65058.229.peg.36	2320431.9.peg.1905	2320431.16.peg.1908	2320431.10.peg.1907	2320431.17.peg.1908	2320431.13.peg.1909	2320431.14.peg.1906	2320431.12.peg.1907	2320431.15.peg.1910	65058.241.peg.108
	104	65058.435.peg.172	65058.432.peg.153	2320431.4.peg.654	2320431.3.peg.663	65058.401.peg.651	65058.405.peg.34	65058.406.peg.610	65058.410.peg.653	65058.411.peg.612	65058.370.peg.34	65058.373.peg.34	65058.374.peg.36	65058.375.peg.37	65058.376.peg.649	65058.437.peg.14	65058.385.peg.815	65058.419.peg.34	65058.361.peg.652	65058.362.peg.34	65058.363.peg.656	65058.420.peg.657	65058.421.peg.35	65058.428.peg.36	65058.426.peg.36	65058.313.peg.653	65058.314.peg.1150	65058.315.peg.426	65058.316.peg.655	2320456.3.peg.661	65058.317.peg.650	65058.318.peg.613	65058.319.peg.609	65058.320.peg.36	65058.321.peg.355	65058.322.peg.603	65058.323.peg.610	65058.229.peg.37	2320431.9.peg.1904	2320431.16.peg.1907	2320431.10.peg.1906	2320431.17.peg.1907	2320431.13.peg.1908	2320431.14.peg.1905	2320431.12.peg.1906	2320431.15.peg.1909	65058.241.peg.109
	105	65058.435.peg.173	65058.432.peg.154	2320431.4.peg.653	2320431.3.peg.662	65058.401.peg.650	65058.405.peg.35	65058.406.peg.609	65058.410.peg.652	65058.411.peg.611	65058.370.peg.35	65058.373.peg.35	65058.374.peg.37	65058.375.peg.38	65058.376.peg.648	65058.437.peg.15	65058.385.peg.816	65058.419.peg.35	65058.361.peg.651	65058.362.peg.35	65058.363.peg.655	65058.420.peg.656	65058.421.peg.36	65058.428.peg.37	65058.426.peg.37	65058.313.peg.652	65058.314.peg.1151	65058.315.peg.425	65058.316.peg.654	2320456.3.peg.660	65058.317.peg.649	65058.318.peg.612	65058.319.peg.608	65058.320.peg.37	65058.321.peg.354	65058.322.peg.602	65058.323.peg.609	65058.229.peg.38	2320431.9.peg.1903	2320431.16.peg.1906	2320431.10.peg.1905	2320431.17.peg.1906	2320431.13.peg.1907	2320431.14.peg.1904	2320431.12.peg.1905	2320431.15.peg.1908	65058.241.peg.111
	106	65058.435.peg.174	65058.432.peg.155	2320431.4.peg.652	2320431.3.peg.661	65058.401.peg.649	65058.405.peg.36	65058.406.peg.608	65058.410.peg.651	65058.411.peg.610	65058.370.peg.36	65058.373.peg.36	65058.374.peg.38	65058.375.peg.39	65058.376.peg.647	65058.437.peg.16	65058.385.peg.817	65058.419.peg.36	65058.361.peg.650	65058.362.peg.36	65058.363.peg.654	65058.420.peg.655	65058.421.peg.37	65058.428.peg.38	65058.426.peg.38	65058.313.peg.651	65058.314.peg.1152	65058.315.peg.424	65058.316.peg.653	2320456.3.peg.659	65058.317.peg.648	65058.318.peg.611	65058.319.peg.607	65058.320.peg.38	65058.321.peg.353	65058.322.peg.601	65058.323.peg.608	65058.229.peg.39	2320431.9.peg.1902	2320431.16.peg.1905	2320431.10.peg.1904	2320431.17.peg.1905	2320431.13.peg.1906	2320431.14.peg.1903	2320431.12.peg.1904	2320431.15.peg.1907	65058.241.peg.112
	107	65058.435.peg.175	65058.432.peg.156	2320431.4.peg.651	2320431.3.peg.660	65058.401.peg.648	65058.405.peg.37	65058.406.peg.607	65058.410.peg.650	65058.411.peg.609	65058.370.peg.37	65058.373.peg.37	65058.374.peg.39	65058.375.peg.40	65058.376.peg.646	65058.437.peg.17	65058.385.peg.818	65058.419.peg.37	65058.361.peg.649	65058.362.peg.37	65058.363.peg.653	65058.420.peg.654	65058.421.peg.38	65058.428.peg.39	65058.426.peg.39	65058.313.peg.650	65058.314.peg.1153	65058.315.peg.423	65058.316.peg.652	2320456.3.peg.658	65058.317.peg.647	65058.318.peg.610	65058.319.peg.606	65058.320.peg.39	65058.321.peg.352	65058.322.peg.600	65058.323.peg.607	65058.229.peg.40	2320431.9.peg.1901	2320431.16.peg.1904	2320431.10.peg.1903	2320431.17.peg.1904	2320431.13.peg.1905	2320431.14.peg.1902	2320431.12.peg.1903	2320431.15.peg.1906	65058.241.peg.113
	108	65058.435.peg.176	65058.432.peg.157	2320431.4.peg.650	2320431.3.peg.659	65058.401.peg.647	65058.405.peg.38	65058.406.peg.606	65058.410.peg.649	65058.411.peg.608	65058.370.peg.38	65058.373.peg.38	65058.374.peg.40	65058.375.peg.41	65058.376.peg.645	65058.437.peg.18	65058.385.peg.819	65058.419.peg.38	65058.361.peg.648	65058.362.peg.38	65058.363.peg.652	65058.420.peg.653	65058.421.peg.39	65058.428.peg.40	65058.426.peg.40	65058.313.peg.649	65058.314.peg.1154	65058.315.peg.422	65058.316.peg.651	2320456.3.peg.657	65058.317.peg.646	65058.318.peg.609	65058.319.peg.605	65058.320.peg.40	65058.321.peg.351	65058.322.peg.599	65058.323.peg.606	65058.229.peg.41	2320431.9.peg.1900	2320431.16.peg.1903	2320431.10.peg.1902	2320431.17.peg.1903	2320431.13.peg.1904	2320431.14.peg.1901	2320431.12.peg.1902	2320431.15.peg.1905	65058.241.peg.114
	109	65058.435.peg.177	65058.432.peg.158	2320431.4.peg.649	2320431.3.peg.658	65058.401.peg.646	65058.405.peg.39	65058.406.peg.605	65058.410.peg.648	65058.411.peg.607	65058.370.peg.39	65058.373.peg.39	65058.374.peg.41	65058.375.peg.42	65058.376.peg.644	65058.437.peg.19	65058.385.peg.820	65058.419.peg.39	65058.361.peg.647	65058.362.peg.39	65058.363.peg.651	65058.420.peg.652	65058.421.peg.40	65058.428.peg.41	65058.426.peg.41	65058.313.peg.648	65058.314.peg.1155	65058.315.peg.421	65058.316.peg.650	2320456.3.peg.656	65058.317.peg.645	65058.318.peg.608	65058.319.peg.604	65058.320.peg.41	65058.321.peg.350	65058.322.peg.598	65058.323.peg.605	65058.229.peg.42	2320431.9.peg.1899	2320431.16.peg.1902	2320431.10.peg.1901	2320431.17.peg.1902	2320431.13.peg.1903	2320431.14.peg.1900	2320431.12.peg.1901	2320431.15.peg.1904	65058.241.peg.115
	110	65058.435.peg.178	65058.432.peg.159	2320431.4.peg.648	2320431.3.peg.657	65058.401.peg.645	65058.405.peg.40	65058.406.peg.604	65058.410.peg.647	65058.411.peg.606	65058.370.peg.40	65058.373.peg.40	65058.374.peg.42	65058.375.peg.43	65058.376.peg.643	65058.437.peg.20	65058.385.peg.821	65058.419.peg.40	65058.361.peg.646	65058.362.peg.40	65058.363.peg.650	65058.420.peg.651	65058.421.peg.41	65058.428.peg.42	65058.426.peg.42	65058.313.peg.647	65058.314.peg.1156	65058.315.peg.420	65058.316.peg.649	2320456.3.peg.655	65058.317.peg.644	65058.318.peg.607	65058.319.peg.603	65058.320.peg.42	65058.321.peg.349	65058.322.peg.597	65058.323.peg.604	65058.229.peg.43	2320431.9.peg.1898	2320431.16.peg.1901	2320431.10.peg.1900	2320431.17.peg.1901	2320431.13.peg.1902	2320431.14.peg.1899	2320431.12.peg.1900	2320431.15.peg.1903	65058.241.peg.116
	111	65058.435.peg.179	65058.432.peg.160	2320431.4.peg.647	2320431.3.peg.656	65058.401.peg.644	65058.405.peg.41	65058.406.peg.603	65058.410.peg.646	65058.411.peg.605	65058.370.peg.41	65058.373.peg.41	65058.374.peg.43	65058.375.peg.44	65058.376.peg.642	65058.437.peg.21	65058.385.peg.822	65058.419.peg.41	65058.361.peg.645	65058.362.peg.41	65058.363.peg.649	65058.420.peg.650	65058.421.peg.42	65058.428.peg.43	65058.426.peg.43	65058.313.peg.646	65058.314.peg.1157	65058.315.peg.419	65058.316.peg.648	2320456.3.peg.654	65058.317.peg.643	65058.318.peg.606	65058.319.peg.602	65058.320.peg.43	65058.321.peg.348	65058.322.peg.596	65058.323.peg.603	65058.229.peg.44	2320431.9.peg.1897	2320431.16.peg.1900	2320431.10.peg.1899	2320431.17.peg.1900	2320431.13.peg.1901	2320431.14.peg.1898	2320431.12.peg.1899	2320431.15.peg.1902	65058.241.peg.117
	112	65058.435.peg.180	65058.432.peg.161	2320431.4.peg.646	2320431.3.peg.655	65058.401.peg.643	65058.405.peg.42	65058.406.peg.602	65058.410.peg.645	65058.411.peg.604	65058.370.peg.42	65058.373.peg.42	65058.374.peg.44	65058.375.peg.45	65058.376.peg.641	65058.437.peg.22	65058.385.peg.823	65058.419.peg.42	65058.361.peg.644	65058.362.peg.42	65058.363.peg.648	65058.420.peg.649	65058.421.peg.43	65058.428.peg.44	65058.426.peg.44	65058.313.peg.645	65058.314.peg.1158	65058.315.peg.418	65058.316.peg.647	2320456.3.peg.653	65058.317.peg.642	65058.318.peg.605	65058.319.peg.601	65058.320.peg.44	65058.321.peg.347	65058.322.peg.595	65058.323.peg.602	65058.229.peg.45	2320431.9.peg.1896	2320431.16.peg.1899	2320431.10.peg.1898	2320431.17.peg.1899	2320431.13.peg.1900	2320431.14.peg.1897	2320431.12.peg.1898	2320431.15.peg.1901	65058.241.peg.118
	113	65058.435.peg.181	65058.432.peg.162	2320431.4.peg.645	2320431.3.peg.654	65058.401.peg.642	65058.405.peg.43	65058.406.peg.601	65058.410.peg.644	65058.411.peg.603	65058.370.peg.43	65058.373.peg.43	65058.374.peg.45	65058.375.peg.46	65058.376.peg.640	65058.437.peg.23	65058.385.peg.824	65058.419.peg.43	65058.361.peg.643	65058.362.peg.43	65058.363.peg.647	65058.420.peg.648	65058.421.peg.44	65058.428.peg.45	65058.426.peg.45	65058.313.peg.644	65058.314.peg.1159	65058.315.peg.417	65058.316.peg.646	2320456.3.peg.652	65058.317.peg.641	65058.318.peg.604	65058.319.peg.600	65058.320.peg.45	65058.321.peg.346	65058.322.peg.594	65058.323.peg.601	65058.229.peg.46	2320431.9.peg.1895	2320431.16.peg.1898	2320431.10.peg.1897	2320431.17.peg.1898	2320431.13.peg.1899	2320431.14.peg.1896	2320431.12.peg.1897	2320431.15.peg.1900	65058.241.peg.119
	114	65058.435.peg.183	65058.432.peg.164	2320431.4.peg.644	2320431.3.peg.652	65058.401.peg.641	65058.405.peg.44	65058.406.peg.600	65058.410.peg.643	65058.411.peg.602	65058.370.peg.44	65058.373.peg.44	65058.374.peg.46	65058.375.peg.47	65058.376.peg.639	65058.437.peg.24	65058.385.peg.825	65058.419.peg.44	65058.361.peg.642	65058.362.peg.44	65058.363.peg.646	65058.420.peg.647	65058.421.peg.45	65058.428.peg.46	65058.426.peg.46	65058.313.peg.643	65058.314.peg.1160	65058.315.peg.416	65058.316.peg.645	2320456.3.peg.650	65058.317.peg.640	65058.318.peg.603	65058.319.peg.599	65058.320.peg.46	65058.321.peg.345	65058.322.peg.593	65058.323.peg.600	65058.229.peg.48	2320431.9.peg.1894	2320431.16.peg.1897	2320431.10.peg.1896	2320431.17.peg.1897	2320431.13.peg.1898	2320431.14.peg.1895	2320431.12.peg.1896	2320431.15.peg.1899	65058.241.peg.121
	115	65058.435.peg.184	65058.432.peg.165	2320431.4.peg.643	2320431.3.peg.651	65058.401.peg.640	65058.405.peg.45	65058.406.peg.599	65058.410.peg.642	65058.411.peg.601	65058.370.peg.45	65058.373.peg.45	65058.374.peg.47	65058.375.peg.48	65058.376.peg.638	65058.437.peg.25	65058.385.peg.826	65058.419.peg.45	65058.361.peg.641	65058.362.peg.45	65058.363.peg.645	65058.420.peg.646	65058.421.peg.46	65058.428.peg.47	65058.426.peg.47	65058.313.peg.642	65058.314.peg.1161	65058.315.peg.415	65058.316.peg.644	2320456.3.peg.649	65058.317.peg.639	65058.318.peg.602	65058.319.peg.598	65058.320.peg.47	65058.321.peg.344	65058.322.peg.592	65058.323.peg.599	65058.229.peg.49	2320431.9.peg.1893	2320431.16.peg.1896	2320431.10.peg.1895	2320431.17.peg.1896	2320431.13.peg.1897	2320431.14.peg.1894	2320431.12.peg.1895	2320431.15.peg.1898	65058.241.peg.122
	116	65058.435.peg.185	65058.432.peg.166	2320431.4.peg.642	2320431.3.peg.650	65058.401.peg.639	65058.405.peg.46	65058.406.peg.598	65058.410.peg.641	65058.411.peg.600	65058.370.peg.46	65058.373.peg.46	65058.374.peg.48	65058.375.peg.49	65058.376.peg.637	65058.437.peg.26	65058.385.peg.827	65058.419.peg.46	65058.361.peg.640	65058.362.peg.46	65058.363.peg.644	65058.420.peg.645	65058.421.peg.47	65058.428.peg.48	65058.426.peg.48	65058.313.peg.641	65058.314.peg.1162	65058.315.peg.414	65058.316.peg.643	2320456.3.peg.648	65058.317.peg.638	65058.318.peg.601	65058.319.peg.597	65058.320.peg.48	65058.321.peg.343	65058.322.peg.591	65058.323.peg.598	65058.229.peg.50	2320431.9.peg.1892	2320431.16.peg.1895	2320431.10.peg.1894	2320431.17.peg.1895	2320431.13.peg.1896	2320431.14.peg.1893	2320431.12.peg.1894	2320431.15.peg.1897	65058.241.peg.123
	117	65058.435.peg.186	65058.432.peg.167	2320431.4.peg.641	2320431.3.peg.649	65058.401.peg.638	65058.405.peg.47	65058.406.peg.597	65058.410.peg.640	65058.411.peg.599	65058.370.peg.47	65058.373.peg.47	65058.374.peg.49	65058.375.peg.50	65058.376.peg.636	65058.437.peg.27	65058.385.peg.828	65058.419.peg.47	65058.361.peg.639	65058.362.peg.47	65058.363.peg.643	65058.420.peg.644	65058.421.peg.48	65058.428.peg.49	65058.426.peg.49	65058.313.peg.640	65058.314.peg.1163	65058.315.peg.413	65058.316.peg.642	2320456.3.peg.647	65058.317.peg.637	65058.318.peg.600	65058.319.peg.596	65058.320.peg.49	65058.321.peg.342	65058.322.peg.590	65058.323.peg.597	65058.229.peg.51	2320431.9.peg.1891	2320431.16.peg.1894	2320431.10.peg.1893	2320431.17.peg.1894	2320431.13.peg.1895	2320431.14.peg.1892	2320431.12.peg.1893	2320431.15.peg.1896	65058.241.peg.124
	118	65058.435.peg.187	65058.432.peg.168	2320431.4.peg.640	2320431.3.peg.648	65058.401.peg.637	65058.405.peg.48	65058.406.peg.596	65058.410.peg.639	65058.411.peg.598	65058.370.peg.48	65058.373.peg.48	65058.374.peg.50	65058.375.peg.51	65058.376.peg.635	65058.437.peg.28	65058.385.peg.829	65058.419.peg.48	65058.361.peg.638	65058.362.peg.48	65058.363.peg.642	65058.420.peg.643	65058.421.peg.49	65058.428.peg.50	65058.426.peg.50	65058.313.peg.639	65058.314.peg.1164	65058.315.peg.412	65058.316.peg.641	2320456.3.peg.646	65058.317.peg.636	65058.318.peg.599	65058.319.peg.595	65058.320.peg.50	65058.321.peg.341	65058.322.peg.589	65058.323.peg.596	65058.229.peg.52	2320431.9.peg.1890	2320431.16.peg.1893	2320431.10.peg.1892	2320431.17.peg.1893	2320431.13.peg.1894	2320431.14.peg.1891	2320431.12.peg.1892	2320431.15.peg.1895	65058.241.peg.125
	119	65058.435.peg.188	65058.432.peg.169	2320431.4.peg.639	2320431.3.peg.647	65058.401.peg.636	65058.405.peg.49	65058.406.peg.595	65058.410.peg.638	65058.411.peg.597	65058.370.peg.49	65058.373.peg.49	65058.374.peg.51	65058.375.peg.52	65058.376.peg.634	65058.437.peg.29	65058.385.peg.830	65058.419.peg.49	65058.361.peg.637	65058.362.peg.49	65058.363.peg.641	65058.420.peg.642	65058.421.peg.50	65058.428.peg.51	65058.426.peg.51	65058.313.peg.638	65058.314.peg.1165	65058.315.peg.411	65058.316.peg.640	2320456.3.peg.645	65058.317.peg.635	65058.318.peg.598	65058.319.peg.594	65058.320.peg.51	65058.321.peg.340	65058.322.peg.588	65058.323.peg.595	65058.229.peg.53	2320431.9.peg.1889	2320431.16.peg.1892	2320431.10.peg.1891	2320431.17.peg.1892	2320431.13.peg.1893	2320431.14.peg.1890	2320431.12.peg.1891	2320431.15.peg.1894	65058.241.peg.126
	120	65058.435.peg.189	65058.432.peg.170	2320431.4.peg.638	2320431.3.peg.646	65058.401.peg.635	65058.405.peg.50	65058.406.peg.594	65058.410.peg.637	65058.411.peg.596	65058.370.peg.50	65058.373.peg.50	65058.374.peg.52	65058.375.peg.53	65058.376.peg.633	65058.437.peg.30	65058.385.peg.831	65058.419.peg.50	65058.361.peg.636	65058.362.peg.50	65058.363.peg.640	65058.420.peg.641	65058.421.peg.51	65058.428.peg.52	65058.426.peg.52	65058.313.peg.637	65058.314.peg.1166	65058.315.peg.410	65058.316.peg.639	2320456.3.peg.644	65058.317.peg.634	65058.318.peg.597	65058.319.peg.593	65058.320.peg.52	65058.321.peg.339	65058.322.peg.587	65058.323.peg.594	65058.229.peg.54	2320431.9.peg.1888	2320431.16.peg.1891	2320431.10.peg.1890	2320431.17.peg.1891	2320431.13.peg.1892	2320431.14.peg.1889	2320431.12.peg.1890	2320431.15.peg.1893	65058.241.peg.127
	121	65058.435.peg.190	65058.432.peg.171	2320431.4.peg.637	2320431.3.peg.645	65058.401.peg.634	65058.405.peg.51	65058.406.peg.593	65058.410.peg.636	65058.411.peg.595	65058.370.peg.51	65058.373.peg.51	65058.374.peg.53	65058.375.peg.54	65058.376.peg.632	65058.437.peg.31	65058.385.peg.832	65058.419.peg.51	65058.361.peg.635	65058.362.peg.51	65058.363.peg.639	65058.420.peg.640	65058.421.peg.52	65058.428.peg.53	65058.426.peg.53	65058.313.peg.636	65058.314.peg.1167	65058.315.peg.409	65058.316.peg.638	2320456.3.peg.643	65058.317.peg.633	65058.318.peg.596	65058.319.peg.592	65058.320.peg.53	65058.321.peg.338	65058.322.peg.586	65058.323.peg.593	65058.229.peg.55	2320431.9.peg.1887	2320431.16.peg.1890	2320431.10.peg.1889	2320431.17.peg.1890	2320431.13.peg.1891	2320431.14.peg.1888	2320431.12.peg.1889	2320431.15.peg.1892	65058.241.peg.128
	122	65058.435.peg.191	65058.432.peg.172	2320431.4.peg.636	2320431.3.peg.644	65058.401.peg.633	65058.405.peg.52	65058.406.peg.592	65058.410.peg.635	65058.411.peg.594	65058.370.peg.52	65058.373.peg.52	65058.374.peg.54	65058.375.peg.55	65058.376.peg.631	65058.437.peg.32	65058.385.peg.833	65058.419.peg.52	65058.361.peg.634	65058.362.peg.52	65058.363.peg.638	65058.420.peg.639	65058.421.peg.53	65058.428.peg.54	65058.426.peg.54	65058.313.peg.635	65058.314.peg.1168	65058.315.peg.408	65058.316.peg.637	2320456.3.peg.642	65058.317.peg.632	65058.318.peg.595	65058.319.peg.591	65058.320.peg.54	65058.321.peg.337	65058.322.peg.585	65058.323.peg.592	65058.229.peg.56	2320431.9.peg.1886	2320431.16.peg.1889	2320431.10.peg.1888	2320431.17.peg.1889	2320431.13.peg.1890	2320431.14.peg.1887	2320431.12.peg.1888	2320431.15.peg.1891	65058.241.peg.129
	123	65058.435.peg.192	65058.432.peg.173	2320431.4.peg.635	2320431.3.peg.643	65058.401.peg.631	65058.405.peg.53	65058.406.peg.591	65058.410.peg.634	65058.411.peg.593	65058.370.peg.53	65058.373.peg.53	65058.374.peg.55	65058.375.peg.56	65058.376.peg.630	65058.437.peg.33	65058.385.peg.834	65058.419.peg.53	65058.361.peg.633	65058.362.peg.53	65058.363.peg.637	65058.420.peg.638	65058.421.peg.55	65058.428.peg.55	65058.426.peg.55	65058.313.peg.634	65058.314.peg.1169	65058.315.peg.406	65058.316.peg.636	2320456.3.peg.641	65058.317.peg.631	65058.318.peg.594	65058.319.peg.590	65058.320.peg.55	65058.321.peg.336	65058.322.peg.584	65058.323.peg.591	65058.229.peg.57	2320431.9.peg.1885	2320431.16.peg.1888	2320431.10.peg.1887	2320431.17.peg.1888	2320431.13.peg.1889	2320431.14.peg.1886	2320431.12.peg.1887	2320431.15.peg.1890	65058.241.peg.130
	124	65058.435.peg.193	65058.432.peg.174	2320431.4.peg.634	2320431.3.peg.642	65058.401.peg.630	65058.405.peg.54	65058.406.peg.590	65058.410.peg.633	65058.411.peg.592	65058.370.peg.54	65058.373.peg.54	65058.374.peg.56	65058.375.peg.57	65058.376.peg.629	65058.437.peg.34	65058.385.peg.835	65058.419.peg.54	65058.361.peg.632	65058.362.peg.54	65058.363.peg.636	65058.420.peg.637	65058.421.peg.56	65058.428.peg.56	65058.426.peg.56	65058.313.peg.633	65058.314.peg.1170	65058.315.peg.405	65058.316.peg.635	2320456.3.peg.640	65058.317.peg.630	65058.318.peg.593	65058.319.peg.589	65058.320.peg.56	65058.321.peg.335	65058.322.peg.583	65058.323.peg.590	65058.229.peg.58	2320431.9.peg.1884	2320431.16.peg.1887	2320431.10.peg.1886	2320431.17.peg.1887	2320431.13.peg.1888	2320431.14.peg.1885	2320431.12.peg.1886	2320431.15.peg.1889	65058.241.peg.131
	125	65058.435.peg.194	65058.432.peg.175	2320431.4.peg.633	2320431.3.peg.641	65058.401.peg.629	65058.405.peg.55	65058.406.peg.589	65058.410.peg.632	65058.411.peg.591	65058.370.peg.55	65058.373.peg.55	65058.374.peg.57	65058.375.peg.58	65058.376.peg.628	65058.437.peg.35	65058.385.peg.836	65058.419.peg.55	65058.361.peg.631	65058.362.peg.55	65058.363.peg.635	65058.420.peg.636	65058.421.peg.57	65058.428.peg.57	65058.426.peg.57	65058.313.peg.632	65058.314.peg.1171	65058.315.peg.404	65058.316.peg.634	2320456.3.peg.639	65058.317.peg.629	65058.318.peg.592	65058.319.peg.588	65058.320.peg.57	65058.321.peg.334	65058.322.peg.582	65058.323.peg.589	65058.229.peg.59	2320431.9.peg.1883	2320431.16.peg.1886	2320431.10.peg.1885	2320431.17.peg.1886	2320431.13.peg.1887	2320431.14.peg.1884	2320431.12.peg.1885	2320431.15.peg.1888	65058.241.peg.132
	126	65058.435.peg.195	65058.432.peg.176	2320431.4.peg.632	2320431.3.peg.640	65058.401.peg.628	65058.405.peg.56	65058.406.peg.588	65058.410.peg.631	65058.411.peg.590	65058.370.peg.56	65058.373.peg.56	65058.374.peg.58	65058.375.peg.59	65058.376.peg.627	65058.437.peg.36	65058.385.peg.837	65058.419.peg.56	65058.361.peg.630	65058.362.peg.56	65058.363.peg.634	65058.420.peg.635	65058.421.peg.58	65058.428.peg.58	65058.426.peg.58	65058.313.peg.631	65058.314.peg.1172	65058.315.peg.403	65058.316.peg.633	2320456.3.peg.638	65058.317.peg.628	65058.318.peg.591	65058.319.peg.587	65058.320.peg.58	65058.321.peg.333	65058.322.peg.581	65058.323.peg.588	65058.229.peg.60	2320431.9.peg.1882	2320431.16.peg.1885	2320431.10.peg.1884	2320431.17.peg.1885	2320431.13.peg.1886	2320431.14.peg.1883	2320431.12.peg.1884	2320431.15.peg.1887	65058.241.peg.133
	127	65058.435.peg.196	65058.432.peg.177	2320431.4.peg.631	2320431.3.peg.639	65058.401.peg.627	65058.405.peg.57	65058.406.peg.587	65058.410.peg.630	65058.411.peg.589	65058.370.peg.57	65058.373.peg.57	65058.374.peg.59	65058.375.peg.60	65058.376.peg.626	65058.437.peg.37	65058.385.peg.838	65058.419.peg.57	65058.361.peg.629	65058.362.peg.57	65058.363.peg.633	65058.420.peg.634	65058.421.peg.59	65058.428.peg.59	65058.426.peg.59	65058.313.peg.630	65058.314.peg.1173	65058.315.peg.402	65058.316.peg.632	2320456.3.peg.637	65058.317.peg.627	65058.318.peg.590	65058.319.peg.586	65058.320.peg.59	65058.321.peg.332	65058.322.peg.580	65058.323.peg.587	65058.229.peg.61	2320431.9.peg.1881	2320431.16.peg.1884	2320431.10.peg.1883	2320431.17.peg.1884	2320431.13.peg.1885	2320431.14.peg.1882	2320431.12.peg.1883	2320431.15.peg.1886	65058.241.peg.134
	128	65058.435.peg.197	65058.432.peg.178	2320431.4.peg.630	2320431.3.peg.638	65058.401.peg.626	65058.405.peg.58	65058.406.peg.586	65058.410.peg.629	65058.411.peg.588	65058.370.peg.59	65058.373.peg.59	65058.374.peg.60	65058.375.peg.61	65058.376.peg.625	65058.437.peg.39	65058.385.peg.839	65058.419.peg.58	65058.361.peg.628	65058.362.peg.58	65058.363.peg.631	65058.420.peg.633	65058.421.peg.60	65058.428.peg.60	65058.426.peg.60	65058.313.peg.629	65058.314.peg.1175	65058.315.peg.401	65058.316.peg.631	2320456.3.peg.636	65058.317.peg.626	65058.318.peg.588	65058.319.peg.585	65058.320.peg.61	65058.321.peg.331	65058.322.peg.579	65058.323.peg.586	65058.229.peg.63	2320431.9.peg.1880	2320431.16.peg.1883	2320431.10.peg.1882	2320431.17.peg.1883	2320431.13.peg.1884	2320431.14.peg.1881	2320431.12.peg.1882	2320431.15.peg.1885	65058.241.peg.135
	129	65058.435.peg.198	65058.432.peg.179	2320431.4.peg.629	2320431.3.peg.637	65058.401.peg.625	65058.405.peg.59	65058.406.peg.585	65058.410.peg.628	65058.411.peg.587	65058.370.peg.60	65058.373.peg.60	65058.374.peg.61	65058.375.peg.62	65058.376.peg.624	65058.437.peg.40	65058.385.peg.840	65058.419.peg.59	65058.361.peg.627	65058.362.peg.59	65058.363.peg.630	65058.420.peg.632	65058.421.peg.61	65058.428.peg.61	65058.426.peg.61	65058.313.peg.628	65058.314.peg.1176	65058.315.peg.400	65058.316.peg.630	2320456.3.peg.635	65058.317.peg.625	65058.318.peg.587	65058.319.peg.584	65058.320.peg.62	65058.321.peg.330	65058.322.peg.578	65058.323.peg.585	65058.229.peg.64	2320431.9.peg.1879	2320431.16.peg.1882	2320431.10.peg.1881	2320431.17.peg.1882	2320431.13.peg.1883	2320431.14.peg.1880	2320431.12.peg.1881	2320431.15.peg.1884	65058.241.peg.136
	130	65058.435.peg.200	65058.432.peg.181	2320431.4.peg.627	2320431.3.peg.635	65058.401.peg.624	65058.405.peg.60	65058.406.peg.584	65058.410.peg.627	65058.411.peg.586	65058.370.peg.61	65058.373.peg.61	65058.374.peg.62	65058.375.peg.63	65058.376.peg.623	65058.437.peg.41	65058.385.peg.841	65058.419.peg.60	65058.361.peg.626	65058.362.peg.60	65058.363.peg.629	65058.420.peg.631	65058.421.peg.62	65058.428.peg.62	65058.426.peg.62	65058.313.peg.627	65058.314.peg.1177	65058.315.peg.399	65058.316.peg.629	2320456.3.peg.633	65058.317.peg.624	65058.318.peg.586	65058.319.peg.583	65058.320.peg.63	65058.321.peg.329	65058.322.peg.577	65058.323.peg.584	65058.229.peg.66	2320431.9.peg.1878	2320431.16.peg.1881	2320431.10.peg.1880	2320431.17.peg.1881	2320431.13.peg.1882	2320431.14.peg.1879	2320431.12.peg.1880	2320431.15.peg.1883	65058.241.peg.138
	131	65058.435.peg.201	65058.432.peg.182	2320431.4.peg.626	2320431.3.peg.634	65058.401.peg.623	65058.405.peg.61	65058.406.peg.583	65058.410.peg.626	65058.411.peg.585	65058.370.peg.62	65058.373.peg.62	65058.374.peg.63	65058.375.peg.64	65058.376.peg.622	65058.437.peg.42	65058.385.peg.842	65058.419.peg.61	65058.361.peg.625	65058.362.peg.61	65058.363.peg.628	65058.420.peg.630	65058.421.peg.63	65058.428.peg.63	65058.426.peg.63	65058.313.peg.626	65058.314.peg.1178	65058.315.peg.398	65058.316.peg.628	2320456.3.peg.632	65058.317.peg.623	65058.318.peg.585	65058.319.peg.582	65058.320.peg.64	65058.321.peg.328	65058.322.peg.576	65058.323.peg.583	65058.229.peg.67	2320431.9.peg.1877	2320431.16.peg.1880	2320431.10.peg.1879	2320431.17.peg.1880	2320431.13.peg.1881	2320431.14.peg.1878	2320431.12.peg.1879	2320431.15.peg.1882	65058.241.peg.139
	132	65058.435.peg.202	65058.432.peg.183	2320431.4.peg.625	2320431.3.peg.633	65058.401.peg.622	65058.405.peg.62	65058.406.peg.582	65058.410.peg.625	65058.411.peg.584	65058.370.peg.63	65058.373.peg.63	65058.374.peg.64	65058.375.peg.65	65058.376.peg.621	65058.437.peg.43	65058.385.peg.843	65058.419.peg.62	65058.361.peg.624	65058.362.peg.62	65058.363.peg.627	65058.420.peg.629	65058.421.peg.64	65058.428.peg.64	65058.426.peg.64	65058.313.peg.625	65058.314.peg.1179	65058.315.peg.397	65058.316.peg.627	2320456.3.peg.631	65058.317.peg.622	65058.318.peg.584	65058.319.peg.581	65058.320.peg.65	65058.321.peg.327	65058.322.peg.575	65058.323.peg.582	65058.229.peg.68	2320431.9.peg.1876	2320431.16.peg.1879	2320431.10.peg.1878	2320431.17.peg.1879	2320431.13.peg.1880	2320431.14.peg.1877	2320431.12.peg.1878	2320431.15.peg.1881	65058.241.peg.140
	133	65058.435.peg.203	65058.432.peg.184	2320431.4.peg.624	2320431.3.peg.632	65058.401.peg.621	65058.405.peg.63	65058.406.peg.581	65058.410.peg.624	65058.411.peg.583	65058.370.peg.64	65058.373.peg.64	65058.374.peg.65	65058.375.peg.66	65058.376.peg.620	65058.437.peg.44	65058.385.peg.844	65058.419.peg.63	65058.361.peg.623	65058.362.peg.63	65058.363.peg.626	65058.420.peg.628	65058.421.peg.65	65058.428.peg.65	65058.426.peg.65	65058.313.peg.624	65058.314.peg.1180	65058.315.peg.396	65058.316.peg.626	2320456.3.peg.630	65058.317.peg.621	65058.318.peg.583	65058.319.peg.580	65058.320.peg.66	65058.321.peg.326	65058.322.peg.574	65058.323.peg.581	65058.229.peg.69	2320431.9.peg.1875	2320431.16.peg.1878	2320431.10.peg.1877	2320431.17.peg.1878	2320431.13.peg.1879	2320431.14.peg.1876	2320431.12.peg.1877	2320431.15.peg.1880	65058.241.peg.141
	134	65058.435.peg.204	65058.432.peg.185	2320431.4.peg.623	2320431.3.peg.631	65058.401.peg.620	65058.405.peg.64	65058.406.peg.580	65058.410.peg.623	65058.411.peg.582	65058.370.peg.65	65058.373.peg.65	65058.374.peg.66	65058.375.peg.67	65058.376.peg.619	65058.437.peg.45	65058.385.peg.845	65058.419.peg.64	65058.361.peg.622	65058.362.peg.64	65058.363.peg.625	65058.420.peg.627	65058.421.peg.66	65058.428.peg.66	65058.426.peg.66	65058.313.peg.623	65058.314.peg.1181	65058.315.peg.395	65058.316.peg.625	2320456.3.peg.629	65058.317.peg.620	65058.318.peg.582	65058.319.peg.579	65058.320.peg.67	65058.321.peg.325	65058.322.peg.573	65058.323.peg.580	65058.229.peg.70	2320431.9.peg.1874	2320431.16.peg.1877	2320431.10.peg.1876	2320431.17.peg.1877	2320431.13.peg.1878	2320431.14.peg.1875	2320431.12.peg.1876	2320431.15.peg.1879	65058.241.peg.142
	135	65058.435.peg.205	65058.432.peg.186	2320431.4.peg.622	2320431.3.peg.630	65058.401.peg.619	65058.405.peg.65	65058.406.peg.579	65058.410.peg.622	65058.411.peg.581	65058.370.peg.66	65058.373.peg.66	65058.374.peg.67	65058.375.peg.68	65058.376.peg.618	65058.437.peg.46	65058.385.peg.846	65058.419.peg.65	65058.361.peg.621	65058.362.peg.65	65058.363.peg.624	65058.420.peg.626	65058.421.peg.67	65058.428.peg.67	65058.426.peg.67	65058.313.peg.622	65058.314.peg.1182	65058.315.peg.394	65058.316.peg.624	2320456.3.peg.628	65058.317.peg.619	65058.318.peg.581	65058.319.peg.578	65058.320.peg.68	65058.321.peg.324	65058.322.peg.572	65058.323.peg.579	65058.229.peg.71	2320431.9.peg.1873	2320431.16.peg.1876	2320431.10.peg.1875	2320431.17.peg.1876	2320431.13.peg.1877	2320431.14.peg.1874	2320431.12.peg.1875	2320431.15.peg.1878	65058.241.peg.143
	136	65058.435.peg.206	65058.432.peg.187	2320431.4.peg.621	2320431.3.peg.629	65058.401.peg.618	65058.405.peg.66	65058.406.peg.578	65058.410.peg.621	65058.411.peg.580	65058.370.peg.67	65058.373.peg.67	65058.374.peg.68	65058.375.peg.69	65058.376.peg.617	65058.437.peg.47	65058.385.peg.847	65058.419.peg.66	65058.361.peg.620	65058.362.peg.66	65058.363.peg.623	65058.420.peg.625	65058.421.peg.68	65058.428.peg.68	65058.426.peg.68	65058.313.peg.621	65058.314.peg.1183	65058.315.peg.393	65058.316.peg.623	2320456.3.peg.627	65058.317.peg.618	65058.318.peg.580	65058.319.peg.577	65058.320.peg.69	65058.321.peg.323	65058.322.peg.571	65058.323.peg.578	65058.229.peg.72	2320431.9.peg.1872	2320431.16.peg.1875	2320431.10.peg.1874	2320431.17.peg.1875	2320431.13.peg.1876	2320431.14.peg.1873	2320431.12.peg.1874	2320431.15.peg.1877	65058.241.peg.144
	137	65058.435.peg.207	65058.432.peg.188	2320431.4.peg.620	2320431.3.peg.628	65058.401.peg.617	65058.405.peg.67	65058.406.peg.577	65058.410.peg.620	65058.411.peg.579	65058.370.peg.68	65058.373.peg.68	65058.374.peg.69	65058.375.peg.70	65058.376.peg.616	65058.437.peg.48	65058.385.peg.848	65058.419.peg.67	65058.361.peg.619	65058.362.peg.67	65058.363.peg.622	65058.420.peg.624	65058.421.peg.69	65058.428.peg.69	65058.426.peg.69	65058.313.peg.620	65058.314.peg.1184	65058.315.peg.392	65058.316.peg.622	2320456.3.peg.626	65058.317.peg.617	65058.318.peg.579	65058.319.peg.576	65058.320.peg.70	65058.321.peg.322	65058.322.peg.570	65058.323.peg.577	65058.229.peg.73	2320431.9.peg.1871	2320431.16.peg.1874	2320431.10.peg.1873	2320431.17.peg.1874	2320431.13.peg.1875	2320431.14.peg.1872	2320431.12.peg.1873	2320431.15.peg.1876	65058.241.peg.145
	138	65058.435.peg.208	65058.432.peg.189	2320431.4.peg.619	2320431.3.peg.627	65058.401.peg.616	65058.405.peg.68	65058.406.peg.576	65058.410.peg.619	65058.411.peg.578	65058.370.peg.69	65058.373.peg.69	65058.374.peg.70	65058.375.peg.71	65058.376.peg.615	65058.437.peg.49	65058.385.peg.849	65058.419.peg.68	65058.361.peg.618	65058.362.peg.68	65058.363.peg.621	65058.420.peg.623	65058.421.peg.70	65058.428.peg.70	65058.426.peg.70	65058.313.peg.619	65058.314.peg.1185	65058.315.peg.391	65058.316.peg.621	2320456.3.peg.625	65058.317.peg.616	65058.318.peg.578	65058.319.peg.575	65058.320.peg.71	65058.321.peg.321	65058.322.peg.569	65058.323.peg.576	65058.229.peg.74	2320431.9.peg.1870	2320431.16.peg.1873	2320431.10.peg.1872	2320431.17.peg.1873	2320431.13.peg.1874	2320431.14.peg.1871	2320431.12.peg.1872	2320431.15.peg.1875	65058.241.peg.146
	139	65058.435.peg.209	65058.432.peg.190	2320431.4.peg.618	2320431.3.peg.626	65058.401.peg.615	65058.405.peg.69	65058.406.peg.575	65058.410.peg.618	65058.411.peg.577	65058.370.peg.70	65058.373.peg.70	65058.374.peg.71	65058.375.peg.72	65058.376.peg.614	65058.437.peg.50	65058.385.peg.850	65058.419.peg.69	65058.361.peg.617	65058.362.peg.69	65058.363.peg.620	65058.420.peg.622	65058.421.peg.71	65058.428.peg.71	65058.426.peg.71	65058.313.peg.618	65058.314.peg.1186	65058.315.peg.390	65058.316.peg.620	2320456.3.peg.624	65058.317.peg.615	65058.318.peg.577	65058.319.peg.574	65058.320.peg.72	65058.321.peg.320	65058.322.peg.567	65058.323.peg.575	65058.229.peg.75	2320431.9.peg.1869	2320431.16.peg.1872	2320431.10.peg.1871	2320431.17.peg.1872	2320431.13.peg.1873	2320431.14.peg.1870	2320431.12.peg.1871	2320431.15.peg.1874	65058.241.peg.147
	140	65058.435.peg.210	65058.432.peg.191	2320431.4.peg.617	2320431.3.peg.625	65058.401.peg.614	65058.405.peg.70	65058.406.peg.574	65058.410.peg.617	65058.411.peg.576	65058.370.peg.71	65058.373.peg.71	65058.374.peg.72	65058.375.peg.73	65058.376.peg.613	65058.437.peg.51	65058.385.peg.851	65058.419.peg.70	65058.361.peg.616	65058.362.peg.70	65058.363.peg.619	65058.420.peg.621	65058.421.peg.72	65058.428.peg.72	65058.426.peg.72	65058.313.peg.617	65058.314.peg.1187	65058.315.peg.389	65058.316.peg.619	2320456.3.peg.623	65058.317.peg.614	65058.318.peg.576	65058.319.peg.573	65058.320.peg.73	65058.321.peg.319	65058.322.peg.566	65058.323.peg.574	65058.229.peg.76	2320431.9.peg.1868	2320431.16.peg.1871	2320431.10.peg.1870	2320431.17.peg.1871	2320431.13.peg.1872	2320431.14.peg.1869	2320431.12.peg.1870	2320431.15.peg.1873	65058.241.peg.148
	141	65058.435.peg.211	65058.432.peg.192	2320431.4.peg.616	2320431.3.peg.624	65058.401.peg.613	65058.405.peg.71	65058.406.peg.573	65058.410.peg.616	65058.411.peg.575	65058.370.peg.72	65058.373.peg.72	65058.374.peg.73	65058.375.peg.74	65058.376.peg.612	65058.437.peg.52	65058.385.peg.852	65058.419.peg.71	65058.361.peg.615	65058.362.peg.71	65058.363.peg.618	65058.420.peg.620	65058.421.peg.73	65058.428.peg.73	65058.426.peg.73	65058.313.peg.616	65058.314.peg.1188	65058.315.peg.388	65058.316.peg.618	2320456.3.peg.622	65058.317.peg.613	65058.318.peg.575	65058.319.peg.572	65058.320.peg.74	65058.321.peg.318	65058.322.peg.565	65058.323.peg.573	65058.229.peg.77	2320431.9.peg.1867	2320431.16.peg.1870	2320431.10.peg.1869	2320431.17.peg.1870	2320431.13.peg.1871	2320431.14.peg.1868	2320431.12.peg.1869	2320431.15.peg.1872	65058.241.peg.149
	142	65058.435.peg.212	65058.432.peg.193	2320431.4.peg.615	2320431.3.peg.623	65058.401.peg.612	65058.405.peg.72	65058.406.peg.572	65058.410.peg.615	65058.411.peg.574	65058.370.peg.73	65058.373.peg.73	65058.374.peg.74	65058.375.peg.75	65058.376.peg.611	65058.437.peg.53	65058.385.peg.853	65058.419.peg.72	65058.361.peg.614	65058.362.peg.72	65058.363.peg.617	65058.420.peg.619	65058.421.peg.74	65058.428.peg.74	65058.426.peg.74	65058.313.peg.615	65058.314.peg.1189	65058.315.peg.387	65058.316.peg.617	2320456.3.peg.621	65058.317.peg.612	65058.318.peg.574	65058.319.peg.571	65058.320.peg.75	65058.321.peg.317	65058.322.peg.564	65058.323.peg.572	65058.229.peg.78	2320431.9.peg.1866	2320431.16.peg.1869	2320431.10.peg.1868	2320431.17.peg.1869	2320431.13.peg.1870	2320431.14.peg.1867	2320431.12.peg.1868	2320431.15.peg.1871	65058.241.peg.150
	143	65058.435.peg.213	65058.432.peg.194	2320431.4.peg.614	2320431.3.peg.622	65058.401.peg.611	65058.405.peg.73	65058.406.peg.571	65058.410.peg.614	65058.411.peg.573	65058.370.peg.74	65058.373.peg.74	65058.374.peg.75	65058.375.peg.76	65058.376.peg.610	65058.437.peg.54	65058.385.peg.854	65058.419.peg.73	65058.361.peg.613	65058.362.peg.73	65058.363.peg.616	65058.420.peg.618	65058.421.peg.75	65058.428.peg.75	65058.426.peg.75	65058.313.peg.614	65058.314.peg.1190	65058.315.peg.386	65058.316.peg.616	2320456.3.peg.620	65058.317.peg.611	65058.318.peg.573	65058.319.peg.570	65058.320.peg.76	65058.321.peg.316	65058.322.peg.563	65058.323.peg.571	65058.229.peg.79	2320431.9.peg.1865	2320431.16.peg.1868	2320431.10.peg.1867	2320431.17.peg.1868	2320431.13.peg.1869	2320431.14.peg.1866	2320431.12.peg.1867	2320431.15.peg.1870	65058.241.peg.151
	144	65058.435.peg.214	65058.432.peg.195	2320431.4.peg.613	2320431.3.peg.621	65058.401.peg.610	65058.405.peg.74	65058.406.peg.570	65058.410.peg.613	65058.411.peg.572	65058.370.peg.75	65058.373.peg.75	65058.374.peg.76	65058.375.peg.77	65058.376.peg.609	65058.437.peg.55	65058.385.peg.855	65058.419.peg.74	65058.361.peg.612	65058.362.peg.74	65058.363.peg.615	65058.420.peg.617	65058.421.peg.76	65058.428.peg.76	65058.426.peg.76	65058.313.peg.613	65058.314.peg.1191	65058.315.peg.385	65058.316.peg.615	2320456.3.peg.619	65058.317.peg.610	65058.318.peg.572	65058.319.peg.569	65058.320.peg.77	65058.321.peg.315	65058.322.peg.562	65058.323.peg.570	65058.229.peg.80	2320431.9.peg.1864	2320431.16.peg.1867	2320431.10.peg.1866	2320431.17.peg.1867	2320431.13.peg.1868	2320431.14.peg.1865	2320431.12.peg.1866	2320431.15.peg.1869	65058.241.peg.152
	145	65058.435.peg.215	65058.432.peg.196	2320431.4.peg.612	2320431.3.peg.620	65058.401.peg.609	65058.405.peg.75	65058.406.peg.569	65058.410.peg.612	65058.411.peg.571	65058.370.peg.76	65058.373.peg.76	65058.374.peg.77	65058.375.peg.78	65058.376.peg.608	65058.437.peg.56	65058.385.peg.856	65058.419.peg.75	65058.361.peg.611	65058.362.peg.75	65058.363.peg.614	65058.420.peg.616	65058.421.peg.77	65058.428.peg.77	65058.426.peg.77	65058.313.peg.612	65058.314.peg.1192	65058.315.peg.384	65058.316.peg.614	2320456.3.peg.618	65058.317.peg.609	65058.318.peg.571	65058.319.peg.568	65058.320.peg.78	65058.321.peg.314	65058.322.peg.561	65058.323.peg.569	65058.229.peg.81	2320431.9.peg.1863	2320431.16.peg.1866	2320431.10.peg.1865	2320431.17.peg.1866	2320431.13.peg.1867	2320431.14.peg.1864	2320431.12.peg.1865	2320431.15.peg.1868	65058.241.peg.153
	146	65058.435.peg.216	65058.432.peg.197	2320431.4.peg.611	2320431.3.peg.619	65058.401.peg.608	65058.405.peg.76	65058.406.peg.568	65058.410.peg.611	65058.411.peg.570	65058.370.peg.77	65058.373.peg.77	65058.374.peg.78	65058.375.peg.79	65058.376.peg.607	65058.437.peg.57	65058.385.peg.857	65058.419.peg.76	65058.361.peg.610	65058.362.peg.76	65058.363.peg.613	65058.420.peg.615	65058.421.peg.78	65058.428.peg.78	65058.426.peg.78	65058.313.peg.611	65058.314.peg.1193	65058.315.peg.383	65058.316.peg.613	2320456.3.peg.617	65058.317.peg.608	65058.318.peg.570	65058.319.peg.567	65058.320.peg.79	65058.321.peg.313	65058.322.peg.560	65058.323.peg.568	65058.229.peg.82	2320431.9.peg.1862	2320431.16.peg.1865	2320431.10.peg.1864	2320431.17.peg.1865	2320431.13.peg.1866	2320431.14.peg.1863	2320431.12.peg.1864	2320431.15.peg.1867	65058.241.peg.154
	147	65058.435.peg.217	65058.432.peg.198	2320431.4.peg.610	2320431.3.peg.618	65058.401.peg.607	65058.405.peg.77	65058.406.peg.567	65058.410.peg.610	65058.411.peg.569	65058.370.peg.78	65058.373.peg.78	65058.374.peg.79	65058.375.peg.80	65058.376.peg.606	65058.437.peg.58	65058.385.peg.858	65058.419.peg.77	65058.361.peg.609	65058.362.peg.77	65058.363.peg.612	65058.420.peg.614	65058.421.peg.79	65058.428.peg.79	65058.426.peg.79	65058.313.peg.610	65058.314.peg.1194	65058.315.peg.382	65058.316.peg.612	2320456.3.peg.616	65058.317.peg.607	65058.318.peg.569	65058.319.peg.566	65058.320.peg.80	65058.321.peg.312	65058.322.peg.559	65058.323.peg.567	65058.229.peg.83	2320431.9.peg.1861	2320431.16.peg.1864	2320431.10.peg.1863	2320431.17.peg.1864	2320431.13.peg.1865	2320431.14.peg.1862	2320431.12.peg.1863	2320431.15.peg.1866	65058.241.peg.155
	148	65058.435.peg.218	65058.432.peg.199	2320431.4.peg.609	2320431.3.peg.617	65058.401.peg.606	65058.405.peg.78	65058.406.peg.566	65058.410.peg.609	65058.411.peg.568	65058.370.peg.79	65058.373.peg.79	65058.374.peg.80	65058.375.peg.81	65058.376.peg.605	65058.437.peg.59	65058.385.peg.859	65058.419.peg.78	65058.361.peg.608	65058.362.peg.78	65058.363.peg.611	65058.420.peg.613	65058.421.peg.80	65058.428.peg.80	65058.426.peg.80	65058.313.peg.609	65058.314.peg.1195	65058.315.peg.381	65058.316.peg.611	2320456.3.peg.615	65058.317.peg.606	65058.318.peg.568	65058.319.peg.565	65058.320.peg.81	65058.321.peg.311	65058.322.peg.558	65058.323.peg.566	65058.229.peg.84	2320431.9.peg.1860	2320431.16.peg.1863	2320431.10.peg.1862	2320431.17.peg.1863	2320431.13.peg.1864	2320431.14.peg.1861	2320431.12.peg.1862	2320431.15.peg.1865	65058.241.peg.156
	149	65058.435.peg.219	65058.432.peg.200	2320431.4.peg.608	2320431.3.peg.616	65058.401.peg.605	65058.405.peg.79	65058.406.peg.565	65058.410.peg.608	65058.411.peg.567	65058.370.peg.80	65058.373.peg.80	65058.374.peg.81	65058.375.peg.82	65058.376.peg.604	65058.437.peg.60	65058.385.peg.860	65058.419.peg.79	65058.361.peg.607	65058.362.peg.79	65058.363.peg.610	65058.420.peg.612	65058.421.peg.81	65058.428.peg.81	65058.426.peg.81	65058.313.peg.608	65058.314.peg.1196	65058.315.peg.380	65058.316.peg.610	2320456.3.peg.614	65058.317.peg.605	65058.318.peg.567	65058.319.peg.564	65058.320.peg.82	65058.321.peg.310	65058.322.peg.557	65058.323.peg.565	65058.229.peg.85	2320431.9.peg.1859	2320431.16.peg.1862	2320431.10.peg.1861	2320431.17.peg.1862	2320431.13.peg.1863	2320431.14.peg.1860	2320431.12.peg.1861	2320431.15.peg.1864	65058.241.peg.157
	150	65058.435.peg.220	65058.432.peg.201	2320431.4.peg.607	2320431.3.peg.615	65058.401.peg.604	65058.405.peg.80	65058.406.peg.564	65058.410.peg.607	65058.411.peg.566	65058.370.peg.81	65058.373.peg.81	65058.374.peg.82	65058.375.peg.83	65058.376.peg.603	65058.437.peg.61	65058.385.peg.861	65058.419.peg.80	65058.361.peg.606	65058.362.peg.80	65058.363.peg.609	65058.420.peg.611	65058.421.peg.82	65058.428.peg.82	65058.426.peg.82	65058.313.peg.607	65058.314.peg.1197	65058.315.peg.379	65058.316.peg.609	2320456.3.peg.613	65058.317.peg.604	65058.318.peg.566	65058.319.peg.563	65058.320.peg.83	65058.321.peg.309	65058.322.peg.556	65058.323.peg.564	65058.229.peg.86	2320431.9.peg.1858	2320431.16.peg.1861	2320431.10.peg.1860	2320431.17.peg.1861	2320431.13.peg.1862	2320431.14.peg.1859	2320431.12.peg.1860	2320431.15.peg.1863	65058.241.peg.158
	151	65058.435.peg.221	65058.432.peg.202	2320431.4.peg.606	2320431.3.peg.614	65058.401.peg.603	65058.405.peg.81	65058.406.peg.563	65058.410.peg.606	65058.411.peg.565	65058.370.peg.82	65058.373.peg.82	65058.374.peg.83	65058.375.peg.84	65058.376.peg.602	65058.437.peg.62	65058.385.peg.862	65058.419.peg.81	65058.361.peg.605	65058.362.peg.81	65058.363.peg.608	65058.420.peg.610	65058.421.peg.83	65058.428.peg.83	65058.426.peg.83	65058.313.peg.606	65058.314.peg.1198	65058.315.peg.378	65058.316.peg.608	2320456.3.peg.612	65058.317.peg.603	65058.318.peg.565	65058.319.peg.562	65058.320.peg.84	65058.321.peg.308	65058.322.peg.555	65058.323.peg.563	65058.229.peg.87	2320431.9.peg.1857	2320431.16.peg.1860	2320431.10.peg.1859	2320431.17.peg.1860	2320431.13.peg.1861	2320431.14.peg.1858	2320431.12.peg.1859	2320431.15.peg.1862	65058.241.peg.159
	152	65058.435.peg.222	65058.432.peg.203	2320431.4.peg.605	2320431.3.peg.613	65058.401.peg.602	65058.405.peg.82	65058.406.peg.562	65058.410.peg.605	65058.411.peg.564	65058.370.peg.83	65058.373.peg.83	65058.374.peg.84	65058.375.peg.85	65058.376.peg.601	65058.437.peg.63	65058.385.peg.863	65058.419.peg.82	65058.361.peg.604	65058.362.peg.82	65058.363.peg.607	65058.420.peg.609	65058.421.peg.84	65058.428.peg.84	65058.426.peg.84	65058.313.peg.605	65058.314.peg.1199	65058.315.peg.377	65058.316.peg.607	2320456.3.peg.611	65058.317.peg.602	65058.318.peg.564	65058.319.peg.561	65058.320.peg.85	65058.321.peg.307	65058.322.peg.554	65058.323.peg.562	65058.229.peg.88	2320431.9.peg.1856	2320431.16.peg.1859	2320431.10.peg.1858	2320431.17.peg.1859	2320431.13.peg.1860	2320431.14.peg.1857	2320431.12.peg.1858	2320431.15.peg.1861	65058.241.peg.160
	153	65058.435.peg.223	65058.432.peg.204	2320431.4.peg.604	2320431.3.peg.612	65058.401.peg.601	65058.405.peg.83	65058.406.peg.561	65058.410.peg.604	65058.411.peg.563	65058.370.peg.84	65058.373.peg.84	65058.374.peg.85	65058.375.peg.86	65058.376.peg.600	65058.437.peg.64	65058.385.peg.864	65058.419.peg.83	65058.361.peg.603	65058.362.peg.83	65058.363.peg.606	65058.420.peg.608	65058.421.peg.85	65058.428.peg.85	65058.426.peg.85	65058.313.peg.604	65058.314.peg.1200	65058.315.peg.376	65058.316.peg.606	2320456.3.peg.610	65058.317.peg.601	65058.318.peg.563	65058.319.peg.560	65058.320.peg.86	65058.321.peg.306	65058.322.peg.553	65058.323.peg.561	65058.229.peg.89	2320431.9.peg.1855	2320431.16.peg.1858	2320431.10.peg.1857	2320431.17.peg.1858	2320431.13.peg.1859	2320431.14.peg.1856	2320431.12.peg.1857	2320431.15.peg.1860	65058.241.peg.161
	154	65058.435.peg.224	65058.432.peg.205	2320431.4.peg.603	2320431.3.peg.611	65058.401.peg.600	65058.405.peg.84	65058.406.peg.560	65058.410.peg.603	65058.411.peg.562	65058.370.peg.85	65058.373.peg.85	65058.374.peg.86	65058.375.peg.87	65058.376.peg.599	65058.437.peg.65	65058.385.peg.865	65058.419.peg.84	65058.361.peg.602	65058.362.peg.84	65058.363.peg.605	65058.420.peg.607	65058.421.peg.86	65058.428.peg.86	65058.426.peg.86	65058.313.peg.603	65058.314.peg.1201	65058.315.peg.375	65058.316.peg.605	2320456.3.peg.609	65058.317.peg.600	65058.318.peg.562	65058.319.peg.559	65058.320.peg.87	65058.321.peg.305	65058.322.peg.552	65058.323.peg.560	65058.229.peg.90	2320431.9.peg.1854	2320431.16.peg.1857	2320431.10.peg.1856	2320431.17.peg.1857	2320431.13.peg.1858	2320431.14.peg.1855	2320431.12.peg.1856	2320431.15.peg.1859	65058.241.peg.162
	155	65058.435.peg.225	65058.432.peg.206	2320431.4.peg.602	2320431.3.peg.610	65058.401.peg.599	65058.405.peg.85	65058.406.peg.559	65058.410.peg.602	65058.411.peg.561	65058.370.peg.86	65058.373.peg.86	65058.374.peg.87	65058.375.peg.88	65058.376.peg.598	65058.437.peg.66	65058.385.peg.866	65058.419.peg.85	65058.361.peg.601	65058.362.peg.85	65058.363.peg.604	65058.420.peg.606	65058.421.peg.87	65058.428.peg.87	65058.426.peg.87	65058.313.peg.602	65058.314.peg.1202	65058.315.peg.374	65058.316.peg.604	2320456.3.peg.608	65058.317.peg.599	65058.318.peg.561	65058.319.peg.558	65058.320.peg.88	65058.321.peg.304	65058.322.peg.551	65058.323.peg.559	65058.229.peg.91	2320431.9.peg.1853	2320431.16.peg.1856	2320431.10.peg.1855	2320431.17.peg.1856	2320431.13.peg.1857	2320431.14.peg.1854	2320431.12.peg.1855	2320431.15.peg.1858	65058.241.peg.163
	156	65058.435.peg.226	65058.432.peg.207	2320431.4.peg.601	2320431.3.peg.609	65058.401.peg.598	65058.405.peg.86	65058.406.peg.558	65058.410.peg.601	65058.411.peg.560	65058.370.peg.87	65058.373.peg.87	65058.374.peg.88	65058.375.peg.89	65058.376.peg.597	65058.437.peg.67	65058.385.peg.867	65058.419.peg.86	65058.361.peg.600	65058.362.peg.86	65058.363.peg.603	65058.420.peg.605	65058.421.peg.88	65058.428.peg.88	65058.426.peg.88	65058.313.peg.601	65058.314.peg.1203	65058.315.peg.373	65058.316.peg.603	2320456.3.peg.607	65058.317.peg.598	65058.318.peg.560	65058.319.peg.557	65058.320.peg.89	65058.321.peg.303	65058.322.peg.550	65058.323.peg.558	65058.229.peg.92	2320431.9.peg.1852	2320431.16.peg.1855	2320431.10.peg.1854	2320431.17.peg.1855	2320431.13.peg.1856	2320431.14.peg.1853	2320431.12.peg.1854	2320431.15.peg.1857	65058.241.peg.164
	157	65058.435.peg.227	65058.432.peg.208	2320431.4.peg.600	2320431.3.peg.608	65058.401.peg.597	65058.405.peg.87	65058.406.peg.557	65058.410.peg.600	65058.411.peg.559	65058.370.peg.88	65058.373.peg.88	65058.374.peg.89	65058.375.peg.90	65058.376.peg.596	65058.437.peg.68	65058.385.peg.868	65058.419.peg.87	65058.361.peg.599	65058.362.peg.87	65058.363.peg.602	65058.420.peg.604	65058.421.peg.89	65058.428.peg.89	65058.426.peg.89	65058.313.peg.600	65058.314.peg.1204	65058.315.peg.372	65058.316.peg.602	2320456.3.peg.606	65058.317.peg.597	65058.318.peg.559	65058.319.peg.556	65058.320.peg.90	65058.321.peg.302	65058.322.peg.549	65058.323.peg.557	65058.229.peg.93	2320431.9.peg.1851	2320431.16.peg.1854	2320431.10.peg.1853	2320431.17.peg.1854	2320431.13.peg.1855	2320431.14.peg.1852	2320431.12.peg.1853	2320431.15.peg.1856	65058.241.peg.165
	158	65058.435.peg.228	65058.432.peg.209	2320431.4.peg.599	2320431.3.peg.607	65058.401.peg.596	65058.405.peg.88	65058.406.peg.556	65058.410.peg.599	65058.411.peg.558	65058.370.peg.89	65058.373.peg.89	65058.374.peg.90	65058.375.peg.91	65058.376.peg.595	65058.437.peg.69	65058.385.peg.869	65058.419.peg.88	65058.361.peg.598	65058.362.peg.88	65058.363.peg.601	65058.420.peg.603	65058.421.peg.90	65058.428.peg.90	65058.426.peg.90	65058.313.peg.599	65058.314.peg.1205	65058.315.peg.371	65058.316.peg.601	2320456.3.peg.605	65058.317.peg.596	65058.318.peg.558	65058.319.peg.555	65058.320.peg.91	65058.321.peg.301	65058.322.peg.548	65058.323.peg.556	65058.229.peg.94	2320431.9.peg.1850	2320431.16.peg.1853	2320431.10.peg.1852	2320431.17.peg.1853	2320431.13.peg.1854	2320431.14.peg.1851	2320431.12.peg.1852	2320431.15.peg.1855	65058.241.peg.166
	159	65058.435.peg.229	65058.432.peg.210	2320431.4.peg.598	2320431.3.peg.606	65058.401.peg.595	65058.405.peg.89	65058.406.peg.555	65058.410.peg.598	65058.411.peg.557	65058.370.peg.90	65058.373.peg.90	65058.374.peg.91	65058.375.peg.92	65058.376.peg.594	65058.437.peg.70	65058.385.peg.870	65058.419.peg.89	65058.361.peg.597	65058.362.peg.89	65058.363.peg.600	65058.420.peg.602	65058.421.peg.91	65058.428.peg.91	65058.426.peg.91	65058.313.peg.598	65058.314.peg.1206	65058.315.peg.370	65058.316.peg.600	2320456.3.peg.604	65058.317.peg.595	65058.318.peg.557	65058.319.peg.554	65058.320.peg.92	65058.321.peg.300	65058.322.peg.547	65058.323.peg.555	65058.229.peg.95	2320431.9.peg.1849	2320431.16.peg.1852	2320431.10.peg.1851	2320431.17.peg.1852	2320431.13.peg.1853	2320431.14.peg.1850	2320431.12.peg.1851	2320431.15.peg.1854	65058.241.peg.167
	160	65058.435.peg.230	65058.432.peg.211	2320431.4.peg.597	2320431.3.peg.605	65058.401.peg.594	65058.405.peg.90	65058.406.peg.554	65058.410.peg.597	65058.411.peg.556	65058.370.peg.91	65058.373.peg.91	65058.374.peg.92	65058.375.peg.93	65058.376.peg.593	65058.437.peg.71	65058.385.peg.871	65058.419.peg.90	65058.361.peg.596	65058.362.peg.90	65058.363.peg.599	65058.420.peg.601	65058.421.peg.92	65058.428.peg.92	65058.426.peg.92	65058.313.peg.597	65058.314.peg.1207	65058.315.peg.369	65058.316.peg.599	2320456.3.peg.603	65058.317.peg.594	65058.318.peg.556	65058.319.peg.553	65058.320.peg.93	65058.321.peg.299	65058.322.peg.546	65058.323.peg.554	65058.229.peg.96	2320431.9.peg.1848	2320431.16.peg.1851	2320431.10.peg.1850	2320431.17.peg.1851	2320431.13.peg.1852	2320431.14.peg.1849	2320431.12.peg.1850	2320431.15.peg.1853	65058.241.peg.168
	161	65058.435.peg.231	65058.432.peg.212	2320431.4.peg.596	2320431.3.peg.604	65058.401.peg.593	65058.405.peg.91	65058.406.peg.553	65058.410.peg.596	65058.411.peg.555	65058.370.peg.92	65058.373.peg.92	65058.374.peg.93	65058.375.peg.94	65058.376.peg.592	65058.437.peg.72	65058.385.peg.872	65058.419.peg.91	65058.361.peg.595	65058.362.peg.91	65058.363.peg.598	65058.420.peg.600	65058.421.peg.93	65058.428.peg.93	65058.426.peg.93	65058.313.peg.596	65058.314.peg.1208	65058.315.peg.368	65058.316.peg.598	2320456.3.peg.602	65058.317.peg.593	65058.318.peg.555	65058.319.peg.552	65058.320.peg.94	65058.321.peg.298	65058.322.peg.545	65058.323.peg.553	65058.229.peg.97	2320431.9.peg.1847	2320431.16.peg.1850	2320431.10.peg.1849	2320431.17.peg.1850	2320431.13.peg.1851	2320431.14.peg.1848	2320431.12.peg.1849	2320431.15.peg.1852	65058.241.peg.169
	162	65058.435.peg.232	65058.432.peg.213	2320431.4.peg.595	2320431.3.peg.603	65058.401.peg.592	65058.405.peg.92	65058.406.peg.552	65058.410.peg.595	65058.411.peg.554	65058.370.peg.93	65058.373.peg.93	65058.374.peg.94	65058.375.peg.95	65058.376.peg.591	65058.437.peg.73	65058.385.peg.873	65058.419.peg.92	65058.361.peg.594	65058.362.peg.92	65058.363.peg.597	65058.420.peg.599	65058.421.peg.94	65058.428.peg.94	65058.426.peg.94	65058.313.peg.595	65058.314.peg.1209	65058.315.peg.367	65058.316.peg.597	2320456.3.peg.601	65058.317.peg.592	65058.318.peg.554	65058.319.peg.551	65058.320.peg.95	65058.321.peg.297	65058.322.peg.544	65058.323.peg.552	65058.229.peg.98	2320431.9.peg.1846	2320431.16.peg.1849	2320431.10.peg.1848	2320431.17.peg.1849	2320431.13.peg.1850	2320431.14.peg.1847	2320431.12.peg.1848	2320431.15.peg.1851	65058.241.peg.170
	163	65058.435.peg.233	65058.432.peg.214	2320431.4.peg.594	2320431.3.peg.602	65058.401.peg.591	65058.405.peg.93	65058.406.peg.551	65058.410.peg.594	65058.411.peg.553	65058.370.peg.94	65058.373.peg.94	65058.374.peg.95	65058.375.peg.96	65058.376.peg.590	65058.437.peg.74	65058.385.peg.874	65058.419.peg.93	65058.361.peg.593	65058.362.peg.93	65058.363.peg.596	65058.420.peg.598	65058.421.peg.95	65058.428.peg.95	65058.426.peg.95	65058.313.peg.594	65058.314.peg.1210	65058.315.peg.366	65058.316.peg.596	2320456.3.peg.600	65058.317.peg.591	65058.318.peg.553	65058.319.peg.550	65058.320.peg.96	65058.321.peg.296	65058.322.peg.543	65058.323.peg.551	65058.229.peg.99	2320431.9.peg.1845	2320431.16.peg.1848	2320431.10.peg.1847	2320431.17.peg.1848	2320431.13.peg.1849	2320431.14.peg.1846	2320431.12.peg.1847	2320431.15.peg.1850	65058.241.peg.171
	164	65058.435.peg.234	65058.432.peg.215	2320431.4.peg.593	2320431.3.peg.601	65058.401.peg.590	65058.405.peg.94	65058.406.peg.550	65058.410.peg.593	65058.411.peg.552	65058.370.peg.95	65058.373.peg.95	65058.374.peg.96	65058.375.peg.97	65058.376.peg.589	65058.437.peg.75	65058.385.peg.875	65058.419.peg.94	65058.361.peg.592	65058.362.peg.94	65058.363.peg.595	65058.420.peg.597	65058.421.peg.96	65058.428.peg.96	65058.426.peg.96	65058.313.peg.593	65058.314.peg.1211	65058.315.peg.365	65058.316.peg.595	2320456.3.peg.599	65058.317.peg.590	65058.318.peg.552	65058.319.peg.549	65058.320.peg.97	65058.321.peg.295	65058.322.peg.542	65058.323.peg.550	65058.229.peg.100	2320431.9.peg.1844	2320431.16.peg.1847	2320431.10.peg.1846	2320431.17.peg.1847	2320431.13.peg.1848	2320431.14.peg.1845	2320431.12.peg.1846	2320431.15.peg.1849	65058.241.peg.172
	165	65058.435.peg.235	65058.432.peg.216	2320431.4.peg.592	2320431.3.peg.600	65058.401.peg.589	65058.405.peg.95	65058.406.peg.549	65058.410.peg.592	65058.411.peg.551	65058.370.peg.96	65058.373.peg.96	65058.374.peg.97	65058.375.peg.98	65058.376.peg.588	65058.437.peg.76	65058.385.peg.876	65058.419.peg.95	65058.361.peg.591	65058.362.peg.95	65058.363.peg.594	65058.420.peg.596	65058.421.peg.97	65058.428.peg.97	65058.426.peg.97	65058.313.peg.592	65058.314.peg.1212	65058.315.peg.364	65058.316.peg.594	2320456.3.peg.598	65058.317.peg.589	65058.318.peg.551	65058.319.peg.548	65058.320.peg.98	65058.321.peg.294	65058.322.peg.541	65058.323.peg.549	65058.229.peg.101	2320431.9.peg.1843	2320431.16.peg.1846	2320431.10.peg.1845	2320431.17.peg.1846	2320431.13.peg.1847	2320431.14.peg.1844	2320431.12.peg.1845	2320431.15.peg.1848	65058.241.peg.173
	166	65058.435.peg.236	65058.432.peg.217	2320431.4.peg.591	2320431.3.peg.599	65058.401.peg.588	65058.405.peg.96	65058.406.peg.548	65058.410.peg.591	65058.411.peg.550	65058.370.peg.97	65058.373.peg.97	65058.374.peg.98	65058.375.peg.99	65058.376.peg.587	65058.437.peg.77	65058.385.peg.877	65058.419.peg.96	65058.361.peg.590	65058.362.peg.96	65058.363.peg.593	65058.420.peg.595	65058.421.peg.98	65058.428.peg.98	65058.426.peg.98	65058.313.peg.591	65058.314.peg.1213	65058.315.peg.363	65058.316.peg.593	2320456.3.peg.597	65058.317.peg.588	65058.318.peg.550	65058.319.peg.547	65058.320.peg.99	65058.321.peg.293	65058.322.peg.540	65058.323.peg.548	65058.229.peg.102	2320431.9.peg.1842	2320431.16.peg.1845	2320431.10.peg.1844	2320431.17.peg.1845	2320431.13.peg.1846	2320431.14.peg.1843	2320431.12.peg.1844	2320431.15.peg.1847	65058.241.peg.174
	167	65058.435.peg.237	65058.432.peg.218	2320431.4.peg.590	2320431.3.peg.598	65058.401.peg.587	65058.405.peg.97	65058.406.peg.547	65058.410.peg.590	65058.411.peg.549	65058.370.peg.98	65058.373.peg.98	65058.374.peg.99	65058.375.peg.100	65058.376.peg.586	65058.437.peg.78	65058.385.peg.878	65058.419.peg.97	65058.361.peg.589	65058.362.peg.97	65058.363.peg.592	65058.420.peg.594	65058.421.peg.99	65058.428.peg.99	65058.426.peg.99	65058.313.peg.590	65058.314.peg.1214	65058.315.peg.362	65058.316.peg.592	2320456.3.peg.596	65058.317.peg.587	65058.318.peg.549	65058.319.peg.546	65058.320.peg.100	65058.321.peg.292	65058.322.peg.539	65058.323.peg.547	65058.229.peg.103	2320431.9.peg.1841	2320431.16.peg.1844	2320431.10.peg.1843	2320431.17.peg.1844	2320431.13.peg.1845	2320431.14.peg.1842	2320431.12.peg.1843	2320431.15.peg.1846	65058.241.peg.175
	168	65058.435.peg.238	65058.432.peg.219	2320431.4.peg.589	2320431.3.peg.597	65058.401.peg.586	65058.405.peg.98	65058.406.peg.546	65058.410.peg.589	65058.411.peg.548	65058.370.peg.99	65058.373.peg.99	65058.374.peg.100	65058.375.peg.101	65058.376.peg.585	65058.437.peg.79	65058.385.peg.879	65058.419.peg.98	65058.361.peg.588	65058.362.peg.98	65058.363.peg.591	65058.420.peg.593	65058.421.peg.100	65058.428.peg.100	65058.426.peg.100	65058.313.peg.589	65058.314.peg.1215	65058.315.peg.361	65058.316.peg.591	2320456.3.peg.595	65058.317.peg.586	65058.318.peg.548	65058.319.peg.545	65058.320.peg.101	65058.321.peg.291	65058.322.peg.538	65058.323.peg.546	65058.229.peg.104	2320431.9.peg.1840	2320431.16.peg.1843	2320431.10.peg.1842	2320431.17.peg.1843	2320431.13.peg.1844	2320431.14.peg.1841	2320431.12.peg.1842	2320431.15.peg.1845	65058.241.peg.176
	169	65058.435.peg.239	65058.432.peg.220	2320431.4.peg.588	2320431.3.peg.596	65058.401.peg.585	65058.405.peg.99	65058.406.peg.545	65058.410.peg.588	65058.411.peg.547	65058.370.peg.100	65058.373.peg.100	65058.374.peg.101	65058.375.peg.102	65058.376.peg.584	65058.437.peg.80	65058.385.peg.880	65058.419.peg.99	65058.361.peg.587	65058.362.peg.99	65058.363.peg.590	65058.420.peg.592	65058.421.peg.101	65058.428.peg.101	65058.426.peg.101	65058.313.peg.588	65058.314.peg.1216	65058.315.peg.360	65058.316.peg.590	2320456.3.peg.594	65058.317.peg.585	65058.318.peg.547	65058.319.peg.544	65058.320.peg.102	65058.321.peg.290	65058.322.peg.537	65058.323.peg.545	65058.229.peg.105	2320431.9.peg.1839	2320431.16.peg.1842	2320431.10.peg.1841	2320431.17.peg.1842	2320431.13.peg.1843	2320431.14.peg.1840	2320431.12.peg.1841	2320431.15.peg.1844	65058.241.peg.177
	170	65058.435.peg.240	65058.432.peg.221	2320431.4.peg.587	2320431.3.peg.595	65058.401.peg.584	65058.405.peg.100	65058.406.peg.544	65058.410.peg.587	65058.411.peg.546	65058.370.peg.101	65058.373.peg.101	65058.374.peg.102	65058.375.peg.103	65058.376.peg.583	65058.437.peg.81	65058.385.peg.881	65058.419.peg.100	65058.361.peg.586	65058.362.peg.100	65058.363.peg.589	65058.420.peg.591	65058.421.peg.102	65058.428.peg.102	65058.426.peg.102	65058.313.peg.587	65058.314.peg.1217	65058.315.peg.359	65058.316.peg.589	2320456.3.peg.593	65058.317.peg.584	65058.318.peg.546	65058.319.peg.543	65058.320.peg.103	65058.321.peg.289	65058.322.peg.536	65058.323.peg.544	65058.229.peg.106	2320431.9.peg.1838	2320431.16.peg.1841	2320431.10.peg.1840	2320431.17.peg.1841	2320431.13.peg.1842	2320431.14.peg.1839	2320431.12.peg.1840	2320431.15.peg.1843	65058.241.peg.178
	171	65058.435.peg.241	65058.432.peg.222	2320431.4.peg.586	2320431.3.peg.594	65058.401.peg.583	65058.405.peg.101	65058.406.peg.543	65058.410.peg.586	65058.411.peg.545	65058.370.peg.102	65058.373.peg.102	65058.374.peg.103	65058.375.peg.104	65058.376.peg.582	65058.437.peg.82	65058.385.peg.882	65058.419.peg.101	65058.361.peg.585	65058.362.peg.101	65058.363.peg.588	65058.420.peg.590	65058.421.peg.103	65058.428.peg.103	65058.426.peg.103	65058.313.peg.586	65058.314.peg.1218	65058.315.peg.358	65058.316.peg.588	2320456.3.peg.592	65058.317.peg.583	65058.318.peg.545	65058.319.peg.542	65058.320.peg.104	65058.321.peg.288	65058.322.peg.535	65058.323.peg.543	65058.229.peg.107	2320431.9.peg.1837	2320431.16.peg.1840	2320431.10.peg.1839	2320431.17.peg.1840	2320431.13.peg.1841	2320431.14.peg.1838	2320431.12.peg.1839	2320431.15.peg.1842	65058.241.peg.179
	172	65058.435.peg.242	65058.432.peg.223	2320431.4.peg.585	2320431.3.peg.593	65058.401.peg.582	65058.405.peg.102	65058.406.peg.542	65058.410.peg.585	65058.411.peg.544	65058.370.peg.103	65058.373.peg.103	65058.374.peg.104	65058.375.peg.105	65058.376.peg.581	65058.437.peg.83	65058.385.peg.883	65058.419.peg.102	65058.361.peg.584	65058.362.peg.102	65058.363.peg.587	65058.420.peg.589	65058.421.peg.104	65058.428.peg.104	65058.426.peg.104	65058.313.peg.585	65058.314.peg.1219	65058.315.peg.357	65058.316.peg.587	2320456.3.peg.591	65058.317.peg.582	65058.318.peg.544	65058.319.peg.541	65058.320.peg.105	65058.321.peg.287	65058.322.peg.534	65058.323.peg.542	65058.229.peg.108	2320431.9.peg.1836	2320431.16.peg.1839	2320431.10.peg.1838	2320431.17.peg.1839	2320431.13.peg.1840	2320431.14.peg.1837	2320431.12.peg.1838	2320431.15.peg.1841	65058.241.peg.180
	173	65058.435.peg.243	65058.432.peg.224	2320431.4.peg.584	2320431.3.peg.592	65058.401.peg.581	65058.405.peg.103	65058.406.peg.541	65058.410.peg.584	65058.411.peg.543	65058.370.peg.104	65058.373.peg.104	65058.374.peg.105	65058.375.peg.106	65058.376.peg.580	65058.437.peg.84	65058.385.peg.884	65058.419.peg.103	65058.361.peg.583	65058.362.peg.103	65058.363.peg.586	65058.420.peg.588	65058.421.peg.105	65058.428.peg.105	65058.426.peg.105	65058.313.peg.584	65058.314.peg.1220	65058.315.peg.356	65058.316.peg.586	2320456.3.peg.590	65058.317.peg.581	65058.318.peg.543	65058.319.peg.540	65058.320.peg.106	65058.321.peg.286	65058.322.peg.533	65058.323.peg.541	65058.229.peg.109	2320431.9.peg.1835	2320431.16.peg.1838	2320431.10.peg.1837	2320431.17.peg.1838	2320431.13.peg.1839	2320431.14.peg.1836	2320431.12.peg.1837	2320431.15.peg.1840	65058.241.peg.181
	174	65058.435.peg.244	65058.432.peg.225	2320431.4.peg.583	2320431.3.peg.591	65058.401.peg.580	65058.405.peg.104	65058.406.peg.540	65058.410.peg.583	65058.411.peg.542	65058.370.peg.105	65058.373.peg.105	65058.374.peg.106	65058.375.peg.107	65058.376.peg.579	65058.437.peg.85	65058.385.peg.885	65058.419.peg.104	65058.361.peg.582	65058.362.peg.104	65058.363.peg.585	65058.420.peg.587	65058.421.peg.106	65058.428.peg.106	65058.426.peg.106	65058.313.peg.583	65058.314.peg.1221	65058.315.peg.355	65058.316.peg.585	2320456.3.peg.589	65058.317.peg.580	65058.318.peg.542	65058.319.peg.539	65058.320.peg.107	65058.321.peg.285	65058.322.peg.532	65058.323.peg.540	65058.229.peg.110	2320431.9.peg.1834	2320431.16.peg.1837	2320431.10.peg.1836	2320431.17.peg.1837	2320431.13.peg.1838	2320431.14.peg.1835	2320431.12.peg.1836	2320431.15.peg.1839	65058.241.peg.182
	175	65058.435.peg.245	65058.432.peg.226	2320431.4.peg.582	2320431.3.peg.590	65058.401.peg.579	65058.405.peg.105	65058.406.peg.539	65058.410.peg.582	65058.411.peg.541	65058.370.peg.106	65058.373.peg.106	65058.374.peg.107	65058.375.peg.108	65058.376.peg.578	65058.437.peg.86	65058.385.peg.886	65058.419.peg.105	65058.361.peg.581	65058.362.peg.105	65058.363.peg.584	65058.420.peg.586	65058.421.peg.107	65058.428.peg.107	65058.426.peg.107	65058.313.peg.582	65058.314.peg.1222	65058.315.peg.354	65058.316.peg.584	2320456.3.peg.588	65058.317.peg.579	65058.318.peg.541	65058.319.peg.538	65058.320.peg.108	65058.321.peg.284	65058.322.peg.531	65058.323.peg.539	65058.229.peg.111	2320431.9.peg.1833	2320431.16.peg.1836	2320431.10.peg.1835	2320431.17.peg.1836	2320431.13.peg.1837	2320431.14.peg.1834	2320431.12.peg.1835	2320431.15.peg.1838	65058.241.peg.183
	176	65058.435.peg.246	65058.432.peg.227	2320431.4.peg.581	2320431.3.peg.589	65058.401.peg.578	65058.405.peg.106	65058.406.peg.538	65058.410.peg.581	65058.411.peg.540	65058.370.peg.107	65058.373.peg.107	65058.374.peg.108	65058.375.peg.109	65058.376.peg.577	65058.437.peg.87	65058.385.peg.887	65058.419.peg.106	65058.361.peg.580	65058.362.peg.106	65058.363.peg.583	65058.420.peg.585	65058.421.peg.108	65058.428.peg.108	65058.426.peg.108	65058.313.peg.581	65058.314.peg.1223	65058.315.peg.353	65058.316.peg.583	2320456.3.peg.587	65058.317.peg.578	65058.318.peg.540	65058.319.peg.537	65058.320.peg.109	65058.321.peg.283	65058.322.peg.530	65058.323.peg.538	65058.229.peg.112	2320431.9.peg.1832	2320431.16.peg.1835	2320431.10.peg.1834	2320431.17.peg.1835	2320431.13.peg.1836	2320431.14.peg.1833	2320431.12.peg.1834	2320431.15.peg.1837	65058.241.peg.184
	177	65058.435.peg.247	65058.432.peg.228	2320431.4.peg.580	2320431.3.peg.588	65058.401.peg.577	65058.405.peg.107	65058.406.peg.537	65058.410.peg.580	65058.411.peg.539	65058.370.peg.108	65058.373.peg.108	65058.374.peg.109	65058.375.peg.110	65058.376.peg.576	65058.437.peg.88	65058.385.peg.888	65058.419.peg.107	65058.361.peg.579	65058.362.peg.107	65058.363.peg.582	65058.420.peg.584	65058.421.peg.109	65058.428.peg.109	65058.426.peg.109	65058.313.peg.580	65058.314.peg.1224	65058.315.peg.352	65058.316.peg.582	2320456.3.peg.586	65058.317.peg.577	65058.318.peg.539	65058.319.peg.536	65058.320.peg.110	65058.321.peg.282	65058.322.peg.529	65058.323.peg.537	65058.229.peg.113	2320431.9.peg.1831	2320431.16.peg.1834	2320431.10.peg.1833	2320431.17.peg.1834	2320431.13.peg.1835	2320431.14.peg.1832	2320431.12.peg.1833	2320431.15.peg.1836	65058.241.peg.185
	178	65058.435.peg.248	65058.432.peg.229	2320431.4.peg.579	2320431.3.peg.587	65058.401.peg.576	65058.405.peg.108	65058.406.peg.536	65058.410.peg.579	65058.411.peg.538	65058.370.peg.109	65058.373.peg.109	65058.374.peg.110	65058.375.peg.111	65058.376.peg.575	65058.437.peg.89	65058.385.peg.889	65058.419.peg.108	65058.361.peg.578	65058.362.peg.108	65058.363.peg.581	65058.420.peg.583	65058.421.peg.110	65058.428.peg.110	65058.426.peg.110	65058.313.peg.579	65058.314.peg.1225	65058.315.peg.351	65058.316.peg.581	2320456.3.peg.585	65058.317.peg.576	65058.318.peg.538	65058.319.peg.535	65058.320.peg.111	65058.321.peg.281	65058.322.peg.528	65058.323.peg.536	65058.229.peg.114	2320431.9.peg.1830	2320431.16.peg.1833	2320431.10.peg.1832	2320431.17.peg.1833	2320431.13.peg.1834	2320431.14.peg.1831	2320431.12.peg.1832	2320431.15.peg.1835	65058.241.peg.186
	179	65058.435.peg.249	65058.432.peg.230	2320431.4.peg.578	2320431.3.peg.586	65058.401.peg.575	65058.405.peg.109	65058.406.peg.535	65058.410.peg.578	65058.411.peg.537	65058.370.peg.110	65058.373.peg.110	65058.374.peg.111	65058.375.peg.112	65058.376.peg.574	65058.437.peg.90	65058.385.peg.890	65058.419.peg.109	65058.361.peg.577	65058.362.peg.109	65058.363.peg.580	65058.420.peg.582	65058.421.peg.111	65058.428.peg.111	65058.426.peg.111	65058.313.peg.578	65058.314.peg.1226	65058.315.peg.350	65058.316.peg.580	2320456.3.peg.584	65058.317.peg.575	65058.318.peg.537	65058.319.peg.534	65058.320.peg.112	65058.321.peg.280	65058.322.peg.527	65058.323.peg.535	65058.229.peg.115	2320431.9.peg.1829	2320431.16.peg.1832	2320431.10.peg.1831	2320431.17.peg.1832	2320431.13.peg.1833	2320431.14.peg.1830	2320431.12.peg.1831	2320431.15.peg.1834	65058.241.peg.187
	180	65058.435.peg.250	65058.432.peg.231	2320431.4.peg.577	2320431.3.peg.585	65058.401.peg.574	65058.405.peg.110	65058.406.peg.534	65058.410.peg.577	65058.411.peg.536	65058.370.peg.111	65058.373.peg.111	65058.374.peg.112	65058.375.peg.113	65058.376.peg.573	65058.437.peg.91	65058.385.peg.891	65058.419.peg.110	65058.361.peg.576	65058.362.peg.110	65058.363.peg.579	65058.420.peg.581	65058.421.peg.112	65058.428.peg.112	65058.426.peg.112	65058.313.peg.577	65058.314.peg.1227	65058.315.peg.349	65058.316.peg.579	2320456.3.peg.583	65058.317.peg.574	65058.318.peg.536	65058.319.peg.533	65058.320.peg.113	65058.321.peg.279	65058.322.peg.526	65058.323.peg.534	65058.229.peg.116	2320431.9.peg.1828	2320431.16.peg.1831	2320431.10.peg.1830	2320431.17.peg.1831	2320431.13.peg.1832	2320431.14.peg.1829	2320431.12.peg.1830	2320431.15.peg.1833	65058.241.peg.188
	181	65058.435.peg.251	65058.432.peg.232	2320431.4.peg.576	2320431.3.peg.584	65058.401.peg.573	65058.405.peg.111	65058.406.peg.533	65058.410.peg.576	65058.411.peg.535	65058.370.peg.112	65058.373.peg.112	65058.374.peg.113	65058.375.peg.114	65058.376.peg.572	65058.437.peg.92	65058.385.peg.892	65058.419.peg.111	65058.361.peg.575	65058.362.peg.111	65058.363.peg.578	65058.420.peg.580	65058.421.peg.113	65058.428.peg.113	65058.426.peg.113	65058.313.peg.576	65058.314.peg.1228	65058.315.peg.348	65058.316.peg.578	2320456.3.peg.582	65058.317.peg.573	65058.318.peg.535	65058.319.peg.532	65058.320.peg.114	65058.321.peg.278	65058.322.peg.525	65058.323.peg.533	65058.229.peg.117	2320431.9.peg.1827	2320431.16.peg.1830	2320431.10.peg.1829	2320431.17.peg.1830	2320431.13.peg.1831	2320431.14.peg.1828	2320431.12.peg.1829	2320431.15.peg.1832	65058.241.peg.189
	182	65058.435.peg.252	65058.432.peg.233	2320431.4.peg.575	2320431.3.peg.583	65058.401.peg.572	65058.405.peg.112	65058.406.peg.532	65058.410.peg.575	65058.411.peg.534	65058.370.peg.113	65058.373.peg.113	65058.374.peg.114	65058.375.peg.115	65058.376.peg.571	65058.437.peg.93	65058.385.peg.893	65058.419.peg.112	65058.361.peg.574	65058.362.peg.112	65058.363.peg.577	65058.420.peg.579	65058.421.peg.114	65058.428.peg.114	65058.426.peg.114	65058.313.peg.575	65058.314.peg.1229	65058.315.peg.347	65058.316.peg.577	2320456.3.peg.581	65058.317.peg.572	65058.318.peg.534	65058.319.peg.531	65058.320.peg.115	65058.321.peg.277	65058.322.peg.524	65058.323.peg.532	65058.229.peg.118	2320431.9.peg.1826	2320431.16.peg.1829	2320431.10.peg.1828	2320431.17.peg.1829	2320431.13.peg.1830	2320431.14.peg.1827	2320431.12.peg.1828	2320431.15.peg.1831	65058.241.peg.190
	183	65058.435.peg.253	65058.432.peg.234	2320431.4.peg.574	2320431.3.peg.582	65058.401.peg.571	65058.405.peg.113	65058.406.peg.531	65058.410.peg.574	65058.411.peg.533	65058.370.peg.114	65058.373.peg.114	65058.374.peg.115	65058.375.peg.116	65058.376.peg.570	65058.437.peg.94	65058.385.peg.894	65058.419.peg.113	65058.361.peg.573	65058.362.peg.113	65058.363.peg.576	65058.420.peg.578	65058.421.peg.115	65058.428.peg.115	65058.426.peg.115	65058.313.peg.574	65058.314.peg.1230	65058.315.peg.346	65058.316.peg.576	2320456.3.peg.580	65058.317.peg.571	65058.318.peg.533	65058.319.peg.530	65058.320.peg.116	65058.321.peg.276	65058.322.peg.523	65058.323.peg.531	65058.229.peg.119	2320431.9.peg.1825	2320431.16.peg.1828	2320431.10.peg.1827	2320431.17.peg.1828	2320431.13.peg.1829	2320431.14.peg.1826	2320431.12.peg.1827	2320431.15.peg.1830	65058.241.peg.191
	184	65058.435.peg.254	65058.432.peg.235	2320431.4.peg.573	2320431.3.peg.581	65058.401.peg.570	65058.405.peg.114	65058.406.peg.530	65058.410.peg.573	65058.411.peg.532	65058.370.peg.115	65058.373.peg.115	65058.374.peg.116	65058.375.peg.117	65058.376.peg.569	65058.437.peg.95	65058.385.peg.895	65058.419.peg.114	65058.361.peg.572	65058.362.peg.114	65058.363.peg.575	65058.420.peg.577	65058.421.peg.116	65058.428.peg.116	65058.426.peg.116	65058.313.peg.573	65058.314.peg.1231	65058.315.peg.345	65058.316.peg.575	2320456.3.peg.579	65058.317.peg.570	65058.318.peg.532	65058.319.peg.529	65058.320.peg.117	65058.321.peg.275	65058.322.peg.522	65058.323.peg.530	65058.229.peg.120	2320431.9.peg.1824	2320431.16.peg.1827	2320431.10.peg.1826	2320431.17.peg.1827	2320431.13.peg.1828	2320431.14.peg.1825	2320431.12.peg.1826	2320431.15.peg.1829	65058.241.peg.192
	185	65058.435.peg.256	65058.432.peg.236	2320431.4.peg.571	2320431.3.peg.580	65058.401.peg.569	65058.405.peg.115	65058.406.peg.528	65058.410.peg.571	65058.411.peg.530	65058.370.peg.116	65058.373.peg.116	65058.374.peg.118	65058.375.peg.119	65058.376.peg.568	65058.437.peg.97	65058.385.peg.896	65058.419.peg.116	65058.361.peg.571	65058.362.peg.116	65058.363.peg.573	65058.420.peg.575	65058.421.peg.117	65058.428.peg.117	65058.426.peg.117	65058.313.peg.571	65058.314.peg.1232	65058.315.peg.344	65058.316.peg.573	2320456.3.peg.578	65058.317.peg.568	65058.318.peg.530	65058.319.peg.528	65058.320.peg.119	65058.321.peg.274	65058.322.peg.521	65058.323.peg.528	65058.229.peg.122	2320431.9.peg.1823	2320431.16.peg.1826	2320431.10.peg.1825	2320431.17.peg.1826	2320431.13.peg.1827	2320431.14.peg.1824	2320431.12.peg.1825	2320431.15.peg.1828	65058.241.peg.194
	186	65058.435.peg.257	65058.432.peg.237	2320431.4.peg.570	2320431.3.peg.579	65058.401.peg.568	65058.405.peg.116	65058.406.peg.527	65058.410.peg.570	65058.411.peg.529	65058.370.peg.117	65058.373.peg.117	65058.374.peg.119	65058.375.peg.120	65058.376.peg.567	65058.437.peg.98	65058.385.peg.897	65058.419.peg.117	65058.361.peg.570	65058.362.peg.117	65058.363.peg.572	65058.420.peg.574	65058.421.peg.118	65058.428.peg.118	65058.426.peg.118	65058.313.peg.570	65058.314.peg.1233	65058.315.peg.343	65058.316.peg.572	2320456.3.peg.577	65058.317.peg.567	65058.318.peg.529	65058.319.peg.527	65058.320.peg.120	65058.321.peg.273	65058.322.peg.520	65058.323.peg.527	65058.229.peg.123	2320431.9.peg.1822	2320431.16.peg.1825	2320431.10.peg.1824	2320431.17.peg.1825	2320431.13.peg.1826	2320431.14.peg.1823	2320431.12.peg.1824	2320431.15.peg.1827	65058.241.peg.195
	187	65058.435.peg.258	65058.432.peg.238	2320431.4.peg.569	2320431.3.peg.578	65058.401.peg.567	65058.405.peg.117	65058.406.peg.526	65058.410.peg.569	65058.411.peg.528	65058.370.peg.118	65058.373.peg.118	65058.374.peg.120	65058.375.peg.121	65058.376.peg.566	65058.437.peg.99	65058.385.peg.898	65058.419.peg.118	65058.361.peg.569	65058.362.peg.118	65058.363.peg.571	65058.420.peg.573	65058.421.peg.119	65058.428.peg.119	65058.426.peg.119	65058.313.peg.569	65058.314.peg.1234	65058.315.peg.342	65058.316.peg.571	2320456.3.peg.576	65058.317.peg.566	65058.318.peg.528	65058.319.peg.526	65058.320.peg.121	65058.321.peg.272	65058.322.peg.519	65058.323.peg.526	65058.229.peg.124	2320431.9.peg.1821	2320431.16.peg.1824	2320431.10.peg.1823	2320431.17.peg.1824	2320431.13.peg.1825	2320431.14.peg.1822	2320431.12.peg.1823	2320431.15.peg.1826	65058.241.peg.196
	188	65058.435.peg.259	65058.432.peg.239	2320431.4.peg.568	2320431.3.peg.577	65058.401.peg.566	65058.405.peg.118	65058.406.peg.525	65058.410.peg.568	65058.411.peg.527	65058.370.peg.119	65058.373.peg.119	65058.374.peg.121	65058.375.peg.122	65058.376.peg.565	65058.437.peg.100	65058.385.peg.899	65058.419.peg.119	65058.361.peg.568	65058.362.peg.119	65058.363.peg.570	65058.420.peg.572	65058.421.peg.120	65058.428.peg.120	65058.426.peg.120	65058.313.peg.568	65058.314.peg.1235	65058.315.peg.341	65058.316.peg.570	2320456.3.peg.575	65058.317.peg.565	65058.318.peg.527	65058.319.peg.525	65058.320.peg.122	65058.321.peg.271	65058.322.peg.518	65058.323.peg.525	65058.229.peg.125	2320431.9.peg.1820	2320431.16.peg.1823	2320431.10.peg.1822	2320431.17.peg.1823	2320431.13.peg.1824	2320431.14.peg.1821	2320431.12.peg.1822	2320431.15.peg.1825	65058.241.peg.197
	189	65058.435.peg.260	65058.432.peg.240	2320431.4.peg.567	2320431.3.peg.576	65058.401.peg.565	65058.405.peg.119	65058.406.peg.524	65058.410.peg.567	65058.411.peg.526	65058.370.peg.120	65058.373.peg.120	65058.374.peg.122	65058.375.peg.123	65058.376.peg.564	65058.437.peg.101	65058.385.peg.900	65058.419.peg.120	65058.361.peg.567	65058.362.peg.120	65058.363.peg.569	65058.420.peg.571	65058.421.peg.121	65058.428.peg.121	65058.426.peg.121	65058.313.peg.567	65058.314.peg.1236	65058.315.peg.340	65058.316.peg.569	2320456.3.peg.574	65058.317.peg.564	65058.318.peg.526	65058.319.peg.524	65058.320.peg.123	65058.321.peg.270	65058.322.peg.517	65058.323.peg.524	65058.229.peg.126	2320431.9.peg.1819	2320431.16.peg.1822	2320431.10.peg.1821	2320431.17.peg.1822	2320431.13.peg.1823	2320431.14.peg.1820	2320431.12.peg.1821	2320431.15.peg.1824	65058.241.peg.198
	190	65058.435.peg.261	65058.432.peg.241	2320431.4.peg.566	2320431.3.peg.575	65058.401.peg.564	65058.405.peg.120	65058.406.peg.523	65058.410.peg.566	65058.411.peg.525	65058.370.peg.121	65058.373.peg.121	65058.374.peg.123	65058.375.peg.124	65058.376.peg.563	65058.437.peg.102	65058.385.peg.901	65058.419.peg.121	65058.361.peg.566	65058.362.peg.121	65058.363.peg.568	65058.420.peg.570	65058.421.peg.122	65058.428.peg.122	65058.426.peg.122	65058.313.peg.566	65058.314.peg.1237	65058.315.peg.339	65058.316.peg.568	2320456.3.peg.573	65058.317.peg.563	65058.318.peg.525	65058.319.peg.523	65058.320.peg.124	65058.321.peg.269	65058.322.peg.516	65058.323.peg.523	65058.229.peg.127	2320431.9.peg.1818	2320431.16.peg.1821	2320431.10.peg.1820	2320431.17.peg.1821	2320431.13.peg.1822	2320431.14.peg.1819	2320431.12.peg.1820	2320431.15.peg.1823	65058.241.peg.199
	191	65058.435.peg.262	65058.432.peg.242	2320431.4.peg.565	2320431.3.peg.574	65058.401.peg.563	65058.405.peg.121	65058.406.peg.522	65058.410.peg.565	65058.411.peg.524	65058.370.peg.122	65058.373.peg.122	65058.374.peg.124	65058.375.peg.125	65058.376.peg.562	65058.437.peg.103	65058.385.peg.902	65058.419.peg.122	65058.361.peg.565	65058.362.peg.122	65058.363.peg.567	65058.420.peg.569	65058.421.peg.123	65058.428.peg.123	65058.426.peg.123	65058.313.peg.565	65058.314.peg.1238	65058.315.peg.338	65058.316.peg.567	2320456.3.peg.572	65058.317.peg.562	65058.318.peg.524	65058.319.peg.522	65058.320.peg.125	65058.321.peg.268	65058.322.peg.515	65058.323.peg.522	65058.229.peg.128	2320431.9.peg.1817	2320431.16.peg.1820	2320431.10.peg.1819	2320431.17.peg.1820	2320431.13.peg.1821	2320431.14.peg.1818	2320431.12.peg.1819	2320431.15.peg.1822	65058.241.peg.200
	192	65058.435.peg.263	65058.432.peg.243	2320431.4.peg.564	2320431.3.peg.573	65058.401.peg.562	65058.405.peg.122	65058.406.peg.521	65058.410.peg.564	65058.411.peg.523	65058.370.peg.123	65058.373.peg.123	65058.374.peg.125	65058.375.peg.126	65058.376.peg.561	65058.437.peg.104	65058.385.peg.903	65058.419.peg.123	65058.361.peg.564	65058.362.peg.123	65058.363.peg.566	65058.420.peg.568	65058.421.peg.124	65058.428.peg.124	65058.426.peg.124	65058.313.peg.564	65058.314.peg.1239	65058.315.peg.337	65058.316.peg.566	2320456.3.peg.571	65058.317.peg.561	65058.318.peg.523	65058.319.peg.521	65058.320.peg.126	65058.321.peg.267	65058.322.peg.514	65058.323.peg.521	65058.229.peg.129	2320431.9.peg.1816	2320431.16.peg.1819	2320431.10.peg.1818	2320431.17.peg.1819	2320431.13.peg.1820	2320431.14.peg.1817	2320431.12.peg.1818	2320431.15.peg.1821	65058.241.peg.201
	193	65058.435.peg.265	65058.432.peg.245	2320431.4.peg.562	2320431.3.peg.570	65058.401.peg.560	65058.405.peg.125	65058.406.peg.519	65058.410.peg.561	65058.411.peg.521	65058.370.peg.125	65058.373.peg.125	65058.374.peg.128	65058.375.peg.128	65058.376.peg.560	65058.437.peg.107	65058.385.peg.904	65058.419.peg.126	65058.361.peg.562	65058.362.peg.126	65058.363.peg.563	65058.420.peg.565	65058.421.peg.125	65058.428.peg.126	65058.426.peg.126	65058.313.peg.561	65058.314.peg.1242	65058.315.peg.334	65058.316.peg.563	2320456.3.peg.569	65058.317.peg.558	65058.318.peg.521	65058.319.peg.519	65058.320.peg.128	65058.321.peg.264	65058.322.peg.511	65058.323.peg.519	65058.229.peg.132	2320431.9.peg.1814	2320431.16.peg.1816	2320431.10.peg.1816	2320431.17.peg.1817	2320431.13.peg.1818	2320431.14.peg.1815	2320431.12.peg.1816	2320431.15.peg.1818	65058.241.peg.203
	194	65058.435.peg.266	65058.432.peg.246	2320431.4.peg.561	2320431.3.peg.569	65058.401.peg.559	65058.405.peg.126	65058.406.peg.518	65058.410.peg.560	65058.411.peg.520	65058.370.peg.126	65058.373.peg.126	65058.374.peg.129	65058.375.peg.129	65058.376.peg.559	65058.437.peg.108	65058.385.peg.905	65058.419.peg.127	65058.361.peg.561	65058.362.peg.127	65058.363.peg.562	65058.420.peg.564	65058.421.peg.126	65058.428.peg.127	65058.426.peg.127	65058.313.peg.560	65058.314.peg.1243	65058.315.peg.333	65058.316.peg.562	2320456.3.peg.568	65058.317.peg.557	65058.318.peg.520	65058.319.peg.518	65058.320.peg.129	65058.321.peg.263	65058.322.peg.510	65058.323.peg.518	65058.229.peg.133	2320431.9.peg.1813	2320431.16.peg.1815	2320431.10.peg.1815	2320431.17.peg.1816	2320431.13.peg.1817	2320431.14.peg.1814	2320431.12.peg.1815	2320431.15.peg.1817	65058.241.peg.204
	195	65058.435.peg.268	65058.432.peg.247	2320431.4.peg.560	2320431.3.peg.568	65058.401.peg.558	65058.405.peg.127	65058.406.peg.517	65058.410.peg.558	65058.411.peg.518	65058.370.peg.128	65058.373.peg.128	65058.374.peg.131	65058.375.peg.131	65058.376.peg.558	65058.437.peg.109	65058.385.peg.907	65058.419.peg.129	65058.361.peg.559	65058.362.peg.129	65058.363.peg.561	65058.420.peg.563	65058.421.peg.128	65058.428.peg.128	65058.426.peg.128	65058.313.peg.559	65058.314.peg.1244	65058.315.peg.332	65058.316.peg.560	2320456.3.peg.567	65058.317.peg.556	65058.318.peg.518	65058.319.peg.517	65058.320.peg.130	65058.321.peg.261	65058.322.peg.509	65058.323.peg.516	65058.229.peg.135	2320431.9.peg.1811	2320431.16.peg.1813	2320431.10.peg.1814	2320431.17.peg.1815	2320431.13.peg.1815	2320431.14.peg.1812	2320431.12.peg.1814	2320431.15.peg.1815	65058.241.peg.206
	196	65058.435.peg.269	65058.432.peg.248	2320431.4.peg.559	2320431.3.peg.567	65058.401.peg.557	65058.405.peg.128	65058.406.peg.516	65058.410.peg.557	65058.411.peg.517	65058.370.peg.129	65058.373.peg.129	65058.374.peg.132	65058.375.peg.132	65058.376.peg.557	65058.437.peg.110	65058.385.peg.908	65058.419.peg.130	65058.361.peg.558	65058.362.peg.130	65058.363.peg.560	65058.420.peg.562	65058.421.peg.129	65058.428.peg.129	65058.426.peg.129	65058.313.peg.558	65058.314.peg.1245	65058.315.peg.331	65058.316.peg.559	2320456.3.peg.566	65058.317.peg.555	65058.318.peg.517	65058.319.peg.516	65058.320.peg.131	65058.321.peg.260	65058.322.peg.508	65058.323.peg.515	65058.229.peg.136	2320431.9.peg.1810	2320431.16.peg.1812	2320431.10.peg.1813	2320431.17.peg.1814	2320431.13.peg.1814	2320431.14.peg.1811	2320431.12.peg.1813	2320431.15.peg.1814	65058.241.peg.207
	197	65058.435.peg.270	65058.432.peg.249	2320431.4.peg.558	2320431.3.peg.566	65058.401.peg.556	65058.405.peg.129	65058.406.peg.515	65058.410.peg.556	65058.411.peg.516	65058.370.peg.130	65058.373.peg.130	65058.374.peg.133	65058.375.peg.133	65058.376.peg.556	65058.437.peg.111	65058.385.peg.909	65058.419.peg.131	65058.361.peg.557	65058.362.peg.131	65058.363.peg.559	65058.420.peg.561	65058.421.peg.130	65058.428.peg.130	65058.426.peg.130	65058.313.peg.557	65058.314.peg.1246	65058.315.peg.330	65058.316.peg.558	2320456.3.peg.565	65058.317.peg.554	65058.318.peg.516	65058.319.peg.515	65058.320.peg.132	65058.321.peg.259	65058.322.peg.507	65058.323.peg.514	65058.229.peg.137	2320431.9.peg.1809	2320431.16.peg.1811	2320431.10.peg.1812	2320431.17.peg.1813	2320431.13.peg.1813	2320431.14.peg.1810	2320431.12.peg.1812	2320431.15.peg.1813	65058.241.peg.208
	198	65058.435.peg.271	65058.432.peg.250	2320431.4.peg.557	2320431.3.peg.565	65058.401.peg.555	65058.405.peg.130	65058.406.peg.514	65058.410.peg.555	65058.411.peg.515	65058.370.peg.131	65058.373.peg.131	65058.374.peg.134	65058.375.peg.134	65058.376.peg.555	65058.437.peg.112	65058.385.peg.910	65058.419.peg.132	65058.361.peg.556	65058.362.peg.132	65058.363.peg.558	65058.420.peg.560	65058.421.peg.131	65058.428.peg.131	65058.426.peg.131	65058.313.peg.556	65058.314.peg.1247	65058.315.peg.329	65058.316.peg.557	2320456.3.peg.564	65058.317.peg.553	65058.318.peg.515	65058.319.peg.514	65058.320.peg.133	65058.321.peg.258	65058.322.peg.506	65058.323.peg.513	65058.229.peg.138	2320431.9.peg.1808	2320431.16.peg.1810	2320431.10.peg.1811	2320431.17.peg.1812	2320431.13.peg.1812	2320431.14.peg.1809	2320431.12.peg.1811	2320431.15.peg.1812	65058.241.peg.209
	199	65058.435.peg.272	65058.432.peg.251	2320431.4.peg.556	2320431.3.peg.564	65058.401.peg.554	65058.405.peg.131	65058.406.peg.513	65058.410.peg.554	65058.411.peg.514	65058.370.peg.132	65058.373.peg.132	65058.374.peg.135	65058.375.peg.135	65058.376.peg.554	65058.437.peg.113	65058.385.peg.911	65058.419.peg.133	65058.361.peg.555	65058.362.peg.133	65058.363.peg.557	65058.420.peg.559	65058.421.peg.132	65058.428.peg.132	65058.426.peg.132	65058.313.peg.555	65058.314.peg.1248	65058.315.peg.328	65058.316.peg.556	2320456.3.peg.563	65058.317.peg.552	65058.318.peg.514	65058.319.peg.513	65058.320.peg.134	65058.321.peg.257	65058.322.peg.505	65058.323.peg.512	65058.229.peg.139	2320431.9.peg.1807	2320431.16.peg.1809	2320431.10.peg.1810	2320431.17.peg.1811	2320431.13.peg.1811	2320431.14.peg.1808	2320431.12.peg.1810	2320431.15.peg.1811	65058.241.peg.210
	200	65058.435.peg.273	65058.432.peg.252	2320431.4.peg.555	2320431.3.peg.563	65058.401.peg.553	65058.405.peg.132	65058.406.peg.512	65058.410.peg.553	65058.411.peg.513	65058.370.peg.133	65058.373.peg.133	65058.374.peg.136	65058.375.peg.136	65058.376.peg.553	65058.437.peg.114	65058.385.peg.912	65058.419.peg.134	65058.361.peg.554	65058.362.peg.134	65058.363.peg.556	65058.420.peg.558	65058.421.peg.133	65058.428.peg.133	65058.426.peg.133	65058.313.peg.554	65058.314.peg.1249	65058.315.peg.327	65058.316.peg.555	2320456.3.peg.562	65058.317.peg.551	65058.318.peg.513	65058.319.peg.512	65058.320.peg.135	65058.321.peg.256	65058.322.peg.504	65058.323.peg.511	65058.229.peg.140	2320431.9.peg.1806	2320431.16.peg.1808	2320431.10.peg.1809	2320431.17.peg.1810	2320431.13.peg.1810	2320431.14.peg.1807	2320431.12.peg.1809	2320431.15.peg.1810	65058.241.peg.211
	201	65058.435.peg.274	65058.432.peg.253	2320431.4.peg.554	2320431.3.peg.562	65058.401.peg.552	65058.405.peg.133	65058.406.peg.511	65058.410.peg.552	65058.411.peg.512	65058.370.peg.134	65058.373.peg.134	65058.374.peg.137	65058.375.peg.137	65058.376.peg.552	65058.437.peg.115	65058.385.peg.913	65058.419.peg.135	65058.361.peg.553	65058.362.peg.135	65058.363.peg.555	65058.420.peg.557	65058.421.peg.134	65058.428.peg.134	65058.426.peg.134	65058.313.peg.553	65058.314.peg.1250	65058.315.peg.326	65058.316.peg.554	2320456.3.peg.561	65058.317.peg.550	65058.318.peg.512	65058.319.peg.511	65058.320.peg.136	65058.321.peg.255	65058.322.peg.503	65058.323.peg.510	65058.229.peg.141	2320431.9.peg.1805	2320431.16.peg.1807	2320431.10.peg.1808	2320431.17.peg.1809	2320431.13.peg.1809	2320431.14.peg.1806	2320431.12.peg.1808	2320431.15.peg.1809	65058.241.peg.212
Cell wall-associated hydrolases (invasion-associated proteins) (cwlH) (CULC809_01521)	202	65058.435.peg.275	65058.432.peg.254	2320431.4.peg.553	2320431.3.peg.561	65058.401.peg.551	65058.405.peg.134	65058.406.peg.510	65058.410.peg.551	65058.411.peg.511	65058.370.peg.135	65058.373.peg.135	65058.374.peg.138	65058.375.peg.138	65058.376.peg.551	65058.437.peg.116	65058.385.peg.914	65058.419.peg.136	65058.361.peg.552	65058.362.peg.136	65058.363.peg.554	65058.420.peg.556	65058.421.peg.135	65058.428.peg.135	65058.426.peg.135	65058.313.peg.552	65058.314.peg.1251	65058.315.peg.325	65058.316.peg.553	2320456.3.peg.560	65058.317.peg.549	65058.318.peg.511	65058.319.peg.510	65058.320.peg.137	65058.321.peg.254	65058.322.peg.502	65058.323.peg.509	65058.229.peg.142	2320431.9.peg.1804	2320431.16.peg.1806	2320431.10.peg.1807	2320431.17.peg.1808	2320431.13.peg.1808	2320431.14.peg.1805	2320431.12.peg.1807	2320431.15.peg.1808	65058.241.peg.213
	203	65058.435.peg.276	65058.432.peg.255	2320431.4.peg.552	2320431.3.peg.560	65058.401.peg.550	65058.405.peg.135	65058.406.peg.509	65058.410.peg.550	65058.411.peg.510	65058.370.peg.136	65058.373.peg.136	65058.374.peg.139	65058.375.peg.139	65058.376.peg.550	65058.437.peg.117	65058.385.peg.915	65058.419.peg.137	65058.361.peg.551	65058.362.peg.137	65058.363.peg.553	65058.420.peg.555	65058.421.peg.136	65058.428.peg.136	65058.426.peg.136	65058.313.peg.551	65058.314.peg.1252	65058.315.peg.324	65058.316.peg.552	2320456.3.peg.559	65058.317.peg.548	65058.318.peg.510	65058.319.peg.509	65058.320.peg.138	65058.321.peg.253	65058.322.peg.501	65058.323.peg.508	65058.229.peg.143	2320431.9.peg.1803	2320431.16.peg.1805	2320431.10.peg.1806	2320431.17.peg.1807	2320431.13.peg.1807	2320431.14.peg.1804	2320431.12.peg.1806	2320431.15.peg.1807	65058.241.peg.214
	204	65058.435.peg.277	65058.432.peg.256	2320431.4.peg.551	2320431.3.peg.559	65058.401.peg.549	65058.405.peg.136	65058.406.peg.508	65058.410.peg.549	65058.411.peg.509	65058.370.peg.137	65058.373.peg.137	65058.374.peg.140	65058.375.peg.140	65058.376.peg.549	65058.437.peg.118	65058.385.peg.916	65058.419.peg.138	65058.361.peg.550	65058.362.peg.138	65058.363.peg.552	65058.420.peg.554	65058.421.peg.137	65058.428.peg.137	65058.426.peg.137	65058.313.peg.550	65058.314.peg.1253	65058.315.peg.323	65058.316.peg.551	2320456.3.peg.558	65058.317.peg.547	65058.318.peg.509	65058.319.peg.508	65058.320.peg.139	65058.321.peg.252	65058.322.peg.500	65058.323.peg.507	65058.229.peg.144	2320431.9.peg.1802	2320431.16.peg.1804	2320431.10.peg.1805	2320431.17.peg.1806	2320431.13.peg.1806	2320431.14.peg.1803	2320431.12.peg.1805	2320431.15.peg.1806	65058.241.peg.215
	205	65058.435.peg.278	65058.432.peg.257	2320431.4.peg.550	2320431.3.peg.558	65058.401.peg.548	65058.405.peg.137	65058.406.peg.507	65058.410.peg.548	65058.411.peg.508	65058.370.peg.138	65058.373.peg.138	65058.374.peg.141	65058.375.peg.141	65058.376.peg.548	65058.437.peg.119	65058.385.peg.917	65058.419.peg.139	65058.361.peg.549	65058.362.peg.139	65058.363.peg.551	65058.420.peg.553	65058.421.peg.138	65058.428.peg.138	65058.426.peg.138	65058.313.peg.549	65058.314.peg.1254	65058.315.peg.322	65058.316.peg.550	2320456.3.peg.557	65058.317.peg.546	65058.318.peg.508	65058.319.peg.507	65058.320.peg.140	65058.321.peg.251	65058.322.peg.499	65058.323.peg.506	65058.229.peg.145	2320431.9.peg.1801	2320431.16.peg.1803	2320431.10.peg.1804	2320431.17.peg.1805	2320431.13.peg.1805	2320431.14.peg.1802	2320431.12.peg.1804	2320431.15.peg.1805	65058.241.peg.216
	206	65058.435.peg.279	65058.432.peg.258	2320431.4.peg.549	2320431.3.peg.557	65058.401.peg.547	65058.405.peg.138	65058.406.peg.506	65058.410.peg.547	65058.411.peg.507	65058.370.peg.139	65058.373.peg.139	65058.374.peg.142	65058.375.peg.142	65058.376.peg.547	65058.437.peg.120	65058.385.peg.918	65058.419.peg.140	65058.361.peg.548	65058.362.peg.140	65058.363.peg.550	65058.420.peg.552	65058.421.peg.139	65058.428.peg.139	65058.426.peg.139	65058.313.peg.548	65058.314.peg.1255	65058.315.peg.321	65058.316.peg.549	2320456.3.peg.556	65058.317.peg.545	65058.318.peg.507	65058.319.peg.506	65058.320.peg.141	65058.321.peg.250	65058.322.peg.498	65058.323.peg.505	65058.229.peg.146	2320431.9.peg.1800	2320431.16.peg.1802	2320431.10.peg.1803	2320431.17.peg.1804	2320431.13.peg.1804	2320431.14.peg.1801	2320431.12.peg.1803	2320431.15.peg.1804	65058.241.peg.217
	207	65058.435.peg.280	65058.432.peg.259	2320431.4.peg.548	2320431.3.peg.556	65058.401.peg.546	65058.405.peg.139	65058.406.peg.505	65058.410.peg.546	65058.411.peg.506	65058.370.peg.140	65058.373.peg.140	65058.374.peg.143	65058.375.peg.143	65058.376.peg.546	65058.437.peg.121	65058.385.peg.919	65058.419.peg.141	65058.361.peg.547	65058.362.peg.141	65058.363.peg.549	65058.420.peg.551	65058.421.peg.140	65058.428.peg.140	65058.426.peg.140	65058.313.peg.547	65058.314.peg.1256	65058.315.peg.320	65058.316.peg.548	2320456.3.peg.555	65058.317.peg.544	65058.318.peg.506	65058.319.peg.505	65058.320.peg.142	65058.321.peg.249	65058.322.peg.497	65058.323.peg.504	65058.229.peg.147	2320431.9.peg.1799	2320431.16.peg.1801	2320431.10.peg.1802	2320431.17.peg.1803	2320431.13.peg.1803	2320431.14.peg.1800	2320431.12.peg.1802	2320431.15.peg.1803	65058.241.peg.218
	208	65058.435.peg.281	65058.432.peg.260	2320431.4.peg.547	2320431.3.peg.555	65058.401.peg.545	65058.405.peg.140	65058.406.peg.504	65058.410.peg.545	65058.411.peg.505	65058.370.peg.141	65058.373.peg.141	65058.374.peg.144	65058.375.peg.144	65058.376.peg.545	65058.437.peg.122	65058.385.peg.920	65058.419.peg.142	65058.361.peg.546	65058.362.peg.142	65058.363.peg.548	65058.420.peg.550	65058.421.peg.141	65058.428.peg.141	65058.426.peg.141	65058.313.peg.546	65058.314.peg.1257	65058.315.peg.319	65058.316.peg.547	2320456.3.peg.554	65058.317.peg.543	65058.318.peg.505	65058.319.peg.504	65058.320.peg.143	65058.321.peg.248	65058.322.peg.496	65058.323.peg.503	65058.229.peg.148	2320431.9.peg.1798	2320431.16.peg.1800	2320431.10.peg.1801	2320431.17.peg.1802	2320431.13.peg.1802	2320431.14.peg.1799	2320431.12.peg.1801	2320431.15.peg.1802	65058.241.peg.219
	209	65058.435.peg.282	65058.432.peg.261	2320431.4.peg.546	2320431.3.peg.554	65058.401.peg.544	65058.405.peg.141	65058.406.peg.503	65058.410.peg.544	65058.411.peg.504	65058.370.peg.142	65058.373.peg.142	65058.374.peg.145	65058.375.peg.145	65058.376.peg.544	65058.437.peg.123	65058.385.peg.921	65058.419.peg.143	65058.361.peg.545	65058.362.peg.143	65058.363.peg.547	65058.420.peg.549	65058.421.peg.142	65058.428.peg.142	65058.426.peg.142	65058.313.peg.545	65058.314.peg.1258	65058.315.peg.318	65058.316.peg.546	2320456.3.peg.553	65058.317.peg.542	65058.318.peg.504	65058.319.peg.503	65058.320.peg.144	65058.321.peg.247	65058.322.peg.495	65058.323.peg.502	65058.229.peg.149	2320431.9.peg.1797	2320431.16.peg.1799	2320431.10.peg.1800	2320431.17.peg.1801	2320431.13.peg.1801	2320431.14.peg.1798	2320431.12.peg.1800	2320431.15.peg.1801	65058.241.peg.220
	210	65058.435.peg.283	65058.432.peg.262	2320431.4.peg.545	2320431.3.peg.553	65058.401.peg.543	65058.405.peg.142	65058.406.peg.502	65058.410.peg.543	65058.411.peg.503	65058.370.peg.143	65058.373.peg.143	65058.374.peg.146	65058.375.peg.146	65058.376.peg.543	65058.437.peg.124	65058.385.peg.922	65058.419.peg.144	65058.361.peg.544	65058.362.peg.144	65058.363.peg.546	65058.420.peg.548	65058.421.peg.143	65058.428.peg.143	65058.426.peg.143	65058.313.peg.544	65058.314.peg.1259	65058.315.peg.317	65058.316.peg.545	2320456.3.peg.552	65058.317.peg.541	65058.318.peg.503	65058.319.peg.502	65058.320.peg.145	65058.321.peg.246	65058.322.peg.494	65058.323.peg.501	65058.229.peg.150	2320431.9.peg.1796	2320431.16.peg.1798	2320431.10.peg.1799	2320431.17.peg.1800	2320431.13.peg.1800	2320431.14.peg.1797	2320431.12.peg.1799	2320431.15.peg.1800	65058.241.peg.221
	211	65058.435.peg.284	65058.432.peg.263	2320431.4.peg.544	2320431.3.peg.552	65058.401.peg.542	65058.405.peg.143	65058.406.peg.501	65058.410.peg.542	65058.411.peg.502	65058.370.peg.144	65058.373.peg.144	65058.374.peg.147	65058.375.peg.147	65058.376.peg.542	65058.437.peg.125	65058.385.peg.923	65058.419.peg.145	65058.361.peg.543	65058.362.peg.145	65058.363.peg.545	65058.420.peg.547	65058.421.peg.144	65058.428.peg.144	65058.426.peg.144	65058.313.peg.543	65058.314.peg.1260	65058.315.peg.316	65058.316.peg.544	2320456.3.peg.551	65058.317.peg.540	65058.318.peg.502	65058.319.peg.501	65058.320.peg.146	65058.321.peg.245	65058.322.peg.493	65058.323.peg.500	65058.229.peg.151	2320431.9.peg.1795	2320431.16.peg.1797	2320431.10.peg.1798	2320431.17.peg.1799	2320431.13.peg.1799	2320431.14.peg.1796	2320431.12.peg.1798	2320431.15.peg.1799	65058.241.peg.222
	212	65058.435.peg.285	65058.432.peg.264	2320431.4.peg.543	2320431.3.peg.551	65058.401.peg.541	65058.405.peg.144	65058.406.peg.500	65058.410.peg.541	65058.411.peg.501	65058.370.peg.145	65058.373.peg.145	65058.374.peg.148	65058.375.peg.148	65058.376.peg.541	65058.437.peg.126	65058.385.peg.924	65058.419.peg.146	65058.361.peg.542	65058.362.peg.146	65058.363.peg.544	65058.420.peg.546	65058.421.peg.145	65058.428.peg.145	65058.426.peg.145	65058.313.peg.542	65058.314.peg.1261	65058.315.peg.315	65058.316.peg.543	2320456.3.peg.550	65058.317.peg.539	65058.318.peg.501	65058.319.peg.500	65058.320.peg.147	65058.321.peg.244	65058.322.peg.492	65058.323.peg.499	65058.229.peg.152	2320431.9.peg.1794	2320431.16.peg.1796	2320431.10.peg.1797	2320431.17.peg.1798	2320431.13.peg.1798	2320431.14.peg.1795	2320431.12.peg.1797	2320431.15.peg.1798	65058.241.peg.223
	213	65058.435.peg.286	65058.432.peg.265	2320431.4.peg.542	2320431.3.peg.550	65058.401.peg.540	65058.405.peg.145	65058.406.peg.499	65058.410.peg.540	65058.411.peg.500	65058.370.peg.146	65058.373.peg.146	65058.374.peg.149	65058.375.peg.149	65058.376.peg.540	65058.437.peg.127	65058.385.peg.925	65058.419.peg.147	65058.361.peg.541	65058.362.peg.147	65058.363.peg.543	65058.420.peg.545	65058.421.peg.146	65058.428.peg.146	65058.426.peg.146	65058.313.peg.541	65058.314.peg.1262	65058.315.peg.314	65058.316.peg.542	2320456.3.peg.549	65058.317.peg.538	65058.318.peg.500	65058.319.peg.499	65058.320.peg.148	65058.321.peg.243	65058.322.peg.491	65058.323.peg.498	65058.229.peg.153	2320431.9.peg.1793	2320431.16.peg.1795	2320431.10.peg.1796	2320431.17.peg.1797	2320431.13.peg.1797	2320431.14.peg.1794	2320431.12.peg.1796	2320431.15.peg.1797	65058.241.peg.224
	214	65058.435.peg.287	65058.432.peg.266	2320431.4.peg.541	2320431.3.peg.549	65058.401.peg.539	65058.405.peg.146	65058.406.peg.498	65058.410.peg.539	65058.411.peg.499	65058.370.peg.147	65058.373.peg.147	65058.374.peg.150	65058.375.peg.150	65058.376.peg.539	65058.437.peg.128	65058.385.peg.926	65058.419.peg.148	65058.361.peg.540	65058.362.peg.148	65058.363.peg.542	65058.420.peg.544	65058.421.peg.147	65058.428.peg.147	65058.426.peg.147	65058.313.peg.540	65058.314.peg.1263	65058.315.peg.313	65058.316.peg.541	2320456.3.peg.548	65058.317.peg.537	65058.318.peg.499	65058.319.peg.498	65058.320.peg.149	65058.321.peg.242	65058.322.peg.490	65058.323.peg.497	65058.229.peg.154	2320431.9.peg.1792	2320431.16.peg.1794	2320431.10.peg.1795	2320431.17.peg.1796	2320431.13.peg.1796	2320431.14.peg.1793	2320431.12.peg.1795	2320431.15.peg.1796	65058.241.peg.225
	215	65058.435.peg.288	65058.432.peg.267	2320431.4.peg.540	2320431.3.peg.548	65058.401.peg.538	65058.405.peg.147	65058.406.peg.497	65058.410.peg.538	65058.411.peg.498	65058.370.peg.148	65058.373.peg.148	65058.374.peg.151	65058.375.peg.151	65058.376.peg.538	65058.437.peg.129	65058.385.peg.927	65058.419.peg.149	65058.361.peg.539	65058.362.peg.149	65058.363.peg.541	65058.420.peg.543	65058.421.peg.148	65058.428.peg.148	65058.426.peg.148	65058.313.peg.539	65058.314.peg.1264	65058.315.peg.312	65058.316.peg.540	2320456.3.peg.547	65058.317.peg.536	65058.318.peg.498	65058.319.peg.497	65058.320.peg.150	65058.321.peg.241	65058.322.peg.489	65058.323.peg.496	65058.229.peg.155	2320431.9.peg.1791	2320431.16.peg.1793	2320431.10.peg.1794	2320431.17.peg.1795	2320431.13.peg.1795	2320431.14.peg.1792	2320431.12.peg.1794	2320431.15.peg.1795	65058.241.peg.226
	216	65058.435.peg.289	65058.432.peg.268	2320431.4.peg.539	2320431.3.peg.547	65058.401.peg.537	65058.405.peg.148	65058.406.peg.496	65058.410.peg.537	65058.411.peg.497	65058.370.peg.149	65058.373.peg.149	65058.374.peg.152	65058.375.peg.152	65058.376.peg.537	65058.437.peg.130	65058.385.peg.928	65058.419.peg.150	65058.361.peg.538	65058.362.peg.150	65058.363.peg.540	65058.420.peg.542	65058.421.peg.149	65058.428.peg.149	65058.426.peg.149	65058.313.peg.538	65058.314.peg.1265	65058.315.peg.311	65058.316.peg.539	2320456.3.peg.546	65058.317.peg.535	65058.318.peg.497	65058.319.peg.496	65058.320.peg.151	65058.321.peg.240	65058.322.peg.488	65058.323.peg.495	65058.229.peg.156	2320431.9.peg.1790	2320431.16.peg.1792	2320431.10.peg.1793	2320431.17.peg.1794	2320431.13.peg.1794	2320431.14.peg.1791	2320431.12.peg.1793	2320431.15.peg.1794	65058.241.peg.227
	217	65058.435.peg.290	65058.432.peg.270	2320431.4.peg.537	2320431.3.peg.545	65058.401.peg.535	65058.405.peg.150	65058.406.peg.494	65058.410.peg.535	65058.411.peg.495	65058.370.peg.151	65058.373.peg.151	65058.374.peg.154	65058.375.peg.154	65058.376.peg.535	65058.437.peg.132	65058.385.peg.930	65058.419.peg.151	65058.361.peg.536	65058.362.peg.152	65058.363.peg.538	65058.420.peg.540	65058.421.peg.151	65058.428.peg.151	65058.426.peg.151	65058.313.peg.536	65058.314.peg.1267	65058.315.peg.309	65058.316.peg.537	2320456.3.peg.544	65058.317.peg.534	65058.318.peg.495	65058.319.peg.494	65058.320.peg.153	65058.321.peg.238	65058.322.peg.486	65058.323.peg.493	65058.229.peg.158	2320431.9.peg.1788	2320431.16.peg.1790	2320431.10.peg.1792	2320431.17.peg.1792	2320431.13.peg.1792	2320431.14.peg.1789	2320431.12.peg.1791	2320431.15.peg.1792	65058.241.peg.229
	218	65058.435.peg.291	65058.432.peg.271	2320431.4.peg.536	2320431.3.peg.544	65058.401.peg.534	65058.405.peg.151	65058.406.peg.493	65058.410.peg.534	65058.411.peg.494	65058.370.peg.152	65058.373.peg.152	65058.374.peg.155	65058.375.peg.155	65058.376.peg.534	65058.437.peg.133	65058.385.peg.931	65058.419.peg.152	65058.361.peg.535	65058.362.peg.153	65058.363.peg.537	65058.420.peg.539	65058.421.peg.152	65058.428.peg.152	65058.426.peg.152	65058.313.peg.535	65058.314.peg.1268	65058.315.peg.308	65058.316.peg.536	2320456.3.peg.543	65058.317.peg.533	65058.318.peg.494	65058.319.peg.493	65058.320.peg.154	65058.321.peg.237	65058.322.peg.485	65058.323.peg.492	65058.229.peg.159	2320431.9.peg.1787	2320431.16.peg.1789	2320431.10.peg.1791	2320431.17.peg.1791	2320431.13.peg.1791	2320431.14.peg.1788	2320431.12.peg.1790	2320431.15.peg.1791	65058.241.peg.230
	219	65058.435.peg.292	65058.432.peg.272	2320431.4.peg.535	2320431.3.peg.543	65058.401.peg.533	65058.405.peg.152	65058.406.peg.492	65058.410.peg.533	65058.411.peg.493	65058.370.peg.153	65058.373.peg.153	65058.374.peg.156	65058.375.peg.156	65058.376.peg.533	65058.437.peg.134	65058.385.peg.932	65058.419.peg.153	65058.361.peg.534	65058.362.peg.154	65058.363.peg.536	65058.420.peg.538	65058.421.peg.153	65058.428.peg.153	65058.426.peg.153	65058.313.peg.534	65058.314.peg.1269	65058.315.peg.307	65058.316.peg.535	2320456.3.peg.542	65058.317.peg.532	65058.318.peg.493	65058.319.peg.492	65058.320.peg.155	65058.321.peg.236	65058.322.peg.484	65058.323.peg.491	65058.229.peg.160	2320431.9.peg.1786	2320431.16.peg.1788	2320431.10.peg.1790	2320431.17.peg.1790	2320431.13.peg.1790	2320431.14.peg.1787	2320431.12.peg.1789	2320431.15.peg.1790	65058.241.peg.231
	220	65058.435.peg.293	65058.432.peg.273	2320431.4.peg.534	2320431.3.peg.542	65058.401.peg.532	65058.405.peg.153	65058.406.peg.491	65058.410.peg.532	65058.411.peg.492	65058.370.peg.154	65058.373.peg.154	65058.374.peg.157	65058.375.peg.157	65058.376.peg.532	65058.437.peg.135	65058.385.peg.933	65058.419.peg.154	65058.361.peg.533	65058.362.peg.155	65058.363.peg.535	65058.420.peg.537	65058.421.peg.154	65058.428.peg.154	65058.426.peg.154	65058.313.peg.533	65058.314.peg.1270	65058.315.peg.306	65058.316.peg.534	2320456.3.peg.541	65058.317.peg.531	65058.318.peg.492	65058.319.peg.491	65058.320.peg.156	65058.321.peg.235	65058.322.peg.483	65058.323.peg.490	65058.229.peg.161	2320431.9.peg.1785	2320431.16.peg.1787	2320431.10.peg.1789	2320431.17.peg.1789	2320431.13.peg.1789	2320431.14.peg.1786	2320431.12.peg.1788	2320431.15.peg.1789	65058.241.peg.232
	221	65058.435.peg.294	65058.432.peg.274	2320431.4.peg.533	2320431.3.peg.541	65058.401.peg.531	65058.405.peg.154	65058.406.peg.490	65058.410.peg.531	65058.411.peg.491	65058.370.peg.155	65058.373.peg.155	65058.374.peg.158	65058.375.peg.158	65058.376.peg.531	65058.437.peg.136	65058.385.peg.934	65058.419.peg.155	65058.361.peg.532	65058.362.peg.156	65058.363.peg.534	65058.420.peg.536	65058.421.peg.155	65058.428.peg.155	65058.426.peg.155	65058.313.peg.532	65058.314.peg.1271	65058.315.peg.305	65058.316.peg.533	2320456.3.peg.540	65058.317.peg.530	65058.318.peg.491	65058.319.peg.490	65058.320.peg.157	65058.321.peg.234	65058.322.peg.482	65058.323.peg.489	65058.229.peg.162	2320431.9.peg.1784	2320431.16.peg.1786	2320431.10.peg.1788	2320431.17.peg.1788	2320431.13.peg.1788	2320431.14.peg.1785	2320431.12.peg.1787	2320431.15.peg.1788	65058.241.peg.233
	222	65058.435.peg.295	65058.432.peg.275	2320431.4.peg.532	2320431.3.peg.540	65058.401.peg.530	65058.405.peg.155	65058.406.peg.489	65058.410.peg.530	65058.411.peg.490	65058.370.peg.156	65058.373.peg.156	65058.374.peg.159	65058.375.peg.159	65058.376.peg.530	65058.437.peg.137	65058.385.peg.935	65058.419.peg.156	65058.361.peg.531	65058.362.peg.157	65058.363.peg.533	65058.420.peg.535	65058.421.peg.156	65058.428.peg.156	65058.426.peg.156	65058.313.peg.531	65058.314.peg.1272	65058.315.peg.304	65058.316.peg.532	2320456.3.peg.539	65058.317.peg.529	65058.318.peg.490	65058.319.peg.489	65058.320.peg.158	65058.321.peg.233	65058.322.peg.481	65058.323.peg.488	65058.229.peg.163	2320431.9.peg.1783	2320431.16.peg.1785	2320431.10.peg.1787	2320431.17.peg.1787	2320431.13.peg.1787	2320431.14.peg.1784	2320431.12.peg.1786	2320431.15.peg.1787	65058.241.peg.234
	223	65058.435.peg.296	65058.432.peg.276	2320431.4.peg.531	2320431.3.peg.539	65058.401.peg.529	65058.405.peg.156	65058.406.peg.488	65058.410.peg.529	65058.411.peg.489	65058.370.peg.157	65058.373.peg.157	65058.374.peg.160	65058.375.peg.160	65058.376.peg.529	65058.437.peg.138	65058.385.peg.936	65058.419.peg.157	65058.361.peg.530	65058.362.peg.158	65058.363.peg.532	65058.420.peg.534	65058.421.peg.157	65058.428.peg.157	65058.426.peg.157	65058.313.peg.530	65058.314.peg.1273	65058.315.peg.303	65058.316.peg.531	2320456.3.peg.538	65058.317.peg.528	65058.318.peg.489	65058.319.peg.488	65058.320.peg.159	65058.321.peg.232	65058.322.peg.480	65058.323.peg.487	65058.229.peg.164	2320431.9.peg.1782	2320431.16.peg.1784	2320431.10.peg.1786	2320431.17.peg.1786	2320431.13.peg.1786	2320431.14.peg.1783	2320431.12.peg.1785	2320431.15.peg.1786	65058.241.peg.235
	224	65058.435.peg.297	65058.432.peg.277	2320431.4.peg.530	2320431.3.peg.538	65058.401.peg.528	65058.405.peg.157	65058.406.peg.487	65058.410.peg.528	65058.411.peg.488	65058.370.peg.158	65058.373.peg.158	65058.374.peg.161	65058.375.peg.161	65058.376.peg.528	65058.437.peg.139	65058.385.peg.937	65058.419.peg.158	65058.361.peg.529	65058.362.peg.159	65058.363.peg.531	65058.420.peg.533	65058.421.peg.158	65058.428.peg.158	65058.426.peg.158	65058.313.peg.529	65058.314.peg.1274	65058.315.peg.302	65058.316.peg.530	2320456.3.peg.537	65058.317.peg.527	65058.318.peg.488	65058.319.peg.487	65058.320.peg.160	65058.321.peg.231	65058.322.peg.479	65058.323.peg.486	65058.229.peg.165	2320431.9.peg.1781	2320431.16.peg.1783	2320431.10.peg.1785	2320431.17.peg.1785	2320431.13.peg.1785	2320431.14.peg.1782	2320431.12.peg.1784	2320431.15.peg.1785	65058.241.peg.236
	225	65058.435.peg.298	65058.432.peg.278	2320431.4.peg.529	2320431.3.peg.537	65058.401.peg.527	65058.405.peg.158	65058.406.peg.486	65058.410.peg.527	65058.411.peg.487	65058.370.peg.159	65058.373.peg.159	65058.374.peg.162	65058.375.peg.162	65058.376.peg.527	65058.437.peg.140	65058.385.peg.938	65058.419.peg.159	65058.361.peg.528	65058.362.peg.160	65058.363.peg.530	65058.420.peg.532	65058.421.peg.159	65058.428.peg.159	65058.426.peg.159	65058.313.peg.528	65058.314.peg.1275	65058.315.peg.301	65058.316.peg.529	2320456.3.peg.536	65058.317.peg.526	65058.318.peg.487	65058.319.peg.486	65058.320.peg.161	65058.321.peg.230	65058.322.peg.478	65058.323.peg.485	65058.229.peg.166	2320431.9.peg.1780	2320431.16.peg.1782	2320431.10.peg.1784	2320431.17.peg.1784	2320431.13.peg.1784	2320431.14.peg.1781	2320431.12.peg.1783	2320431.15.peg.1784	65058.241.peg.237
	226	65058.435.peg.299	65058.432.peg.279	2320431.4.peg.528	2320431.3.peg.536	65058.401.peg.526	65058.405.peg.159	65058.406.peg.485	65058.410.peg.526	65058.411.peg.486	65058.370.peg.160	65058.373.peg.160	65058.374.peg.163	65058.375.peg.163	65058.376.peg.526	65058.437.peg.141	65058.385.peg.939	65058.419.peg.160	65058.361.peg.527	65058.362.peg.161	65058.363.peg.529	65058.420.peg.531	65058.421.peg.160	65058.428.peg.160	65058.426.peg.160	65058.313.peg.527	65058.314.peg.2537	65058.315.peg.300	65058.316.peg.528	2320456.3.peg.535	65058.317.peg.525	65058.318.peg.486	65058.319.peg.485	65058.320.peg.162	65058.321.peg.229	65058.322.peg.477	65058.323.peg.484	65058.229.peg.167	2320431.9.peg.1779	2320431.16.peg.1781	2320431.10.peg.1783	2320431.17.peg.1783	2320431.13.peg.1783	2320431.14.peg.1780	2320431.12.peg.1782	2320431.15.peg.1783	65058.241.peg.238
	227	65058.435.peg.300	65058.432.peg.280	2320431.4.peg.527	2320431.3.peg.535	65058.401.peg.525	65058.405.peg.160	65058.406.peg.484	65058.410.peg.525	65058.411.peg.485	65058.370.peg.161	65058.373.peg.161	65058.374.peg.164	65058.375.peg.164	65058.376.peg.525	65058.437.peg.142	65058.385.peg.940	65058.419.peg.161	65058.361.peg.526	65058.362.peg.162	65058.363.peg.528	65058.420.peg.530	65058.421.peg.161	65058.428.peg.161	65058.426.peg.161	65058.313.peg.526	65058.314.peg.2538	65058.315.peg.299	65058.316.peg.527	2320456.3.peg.534	65058.317.peg.524	65058.318.peg.485	65058.319.peg.484	65058.320.peg.163	65058.321.peg.228	65058.322.peg.476	65058.323.peg.483	65058.229.peg.168	2320431.9.peg.1778	2320431.16.peg.1780	2320431.10.peg.1782	2320431.17.peg.1782	2320431.13.peg.1782	2320431.14.peg.1779	2320431.12.peg.1781	2320431.15.peg.1782	65058.241.peg.239
	228	65058.435.peg.301	65058.432.peg.281	2320431.4.peg.526	2320431.3.peg.534	65058.401.peg.524	65058.405.peg.161	65058.406.peg.483	65058.410.peg.524	65058.411.peg.484	65058.370.peg.162	65058.373.peg.162	65058.374.peg.165	65058.375.peg.165	65058.376.peg.524	65058.437.peg.143	65058.385.peg.941	65058.419.peg.162	65058.361.peg.525	65058.362.peg.163	65058.363.peg.527	65058.420.peg.529	65058.421.peg.162	65058.428.peg.162	65058.426.peg.162	65058.313.peg.525	65058.314.peg.2539	65058.315.peg.298	65058.316.peg.526	2320456.3.peg.533	65058.317.peg.523	65058.318.peg.484	65058.319.peg.483	65058.320.peg.164	65058.321.peg.227	65058.322.peg.475	65058.323.peg.482	65058.229.peg.169	2320431.9.peg.1777	2320431.16.peg.1779	2320431.10.peg.1781	2320431.17.peg.1781	2320431.13.peg.1781	2320431.14.peg.1778	2320431.12.peg.1780	2320431.15.peg.1781	65058.241.peg.240
	229	65058.435.peg.302	65058.432.peg.282	2320431.4.peg.525	2320431.3.peg.533	65058.401.peg.523	65058.405.peg.162	65058.406.peg.482	65058.410.peg.523	65058.411.peg.483	65058.370.peg.163	65058.373.peg.163	65058.374.peg.166	65058.375.peg.166	65058.376.peg.523	65058.437.peg.144	65058.385.peg.942	65058.419.peg.163	65058.361.peg.524	65058.362.peg.164	65058.363.peg.526	65058.420.peg.528	65058.421.peg.163	65058.428.peg.163	65058.426.peg.163	65058.313.peg.524	65058.314.peg.2540	65058.315.peg.297	65058.316.peg.525	2320456.3.peg.532	65058.317.peg.522	65058.318.peg.483	65058.319.peg.482	65058.320.peg.165	65058.321.peg.226	65058.322.peg.474	65058.323.peg.481	65058.229.peg.170	2320431.9.peg.1776	2320431.16.peg.1778	2320431.10.peg.1780	2320431.17.peg.1780	2320431.13.peg.1780	2320431.14.peg.1777	2320431.12.peg.1779	2320431.15.peg.1780	65058.241.peg.241
	230	65058.435.peg.303	65058.432.peg.283	2320431.4.peg.524	2320431.3.peg.532	65058.401.peg.522	65058.405.peg.163	65058.406.peg.481	65058.410.peg.522	65058.411.peg.482	65058.370.peg.164	65058.373.peg.164	65058.374.peg.167	65058.375.peg.167	65058.376.peg.522	65058.437.peg.145	65058.385.peg.943	65058.419.peg.164	65058.361.peg.523	65058.362.peg.165	65058.363.peg.525	65058.420.peg.527	65058.421.peg.164	65058.428.peg.164	65058.426.peg.164	65058.313.peg.523	65058.314.peg.2541	65058.315.peg.296	65058.316.peg.524	2320456.3.peg.531	65058.317.peg.521	65058.318.peg.482	65058.319.peg.481	65058.320.peg.166	65058.321.peg.225	65058.322.peg.473	65058.323.peg.480	65058.229.peg.171	2320431.9.peg.1775	2320431.16.peg.1777	2320431.10.peg.1779	2320431.17.peg.1779	2320431.13.peg.1779	2320431.14.peg.1776	2320431.12.peg.1778	2320431.15.peg.1779	65058.241.peg.242
	231	65058.435.peg.304	65058.432.peg.284	2320431.4.peg.523	2320431.3.peg.531	65058.401.peg.521	65058.405.peg.164	65058.406.peg.480	65058.410.peg.521	65058.411.peg.481	65058.370.peg.165	65058.373.peg.165	65058.374.peg.168	65058.375.peg.168	65058.376.peg.521	65058.437.peg.146	65058.385.peg.944	65058.419.peg.165	65058.361.peg.522	65058.362.peg.166	65058.363.peg.524	65058.420.peg.526	65058.421.peg.165	65058.428.peg.165	65058.426.peg.165	65058.313.peg.522	65058.314.peg.2542	65058.315.peg.295	65058.316.peg.523	2320456.3.peg.530	65058.317.peg.520	65058.318.peg.481	65058.319.peg.480	65058.320.peg.167	65058.321.peg.224	65058.322.peg.472	65058.323.peg.479	65058.229.peg.172	2320431.9.peg.1774	2320431.16.peg.1776	2320431.10.peg.1778	2320431.17.peg.1778	2320431.13.peg.1778	2320431.14.peg.1775	2320431.12.peg.1777	2320431.15.peg.1778	65058.241.peg.243
	232	65058.435.peg.305	65058.432.peg.285	2320431.4.peg.522	2320431.3.peg.529	65058.401.peg.520	65058.405.peg.165	65058.406.peg.479	65058.410.peg.520	65058.411.peg.480	65058.370.peg.166	65058.373.peg.166	65058.374.peg.169	65058.375.peg.169	65058.376.peg.520	65058.437.peg.147	65058.385.peg.945	65058.419.peg.166	65058.361.peg.521	65058.362.peg.167	65058.363.peg.523	65058.420.peg.525	65058.421.peg.166	65058.428.peg.166	65058.426.peg.166	65058.313.peg.521	65058.314.peg.2543	65058.315.peg.294	65058.316.peg.522	2320456.3.peg.528	65058.317.peg.519	65058.318.peg.480	65058.319.peg.479	65058.320.peg.168	65058.321.peg.223	65058.322.peg.471	65058.323.peg.478	65058.229.peg.174	2320431.9.peg.1773	2320431.16.peg.1775	2320431.10.peg.1777	2320431.17.peg.1777	2320431.13.peg.1777	2320431.14.peg.1774	2320431.12.peg.1776	2320431.15.peg.1777	65058.241.peg.245
	233	65058.435.peg.306	65058.432.peg.286	2320431.4.peg.521	2320431.3.peg.528	65058.401.peg.519	65058.405.peg.166	65058.406.peg.478	65058.410.peg.519	65058.411.peg.479	65058.370.peg.167	65058.373.peg.167	65058.374.peg.170	65058.375.peg.170	65058.376.peg.519	65058.437.peg.148	65058.385.peg.946	65058.419.peg.167	65058.361.peg.520	65058.362.peg.168	65058.363.peg.522	65058.420.peg.524	65058.421.peg.167	65058.428.peg.167	65058.426.peg.167	65058.313.peg.520	65058.314.peg.2544	65058.315.peg.293	65058.316.peg.521	2320456.3.peg.527	65058.317.peg.518	65058.318.peg.479	65058.319.peg.478	65058.320.peg.169	65058.321.peg.222	65058.322.peg.470	65058.323.peg.477	65058.229.peg.175	2320431.9.peg.1772	2320431.16.peg.1774	2320431.10.peg.1776	2320431.17.peg.1776	2320431.13.peg.1776	2320431.14.peg.1773	2320431.12.peg.1775	2320431.15.peg.1776	65058.241.peg.246
	234	65058.435.peg.307	65058.432.peg.287	2320431.4.peg.520	2320431.3.peg.527	65058.401.peg.518	65058.405.peg.167	65058.406.peg.477	65058.410.peg.518	65058.411.peg.478	65058.370.peg.168	65058.373.peg.168	65058.374.peg.171	65058.375.peg.171	65058.376.peg.518	65058.437.peg.149	65058.385.peg.947	65058.419.peg.168	65058.361.peg.519	65058.362.peg.169	65058.363.peg.521	65058.420.peg.523	65058.421.peg.168	65058.428.peg.168	65058.426.peg.168	65058.313.peg.519	65058.314.peg.2545	65058.315.peg.292	65058.316.peg.520	2320456.3.peg.526	65058.317.peg.517	65058.318.peg.478	65058.319.peg.477	65058.320.peg.170	65058.321.peg.221	65058.322.peg.469	65058.323.peg.476	65058.229.peg.176	2320431.9.peg.1771	2320431.16.peg.1773	2320431.10.peg.1775	2320431.17.peg.1775	2320431.13.peg.1775	2320431.14.peg.1772	2320431.12.peg.1774	2320431.15.peg.1775	65058.241.peg.247
	235	65058.435.peg.308	65058.432.peg.288	2320431.4.peg.519	2320431.3.peg.526	65058.401.peg.517	65058.405.peg.168	65058.406.peg.476	65058.410.peg.517	65058.411.peg.477	65058.370.peg.169	65058.373.peg.169	65058.374.peg.172	65058.375.peg.172	65058.376.peg.517	65058.437.peg.150	65058.385.peg.948	65058.419.peg.169	65058.361.peg.518	65058.362.peg.170	65058.363.peg.520	65058.420.peg.522	65058.421.peg.169	65058.428.peg.169	65058.426.peg.169	65058.313.peg.518	65058.314.peg.2546	65058.315.peg.291	65058.316.peg.519	2320456.3.peg.525	65058.317.peg.516	65058.318.peg.477	65058.319.peg.476	65058.320.peg.171	65058.321.peg.220	65058.322.peg.468	65058.323.peg.475	65058.229.peg.177	2320431.9.peg.1770	2320431.16.peg.1772	2320431.10.peg.1774	2320431.17.peg.1774	2320431.13.peg.1774	2320431.14.peg.1771	2320431.12.peg.1773	2320431.15.peg.1774	65058.241.peg.248
	236	65058.435.peg.309	65058.432.peg.289	2320431.4.peg.518	2320431.3.peg.525	65058.401.peg.516	65058.405.peg.170	65058.406.peg.475	65058.410.peg.516	65058.411.peg.476	65058.370.peg.170	65058.373.peg.170	65058.374.peg.173	65058.375.peg.173	65058.376.peg.516	65058.437.peg.151	65058.385.peg.949	65058.419.peg.171	65058.361.peg.517	65058.362.peg.171	65058.363.peg.518	65058.420.peg.521	65058.421.peg.170	65058.428.peg.170	65058.426.peg.170	65058.313.peg.517	65058.314.peg.2547	65058.315.peg.290	65058.316.peg.518	2320456.3.peg.524	65058.317.peg.514	65058.318.peg.475	65058.319.peg.475	65058.320.peg.172	65058.321.peg.219	65058.322.peg.467	65058.323.peg.474	65058.229.peg.178	2320431.9.peg.1769	2320431.16.peg.1771	2320431.10.peg.1773	2320431.17.peg.1773	2320431.13.peg.1773	2320431.14.peg.1770	2320431.12.peg.1772	2320431.15.peg.1773	65058.241.peg.249
	237	65058.435.peg.310	65058.432.peg.290	2320431.4.peg.517	2320431.3.peg.524	65058.401.peg.515	65058.405.peg.171	65058.406.peg.474	65058.410.peg.515	65058.411.peg.475	65058.370.peg.171	65058.373.peg.171	65058.374.peg.174	65058.375.peg.174	65058.376.peg.515	65058.437.peg.152	65058.385.peg.950	65058.419.peg.172	65058.361.peg.516	65058.362.peg.172	65058.363.peg.517	65058.420.peg.520	65058.421.peg.171	65058.428.peg.171	65058.426.peg.171	65058.313.peg.516	65058.314.peg.2548	65058.315.peg.289	65058.316.peg.517	2320456.3.peg.523	65058.317.peg.513	65058.318.peg.474	65058.319.peg.474	65058.320.peg.173	65058.321.peg.218	65058.322.peg.466	65058.323.peg.473	65058.229.peg.179	2320431.9.peg.1768	2320431.16.peg.1770	2320431.10.peg.1772	2320431.17.peg.1772	2320431.13.peg.1772	2320431.14.peg.1769	2320431.12.peg.1771	2320431.15.peg.1772	65058.241.peg.250
	238	65058.435.peg.317	65058.432.peg.297	2320431.4.peg.510	2320431.3.peg.517	65058.401.peg.508	65058.405.peg.178	65058.406.peg.467	65058.410.peg.508	65058.411.peg.468	65058.370.peg.178	65058.373.peg.178	65058.374.peg.181	65058.375.peg.181	65058.376.peg.508	65058.437.peg.159	65058.385.peg.465	65058.419.peg.179	65058.361.peg.509	65058.362.peg.179	65058.363.peg.510	65058.420.peg.513	65058.421.peg.178	65058.428.peg.178	65058.426.peg.178	65058.313.peg.509	65058.314.peg.1	65058.315.peg.282	65058.316.peg.510	2320456.3.peg.516	65058.317.peg.506	65058.318.peg.467	65058.319.peg.467	65058.320.peg.180	65058.321.peg.211	65058.322.peg.459	65058.323.peg.466	65058.229.peg.186	2320431.9.peg.1761	2320431.16.peg.1763	2320431.10.peg.1765	2320431.17.peg.1765	2320431.13.peg.1765	2320431.14.peg.1762	2320431.12.peg.1764	2320431.15.peg.1765	65058.241.peg.257
	239	65058.435.peg.318	65058.432.peg.298	2320431.4.peg.509	2320431.3.peg.516	65058.401.peg.507	65058.405.peg.179	65058.406.peg.466	65058.410.peg.507	65058.411.peg.467	65058.370.peg.179	65058.373.peg.179	65058.374.peg.182	65058.375.peg.182	65058.376.peg.507	65058.437.peg.160	65058.385.peg.464	65058.419.peg.180	65058.361.peg.508	65058.362.peg.180	65058.363.peg.509	65058.420.peg.512	65058.421.peg.179	65058.428.peg.179	65058.426.peg.179	65058.313.peg.508	65058.314.peg.2	65058.315.peg.281	65058.316.peg.509	2320456.3.peg.515	65058.317.peg.505	65058.318.peg.466	65058.319.peg.466	65058.320.peg.181	65058.321.peg.210	65058.322.peg.458	65058.323.peg.465	65058.229.peg.187	2320431.9.peg.1760	2320431.16.peg.1762	2320431.10.peg.1764	2320431.17.peg.1764	2320431.13.peg.1764	2320431.14.peg.1761	2320431.12.peg.1763	2320431.15.peg.1764	65058.241.peg.258
	240	65058.435.peg.319	65058.432.peg.299	2320431.4.peg.508	2320431.3.peg.515	65058.401.peg.506	65058.405.peg.180	65058.406.peg.465	65058.410.peg.506	65058.411.peg.466	65058.370.peg.180	65058.373.peg.180	65058.374.peg.183	65058.375.peg.183	65058.376.peg.506	65058.437.peg.161	65058.385.peg.463	65058.419.peg.181	65058.361.peg.507	65058.362.peg.181	65058.363.peg.508	65058.420.peg.511	65058.421.peg.180	65058.428.peg.180	65058.426.peg.180	65058.313.peg.507	65058.314.peg.3	65058.315.peg.280	65058.316.peg.508	2320456.3.peg.514	65058.317.peg.504	65058.318.peg.465	65058.319.peg.465	65058.320.peg.182	65058.321.peg.209	65058.322.peg.457	65058.323.peg.464	65058.229.peg.188	2320431.9.peg.1759	2320431.16.peg.1761	2320431.10.peg.1763	2320431.17.peg.1763	2320431.13.peg.1763	2320431.14.peg.1760	2320431.12.peg.1762	2320431.15.peg.1763	65058.241.peg.259
	241	65058.435.peg.320	65058.432.peg.300	2320431.4.peg.507	2320431.3.peg.514	65058.401.peg.505	65058.405.peg.181	65058.406.peg.464	65058.410.peg.505	65058.411.peg.465	65058.370.peg.181	65058.373.peg.181	65058.374.peg.184	65058.375.peg.184	65058.376.peg.505	65058.437.peg.162	65058.385.peg.462	65058.419.peg.182	65058.361.peg.506	65058.362.peg.182	65058.363.peg.507	65058.420.peg.510	65058.421.peg.181	65058.428.peg.181	65058.426.peg.181	65058.313.peg.506	65058.314.peg.4	65058.315.peg.279	65058.316.peg.507	2320456.3.peg.513	65058.317.peg.503	65058.318.peg.464	65058.319.peg.464	65058.320.peg.183	65058.321.peg.208	65058.322.peg.456	65058.323.peg.463	65058.229.peg.189	2320431.9.peg.1758	2320431.16.peg.1760	2320431.10.peg.1762	2320431.17.peg.1762	2320431.13.peg.1762	2320431.14.peg.1759	2320431.12.peg.1761	2320431.15.peg.1762	65058.241.peg.260
	242	65058.435.peg.321	65058.432.peg.301	2320431.4.peg.506	2320431.3.peg.513	65058.401.peg.504	65058.405.peg.182	65058.406.peg.463	65058.410.peg.504	65058.411.peg.464	65058.370.peg.182	65058.373.peg.182	65058.374.peg.185	65058.375.peg.185	65058.376.peg.504	65058.437.peg.163	65058.385.peg.461	65058.419.peg.183	65058.361.peg.505	65058.362.peg.183	65058.363.peg.506	65058.420.peg.509	65058.421.peg.182	65058.428.peg.182	65058.426.peg.182	65058.313.peg.505	65058.314.peg.5	65058.315.peg.278	65058.316.peg.506	2320456.3.peg.512	65058.317.peg.502	65058.318.peg.463	65058.319.peg.463	65058.320.peg.184	65058.321.peg.207	65058.322.peg.455	65058.323.peg.462	65058.229.peg.190	2320431.9.peg.1757	2320431.16.peg.1759	2320431.10.peg.1761	2320431.17.peg.1761	2320431.13.peg.1761	2320431.14.peg.1758	2320431.12.peg.1760	2320431.15.peg.1761	65058.241.peg.261
	243	65058.435.peg.322	65058.432.peg.302	2320431.4.peg.505	2320431.3.peg.512	65058.401.peg.503	65058.405.peg.183	65058.406.peg.462	65058.410.peg.503	65058.411.peg.463	65058.370.peg.183	65058.373.peg.183	65058.374.peg.186	65058.375.peg.186	65058.376.peg.503	65058.437.peg.164	65058.385.peg.460	65058.419.peg.184	65058.361.peg.504	65058.362.peg.184	65058.363.peg.505	65058.420.peg.508	65058.421.peg.183	65058.428.peg.183	65058.426.peg.183	65058.313.peg.504	65058.314.peg.6	65058.315.peg.277	65058.316.peg.505	2320456.3.peg.511	65058.317.peg.501	65058.318.peg.462	65058.319.peg.462	65058.320.peg.185	65058.321.peg.206	65058.322.peg.454	65058.323.peg.461	65058.229.peg.191	2320431.9.peg.1756	2320431.16.peg.1758	2320431.10.peg.1760	2320431.17.peg.1760	2320431.13.peg.1760	2320431.14.peg.1757	2320431.12.peg.1759	2320431.15.peg.1760	65058.241.peg.262
	244	65058.435.peg.323	65058.432.peg.303	2320431.4.peg.504	2320431.3.peg.511	65058.401.peg.502	65058.405.peg.184	65058.406.peg.461	65058.410.peg.502	65058.411.peg.462	65058.370.peg.184	65058.373.peg.184	65058.374.peg.187	65058.375.peg.187	65058.376.peg.502	65058.437.peg.165	65058.385.peg.459	65058.419.peg.185	65058.361.peg.503	65058.362.peg.185	65058.363.peg.504	65058.420.peg.507	65058.421.peg.184	65058.428.peg.184	65058.426.peg.184	65058.313.peg.503	65058.314.peg.7	65058.315.peg.276	65058.316.peg.504	2320456.3.peg.510	65058.317.peg.500	65058.318.peg.461	65058.319.peg.461	65058.320.peg.186	65058.321.peg.205	65058.322.peg.453	65058.323.peg.460	65058.229.peg.192	2320431.9.peg.1755	2320431.16.peg.1757	2320431.10.peg.1759	2320431.17.peg.1759	2320431.13.peg.1759	2320431.14.peg.1756	2320431.12.peg.1758	2320431.15.peg.1759	65058.241.peg.263
	245	65058.435.peg.324	65058.432.peg.304	2320431.4.peg.503	2320431.3.peg.510	65058.401.peg.501	65058.405.peg.185	65058.406.peg.460	65058.410.peg.501	65058.411.peg.461	65058.370.peg.185	65058.373.peg.185	65058.374.peg.188	65058.375.peg.188	65058.376.peg.501	65058.437.peg.166	65058.385.peg.458	65058.419.peg.186	65058.361.peg.502	65058.362.peg.186	65058.363.peg.503	65058.420.peg.506	65058.421.peg.185	65058.428.peg.185	65058.426.peg.185	65058.313.peg.502	65058.314.peg.8	65058.315.peg.275	65058.316.peg.503	2320456.3.peg.509	65058.317.peg.499	65058.318.peg.460	65058.319.peg.460	65058.320.peg.187	65058.321.peg.204	65058.322.peg.452	65058.323.peg.459	65058.229.peg.193	2320431.9.peg.1754	2320431.16.peg.1756	2320431.10.peg.1758	2320431.17.peg.1758	2320431.13.peg.1758	2320431.14.peg.1755	2320431.12.peg.1757	2320431.15.peg.1758	65058.241.peg.264
	246	65058.435.peg.325	65058.432.peg.305	2320431.4.peg.502	2320431.3.peg.509	65058.401.peg.500	65058.405.peg.186	65058.406.peg.459	65058.410.peg.500	65058.411.peg.460	65058.370.peg.186	65058.373.peg.186	65058.374.peg.189	65058.375.peg.189	65058.376.peg.500	65058.437.peg.167	65058.385.peg.457	65058.419.peg.187	65058.361.peg.501	65058.362.peg.187	65058.363.peg.502	65058.420.peg.505	65058.421.peg.186	65058.428.peg.186	65058.426.peg.186	65058.313.peg.501	65058.314.peg.9	65058.315.peg.274	65058.316.peg.502	2320456.3.peg.508	65058.317.peg.498	65058.318.peg.459	65058.319.peg.459	65058.320.peg.188	65058.321.peg.203	65058.322.peg.451	65058.323.peg.458	65058.229.peg.194	2320431.9.peg.1753	2320431.16.peg.1755	2320431.10.peg.1757	2320431.17.peg.1757	2320431.13.peg.1757	2320431.14.peg.1754	2320431.12.peg.1756	2320431.15.peg.1757	65058.241.peg.265
	247	65058.435.peg.326	65058.432.peg.306	2320431.4.peg.501	2320431.3.peg.508	65058.401.peg.499	65058.405.peg.187	65058.406.peg.458	65058.410.peg.499	65058.411.peg.459	65058.370.peg.187	65058.373.peg.187	65058.374.peg.190	65058.375.peg.190	65058.376.peg.499	65058.437.peg.168	65058.385.peg.456	65058.419.peg.188	65058.361.peg.500	65058.362.peg.188	65058.363.peg.501	65058.420.peg.504	65058.421.peg.187	65058.428.peg.187	65058.426.peg.187	65058.313.peg.500	65058.314.peg.10	65058.315.peg.273	65058.316.peg.501	2320456.3.peg.507	65058.317.peg.497	65058.318.peg.458	65058.319.peg.458	65058.320.peg.189	65058.321.peg.202	65058.322.peg.450	65058.323.peg.457	65058.229.peg.195	2320431.9.peg.1752	2320431.16.peg.1754	2320431.10.peg.1756	2320431.17.peg.1756	2320431.13.peg.1756	2320431.14.peg.1753	2320431.12.peg.1755	2320431.15.peg.1756	65058.241.peg.266
	248	65058.435.peg.327	65058.432.peg.307	2320431.4.peg.500	2320431.3.peg.507	65058.401.peg.498	65058.405.peg.188	65058.406.peg.457	65058.410.peg.498	65058.411.peg.458	65058.370.peg.188	65058.373.peg.188	65058.374.peg.191	65058.375.peg.191	65058.376.peg.498	65058.437.peg.169	65058.385.peg.455	65058.419.peg.189	65058.361.peg.499	65058.362.peg.189	65058.363.peg.500	65058.420.peg.503	65058.421.peg.188	65058.428.peg.188	65058.426.peg.188	65058.313.peg.499	65058.314.peg.11	65058.315.peg.272	65058.316.peg.500	2320456.3.peg.506	65058.317.peg.496	65058.318.peg.457	65058.319.peg.457	65058.320.peg.190	65058.321.peg.201	65058.322.peg.449	65058.323.peg.456	65058.229.peg.196	2320431.9.peg.1751	2320431.16.peg.1753	2320431.10.peg.1755	2320431.17.peg.1755	2320431.13.peg.1755	2320431.14.peg.1752	2320431.12.peg.1754	2320431.15.peg.1755	65058.241.peg.267
	249	65058.435.peg.328	65058.432.peg.308	2320431.4.peg.499	2320431.3.peg.506	65058.401.peg.497	65058.405.peg.189	65058.406.peg.456	65058.410.peg.497	65058.411.peg.457	65058.370.peg.189	65058.373.peg.189	65058.374.peg.192	65058.375.peg.192	65058.376.peg.497	65058.437.peg.170	65058.385.peg.454	65058.419.peg.190	65058.361.peg.498	65058.362.peg.190	65058.363.peg.499	65058.420.peg.502	65058.421.peg.189	65058.428.peg.189	65058.426.peg.189	65058.313.peg.498	65058.314.peg.12	65058.315.peg.271	65058.316.peg.499	2320456.3.peg.505	65058.317.peg.495	65058.318.peg.456	65058.319.peg.456	65058.320.peg.191	65058.321.peg.200	65058.322.peg.448	65058.323.peg.455	65058.229.peg.197	2320431.9.peg.1750	2320431.16.peg.1752	2320431.10.peg.1754	2320431.17.peg.1754	2320431.13.peg.1754	2320431.14.peg.1751	2320431.12.peg.1753	2320431.15.peg.1754	65058.241.peg.268
	250	65058.435.peg.329	65058.432.peg.309	2320431.4.peg.498	2320431.3.peg.505	65058.401.peg.496	65058.405.peg.190	65058.406.peg.455	65058.410.peg.496	65058.411.peg.456	65058.370.peg.190	65058.373.peg.190	65058.374.peg.193	65058.375.peg.193	65058.376.peg.496	65058.437.peg.171	65058.385.peg.453	65058.419.peg.191	65058.361.peg.497	65058.362.peg.191	65058.363.peg.498	65058.420.peg.501	65058.421.peg.190	65058.428.peg.190	65058.426.peg.190	65058.313.peg.497	65058.314.peg.13	65058.315.peg.270	65058.316.peg.498	2320456.3.peg.504	65058.317.peg.494	65058.318.peg.455	65058.319.peg.455	65058.320.peg.192	65058.321.peg.199	65058.322.peg.447	65058.323.peg.454	65058.229.peg.198	2320431.9.peg.1749	2320431.16.peg.1751	2320431.10.peg.1753	2320431.17.peg.1753	2320431.13.peg.1753	2320431.14.peg.1750	2320431.12.peg.1752	2320431.15.peg.1753	65058.241.peg.269
	251	65058.435.peg.330	65058.432.peg.310	2320431.4.peg.497	2320431.3.peg.504	65058.401.peg.495	65058.405.peg.191	65058.406.peg.454	65058.410.peg.495	65058.411.peg.455	65058.370.peg.191	65058.373.peg.191	65058.374.peg.194	65058.375.peg.194	65058.376.peg.495	65058.437.peg.172	65058.385.peg.452	65058.419.peg.192	65058.361.peg.496	65058.362.peg.192	65058.363.peg.497	65058.420.peg.500	65058.421.peg.191	65058.428.peg.191	65058.426.peg.191	65058.313.peg.496	65058.314.peg.14	65058.315.peg.269	65058.316.peg.497	2320456.3.peg.503	65058.317.peg.493	65058.318.peg.454	65058.319.peg.454	65058.320.peg.193	65058.321.peg.198	65058.322.peg.446	65058.323.peg.453	65058.229.peg.199	2320431.9.peg.1748	2320431.16.peg.1750	2320431.10.peg.1752	2320431.17.peg.1752	2320431.13.peg.1752	2320431.14.peg.1749	2320431.12.peg.1751	2320431.15.peg.1752	65058.241.peg.270
	252	65058.435.peg.331	65058.432.peg.311	2320431.4.peg.496	2320431.3.peg.503	65058.401.peg.494	65058.405.peg.192	65058.406.peg.453	65058.410.peg.494	65058.411.peg.454	65058.370.peg.192	65058.373.peg.192	65058.374.peg.195	65058.375.peg.195	65058.376.peg.494	65058.437.peg.173	65058.385.peg.451	65058.419.peg.193	65058.361.peg.495	65058.362.peg.193	65058.363.peg.496	65058.420.peg.499	65058.421.peg.192	65058.428.peg.192	65058.426.peg.192	65058.313.peg.495	65058.314.peg.15	65058.315.peg.268	65058.316.peg.496	2320456.3.peg.502	65058.317.peg.492	65058.318.peg.453	65058.319.peg.453	65058.320.peg.194	65058.321.peg.197	65058.322.peg.445	65058.323.peg.452	65058.229.peg.200	2320431.9.peg.1747	2320431.16.peg.1749	2320431.10.peg.1751	2320431.17.peg.1751	2320431.13.peg.1751	2320431.14.peg.1748	2320431.12.peg.1750	2320431.15.peg.1751	65058.241.peg.271
	253	65058.435.peg.332	65058.432.peg.312	2320431.4.peg.495	2320431.3.peg.502	65058.401.peg.493	65058.405.peg.193	65058.406.peg.452	65058.410.peg.493	65058.411.peg.453	65058.370.peg.193	65058.373.peg.193	65058.374.peg.196	65058.375.peg.196	65058.376.peg.493	65058.437.peg.174	65058.385.peg.450	65058.419.peg.194	65058.361.peg.494	65058.362.peg.194	65058.363.peg.495	65058.420.peg.498	65058.421.peg.193	65058.428.peg.193	65058.426.peg.193	65058.313.peg.494	65058.314.peg.16	65058.315.peg.267	65058.316.peg.495	2320456.3.peg.501	65058.317.peg.491	65058.318.peg.452	65058.319.peg.452	65058.320.peg.195	65058.321.peg.196	65058.322.peg.444	65058.323.peg.451	65058.229.peg.201	2320431.9.peg.1746	2320431.16.peg.1748	2320431.10.peg.1750	2320431.17.peg.1750	2320431.13.peg.1750	2320431.14.peg.1747	2320431.12.peg.1749	2320431.15.peg.1750	65058.241.peg.272
	254	65058.435.peg.333	65058.432.peg.313	2320431.4.peg.494	2320431.3.peg.501	65058.401.peg.492	65058.405.peg.194	65058.406.peg.451	65058.410.peg.492	65058.411.peg.452	65058.370.peg.194	65058.373.peg.194	65058.374.peg.197	65058.375.peg.197	65058.376.peg.492	65058.437.peg.175	65058.385.peg.449	65058.419.peg.195	65058.361.peg.493	65058.362.peg.195	65058.363.peg.494	65058.420.peg.497	65058.421.peg.194	65058.428.peg.194	65058.426.peg.194	65058.313.peg.493	65058.314.peg.17	65058.315.peg.266	65058.316.peg.494	2320456.3.peg.500	65058.317.peg.490	65058.318.peg.451	65058.319.peg.451	65058.320.peg.196	65058.321.peg.195	65058.322.peg.443	65058.323.peg.450	65058.229.peg.202	2320431.9.peg.1745	2320431.16.peg.1747	2320431.10.peg.1749	2320431.17.peg.1749	2320431.13.peg.1749	2320431.14.peg.1746	2320431.12.peg.1748	2320431.15.peg.1749	65058.241.peg.273
	255	65058.435.peg.334	65058.432.peg.314	2320431.4.peg.493	2320431.3.peg.500	65058.401.peg.491	65058.405.peg.195	65058.406.peg.450	65058.410.peg.491	65058.411.peg.451	65058.370.peg.195	65058.373.peg.195	65058.374.peg.198	65058.375.peg.198	65058.376.peg.491	65058.437.peg.176	65058.385.peg.448	65058.419.peg.196	65058.361.peg.492	65058.362.peg.196	65058.363.peg.493	65058.420.peg.496	65058.421.peg.195	65058.428.peg.195	65058.426.peg.195	65058.313.peg.492	65058.314.peg.18	65058.315.peg.265	65058.316.peg.493	2320456.3.peg.499	65058.317.peg.489	65058.318.peg.450	65058.319.peg.450	65058.320.peg.197	65058.321.peg.194	65058.322.peg.442	65058.323.peg.449	65058.229.peg.203	2320431.9.peg.1744	2320431.16.peg.1746	2320431.10.peg.1748	2320431.17.peg.1748	2320431.13.peg.1748	2320431.14.peg.1745	2320431.12.peg.1747	2320431.15.peg.1748	65058.241.peg.274
	256	65058.435.peg.335	65058.432.peg.315	2320431.4.peg.492	2320431.3.peg.499	65058.401.peg.490	65058.405.peg.196	65058.406.peg.449	65058.410.peg.490	65058.411.peg.450	65058.370.peg.196	65058.373.peg.196	65058.374.peg.199	65058.375.peg.199	65058.376.peg.490	65058.437.peg.177	65058.385.peg.447	65058.419.peg.197	65058.361.peg.491	65058.362.peg.197	65058.363.peg.492	65058.420.peg.495	65058.421.peg.196	65058.428.peg.196	65058.426.peg.196	65058.313.peg.491	65058.314.peg.19	65058.315.peg.264	65058.316.peg.492	2320456.3.peg.498	65058.317.peg.488	65058.318.peg.449	65058.319.peg.449	65058.320.peg.198	65058.321.peg.193	65058.322.peg.441	65058.323.peg.448	65058.229.peg.204	2320431.9.peg.1743	2320431.16.peg.1745	2320431.10.peg.1747	2320431.17.peg.1747	2320431.13.peg.1747	2320431.14.peg.1744	2320431.12.peg.1746	2320431.15.peg.1747	65058.241.peg.275
	257	65058.435.peg.336	65058.432.peg.316	2320431.4.peg.491	2320431.3.peg.498	65058.401.peg.489	65058.405.peg.197	65058.406.peg.448	65058.410.peg.489	65058.411.peg.449	65058.370.peg.197	65058.373.peg.197	65058.374.peg.200	65058.375.peg.200	65058.376.peg.489	65058.437.peg.178	65058.385.peg.446	65058.419.peg.198	65058.361.peg.490	65058.362.peg.198	65058.363.peg.491	65058.420.peg.494	65058.421.peg.197	65058.428.peg.197	65058.426.peg.197	65058.313.peg.490	65058.314.peg.20	65058.315.peg.263	65058.316.peg.491	2320456.3.peg.497	65058.317.peg.487	65058.318.peg.448	65058.319.peg.448	65058.320.peg.199	65058.321.peg.192	65058.322.peg.440	65058.323.peg.447	65058.229.peg.205	2320431.9.peg.1742	2320431.16.peg.1744	2320431.10.peg.1746	2320431.17.peg.1746	2320431.13.peg.1746	2320431.14.peg.1743	2320431.12.peg.1745	2320431.15.peg.1746	65058.241.peg.276
	258	65058.435.peg.337	65058.432.peg.317	2320431.4.peg.490	2320431.3.peg.497	65058.401.peg.488	65058.405.peg.198	65058.406.peg.447	65058.410.peg.488	65058.411.peg.448	65058.370.peg.198	65058.373.peg.198	65058.374.peg.201	65058.375.peg.201	65058.376.peg.488	65058.437.peg.179	65058.385.peg.445	65058.419.peg.199	65058.361.peg.489	65058.362.peg.199	65058.363.peg.490	65058.420.peg.493	65058.421.peg.198	65058.428.peg.198	65058.426.peg.198	65058.313.peg.489	65058.314.peg.21	65058.315.peg.262	65058.316.peg.490	2320456.3.peg.496	65058.317.peg.486	65058.318.peg.447	65058.319.peg.447	65058.320.peg.200	65058.321.peg.191	65058.322.peg.439	65058.323.peg.446	65058.229.peg.206	2320431.9.peg.1741	2320431.16.peg.1743	2320431.10.peg.1745	2320431.17.peg.1745	2320431.13.peg.1745	2320431.14.peg.1742	2320431.12.peg.1744	2320431.15.peg.1745	65058.241.peg.277
	259	65058.435.peg.338	65058.432.peg.318	2320431.4.peg.489	2320431.3.peg.496	65058.401.peg.487	65058.405.peg.199	65058.406.peg.446	65058.410.peg.487	65058.411.peg.447	65058.370.peg.199	65058.373.peg.199	65058.374.peg.202	65058.375.peg.202	65058.376.peg.487	65058.437.peg.180	65058.385.peg.444	65058.419.peg.200	65058.361.peg.488	65058.362.peg.200	65058.363.peg.489	65058.420.peg.492	65058.421.peg.199	65058.428.peg.199	65058.426.peg.199	65058.313.peg.488	65058.314.peg.22	65058.315.peg.261	65058.316.peg.489	2320456.3.peg.495	65058.317.peg.485	65058.318.peg.446	65058.319.peg.446	65058.320.peg.201	65058.321.peg.190	65058.322.peg.438	65058.323.peg.445	65058.229.peg.207	2320431.9.peg.1740	2320431.16.peg.1742	2320431.10.peg.1744	2320431.17.peg.1744	2320431.13.peg.1744	2320431.14.peg.1741	2320431.12.peg.1743	2320431.15.peg.1744	65058.241.peg.278
	260	65058.435.peg.339	65058.432.peg.319	2320431.4.peg.488	2320431.3.peg.495	65058.401.peg.486	65058.405.peg.200	65058.406.peg.445	65058.410.peg.486	65058.411.peg.446	65058.370.peg.200	65058.373.peg.200	65058.374.peg.203	65058.375.peg.203	65058.376.peg.486	65058.437.peg.181	65058.385.peg.443	65058.419.peg.201	65058.361.peg.487	65058.362.peg.201	65058.363.peg.488	65058.420.peg.491	65058.421.peg.200	65058.428.peg.200	65058.426.peg.200	65058.313.peg.487	65058.314.peg.23	65058.315.peg.260	65058.316.peg.488	2320456.3.peg.494	65058.317.peg.484	65058.318.peg.445	65058.319.peg.445	65058.320.peg.202	65058.321.peg.189	65058.322.peg.437	65058.323.peg.444	65058.229.peg.208	2320431.9.peg.1739	2320431.16.peg.1741	2320431.10.peg.1743	2320431.17.peg.1743	2320431.13.peg.1743	2320431.14.peg.1740	2320431.12.peg.1742	2320431.15.peg.1743	65058.241.peg.279
	261	65058.435.peg.340	65058.432.peg.320	2320431.4.peg.487	2320431.3.peg.494	65058.401.peg.485	65058.405.peg.201	65058.406.peg.444	65058.410.peg.485	65058.411.peg.445	65058.370.peg.201	65058.373.peg.201	65058.374.peg.204	65058.375.peg.204	65058.376.peg.485	65058.437.peg.182	65058.385.peg.442	65058.419.peg.202	65058.361.peg.486	65058.362.peg.202	65058.363.peg.487	65058.420.peg.490	65058.421.peg.201	65058.428.peg.201	65058.426.peg.201	65058.313.peg.486	65058.314.peg.24	65058.315.peg.259	65058.316.peg.487	2320456.3.peg.493	65058.317.peg.483	65058.318.peg.444	65058.319.peg.444	65058.320.peg.203	65058.321.peg.188	65058.322.peg.436	65058.323.peg.443	65058.229.peg.209	2320431.9.peg.1738	2320431.16.peg.1740	2320431.10.peg.1742	2320431.17.peg.1742	2320431.13.peg.1742	2320431.14.peg.1739	2320431.12.peg.1741	2320431.15.peg.1742	65058.241.peg.280
	262	65058.435.peg.341	65058.432.peg.321	2320431.4.peg.486	2320431.3.peg.493	65058.401.peg.484	65058.405.peg.202	65058.406.peg.443	65058.410.peg.484	65058.411.peg.444	65058.370.peg.202	65058.373.peg.202	65058.374.peg.205	65058.375.peg.205	65058.376.peg.484	65058.437.peg.183	65058.385.peg.441	65058.419.peg.203	65058.361.peg.485	65058.362.peg.203	65058.363.peg.486	65058.420.peg.489	65058.421.peg.202	65058.428.peg.202	65058.426.peg.202	65058.313.peg.485	65058.314.peg.25	65058.315.peg.258	65058.316.peg.486	2320456.3.peg.492	65058.317.peg.482	65058.318.peg.443	65058.319.peg.443	65058.320.peg.204	65058.321.peg.187	65058.322.peg.435	65058.323.peg.442	65058.229.peg.210	2320431.9.peg.1737	2320431.16.peg.1739	2320431.10.peg.1741	2320431.17.peg.1741	2320431.13.peg.1741	2320431.14.peg.1738	2320431.12.peg.1740	2320431.15.peg.1741	65058.241.peg.281
	263	65058.435.peg.342	65058.432.peg.322	2320431.4.peg.485	2320431.3.peg.492	65058.401.peg.483	65058.405.peg.203	65058.406.peg.442	65058.410.peg.483	65058.411.peg.443	65058.370.peg.203	65058.373.peg.203	65058.374.peg.206	65058.375.peg.206	65058.376.peg.483	65058.437.peg.184	65058.385.peg.440	65058.419.peg.204	65058.361.peg.484	65058.362.peg.204	65058.363.peg.485	65058.420.peg.488	65058.421.peg.203	65058.428.peg.203	65058.426.peg.203	65058.313.peg.484	65058.314.peg.26	65058.315.peg.257	65058.316.peg.485	2320456.3.peg.491	65058.317.peg.481	65058.318.peg.442	65058.319.peg.442	65058.320.peg.205	65058.321.peg.186	65058.322.peg.434	65058.323.peg.441	65058.229.peg.211	2320431.9.peg.1736	2320431.16.peg.1738	2320431.10.peg.1740	2320431.17.peg.1740	2320431.13.peg.1740	2320431.14.peg.1737	2320431.12.peg.1739	2320431.15.peg.1740	65058.241.peg.282
	264	65058.435.peg.343	65058.432.peg.323	2320431.4.peg.484	2320431.3.peg.491	65058.401.peg.482	65058.405.peg.204	65058.406.peg.441	65058.410.peg.482	65058.411.peg.442	65058.370.peg.204	65058.373.peg.204	65058.374.peg.207	65058.375.peg.207	65058.376.peg.482	65058.437.peg.185	65058.385.peg.439	65058.419.peg.205	65058.361.peg.483	65058.362.peg.205	65058.363.peg.484	65058.420.peg.487	65058.421.peg.204	65058.428.peg.204	65058.426.peg.204	65058.313.peg.483	65058.314.peg.27	65058.315.peg.256	65058.316.peg.484	2320456.3.peg.490	65058.317.peg.480	65058.318.peg.441	65058.319.peg.441	65058.320.peg.206	65058.321.peg.185	65058.322.peg.433	65058.323.peg.440	65058.229.peg.212	2320431.9.peg.1735	2320431.16.peg.1737	2320431.10.peg.1739	2320431.17.peg.1739	2320431.13.peg.1739	2320431.14.peg.1736	2320431.12.peg.1738	2320431.15.peg.1739	65058.241.peg.283
	265	65058.435.peg.344	65058.432.peg.324	2320431.4.peg.483	2320431.3.peg.490	65058.401.peg.481	65058.405.peg.205	65058.406.peg.440	65058.410.peg.481	65058.411.peg.441	65058.370.peg.205	65058.373.peg.205	65058.374.peg.208	65058.375.peg.208	65058.376.peg.481	65058.437.peg.186	65058.385.peg.438	65058.419.peg.206	65058.361.peg.482	65058.362.peg.206	65058.363.peg.483	65058.420.peg.486	65058.421.peg.205	65058.428.peg.205	65058.426.peg.205	65058.313.peg.482	65058.314.peg.28	65058.315.peg.255	65058.316.peg.483	2320456.3.peg.489	65058.317.peg.479	65058.318.peg.440	65058.319.peg.440	65058.320.peg.207	65058.321.peg.184	65058.322.peg.432	65058.323.peg.439	65058.229.peg.213	2320431.9.peg.1734	2320431.16.peg.1736	2320431.10.peg.1738	2320431.17.peg.1738	2320431.13.peg.1738	2320431.14.peg.1735	2320431.12.peg.1737	2320431.15.peg.1738	65058.241.peg.284
	266	65058.435.peg.345	65058.432.peg.325	2320431.4.peg.482	2320431.3.peg.489	65058.401.peg.480	65058.405.peg.206	65058.406.peg.439	65058.410.peg.480	65058.411.peg.440	65058.370.peg.206	65058.373.peg.206	65058.374.peg.209	65058.375.peg.209	65058.376.peg.480	65058.437.peg.187	65058.385.peg.437	65058.419.peg.207	65058.361.peg.481	65058.362.peg.207	65058.363.peg.482	65058.420.peg.485	65058.421.peg.206	65058.428.peg.206	65058.426.peg.206	65058.313.peg.481	65058.314.peg.29	65058.315.peg.254	65058.316.peg.482	2320456.3.peg.488	65058.317.peg.478	65058.318.peg.439	65058.319.peg.439	65058.320.peg.208	65058.321.peg.183	65058.322.peg.431	65058.323.peg.438	65058.229.peg.214	2320431.9.peg.1733	2320431.16.peg.1735	2320431.10.peg.1737	2320431.17.peg.1737	2320431.13.peg.1737	2320431.14.peg.1734	2320431.12.peg.1736	2320431.15.peg.1737	65058.241.peg.285
	267	65058.435.peg.346	65058.432.peg.326	2320431.4.peg.481	2320431.3.peg.488	65058.401.peg.479	65058.405.peg.207	65058.406.peg.438	65058.410.peg.479	65058.411.peg.439	65058.370.peg.207	65058.373.peg.207	65058.374.peg.210	65058.375.peg.210	65058.376.peg.479	65058.437.peg.188	65058.385.peg.436	65058.419.peg.208	65058.361.peg.480	65058.362.peg.208	65058.363.peg.481	65058.420.peg.484	65058.421.peg.207	65058.428.peg.207	65058.426.peg.207	65058.313.peg.480	65058.314.peg.30	65058.315.peg.253	65058.316.peg.481	2320456.3.peg.487	65058.317.peg.477	65058.318.peg.438	65058.319.peg.438	65058.320.peg.209	65058.321.peg.182	65058.322.peg.430	65058.323.peg.437	65058.229.peg.215	2320431.9.peg.1732	2320431.16.peg.1734	2320431.10.peg.1736	2320431.17.peg.1736	2320431.13.peg.1736	2320431.14.peg.1733	2320431.12.peg.1735	2320431.15.peg.1736	65058.241.peg.286
	268	65058.435.peg.347	65058.432.peg.327	2320431.4.peg.480	2320431.3.peg.487	65058.401.peg.478	65058.405.peg.208	65058.406.peg.437	65058.410.peg.478	65058.411.peg.438	65058.370.peg.208	65058.373.peg.208	65058.374.peg.211	65058.375.peg.211	65058.376.peg.478	65058.437.peg.189	65058.385.peg.435	65058.419.peg.209	65058.361.peg.479	65058.362.peg.209	65058.363.peg.480	65058.420.peg.483	65058.421.peg.208	65058.428.peg.208	65058.426.peg.208	65058.313.peg.479	65058.314.peg.31	65058.315.peg.252	65058.316.peg.480	2320456.3.peg.486	65058.317.peg.476	65058.318.peg.437	65058.319.peg.437	65058.320.peg.210	65058.321.peg.181	65058.322.peg.429	65058.323.peg.436	65058.229.peg.216	2320431.9.peg.1731	2320431.16.peg.1733	2320431.10.peg.1735	2320431.17.peg.1735	2320431.13.peg.1735	2320431.14.peg.1732	2320431.12.peg.1734	2320431.15.peg.1735	65058.241.peg.287
	269	65058.435.peg.348	65058.432.peg.328	2320431.4.peg.479	2320431.3.peg.486	65058.401.peg.477	65058.405.peg.209	65058.406.peg.436	65058.410.peg.477	65058.411.peg.437	65058.370.peg.209	65058.373.peg.209	65058.374.peg.212	65058.375.peg.212	65058.376.peg.477	65058.437.peg.190	65058.385.peg.434	65058.419.peg.210	65058.361.peg.478	65058.362.peg.210	65058.363.peg.479	65058.420.peg.482	65058.421.peg.209	65058.428.peg.209	65058.426.peg.209	65058.313.peg.478	65058.314.peg.32	65058.315.peg.251	65058.316.peg.479	2320456.3.peg.485	65058.317.peg.475	65058.318.peg.436	65058.319.peg.436	65058.320.peg.211	65058.321.peg.180	65058.322.peg.428	65058.323.peg.435	65058.229.peg.217	2320431.9.peg.1730	2320431.16.peg.1732	2320431.10.peg.1734	2320431.17.peg.1734	2320431.13.peg.1734	2320431.14.peg.1731	2320431.12.peg.1733	2320431.15.peg.1734	65058.241.peg.288
	270	65058.435.peg.349	65058.432.peg.329	2320431.4.peg.478	2320431.3.peg.485	65058.401.peg.476	65058.405.peg.210	65058.406.peg.435	65058.410.peg.476	65058.411.peg.436	65058.370.peg.210	65058.373.peg.210	65058.374.peg.213	65058.375.peg.213	65058.376.peg.476	65058.437.peg.191	65058.385.peg.433	65058.419.peg.211	65058.361.peg.477	65058.362.peg.211	65058.363.peg.478	65058.420.peg.481	65058.421.peg.210	65058.428.peg.210	65058.426.peg.210	65058.313.peg.477	65058.314.peg.33	65058.315.peg.250	65058.316.peg.478	2320456.3.peg.484	65058.317.peg.474	65058.318.peg.435	65058.319.peg.435	65058.320.peg.212	65058.321.peg.179	65058.322.peg.427	65058.323.peg.434	65058.229.peg.218	2320431.9.peg.1729	2320431.16.peg.1731	2320431.10.peg.1733	2320431.17.peg.1733	2320431.13.peg.1733	2320431.14.peg.1730	2320431.12.peg.1732	2320431.15.peg.1733	65058.241.peg.289
	271	65058.435.peg.350	65058.432.peg.330	2320431.4.peg.477	2320431.3.peg.484	65058.401.peg.475	65058.405.peg.211	65058.406.peg.434	65058.410.peg.475	65058.411.peg.435	65058.370.peg.211	65058.373.peg.211	65058.374.peg.214	65058.375.peg.214	65058.376.peg.475	65058.437.peg.192	65058.385.peg.432	65058.419.peg.212	65058.361.peg.476	65058.362.peg.212	65058.363.peg.477	65058.420.peg.480	65058.421.peg.211	65058.428.peg.211	65058.426.peg.211	65058.313.peg.476	65058.314.peg.34	65058.315.peg.249	65058.316.peg.477	2320456.3.peg.483	65058.317.peg.473	65058.318.peg.434	65058.319.peg.434	65058.320.peg.213	65058.321.peg.178	65058.322.peg.426	65058.323.peg.433	65058.229.peg.219	2320431.9.peg.1728	2320431.16.peg.1730	2320431.10.peg.1732	2320431.17.peg.1732	2320431.13.peg.1732	2320431.14.peg.1729	2320431.12.peg.1731	2320431.15.peg.1732	65058.241.peg.290
	272	65058.435.peg.352	65058.432.peg.332	2320431.4.peg.475	2320431.3.peg.482	65058.401.peg.474	65058.405.peg.212	65058.406.peg.433	65058.410.peg.474	65058.411.peg.434	65058.370.peg.212	65058.373.peg.212	65058.374.peg.215	65058.375.peg.215	65058.376.peg.474	65058.437.peg.193	65058.385.peg.431	65058.419.peg.213	65058.361.peg.475	65058.362.peg.213	65058.363.peg.476	65058.420.peg.479	65058.421.peg.212	65058.428.peg.212	65058.426.peg.212	65058.313.peg.475	65058.314.peg.35	65058.315.peg.248	65058.316.peg.476	2320456.3.peg.481	65058.317.peg.472	65058.318.peg.433	65058.319.peg.433	65058.320.peg.214	65058.321.peg.177	65058.322.peg.425	65058.323.peg.432	65058.229.peg.221	2320431.9.peg.1727	2320431.16.peg.1729	2320431.10.peg.1731	2320431.17.peg.1731	2320431.13.peg.1731	2320431.14.peg.1728	2320431.12.peg.1730	2320431.15.peg.1731	65058.241.peg.292
	273	65058.435.peg.353	65058.432.peg.333	2320431.4.peg.474	2320431.3.peg.481	65058.401.peg.473	65058.405.peg.213	65058.406.peg.432	65058.410.peg.473	65058.411.peg.433	65058.370.peg.213	65058.373.peg.213	65058.374.peg.216	65058.375.peg.216	65058.376.peg.473	65058.437.peg.194	65058.385.peg.430	65058.419.peg.214	65058.361.peg.474	65058.362.peg.214	65058.363.peg.475	65058.420.peg.478	65058.421.peg.213	65058.428.peg.213	65058.426.peg.213	65058.313.peg.474	65058.314.peg.36	65058.315.peg.247	65058.316.peg.475	2320456.3.peg.480	65058.317.peg.471	65058.318.peg.432	65058.319.peg.432	65058.320.peg.215	65058.321.peg.176	65058.322.peg.424	65058.323.peg.431	65058.229.peg.222	2320431.9.peg.1726	2320431.16.peg.1728	2320431.10.peg.1730	2320431.17.peg.1730	2320431.13.peg.1730	2320431.14.peg.1727	2320431.12.peg.1729	2320431.15.peg.1730	65058.241.peg.293
	274	65058.435.peg.355	65058.432.peg.335	2320431.4.peg.473	2320431.3.peg.480	65058.401.peg.472	65058.405.peg.215	65058.406.peg.431	65058.410.peg.472	65058.411.peg.432	65058.370.peg.215	65058.373.peg.215	65058.374.peg.218	65058.375.peg.218	65058.376.peg.472	65058.437.peg.196	65058.385.peg.429	65058.419.peg.216	65058.361.peg.473	65058.362.peg.216	65058.363.peg.474	65058.420.peg.477	65058.421.peg.215	65058.428.peg.215	65058.426.peg.215	65058.313.peg.473	65058.314.peg.38	65058.315.peg.246	65058.316.peg.474	2320456.3.peg.479	65058.317.peg.470	65058.318.peg.431	65058.319.peg.431	65058.320.peg.217	65058.321.peg.175	65058.322.peg.423	65058.323.peg.430	65058.229.peg.224	2320431.9.peg.1725	2320431.16.peg.1727	2320431.10.peg.1729	2320431.17.peg.1729	2320431.13.peg.1729	2320431.14.peg.1726	2320431.12.peg.1728	2320431.15.peg.1729	65058.241.peg.295
	275	65058.435.peg.356	65058.432.peg.336	2320431.4.peg.472	2320431.3.peg.479	65058.401.peg.471	65058.405.peg.216	65058.406.peg.430	65058.410.peg.471	65058.411.peg.431	65058.370.peg.216	65058.373.peg.216	65058.374.peg.219	65058.375.peg.219	65058.376.peg.471	65058.437.peg.197	65058.385.peg.428	65058.419.peg.217	65058.361.peg.472	65058.362.peg.217	65058.363.peg.473	65058.420.peg.476	65058.421.peg.216	65058.428.peg.216	65058.426.peg.216	65058.313.peg.472	65058.314.peg.39	65058.315.peg.245	65058.316.peg.473	2320456.3.peg.478	65058.317.peg.469	65058.318.peg.430	65058.319.peg.430	65058.320.peg.218	65058.321.peg.174	65058.322.peg.422	65058.323.peg.429	65058.229.peg.225	2320431.9.peg.1724	2320431.16.peg.1726	2320431.10.peg.1728	2320431.17.peg.1728	2320431.13.peg.1728	2320431.14.peg.1725	2320431.12.peg.1727	2320431.15.peg.1728	65058.241.peg.296
	276	65058.435.peg.357	65058.432.peg.337	2320431.4.peg.471	2320431.3.peg.478	65058.401.peg.470	65058.405.peg.217	65058.406.peg.429	65058.410.peg.470	65058.411.peg.430	65058.370.peg.217	65058.373.peg.217	65058.374.peg.220	65058.375.peg.220	65058.376.peg.470	65058.437.peg.198	65058.385.peg.427	65058.419.peg.218	65058.361.peg.471	65058.362.peg.218	65058.363.peg.472	65058.420.peg.475	65058.421.peg.217	65058.428.peg.217	65058.426.peg.217	65058.313.peg.471	65058.314.peg.40	65058.315.peg.244	65058.316.peg.472	2320456.3.peg.477	65058.317.peg.468	65058.318.peg.429	65058.319.peg.429	65058.320.peg.219	65058.321.peg.173	65058.322.peg.421	65058.323.peg.428	65058.229.peg.226	2320431.9.peg.1723	2320431.16.peg.1725	2320431.10.peg.1727	2320431.17.peg.1727	2320431.13.peg.1727	2320431.14.peg.1724	2320431.12.peg.1726	2320431.15.peg.1727	65058.241.peg.297
	277	65058.435.peg.358	65058.432.peg.338	2320431.4.peg.470	2320431.3.peg.477	65058.401.peg.469	65058.405.peg.218	65058.406.peg.428	65058.410.peg.469	65058.411.peg.429	65058.370.peg.218	65058.373.peg.218	65058.374.peg.221	65058.375.peg.221	65058.376.peg.469	65058.437.peg.199	65058.385.peg.426	65058.419.peg.219	65058.361.peg.470	65058.362.peg.219	65058.363.peg.471	65058.420.peg.474	65058.421.peg.218	65058.428.peg.218	65058.426.peg.218	65058.313.peg.470	65058.314.peg.41	65058.315.peg.243	65058.316.peg.471	2320456.3.peg.476	65058.317.peg.467	65058.318.peg.428	65058.319.peg.428	65058.320.peg.220	65058.321.peg.172	65058.322.peg.420	65058.323.peg.427	65058.229.peg.227	2320431.9.peg.1722	2320431.16.peg.1724	2320431.10.peg.1726	2320431.17.peg.1726	2320431.13.peg.1726	2320431.14.peg.1723	2320431.12.peg.1725	2320431.15.peg.1726	65058.241.peg.298
	278	65058.435.peg.360	65058.432.peg.340	2320431.4.peg.468	2320431.3.peg.475	65058.401.peg.467	65058.405.peg.220	65058.406.peg.426	65058.410.peg.467	65058.411.peg.427	65058.370.peg.220	65058.373.peg.220	65058.374.peg.223	65058.375.peg.223	65058.376.peg.467	65058.437.peg.201	65058.385.peg.424	65058.419.peg.221	65058.361.peg.468	65058.362.peg.221	65058.363.peg.469	65058.420.peg.472	65058.421.peg.220	65058.428.peg.220	65058.426.peg.220	65058.313.peg.468	65058.314.peg.43	65058.315.peg.241	65058.316.peg.469	2320456.3.peg.474	65058.317.peg.465	65058.318.peg.426	65058.319.peg.426	65058.320.peg.222	65058.321.peg.170	65058.322.peg.418	65058.323.peg.425	65058.229.peg.229	2320431.9.peg.1720	2320431.16.peg.1722	2320431.10.peg.1724	2320431.17.peg.1724	2320431.13.peg.1724	2320431.14.peg.1721	2320431.12.peg.1723	2320431.15.peg.1724	65058.241.peg.300
	279	65058.435.peg.361	65058.432.peg.341	2320431.4.peg.467	2320431.3.peg.474	65058.401.peg.466	65058.405.peg.221	65058.406.peg.425	65058.410.peg.466	65058.411.peg.426	65058.370.peg.221	65058.373.peg.221	65058.374.peg.224	65058.375.peg.224	65058.376.peg.466	65058.437.peg.202	65058.385.peg.423	65058.419.peg.222	65058.361.peg.467	65058.362.peg.222	65058.363.peg.468	65058.420.peg.471	65058.421.peg.221	65058.428.peg.221	65058.426.peg.221	65058.313.peg.467	65058.314.peg.44	65058.315.peg.240	65058.316.peg.468	2320456.3.peg.473	65058.317.peg.464	65058.318.peg.425	65058.319.peg.425	65058.320.peg.223	65058.321.peg.169	65058.322.peg.417	65058.323.peg.424	65058.229.peg.230	2320431.9.peg.1719	2320431.16.peg.1721	2320431.10.peg.1723	2320431.17.peg.1723	2320431.13.peg.1723	2320431.14.peg.1720	2320431.12.peg.1722	2320431.15.peg.1723	65058.241.peg.301
	280	65058.435.peg.362	65058.432.peg.342	2320431.4.peg.466	2320431.3.peg.473	65058.401.peg.465	65058.405.peg.222	65058.406.peg.424	65058.410.peg.465	65058.411.peg.425	65058.370.peg.222	65058.373.peg.222	65058.374.peg.225	65058.375.peg.225	65058.376.peg.465	65058.437.peg.203	65058.385.peg.422	65058.419.peg.223	65058.361.peg.466	65058.362.peg.223	65058.363.peg.467	65058.420.peg.470	65058.421.peg.222	65058.428.peg.222	65058.426.peg.222	65058.313.peg.466	65058.314.peg.45	65058.315.peg.239	65058.316.peg.467	2320456.3.peg.472	65058.317.peg.463	65058.318.peg.424	65058.319.peg.424	65058.320.peg.224	65058.321.peg.168	65058.322.peg.416	65058.323.peg.423	65058.229.peg.231	2320431.9.peg.1718	2320431.16.peg.1720	2320431.10.peg.1722	2320431.17.peg.1722	2320431.13.peg.1722	2320431.14.peg.1719	2320431.12.peg.1721	2320431.15.peg.1722	65058.241.peg.302
	281	65058.435.peg.363	65058.432.peg.343	2320431.4.peg.465	2320431.3.peg.472	65058.401.peg.464	65058.405.peg.223	65058.406.peg.423	65058.410.peg.464	65058.411.peg.424	65058.370.peg.223	65058.373.peg.223	65058.374.peg.226	65058.375.peg.226	65058.376.peg.464	65058.437.peg.204	65058.385.peg.421	65058.419.peg.224	65058.361.peg.465	65058.362.peg.224	65058.363.peg.466	65058.420.peg.469	65058.421.peg.223	65058.428.peg.223	65058.426.peg.223	65058.313.peg.465	65058.314.peg.46	65058.315.peg.238	65058.316.peg.466	2320456.3.peg.471	65058.317.peg.462	65058.318.peg.423	65058.319.peg.423	65058.320.peg.225	65058.321.peg.167	65058.322.peg.415	65058.323.peg.422	65058.229.peg.232	2320431.9.peg.1717	2320431.16.peg.1719	2320431.10.peg.1721	2320431.17.peg.1721	2320431.13.peg.1721	2320431.14.peg.1718	2320431.12.peg.1720	2320431.15.peg.1721	65058.241.peg.303
	282	65058.435.peg.364	65058.432.peg.344	2320431.4.peg.464	2320431.3.peg.471	65058.401.peg.463	65058.405.peg.224	65058.406.peg.422	65058.410.peg.463	65058.411.peg.423	65058.370.peg.224	65058.373.peg.224	65058.374.peg.227	65058.375.peg.227	65058.376.peg.463	65058.437.peg.205	65058.385.peg.420	65058.419.peg.225	65058.361.peg.464	65058.362.peg.225	65058.363.peg.465	65058.420.peg.468	65058.421.peg.224	65058.428.peg.224	65058.426.peg.224	65058.313.peg.464	65058.314.peg.47	65058.315.peg.237	65058.316.peg.465	2320456.3.peg.470	65058.317.peg.461	65058.318.peg.422	65058.319.peg.422	65058.320.peg.226	65058.321.peg.166	65058.322.peg.414	65058.323.peg.421	65058.229.peg.233	2320431.9.peg.1716	2320431.16.peg.1718	2320431.10.peg.1720	2320431.17.peg.1720	2320431.13.peg.1720	2320431.14.peg.1717	2320431.12.peg.1719	2320431.15.peg.1720	65058.241.peg.304
	283	65058.435.peg.365	65058.432.peg.345	2320431.4.peg.463	2320431.3.peg.470	65058.401.peg.462	65058.405.peg.225	65058.406.peg.421	65058.410.peg.462	65058.411.peg.422	65058.370.peg.225	65058.373.peg.225	65058.374.peg.228	65058.375.peg.228	65058.376.peg.462	65058.437.peg.206	65058.385.peg.419	65058.419.peg.226	65058.361.peg.463	65058.362.peg.226	65058.363.peg.464	65058.420.peg.467	65058.421.peg.225	65058.428.peg.225	65058.426.peg.225	65058.313.peg.463	65058.314.peg.48	65058.315.peg.236	65058.316.peg.464	2320456.3.peg.469	65058.317.peg.460	65058.318.peg.421	65058.319.peg.421	65058.320.peg.227	65058.321.peg.165	65058.322.peg.413	65058.323.peg.420	65058.229.peg.234	2320431.9.peg.1715	2320431.16.peg.1717	2320431.10.peg.1719	2320431.17.peg.1719	2320431.13.peg.1719	2320431.14.peg.1716	2320431.12.peg.1718	2320431.15.peg.1719	65058.241.peg.305
	284	65058.435.peg.366	65058.432.peg.346	2320431.4.peg.462	2320431.3.peg.469	65058.401.peg.461	65058.405.peg.226	65058.406.peg.420	65058.410.peg.461	65058.411.peg.421	65058.370.peg.226	65058.373.peg.226	65058.374.peg.229	65058.375.peg.229	65058.376.peg.461	65058.437.peg.207	65058.385.peg.418	65058.419.peg.227	65058.361.peg.462	65058.362.peg.227	65058.363.peg.463	65058.420.peg.466	65058.421.peg.226	65058.428.peg.226	65058.426.peg.226	65058.313.peg.462	65058.314.peg.49	65058.315.peg.235	65058.316.peg.463	2320456.3.peg.468	65058.317.peg.459	65058.318.peg.420	65058.319.peg.420	65058.320.peg.228	65058.321.peg.164	65058.322.peg.412	65058.323.peg.419	65058.229.peg.235	2320431.9.peg.1714	2320431.16.peg.1716	2320431.10.peg.1718	2320431.17.peg.1718	2320431.13.peg.1718	2320431.14.peg.1715	2320431.12.peg.1717	2320431.15.peg.1718	65058.241.peg.306
	285	65058.435.peg.367	65058.432.peg.347	2320431.4.peg.461	2320431.3.peg.468	65058.401.peg.460	65058.405.peg.227	65058.406.peg.419	65058.410.peg.460	65058.411.peg.420	65058.370.peg.227	65058.373.peg.227	65058.374.peg.230	65058.375.peg.230	65058.376.peg.460	65058.437.peg.208	65058.385.peg.417	65058.419.peg.228	65058.361.peg.461	65058.362.peg.228	65058.363.peg.462	65058.420.peg.465	65058.421.peg.227	65058.428.peg.227	65058.426.peg.227	65058.313.peg.461	65058.314.peg.50	65058.315.peg.234	65058.316.peg.462	2320456.3.peg.467	65058.317.peg.458	65058.318.peg.419	65058.319.peg.419	65058.320.peg.229	65058.321.peg.163	65058.322.peg.411	65058.323.peg.418	65058.229.peg.236	2320431.9.peg.1713	2320431.16.peg.1715	2320431.10.peg.1717	2320431.17.peg.1717	2320431.13.peg.1717	2320431.14.peg.1714	2320431.12.peg.1716	2320431.15.peg.1717	65058.241.peg.307
	286	65058.435.peg.368	65058.432.peg.348	2320431.4.peg.460	2320431.3.peg.467	65058.401.peg.459	65058.405.peg.228	65058.406.peg.418	65058.410.peg.459	65058.411.peg.419	65058.370.peg.228	65058.373.peg.228	65058.374.peg.231	65058.375.peg.231	65058.376.peg.459	65058.437.peg.209	65058.385.peg.416	65058.419.peg.229	65058.361.peg.460	65058.362.peg.229	65058.363.peg.461	65058.420.peg.464	65058.421.peg.228	65058.428.peg.228	65058.426.peg.228	65058.313.peg.460	65058.314.peg.51	65058.315.peg.233	65058.316.peg.461	2320456.3.peg.466	65058.317.peg.457	65058.318.peg.418	65058.319.peg.418	65058.320.peg.230	65058.321.peg.162	65058.322.peg.410	65058.323.peg.417	65058.229.peg.237	2320431.9.peg.1712	2320431.16.peg.1714	2320431.10.peg.1716	2320431.17.peg.1716	2320431.13.peg.1716	2320431.14.peg.1713	2320431.12.peg.1715	2320431.15.peg.1716	65058.241.peg.308
	287	65058.435.peg.369	65058.432.peg.349	2320431.4.peg.459	2320431.3.peg.466	65058.401.peg.458	65058.405.peg.229	65058.406.peg.417	65058.410.peg.458	65058.411.peg.418	65058.370.peg.229	65058.373.peg.229	65058.374.peg.232	65058.375.peg.232	65058.376.peg.458	65058.437.peg.210	65058.385.peg.415	65058.419.peg.230	65058.361.peg.459	65058.362.peg.230	65058.363.peg.460	65058.420.peg.463	65058.421.peg.229	65058.428.peg.229	65058.426.peg.229	65058.313.peg.459	65058.314.peg.52	65058.315.peg.232	65058.316.peg.460	2320456.3.peg.465	65058.317.peg.456	65058.318.peg.417	65058.319.peg.417	65058.320.peg.231	65058.321.peg.161	65058.322.peg.409	65058.323.peg.416	65058.229.peg.238	2320431.9.peg.1711	2320431.16.peg.1713	2320431.10.peg.1715	2320431.17.peg.1715	2320431.13.peg.1715	2320431.14.peg.1712	2320431.12.peg.1714	2320431.15.peg.1715	65058.241.peg.309
	288	65058.435.peg.371	65058.432.peg.350	2320431.4.peg.457	2320431.3.peg.464	65058.401.peg.456	65058.405.peg.231	65058.406.peg.415	65058.410.peg.456	65058.411.peg.416	65058.370.peg.231	65058.373.peg.231	65058.374.peg.234	65058.375.peg.234	65058.376.peg.456	65058.437.peg.212	65058.385.peg.413	65058.419.peg.231	65058.361.peg.457	65058.362.peg.231	65058.363.peg.458	65058.420.peg.461	65058.421.peg.231	65058.428.peg.231	65058.426.peg.231	65058.313.peg.457	65058.314.peg.54	65058.315.peg.230	65058.316.peg.458	2320456.3.peg.463	65058.317.peg.454	65058.318.peg.415	65058.319.peg.415	65058.320.peg.233	65058.321.peg.159	65058.322.peg.407	65058.323.peg.414	65058.229.peg.240	2320431.9.peg.1710	2320431.16.peg.1712	2320431.10.peg.1714	2320431.17.peg.1714	2320431.13.peg.1714	2320431.14.peg.1711	2320431.12.peg.1713	2320431.15.peg.1714	65058.241.peg.311
	289	65058.435.peg.372	65058.432.peg.351	2320431.4.peg.456	2320431.3.peg.463	65058.401.peg.455	65058.405.peg.232	65058.406.peg.414	65058.410.peg.455	65058.411.peg.415	65058.370.peg.232	65058.373.peg.232	65058.374.peg.235	65058.375.peg.235	65058.376.peg.455	65058.437.peg.213	65058.385.peg.412	65058.419.peg.232	65058.361.peg.456	65058.362.peg.232	65058.363.peg.457	65058.420.peg.460	65058.421.peg.232	65058.428.peg.232	65058.426.peg.232	65058.313.peg.456	65058.314.peg.55	65058.315.peg.229	65058.316.peg.457	2320456.3.peg.462	65058.317.peg.453	65058.318.peg.414	65058.319.peg.414	65058.320.peg.234	65058.321.peg.158	65058.322.peg.406	65058.323.peg.413	65058.229.peg.241	2320431.9.peg.1709	2320431.16.peg.1711	2320431.10.peg.1713	2320431.17.peg.1713	2320431.13.peg.1713	2320431.14.peg.1710	2320431.12.peg.1712	2320431.15.peg.1713	65058.241.peg.312
	290	65058.435.peg.373	65058.432.peg.352	2320431.4.peg.455	2320431.3.peg.462	65058.401.peg.454	65058.405.peg.233	65058.406.peg.413	65058.410.peg.454	65058.411.peg.414	65058.370.peg.233	65058.373.peg.233	65058.374.peg.236	65058.375.peg.236	65058.376.peg.454	65058.437.peg.214	65058.385.peg.411	65058.419.peg.233	65058.361.peg.455	65058.362.peg.233	65058.363.peg.456	65058.420.peg.459	65058.421.peg.233	65058.428.peg.233	65058.426.peg.233	65058.313.peg.455	65058.314.peg.56	65058.315.peg.228	65058.316.peg.456	2320456.3.peg.461	65058.317.peg.452	65058.318.peg.413	65058.319.peg.413	65058.320.peg.235	65058.321.peg.157	65058.322.peg.405	65058.323.peg.412	65058.229.peg.242	2320431.9.peg.1708	2320431.16.peg.1710	2320431.10.peg.1712	2320431.17.peg.1712	2320431.13.peg.1712	2320431.14.peg.1709	2320431.12.peg.1711	2320431.15.peg.1712	65058.241.peg.313
	291	65058.435.peg.374	65058.432.peg.353	2320431.4.peg.454	2320431.3.peg.461	65058.401.peg.453	65058.405.peg.234	65058.406.peg.412	65058.410.peg.453	65058.411.peg.413	65058.370.peg.234	65058.373.peg.234	65058.374.peg.237	65058.375.peg.237	65058.376.peg.453	65058.437.peg.215	65058.385.peg.410	65058.419.peg.234	65058.361.peg.454	65058.362.peg.234	65058.363.peg.455	65058.420.peg.458	65058.421.peg.234	65058.428.peg.234	65058.426.peg.234	65058.313.peg.454	65058.314.peg.57	65058.315.peg.227	65058.316.peg.455	2320456.3.peg.460	65058.317.peg.451	65058.318.peg.412	65058.319.peg.412	65058.320.peg.236	65058.321.peg.156	65058.322.peg.404	65058.323.peg.411	65058.229.peg.243	2320431.9.peg.1707	2320431.16.peg.1709	2320431.10.peg.1711	2320431.17.peg.1711	2320431.13.peg.1711	2320431.14.peg.1708	2320431.12.peg.1710	2320431.15.peg.1711	65058.241.peg.314
	292	65058.435.peg.375	65058.432.peg.354	2320431.4.peg.453	2320431.3.peg.460	65058.401.peg.452	65058.405.peg.235	65058.406.peg.411	65058.410.peg.452	65058.411.peg.412	65058.370.peg.235	65058.373.peg.235	65058.374.peg.238	65058.375.peg.238	65058.376.peg.452	65058.437.peg.216	65058.385.peg.409	65058.419.peg.235	65058.361.peg.453	65058.362.peg.235	65058.363.peg.454	65058.420.peg.457	65058.421.peg.235	65058.428.peg.235	65058.426.peg.235	65058.313.peg.453	65058.314.peg.58	65058.315.peg.226	65058.316.peg.454	2320456.3.peg.459	65058.317.peg.450	65058.318.peg.411	65058.319.peg.411	65058.320.peg.237	65058.321.peg.155	65058.322.peg.403	65058.323.peg.410	65058.229.peg.244	2320431.9.peg.1706	2320431.16.peg.1708	2320431.10.peg.1710	2320431.17.peg.1710	2320431.13.peg.1710	2320431.14.peg.1707	2320431.12.peg.1709	2320431.15.peg.1710	65058.241.peg.315
	293	65058.435.peg.376	65058.432.peg.355	2320431.4.peg.452	2320431.3.peg.459	65058.401.peg.451	65058.405.peg.236	65058.406.peg.410	65058.410.peg.451	65058.411.peg.411	65058.370.peg.236	65058.373.peg.236	65058.374.peg.239	65058.375.peg.239	65058.376.peg.451	65058.437.peg.217	65058.385.peg.408	65058.419.peg.236	65058.361.peg.452	65058.362.peg.236	65058.363.peg.453	65058.420.peg.456	65058.421.peg.236	65058.428.peg.236	65058.426.peg.236	65058.313.peg.452	65058.314.peg.59	65058.315.peg.225	65058.316.peg.453	2320456.3.peg.458	65058.317.peg.449	65058.318.peg.410	65058.319.peg.410	65058.320.peg.238	65058.321.peg.154	65058.322.peg.402	65058.323.peg.409	65058.229.peg.245	2320431.9.peg.1705	2320431.16.peg.1707	2320431.10.peg.1709	2320431.17.peg.1709	2320431.13.peg.1709	2320431.14.peg.1706	2320431.12.peg.1708	2320431.15.peg.1709	65058.241.peg.316
	294	65058.435.peg.377	65058.432.peg.356	2320431.4.peg.451	2320431.3.peg.458	65058.401.peg.450	65058.405.peg.237	65058.406.peg.409	65058.410.peg.450	65058.411.peg.410	65058.370.peg.237	65058.373.peg.237	65058.374.peg.240	65058.375.peg.240	65058.376.peg.450	65058.437.peg.218	65058.385.peg.407	65058.419.peg.237	65058.361.peg.451	65058.362.peg.237	65058.363.peg.452	65058.420.peg.455	65058.421.peg.237	65058.428.peg.237	65058.426.peg.237	65058.313.peg.451	65058.314.peg.60	65058.315.peg.224	65058.316.peg.452	2320456.3.peg.457	65058.317.peg.448	65058.318.peg.409	65058.319.peg.409	65058.320.peg.239	65058.321.peg.153	65058.322.peg.401	65058.323.peg.408	65058.229.peg.246	2320431.9.peg.1704	2320431.16.peg.1706	2320431.10.peg.1708	2320431.17.peg.1708	2320431.13.peg.1708	2320431.14.peg.1705	2320431.12.peg.1707	2320431.15.peg.1708	65058.241.peg.317
	295	65058.435.peg.378	65058.432.peg.357	2320431.4.peg.450	2320431.3.peg.457	65058.401.peg.449	65058.405.peg.238	65058.406.peg.408	65058.410.peg.449	65058.411.peg.409	65058.370.peg.238	65058.373.peg.238	65058.374.peg.241	65058.375.peg.241	65058.376.peg.449	65058.437.peg.219	65058.385.peg.406	65058.419.peg.238	65058.361.peg.450	65058.362.peg.238	65058.363.peg.451	65058.420.peg.454	65058.421.peg.238	65058.428.peg.238	65058.426.peg.238	65058.313.peg.450	65058.314.peg.61	65058.315.peg.223	65058.316.peg.451	2320456.3.peg.456	65058.317.peg.447	65058.318.peg.408	65058.319.peg.408	65058.320.peg.240	65058.321.peg.152	65058.322.peg.400	65058.323.peg.407	65058.229.peg.247	2320431.9.peg.1703	2320431.16.peg.1705	2320431.10.peg.1707	2320431.17.peg.1707	2320431.13.peg.1707	2320431.14.peg.1704	2320431.12.peg.1706	2320431.15.peg.1707	65058.241.peg.318
	296	65058.435.peg.379	65058.432.peg.358	2320431.4.peg.449	2320431.3.peg.456	65058.401.peg.448	65058.405.peg.239	65058.406.peg.407	65058.410.peg.448	65058.411.peg.408	65058.370.peg.239	65058.373.peg.239	65058.374.peg.242	65058.375.peg.242	65058.376.peg.448	65058.437.peg.220	65058.385.peg.405	65058.419.peg.239	65058.361.peg.449	65058.362.peg.239	65058.363.peg.450	65058.420.peg.453	65058.421.peg.239	65058.428.peg.239	65058.426.peg.239	65058.313.peg.449	65058.314.peg.62	65058.315.peg.222	65058.316.peg.450	2320456.3.peg.455	65058.317.peg.446	65058.318.peg.407	65058.319.peg.407	65058.320.peg.241	65058.321.peg.151	65058.322.peg.399	65058.323.peg.406	65058.229.peg.248	2320431.9.peg.1702	2320431.16.peg.1704	2320431.10.peg.1706	2320431.17.peg.1706	2320431.13.peg.1706	2320431.14.peg.1703	2320431.12.peg.1705	2320431.15.peg.1706	65058.241.peg.319
	297	65058.435.peg.380	65058.432.peg.359	2320431.4.peg.448	2320431.3.peg.455	65058.401.peg.447	65058.405.peg.240	65058.406.peg.406	65058.410.peg.447	65058.411.peg.407	65058.370.peg.240	65058.373.peg.240	65058.374.peg.243	65058.375.peg.243	65058.376.peg.447	65058.437.peg.221	65058.385.peg.404	65058.419.peg.240	65058.361.peg.448	65058.362.peg.240	65058.363.peg.449	65058.420.peg.452	65058.421.peg.240	65058.428.peg.240	65058.426.peg.240	65058.313.peg.448	65058.314.peg.63	65058.315.peg.221	65058.316.peg.449	2320456.3.peg.454	65058.317.peg.445	65058.318.peg.406	65058.319.peg.406	65058.320.peg.242	65058.321.peg.150	65058.322.peg.398	65058.323.peg.405	65058.229.peg.249	2320431.9.peg.1701	2320431.16.peg.1703	2320431.10.peg.1705	2320431.17.peg.1705	2320431.13.peg.1705	2320431.14.peg.1702	2320431.12.peg.1704	2320431.15.peg.1705	65058.241.peg.320
	298	65058.435.peg.381	65058.432.peg.360	2320431.4.peg.447	2320431.3.peg.454	65058.401.peg.446	65058.405.peg.241	65058.406.peg.405	65058.410.peg.446	65058.411.peg.406	65058.370.peg.241	65058.373.peg.241	65058.374.peg.244	65058.375.peg.244	65058.376.peg.446	65058.437.peg.222	65058.385.peg.403	65058.419.peg.241	65058.361.peg.447	65058.362.peg.241	65058.363.peg.448	65058.420.peg.451	65058.421.peg.241	65058.428.peg.241	65058.426.peg.241	65058.313.peg.447	65058.314.peg.64	65058.315.peg.220	65058.316.peg.448	2320456.3.peg.453	65058.317.peg.444	65058.318.peg.405	65058.319.peg.405	65058.320.peg.243	65058.321.peg.149	65058.322.peg.397	65058.323.peg.404	65058.229.peg.250	2320431.9.peg.1700	2320431.16.peg.1702	2320431.10.peg.1704	2320431.17.peg.1704	2320431.13.peg.1704	2320431.14.peg.1701	2320431.12.peg.1703	2320431.15.peg.1704	65058.241.peg.321
	299	65058.435.peg.382	65058.432.peg.362	2320431.4.peg.446	2320431.3.peg.453	65058.401.peg.445	65058.405.peg.242	65058.406.peg.404	65058.410.peg.445	65058.411.peg.405	65058.370.peg.242	65058.373.peg.242	65058.374.peg.245	65058.375.peg.245	65058.376.peg.445	65058.437.peg.223	65058.385.peg.402	65058.419.peg.242	65058.361.peg.446	65058.362.peg.242	65058.363.peg.447	65058.420.peg.450	65058.421.peg.242	65058.428.peg.242	65058.426.peg.242	65058.313.peg.446	65058.314.peg.65	65058.315.peg.219	65058.316.peg.447	2320456.3.peg.452	65058.317.peg.443	65058.318.peg.404	65058.319.peg.404	65058.320.peg.244	65058.321.peg.148	65058.322.peg.396	65058.323.peg.403	65058.229.peg.251	2320431.9.peg.1698	2320431.16.peg.1700	2320431.10.peg.1702	2320431.17.peg.1702	2320431.13.peg.1702	2320431.14.peg.1699	2320431.12.peg.1701	2320431.15.peg.1702	65058.241.peg.322
	300	65058.435.peg.383	65058.432.peg.363	2320431.4.peg.445	2320431.3.peg.452	65058.401.peg.444	65058.405.peg.243	65058.406.peg.403	65058.410.peg.444	65058.411.peg.404	65058.370.peg.243	65058.373.peg.243	65058.374.peg.246	65058.375.peg.246	65058.376.peg.444	65058.437.peg.224	65058.385.peg.401	65058.419.peg.243	65058.361.peg.445	65058.362.peg.243	65058.363.peg.446	65058.420.peg.449	65058.421.peg.243	65058.428.peg.243	65058.426.peg.243	65058.313.peg.445	65058.314.peg.66	65058.315.peg.218	65058.316.peg.446	2320456.3.peg.451	65058.317.peg.442	65058.318.peg.403	65058.319.peg.403	65058.320.peg.245	65058.321.peg.147	65058.322.peg.395	65058.323.peg.402	65058.229.peg.252	2320431.9.peg.1697	2320431.16.peg.1699	2320431.10.peg.1701	2320431.17.peg.1701	2320431.13.peg.1701	2320431.14.peg.1698	2320431.12.peg.1700	2320431.15.peg.1701	65058.241.peg.323
	301	65058.435.peg.384	65058.432.peg.364	2320431.4.peg.444	2320431.3.peg.451	65058.401.peg.443	65058.405.peg.244	65058.406.peg.402	65058.410.peg.443	65058.411.peg.403	65058.370.peg.244	65058.373.peg.244	65058.374.peg.247	65058.375.peg.247	65058.376.peg.443	65058.437.peg.225	65058.385.peg.400	65058.419.peg.244	65058.361.peg.444	65058.362.peg.244	65058.363.peg.445	65058.420.peg.448	65058.421.peg.244	65058.428.peg.244	65058.426.peg.244	65058.313.peg.444	65058.314.peg.67	65058.315.peg.217	65058.316.peg.445	2320456.3.peg.450	65058.317.peg.441	65058.318.peg.402	65058.319.peg.402	65058.320.peg.246	65058.321.peg.146	65058.322.peg.394	65058.323.peg.401	65058.229.peg.253	2320431.9.peg.1696	2320431.16.peg.1698	2320431.10.peg.1700	2320431.17.peg.1700	2320431.13.peg.1700	2320431.14.peg.1697	2320431.12.peg.1699	2320431.15.peg.1700	65058.241.peg.324
	302	65058.435.peg.385	65058.432.peg.365	2320431.4.peg.443	2320431.3.peg.450	65058.401.peg.442	65058.405.peg.245	65058.406.peg.401	65058.410.peg.442	65058.411.peg.402	65058.370.peg.245	65058.373.peg.245	65058.374.peg.248	65058.375.peg.248	65058.376.peg.442	65058.437.peg.226	65058.385.peg.399	65058.419.peg.245	65058.361.peg.443	65058.362.peg.245	65058.363.peg.444	65058.420.peg.447	65058.421.peg.245	65058.428.peg.245	65058.426.peg.245	65058.313.peg.443	65058.314.peg.68	65058.315.peg.216	65058.316.peg.444	2320456.3.peg.449	65058.317.peg.440	65058.318.peg.401	65058.319.peg.401	65058.320.peg.247	65058.321.peg.145	65058.322.peg.393	65058.323.peg.400	65058.229.peg.254	2320431.9.peg.1695	2320431.16.peg.1697	2320431.10.peg.1699	2320431.17.peg.1699	2320431.13.peg.1699	2320431.14.peg.1696	2320431.12.peg.1698	2320431.15.peg.1699	65058.241.peg.325
	303	65058.435.peg.386	65058.432.peg.366	2320431.4.peg.442	2320431.3.peg.449	65058.401.peg.441	65058.405.peg.246	65058.406.peg.400	65058.410.peg.441	65058.411.peg.401	65058.370.peg.246	65058.373.peg.246	65058.374.peg.249	65058.375.peg.249	65058.376.peg.441	65058.437.peg.227	65058.385.peg.398	65058.419.peg.246	65058.361.peg.442	65058.362.peg.246	65058.363.peg.443	65058.420.peg.446	65058.421.peg.246	65058.428.peg.246	65058.426.peg.246	65058.313.peg.442	65058.314.peg.69	65058.315.peg.215	65058.316.peg.443	2320456.3.peg.448	65058.317.peg.439	65058.318.peg.400	65058.319.peg.400	65058.320.peg.248	65058.321.peg.144	65058.322.peg.392	65058.323.peg.399	65058.229.peg.255	2320431.9.peg.1694	2320431.16.peg.1696	2320431.10.peg.1698	2320431.17.peg.1698	2320431.13.peg.1698	2320431.14.peg.1695	2320431.12.peg.1697	2320431.15.peg.1698	65058.241.peg.326
	304	65058.435.peg.387	65058.432.peg.367	2320431.4.peg.441	2320431.3.peg.448	65058.401.peg.440	65058.405.peg.247	65058.406.peg.399	65058.410.peg.440	65058.411.peg.400	65058.370.peg.247	65058.373.peg.247	65058.374.peg.250	65058.375.peg.250	65058.376.peg.440	65058.437.peg.228	65058.385.peg.397	65058.419.peg.247	65058.361.peg.441	65058.362.peg.247	65058.363.peg.442	65058.420.peg.445	65058.421.peg.247	65058.428.peg.247	65058.426.peg.247	65058.313.peg.441	65058.314.peg.70	65058.315.peg.214	65058.316.peg.442	2320456.3.peg.447	65058.317.peg.438	65058.318.peg.399	65058.319.peg.399	65058.320.peg.249	65058.321.peg.143	65058.322.peg.391	65058.323.peg.398	65058.229.peg.256	2320431.9.peg.1693	2320431.16.peg.1695	2320431.10.peg.1697	2320431.17.peg.1697	2320431.13.peg.1697	2320431.14.peg.1694	2320431.12.peg.1696	2320431.15.peg.1697	65058.241.peg.327
	305	65058.435.peg.388	65058.432.peg.368	2320431.4.peg.440	2320431.3.peg.447	65058.401.peg.439	65058.405.peg.248	65058.406.peg.398	65058.410.peg.439	65058.411.peg.399	65058.370.peg.248	65058.373.peg.248	65058.374.peg.251	65058.375.peg.251	65058.376.peg.439	65058.437.peg.229	65058.385.peg.396	65058.419.peg.248	65058.361.peg.440	65058.362.peg.248	65058.363.peg.441	65058.420.peg.444	65058.421.peg.248	65058.428.peg.248	65058.426.peg.248	65058.313.peg.440	65058.314.peg.71	65058.315.peg.213	65058.316.peg.441	2320456.3.peg.446	65058.317.peg.437	65058.318.peg.398	65058.319.peg.398	65058.320.peg.250	65058.321.peg.142	65058.322.peg.390	65058.323.peg.397	65058.229.peg.257	2320431.9.peg.1692	2320431.16.peg.1694	2320431.10.peg.1696	2320431.17.peg.1696	2320431.13.peg.1696	2320431.14.peg.1693	2320431.12.peg.1695	2320431.15.peg.1696	65058.241.peg.328
	306	65058.435.peg.389	65058.432.peg.369	2320431.4.peg.439	2320431.3.peg.446	65058.401.peg.438	65058.405.peg.249	65058.406.peg.397	65058.410.peg.438	65058.411.peg.398	65058.370.peg.249	65058.373.peg.249	65058.374.peg.252	65058.375.peg.252	65058.376.peg.438	65058.437.peg.230	65058.385.peg.395	65058.419.peg.249	65058.361.peg.439	65058.362.peg.249	65058.363.peg.440	65058.420.peg.443	65058.421.peg.249	65058.428.peg.249	65058.426.peg.249	65058.313.peg.439	65058.314.peg.72	65058.315.peg.212	65058.316.peg.440	2320456.3.peg.445	65058.317.peg.436	65058.318.peg.397	65058.319.peg.397	65058.320.peg.251	65058.321.peg.141	65058.322.peg.389	65058.323.peg.396	65058.229.peg.258	2320431.9.peg.1691	2320431.16.peg.1693	2320431.10.peg.1695	2320431.17.peg.1695	2320431.13.peg.1695	2320431.14.peg.1692	2320431.12.peg.1694	2320431.15.peg.1695	65058.241.peg.329
	307	65058.435.peg.390	65058.432.peg.370	2320431.4.peg.438	2320431.3.peg.445	65058.401.peg.437	65058.405.peg.250	65058.406.peg.396	65058.410.peg.437	65058.411.peg.397	65058.370.peg.250	65058.373.peg.250	65058.374.peg.253	65058.375.peg.253	65058.376.peg.437	65058.437.peg.231	65058.385.peg.394	65058.419.peg.250	65058.361.peg.438	65058.362.peg.250	65058.363.peg.439	65058.420.peg.442	65058.421.peg.250	65058.428.peg.250	65058.426.peg.250	65058.313.peg.438	65058.314.peg.73	65058.315.peg.211	65058.316.peg.439	2320456.3.peg.444	65058.317.peg.435	65058.318.peg.396	65058.319.peg.396	65058.320.peg.252	65058.321.peg.140	65058.322.peg.388	65058.323.peg.395	65058.229.peg.259	2320431.9.peg.1690	2320431.16.peg.1692	2320431.10.peg.1694	2320431.17.peg.1694	2320431.13.peg.1694	2320431.14.peg.1691	2320431.12.peg.1693	2320431.15.peg.1694	65058.241.peg.330
	308	65058.435.peg.391	65058.432.peg.371	2320431.4.peg.437	2320431.3.peg.444	65058.401.peg.436	65058.405.peg.251	65058.406.peg.395	65058.410.peg.436	65058.411.peg.396	65058.370.peg.251	65058.373.peg.251	65058.374.peg.254	65058.375.peg.254	65058.376.peg.436	65058.437.peg.232	65058.385.peg.393	65058.419.peg.251	65058.361.peg.437	65058.362.peg.251	65058.363.peg.438	65058.420.peg.441	65058.421.peg.251	65058.428.peg.251	65058.426.peg.251	65058.313.peg.437	65058.314.peg.74	65058.315.peg.210	65058.316.peg.438	2320456.3.peg.443	65058.317.peg.434	65058.318.peg.395	65058.319.peg.395	65058.320.peg.253	65058.321.peg.139	65058.322.peg.387	65058.323.peg.394	65058.229.peg.260	2320431.9.peg.1689	2320431.16.peg.1691	2320431.10.peg.1693	2320431.17.peg.1693	2320431.13.peg.1693	2320431.14.peg.1690	2320431.12.peg.1692	2320431.15.peg.1693	65058.241.peg.331
	309	65058.435.peg.392	65058.432.peg.372	2320431.4.peg.436	2320431.3.peg.443	65058.401.peg.435	65058.405.peg.252	65058.406.peg.394	65058.410.peg.435	65058.411.peg.395	65058.370.peg.252	65058.373.peg.252	65058.374.peg.255	65058.375.peg.255	65058.376.peg.435	65058.437.peg.233	65058.385.peg.392	65058.419.peg.252	65058.361.peg.436	65058.362.peg.252	65058.363.peg.437	65058.420.peg.440	65058.421.peg.252	65058.428.peg.252	65058.426.peg.252	65058.313.peg.436	65058.314.peg.75	65058.315.peg.209	65058.316.peg.437	2320456.3.peg.442	65058.317.peg.433	65058.318.peg.394	65058.319.peg.394	65058.320.peg.254	65058.321.peg.138	65058.322.peg.386	65058.323.peg.393	65058.229.peg.261	2320431.9.peg.1688	2320431.16.peg.1690	2320431.10.peg.1692	2320431.17.peg.1692	2320431.13.peg.1692	2320431.14.peg.1689	2320431.12.peg.1691	2320431.15.peg.1692	65058.241.peg.332
	310	65058.435.peg.393	65058.432.peg.373	2320431.4.peg.435	2320431.3.peg.442	65058.401.peg.434	65058.405.peg.253	65058.406.peg.393	65058.410.peg.434	65058.411.peg.394	65058.370.peg.253	65058.373.peg.253	65058.374.peg.256	65058.375.peg.256	65058.376.peg.434	65058.437.peg.234	65058.385.peg.391	65058.419.peg.253	65058.361.peg.435	65058.362.peg.253	65058.363.peg.436	65058.420.peg.439	65058.421.peg.253	65058.428.peg.253	65058.426.peg.253	65058.313.peg.435	65058.314.peg.76	65058.315.peg.208	65058.316.peg.436	2320456.3.peg.441	65058.317.peg.432	65058.318.peg.393	65058.319.peg.393	65058.320.peg.255	65058.321.peg.137	65058.322.peg.385	65058.323.peg.392	65058.229.peg.262	2320431.9.peg.1687	2320431.16.peg.1689	2320431.10.peg.1691	2320431.17.peg.1691	2320431.13.peg.1691	2320431.14.peg.1688	2320431.12.peg.1690	2320431.15.peg.1691	65058.241.peg.333
	311	65058.435.peg.394	65058.432.peg.374	2320431.4.peg.434	2320431.3.peg.441	65058.401.peg.433	65058.405.peg.254	65058.406.peg.392	65058.410.peg.433	65058.411.peg.393	65058.370.peg.254	65058.373.peg.254	65058.374.peg.257	65058.375.peg.257	65058.376.peg.433	65058.437.peg.235	65058.385.peg.390	65058.419.peg.254	65058.361.peg.434	65058.362.peg.254	65058.363.peg.435	65058.420.peg.438	65058.421.peg.254	65058.428.peg.254	65058.426.peg.254	65058.313.peg.434	65058.314.peg.77	65058.315.peg.207	65058.316.peg.435	2320456.3.peg.440	65058.317.peg.431	65058.318.peg.392	65058.319.peg.392	65058.320.peg.256	65058.321.peg.136	65058.322.peg.384	65058.323.peg.391	65058.229.peg.263	2320431.9.peg.1686	2320431.16.peg.1688	2320431.10.peg.1690	2320431.17.peg.1690	2320431.13.peg.1690	2320431.14.peg.1687	2320431.12.peg.1689	2320431.15.peg.1690	65058.241.peg.334
	312	65058.435.peg.395	65058.432.peg.375	2320431.4.peg.433	2320431.3.peg.440	65058.401.peg.432	65058.405.peg.255	65058.406.peg.391	65058.410.peg.432	65058.411.peg.392	65058.370.peg.255	65058.373.peg.255	65058.374.peg.258	65058.375.peg.258	65058.376.peg.432	65058.437.peg.236	65058.385.peg.389	65058.419.peg.255	65058.361.peg.433	65058.362.peg.255	65058.363.peg.434	65058.420.peg.437	65058.421.peg.255	65058.428.peg.255	65058.426.peg.255	65058.313.peg.433	65058.314.peg.78	65058.315.peg.206	65058.316.peg.434	2320456.3.peg.439	65058.317.peg.430	65058.318.peg.391	65058.319.peg.391	65058.320.peg.257	65058.321.peg.135	65058.322.peg.383	65058.323.peg.390	65058.229.peg.264	2320431.9.peg.1685	2320431.16.peg.1687	2320431.10.peg.1689	2320431.17.peg.1689	2320431.13.peg.1689	2320431.14.peg.1686	2320431.12.peg.1688	2320431.15.peg.1689	65058.241.peg.335
	313	65058.435.peg.396	65058.432.peg.376	2320431.4.peg.432	2320431.3.peg.439	65058.401.peg.431	65058.405.peg.256	65058.406.peg.390	65058.410.peg.431	65058.411.peg.391	65058.370.peg.256	65058.373.peg.256	65058.374.peg.259	65058.375.peg.259	65058.376.peg.431	65058.437.peg.237	65058.385.peg.388	65058.419.peg.256	65058.361.peg.432	65058.362.peg.256	65058.363.peg.433	65058.420.peg.436	65058.421.peg.256	65058.428.peg.256	65058.426.peg.256	65058.313.peg.432	65058.314.peg.79	65058.315.peg.205	65058.316.peg.433	2320456.3.peg.438	65058.317.peg.429	65058.318.peg.390	65058.319.peg.390	65058.320.peg.258	65058.321.peg.134	65058.322.peg.382	65058.323.peg.389	65058.229.peg.265	2320431.9.peg.1684	2320431.16.peg.1686	2320431.10.peg.1688	2320431.17.peg.1688	2320431.13.peg.1688	2320431.14.peg.1685	2320431.12.peg.1687	2320431.15.peg.1688	65058.241.peg.336
	314	65058.435.peg.397	65058.432.peg.377	2320431.4.peg.431	2320431.3.peg.438	65058.401.peg.430	65058.405.peg.257	65058.406.peg.389	65058.410.peg.430	65058.411.peg.390	65058.370.peg.257	65058.373.peg.257	65058.374.peg.260	65058.375.peg.260	65058.376.peg.430	65058.437.peg.238	65058.385.peg.387	65058.419.peg.257	65058.361.peg.431	65058.362.peg.257	65058.363.peg.432	65058.420.peg.435	65058.421.peg.257	65058.428.peg.257	65058.426.peg.257	65058.313.peg.431	65058.314.peg.80	65058.315.peg.204	65058.316.peg.432	2320456.3.peg.437	65058.317.peg.428	65058.318.peg.389	65058.319.peg.389	65058.320.peg.259	65058.321.peg.133	65058.322.peg.381	65058.323.peg.388	65058.229.peg.266	2320431.9.peg.1683	2320431.16.peg.1685	2320431.10.peg.1687	2320431.17.peg.1687	2320431.13.peg.1687	2320431.14.peg.1684	2320431.12.peg.1686	2320431.15.peg.1687	65058.241.peg.337
	315	65058.435.peg.398	65058.432.peg.378	2320431.4.peg.430	2320431.3.peg.437	65058.401.peg.429	65058.405.peg.258	65058.406.peg.388	65058.410.peg.429	65058.411.peg.389	65058.370.peg.258	65058.373.peg.258	65058.374.peg.261	65058.375.peg.261	65058.376.peg.429	65058.437.peg.239	65058.385.peg.386	65058.419.peg.258	65058.361.peg.430	65058.362.peg.258	65058.363.peg.431	65058.420.peg.434	65058.421.peg.258	65058.428.peg.258	65058.426.peg.258	65058.313.peg.430	65058.314.peg.81	65058.315.peg.203	65058.316.peg.431	2320456.3.peg.436	65058.317.peg.427	65058.318.peg.388	65058.319.peg.388	65058.320.peg.260	65058.321.peg.132	65058.322.peg.380	65058.323.peg.387	65058.229.peg.267	2320431.9.peg.1682	2320431.16.peg.1684	2320431.10.peg.1686	2320431.17.peg.1686	2320431.13.peg.1686	2320431.14.peg.1683	2320431.12.peg.1685	2320431.15.peg.1686	65058.241.peg.338
	316	65058.435.peg.399	65058.432.peg.379	2320431.4.peg.429	2320431.3.peg.436	65058.401.peg.428	65058.405.peg.259	65058.406.peg.387	65058.410.peg.428	65058.411.peg.388	65058.370.peg.259	65058.373.peg.259	65058.374.peg.262	65058.375.peg.262	65058.376.peg.428	65058.437.peg.240	65058.385.peg.385	65058.419.peg.259	65058.361.peg.429	65058.362.peg.259	65058.363.peg.430	65058.420.peg.433	65058.421.peg.259	65058.428.peg.259	65058.426.peg.259	65058.313.peg.429	65058.314.peg.82	65058.315.peg.202	65058.316.peg.430	2320456.3.peg.435	65058.317.peg.426	65058.318.peg.387	65058.319.peg.387	65058.320.peg.261	65058.321.peg.131	65058.322.peg.379	65058.323.peg.386	65058.229.peg.268	2320431.9.peg.1681	2320431.16.peg.1683	2320431.10.peg.1685	2320431.17.peg.1685	2320431.13.peg.1685	2320431.14.peg.1682	2320431.12.peg.1684	2320431.15.peg.1685	65058.241.peg.339
	317	65058.435.peg.401	65058.432.peg.381	2320431.4.peg.427	2320431.3.peg.434	65058.401.peg.426	65058.405.peg.261	65058.406.peg.385	65058.410.peg.426	65058.411.peg.386	65058.370.peg.260	65058.373.peg.260	65058.374.peg.264	65058.375.peg.264	65058.376.peg.426	65058.437.peg.242	65058.385.peg.383	65058.419.peg.261	65058.361.peg.427	65058.362.peg.261	65058.363.peg.428	65058.420.peg.431	65058.421.peg.261	65058.428.peg.261	65058.426.peg.261	65058.313.peg.427	65058.314.peg.84	65058.315.peg.200	65058.316.peg.428	2320456.3.peg.433	65058.317.peg.424	65058.318.peg.385	65058.319.peg.385	65058.320.peg.263	65058.321.peg.129	65058.322.peg.377	65058.323.peg.384	65058.229.peg.270	2320431.9.peg.1680	2320431.16.peg.1682	2320431.10.peg.1684	2320431.17.peg.1684	2320431.13.peg.1684	2320431.14.peg.1681	2320431.12.peg.1683	2320431.15.peg.1684	65058.241.peg.341
	318	65058.435.peg.402	65058.432.peg.382	2320431.4.peg.426	2320431.3.peg.433	65058.401.peg.425	65058.405.peg.262	65058.406.peg.384	65058.410.peg.425	65058.411.peg.385	65058.370.peg.261	65058.373.peg.261	65058.374.peg.265	65058.375.peg.265	65058.376.peg.425	65058.437.peg.243	65058.385.peg.382	65058.419.peg.262	65058.361.peg.426	65058.362.peg.262	65058.363.peg.427	65058.420.peg.430	65058.421.peg.262	65058.428.peg.262	65058.426.peg.262	65058.313.peg.426	65058.314.peg.85	65058.315.peg.199	65058.316.peg.427	2320456.3.peg.432	65058.317.peg.423	65058.318.peg.384	65058.319.peg.384	65058.320.peg.264	65058.321.peg.128	65058.322.peg.376	65058.323.peg.383	65058.229.peg.271	2320431.9.peg.1679	2320431.16.peg.1681	2320431.10.peg.1683	2320431.17.peg.1683	2320431.13.peg.1683	2320431.14.peg.1680	2320431.12.peg.1682	2320431.15.peg.1683	65058.241.peg.342
	319	65058.435.peg.403	65058.432.peg.383	2320431.4.peg.425	2320431.3.peg.432	65058.401.peg.424	65058.405.peg.263	65058.406.peg.383	65058.410.peg.424	65058.411.peg.384	65058.370.peg.262	65058.373.peg.262	65058.374.peg.266	65058.375.peg.266	65058.376.peg.424	65058.437.peg.244	65058.385.peg.381	65058.419.peg.263	65058.361.peg.425	65058.362.peg.263	65058.363.peg.426	65058.420.peg.429	65058.421.peg.263	65058.428.peg.263	65058.426.peg.263	65058.313.peg.425	65058.314.peg.86	65058.315.peg.198	65058.316.peg.426	2320456.3.peg.431	65058.317.peg.422	65058.318.peg.383	65058.319.peg.383	65058.320.peg.265	65058.321.peg.127	65058.322.peg.375	65058.323.peg.382	65058.229.peg.272	2320431.9.peg.1678	2320431.16.peg.1680	2320431.10.peg.1682	2320431.17.peg.1682	2320431.13.peg.1682	2320431.14.peg.1679	2320431.12.peg.1681	2320431.15.peg.1682	65058.241.peg.343
	320	65058.435.peg.405	65058.432.peg.385	2320431.4.peg.423	2320431.3.peg.430	65058.401.peg.423	65058.405.peg.264	65058.406.peg.382	65058.410.peg.423	65058.411.peg.383	65058.370.peg.263	65058.373.peg.263	65058.374.peg.267	65058.375.peg.268	65058.376.peg.423	65058.437.peg.245	65058.385.peg.380	65058.419.peg.264	65058.361.peg.424	65058.362.peg.264	65058.363.peg.425	65058.420.peg.428	65058.421.peg.264	65058.428.peg.264	65058.426.peg.264	65058.313.peg.424	65058.314.peg.87	65058.315.peg.197	65058.316.peg.425	2320456.3.peg.429	65058.317.peg.421	65058.318.peg.382	65058.319.peg.382	65058.320.peg.266	65058.321.peg.126	65058.322.peg.374	65058.323.peg.381	65058.229.peg.274	2320431.9.peg.1677	2320431.16.peg.1679	2320431.10.peg.1681	2320431.17.peg.1681	2320431.13.peg.1681	2320431.14.peg.1678	2320431.12.peg.1680	2320431.15.peg.1681	65058.241.peg.345
	321	65058.435.peg.406	65058.432.peg.386	2320431.4.peg.422	2320431.3.peg.429	65058.401.peg.422	65058.405.peg.265	65058.406.peg.381	65058.410.peg.422	65058.411.peg.382	65058.370.peg.264	65058.373.peg.264	65058.374.peg.268	65058.375.peg.269	65058.376.peg.422	65058.437.peg.246	65058.385.peg.379	65058.419.peg.265	65058.361.peg.423	65058.362.peg.265	65058.363.peg.424	65058.420.peg.427	65058.421.peg.265	65058.428.peg.265	65058.426.peg.265	65058.313.peg.423	65058.314.peg.88	65058.315.peg.196	65058.316.peg.424	2320456.3.peg.428	65058.317.peg.420	65058.318.peg.381	65058.319.peg.381	65058.320.peg.267	65058.321.peg.125	65058.322.peg.373	65058.323.peg.380	65058.229.peg.275	2320431.9.peg.1676	2320431.16.peg.1678	2320431.10.peg.1680	2320431.17.peg.1680	2320431.13.peg.1680	2320431.14.peg.1677	2320431.12.peg.1679	2320431.15.peg.1680	65058.241.peg.346
	322	65058.435.peg.407	65058.432.peg.387	2320431.4.peg.421	2320431.3.peg.428	65058.401.peg.421	65058.405.peg.266	65058.406.peg.380	65058.410.peg.421	65058.411.peg.381	65058.370.peg.265	65058.373.peg.265	65058.374.peg.269	65058.375.peg.270	65058.376.peg.421	65058.437.peg.247	65058.385.peg.378	65058.419.peg.266	65058.361.peg.422	65058.362.peg.266	65058.363.peg.423	65058.420.peg.426	65058.421.peg.266	65058.428.peg.266	65058.426.peg.266	65058.313.peg.422	65058.314.peg.89	65058.315.peg.195	65058.316.peg.423	2320456.3.peg.427	65058.317.peg.419	65058.318.peg.380	65058.319.peg.380	65058.320.peg.268	65058.321.peg.124	65058.322.peg.372	65058.323.peg.379	65058.229.peg.276	2320431.9.peg.1675	2320431.16.peg.1677	2320431.10.peg.1679	2320431.17.peg.1679	2320431.13.peg.1679	2320431.14.peg.1676	2320431.12.peg.1678	2320431.15.peg.1679	65058.241.peg.347
	323	65058.435.peg.410	65058.432.peg.390	2320431.4.peg.418	2320431.3.peg.425	65058.401.peg.418	65058.405.peg.269	65058.406.peg.377	65058.410.peg.418	65058.411.peg.378	65058.370.peg.268	65058.373.peg.268	65058.374.peg.272	65058.375.peg.273	65058.376.peg.418	65058.437.peg.250	65058.385.peg.375	65058.419.peg.269	65058.361.peg.419	65058.362.peg.269	65058.363.peg.420	65058.420.peg.423	65058.421.peg.269	65058.428.peg.269	65058.426.peg.269	65058.313.peg.419	65058.314.peg.92	65058.315.peg.192	65058.316.peg.420	2320456.3.peg.424	65058.317.peg.416	65058.318.peg.377	65058.319.peg.377	65058.320.peg.271	65058.321.peg.121	65058.322.peg.369	65058.323.peg.376	65058.229.peg.279	2320431.9.peg.1673	2320431.16.peg.1675	2320431.10.peg.1676	2320431.17.peg.1677	2320431.13.peg.1677	2320431.14.peg.1674	2320431.12.peg.1676	2320431.15.peg.1677	65058.241.peg.350
	324	65058.435.peg.411	65058.432.peg.391	2320431.4.peg.417	2320431.3.peg.424	65058.401.peg.417	65058.405.peg.270	65058.406.peg.376	65058.410.peg.417	65058.411.peg.377	65058.370.peg.269	65058.373.peg.269	65058.374.peg.273	65058.375.peg.274	65058.376.peg.417	65058.437.peg.251	65058.385.peg.374	65058.419.peg.270	65058.361.peg.418	65058.362.peg.270	65058.363.peg.419	65058.420.peg.422	65058.421.peg.270	65058.428.peg.270	65058.426.peg.270	65058.313.peg.418	65058.314.peg.93	65058.315.peg.191	65058.316.peg.419	2320456.3.peg.423	65058.317.peg.415	65058.318.peg.376	65058.319.peg.376	65058.320.peg.272	65058.321.peg.120	65058.322.peg.368	65058.323.peg.375	65058.229.peg.280	2320431.9.peg.1672	2320431.16.peg.1674	2320431.10.peg.1675	2320431.17.peg.1676	2320431.13.peg.1676	2320431.14.peg.1673	2320431.12.peg.1675	2320431.15.peg.1676	65058.241.peg.351
	325	65058.435.peg.412	65058.432.peg.392	2320431.4.peg.416	2320431.3.peg.423	65058.401.peg.416	65058.405.peg.271	65058.406.peg.375	65058.410.peg.416	65058.411.peg.376	65058.370.peg.270	65058.373.peg.270	65058.374.peg.274	65058.375.peg.275	65058.376.peg.416	65058.437.peg.252	65058.385.peg.373	65058.419.peg.271	65058.361.peg.417	65058.362.peg.271	65058.363.peg.418	65058.420.peg.421	65058.421.peg.271	65058.428.peg.271	65058.426.peg.271	65058.313.peg.417	65058.314.peg.94	65058.315.peg.190	65058.316.peg.418	2320456.3.peg.422	65058.317.peg.414	65058.318.peg.375	65058.319.peg.375	65058.320.peg.273	65058.321.peg.119	65058.322.peg.367	65058.323.peg.374	65058.229.peg.281	2320431.9.peg.1671	2320431.16.peg.1673	2320431.10.peg.1674	2320431.17.peg.1675	2320431.13.peg.1675	2320431.14.peg.1672	2320431.12.peg.1674	2320431.15.peg.1675	65058.241.peg.352
	326	65058.435.peg.413	65058.432.peg.393	2320431.4.peg.415	2320431.3.peg.422	65058.401.peg.415	65058.405.peg.272	65058.406.peg.374	65058.410.peg.415	65058.411.peg.375	65058.370.peg.271	65058.373.peg.271	65058.374.peg.275	65058.375.peg.276	65058.376.peg.415	65058.437.peg.253	65058.385.peg.372	65058.419.peg.272	65058.361.peg.416	65058.362.peg.272	65058.363.peg.417	65058.420.peg.420	65058.421.peg.272	65058.428.peg.272	65058.426.peg.272	65058.313.peg.416	65058.314.peg.95	65058.315.peg.189	65058.316.peg.417	2320456.3.peg.421	65058.317.peg.413	65058.318.peg.374	65058.319.peg.374	65058.320.peg.274	65058.321.peg.118	65058.322.peg.366	65058.323.peg.373	65058.229.peg.282	2320431.9.peg.1670	2320431.16.peg.1672	2320431.10.peg.1673	2320431.17.peg.1674	2320431.13.peg.1674	2320431.14.peg.1671	2320431.12.peg.1673	2320431.15.peg.1674	65058.241.peg.353
	327	65058.435.peg.414	65058.432.peg.394	2320431.4.peg.414	2320431.3.peg.421	65058.401.peg.414	65058.405.peg.273	65058.406.peg.373	65058.410.peg.414	65058.411.peg.374	65058.370.peg.272	65058.373.peg.272	65058.374.peg.276	65058.375.peg.277	65058.376.peg.414	65058.437.peg.254	65058.385.peg.371	65058.419.peg.273	65058.361.peg.415	65058.362.peg.273	65058.363.peg.416	65058.420.peg.419	65058.421.peg.273	65058.428.peg.273	65058.426.peg.273	65058.313.peg.415	65058.314.peg.96	65058.315.peg.188	65058.316.peg.416	2320456.3.peg.420	65058.317.peg.412	65058.318.peg.373	65058.319.peg.373	65058.320.peg.275	65058.321.peg.117	65058.322.peg.365	65058.323.peg.372	65058.229.peg.283	2320431.9.peg.1669	2320431.16.peg.1671	2320431.10.peg.1672	2320431.17.peg.1673	2320431.13.peg.1673	2320431.14.peg.1670	2320431.12.peg.1672	2320431.15.peg.1673	65058.241.peg.354
	328	65058.435.peg.415	65058.432.peg.395	2320431.4.peg.413	2320431.3.peg.420	65058.401.peg.413	65058.405.peg.274	65058.406.peg.372	65058.410.peg.413	65058.411.peg.373	65058.370.peg.273	65058.373.peg.273	65058.374.peg.277	65058.375.peg.278	65058.376.peg.413	65058.437.peg.255	65058.385.peg.370	65058.419.peg.274	65058.361.peg.414	65058.362.peg.274	65058.363.peg.415	65058.420.peg.418	65058.421.peg.274	65058.428.peg.274	65058.426.peg.274	65058.313.peg.414	65058.314.peg.97	65058.315.peg.187	65058.316.peg.415	2320456.3.peg.419	65058.317.peg.411	65058.318.peg.372	65058.319.peg.372	65058.320.peg.276	65058.321.peg.116	65058.322.peg.364	65058.323.peg.371	65058.229.peg.284	2320431.9.peg.1668	2320431.16.peg.1670	2320431.10.peg.1671	2320431.17.peg.1672	2320431.13.peg.1672	2320431.14.peg.1669	2320431.12.peg.1671	2320431.15.peg.1672	65058.241.peg.355
	329	65058.435.peg.419	65058.432.peg.400	2320431.4.peg.409	2320431.3.peg.416	65058.401.peg.409	65058.405.peg.278	65058.406.peg.368	65058.410.peg.409	65058.411.peg.369	65058.370.peg.277	65058.373.peg.277	65058.374.peg.281	65058.375.peg.282	65058.376.peg.409	65058.437.peg.259	65058.385.peg.366	65058.419.peg.278	65058.361.peg.410	65058.362.peg.278	65058.363.peg.411	65058.420.peg.414	65058.421.peg.278	65058.428.peg.278	65058.426.peg.279	65058.313.peg.410	65058.314.peg.101	65058.315.peg.183	65058.316.peg.411	2320456.3.peg.415	65058.317.peg.407	65058.318.peg.368	65058.319.peg.367	65058.320.peg.281	65058.321.peg.112	65058.322.peg.360	65058.323.peg.367	65058.229.peg.288	2320431.9.peg.1662	2320431.16.peg.1664	2320431.10.peg.1665	2320431.17.peg.1666	2320431.13.peg.1666	2320431.14.peg.1663	2320431.12.peg.1665	2320431.15.peg.1666	65058.241.peg.360
	330	65058.435.peg.420	65058.432.peg.401	2320431.4.peg.408	2320431.3.peg.415	65058.401.peg.408	65058.405.peg.279	65058.406.peg.367	65058.410.peg.408	65058.411.peg.368	65058.370.peg.278	65058.373.peg.278	65058.374.peg.282	65058.375.peg.283	65058.376.peg.408	65058.437.peg.260	65058.385.peg.365	65058.419.peg.279	65058.361.peg.409	65058.362.peg.279	65058.363.peg.410	65058.420.peg.413	65058.421.peg.279	65058.428.peg.279	65058.426.peg.280	65058.313.peg.409	65058.314.peg.102	65058.315.peg.182	65058.316.peg.410	2320456.3.peg.414	65058.317.peg.406	65058.318.peg.367	65058.319.peg.366	65058.320.peg.282	65058.321.peg.111	65058.322.peg.359	65058.323.peg.366	65058.229.peg.289	2320431.9.peg.1661	2320431.16.peg.1663	2320431.10.peg.1664	2320431.17.peg.1665	2320431.13.peg.1665	2320431.14.peg.1662	2320431.12.peg.1664	2320431.15.peg.1665	65058.241.peg.361
	331	65058.435.peg.421	65058.432.peg.402	2320431.4.peg.407	2320431.3.peg.414	65058.401.peg.407	65058.405.peg.280	65058.406.peg.366	65058.410.peg.407	65058.411.peg.367	65058.370.peg.279	65058.373.peg.279	65058.374.peg.283	65058.375.peg.284	65058.376.peg.407	65058.437.peg.261	65058.385.peg.364	65058.419.peg.280	65058.361.peg.408	65058.362.peg.280	65058.363.peg.409	65058.420.peg.412	65058.421.peg.280	65058.428.peg.280	65058.426.peg.281	65058.313.peg.408	65058.314.peg.103	65058.315.peg.181	65058.316.peg.409	2320456.3.peg.413	65058.317.peg.405	65058.318.peg.366	65058.319.peg.365	65058.320.peg.283	65058.321.peg.110	65058.322.peg.358	65058.323.peg.365	65058.229.peg.290	2320431.9.peg.1660	2320431.16.peg.1662	2320431.10.peg.1663	2320431.17.peg.1664	2320431.13.peg.1664	2320431.14.peg.1661	2320431.12.peg.1663	2320431.15.peg.1664	65058.241.peg.362
	332	65058.435.peg.422	65058.432.peg.403	2320431.4.peg.406	2320431.3.peg.413	65058.401.peg.406	65058.405.peg.281	65058.406.peg.365	65058.410.peg.406	65058.411.peg.366	65058.370.peg.280	65058.373.peg.280	65058.374.peg.284	65058.375.peg.285	65058.376.peg.406	65058.437.peg.262	65058.385.peg.363	65058.419.peg.281	65058.361.peg.407	65058.362.peg.281	65058.363.peg.408	65058.420.peg.411	65058.421.peg.281	65058.428.peg.281	65058.426.peg.282	65058.313.peg.407	65058.314.peg.104	65058.315.peg.180	65058.316.peg.408	2320456.3.peg.412	65058.317.peg.404	65058.318.peg.365	65058.319.peg.364	65058.320.peg.284	65058.321.peg.109	65058.322.peg.357	65058.323.peg.364	65058.229.peg.291	2320431.9.peg.1659	2320431.16.peg.1661	2320431.10.peg.1662	2320431.17.peg.1663	2320431.13.peg.1663	2320431.14.peg.1660	2320431.12.peg.1662	2320431.15.peg.1663	65058.241.peg.363
	333	65058.435.peg.423	65058.432.peg.404	2320431.4.peg.405	2320431.3.peg.412	65058.401.peg.404	65058.405.peg.282	65058.406.peg.364	65058.410.peg.405	65058.411.peg.365	65058.370.peg.281	65058.373.peg.281	65058.374.peg.285	65058.375.peg.286	65058.376.peg.405	65058.437.peg.263	65058.385.peg.362	65058.419.peg.282	65058.361.peg.406	65058.362.peg.282	65058.363.peg.407	65058.420.peg.410	65058.421.peg.282	65058.428.peg.282	65058.426.peg.283	65058.313.peg.406	65058.314.peg.105	65058.315.peg.179	65058.316.peg.407	2320456.3.peg.411	65058.317.peg.403	65058.318.peg.364	65058.319.peg.363	65058.320.peg.285	65058.321.peg.108	65058.322.peg.356	65058.323.peg.363	65058.229.peg.292	2320431.9.peg.1658	2320431.16.peg.1660	2320431.10.peg.1661	2320431.17.peg.1662	2320431.13.peg.1662	2320431.14.peg.1659	2320431.12.peg.1661	2320431.15.peg.1662	65058.241.peg.364
	334	65058.435.peg.424	65058.432.peg.405	2320431.4.peg.404	2320431.3.peg.411	65058.401.peg.403	65058.405.peg.283	65058.406.peg.363	65058.410.peg.404	65058.411.peg.364	65058.370.peg.282	65058.373.peg.282	65058.374.peg.286	65058.375.peg.287	65058.376.peg.404	65058.437.peg.264	65058.385.peg.361	65058.419.peg.283	65058.361.peg.405	65058.362.peg.283	65058.363.peg.406	65058.420.peg.409	65058.421.peg.283	65058.428.peg.283	65058.426.peg.284	65058.313.peg.405	65058.314.peg.106	65058.315.peg.178	65058.316.peg.406	2320456.3.peg.410	65058.317.peg.402	65058.318.peg.363	65058.319.peg.362	65058.320.peg.286	65058.321.peg.107	65058.322.peg.355	65058.323.peg.362	65058.229.peg.293	2320431.9.peg.1657	2320431.16.peg.1659	2320431.10.peg.1660	2320431.17.peg.1661	2320431.13.peg.1661	2320431.14.peg.1658	2320431.12.peg.1660	2320431.15.peg.1661	65058.241.peg.365
	335	65058.435.peg.425	65058.432.peg.406	2320431.4.peg.403	2320431.3.peg.410	65058.401.peg.402	65058.405.peg.284	65058.406.peg.362	65058.410.peg.403	65058.411.peg.363	65058.370.peg.283	65058.373.peg.283	65058.374.peg.287	65058.375.peg.288	65058.376.peg.403	65058.437.peg.265	65058.385.peg.360	65058.419.peg.284	65058.361.peg.404	65058.362.peg.284	65058.363.peg.405	65058.420.peg.408	65058.421.peg.284	65058.428.peg.284	65058.426.peg.285	65058.313.peg.404	65058.314.peg.107	65058.315.peg.177	65058.316.peg.405	2320456.3.peg.409	65058.317.peg.401	65058.318.peg.362	65058.319.peg.361	65058.320.peg.287	65058.321.peg.106	65058.322.peg.354	65058.323.peg.361	65058.229.peg.294	2320431.9.peg.1656	2320431.16.peg.1658	2320431.10.peg.1659	2320431.17.peg.1660	2320431.13.peg.1660	2320431.14.peg.1657	2320431.12.peg.1659	2320431.15.peg.1660	65058.241.peg.366
	336	65058.435.peg.426	65058.432.peg.407	2320431.4.peg.402	2320431.3.peg.409	65058.401.peg.401	65058.405.peg.285	65058.406.peg.361	65058.410.peg.402	65058.411.peg.362	65058.370.peg.284	65058.373.peg.284	65058.374.peg.288	65058.375.peg.289	65058.376.peg.402	65058.437.peg.266	65058.385.peg.359	65058.419.peg.285	65058.361.peg.403	65058.362.peg.285	65058.363.peg.404	65058.420.peg.407	65058.421.peg.285	65058.428.peg.285	65058.426.peg.286	65058.313.peg.403	65058.314.peg.108	65058.315.peg.176	65058.316.peg.404	2320456.3.peg.408	65058.317.peg.400	65058.318.peg.361	65058.319.peg.360	65058.320.peg.288	65058.321.peg.105	65058.322.peg.353	65058.323.peg.360	65058.229.peg.295	2320431.9.peg.1655	2320431.16.peg.1657	2320431.10.peg.1658	2320431.17.peg.1659	2320431.13.peg.1659	2320431.14.peg.1656	2320431.12.peg.1658	2320431.15.peg.1659	65058.241.peg.367
	337	65058.435.peg.427	65058.432.peg.408	2320431.4.peg.401	2320431.3.peg.408	65058.401.peg.400	65058.405.peg.286	65058.406.peg.360	65058.410.peg.401	65058.411.peg.361	65058.370.peg.285	65058.373.peg.285	65058.374.peg.289	65058.375.peg.290	65058.376.peg.401	65058.437.peg.267	65058.385.peg.358	65058.419.peg.286	65058.361.peg.402	65058.362.peg.286	65058.363.peg.403	65058.420.peg.406	65058.421.peg.286	65058.428.peg.286	65058.426.peg.287	65058.313.peg.402	65058.314.peg.109	65058.315.peg.175	65058.316.peg.403	2320456.3.peg.407	65058.317.peg.399	65058.318.peg.360	65058.319.peg.359	65058.320.peg.289	65058.321.peg.104	65058.322.peg.352	65058.323.peg.359	65058.229.peg.296	2320431.9.peg.1654	2320431.16.peg.1656	2320431.10.peg.1657	2320431.17.peg.1658	2320431.13.peg.1658	2320431.14.peg.1655	2320431.12.peg.1657	2320431.15.peg.1658	65058.241.peg.368
	338	65058.435.peg.429	65058.432.peg.410	2320431.4.peg.399	2320431.3.peg.406	65058.401.peg.398	65058.405.peg.288	65058.406.peg.358	65058.410.peg.399	65058.411.peg.359	65058.370.peg.287	65058.373.peg.287	65058.374.peg.291	65058.375.peg.292	65058.376.peg.399	65058.437.peg.269	65058.385.peg.356	65058.419.peg.288	65058.361.peg.400	65058.362.peg.288	65058.363.peg.401	65058.420.peg.404	65058.421.peg.288	65058.428.peg.288	65058.426.peg.289	65058.313.peg.400	65058.314.peg.111	65058.315.peg.173	65058.316.peg.401	2320456.3.peg.405	65058.317.peg.397	65058.318.peg.358	65058.319.peg.357	65058.320.peg.291	65058.321.peg.102	65058.322.peg.350	65058.323.peg.357	65058.229.peg.298	2320431.9.peg.1652	2320431.16.peg.1654	2320431.10.peg.1655	2320431.17.peg.1656	2320431.13.peg.1656	2320431.14.peg.1653	2320431.12.peg.1655	2320431.15.peg.1656	65058.241.peg.370
	339	65058.435.peg.431	65058.432.peg.414	2320431.4.peg.398	2320431.3.peg.403	65058.401.peg.397	65058.405.peg.289	65058.406.peg.357	65058.410.peg.398	65058.411.peg.358	65058.370.peg.288	65058.373.peg.288	65058.374.peg.292	65058.375.peg.293	65058.376.peg.398	65058.437.peg.270	65058.385.peg.355	65058.419.peg.289	65058.361.peg.399	65058.362.peg.291	65058.363.peg.398	65058.420.peg.401	65058.421.peg.289	65058.428.peg.289	65058.426.peg.290	65058.313.peg.397	65058.314.peg.112	65058.315.peg.170	65058.316.peg.397	2320456.3.peg.402	65058.317.peg.396	65058.318.peg.355	65058.319.peg.356	65058.320.peg.294	65058.321.peg.99	65058.322.peg.347	65058.323.peg.354	65058.229.peg.301	2320431.9.peg.1649	2320431.16.peg.1653	2320431.10.peg.1652	2320431.17.peg.1653	2320431.13.peg.1653	2320431.14.peg.1650	2320431.12.peg.1654	2320431.15.peg.1653	65058.241.peg.371
	340	65058.435.peg.433	65058.432.peg.416	2320431.4.peg.396	2320431.3.peg.401	65058.401.peg.395	65058.405.peg.291	65058.406.peg.355	65058.410.peg.396	65058.411.peg.356	65058.370.peg.290	65058.373.peg.290	65058.374.peg.294	65058.375.peg.295	65058.376.peg.396	65058.437.peg.272	65058.385.peg.353	65058.419.peg.291	65058.361.peg.397	65058.362.peg.293	65058.363.peg.396	65058.420.peg.400	65058.421.peg.291	65058.428.peg.291	65058.426.peg.292	65058.313.peg.395	65058.314.peg.114	65058.315.peg.168	65058.316.peg.395	2320456.3.peg.400	65058.317.peg.394	65058.318.peg.353	65058.319.peg.354	65058.320.peg.296	65058.321.peg.97	65058.322.peg.345	65058.323.peg.352	65058.229.peg.303	2320431.9.peg.1648	2320431.16.peg.1651	2320431.10.peg.1651	2320431.17.peg.1651	2320431.13.peg.1651	2320431.14.peg.1648	2320431.12.peg.1652	2320431.15.peg.1651	65058.241.peg.373
	341	65058.435.peg.434	65058.432.peg.417	2320431.4.peg.395	2320431.3.peg.400	65058.401.peg.394	65058.405.peg.292	65058.406.peg.354	65058.410.peg.395	65058.411.peg.355	65058.370.peg.291	65058.373.peg.291	65058.374.peg.295	65058.375.peg.296	65058.376.peg.395	65058.437.peg.273	65058.385.peg.352	65058.419.peg.292	65058.361.peg.396	65058.362.peg.294	65058.363.peg.395	65058.420.peg.399	65058.421.peg.292	65058.428.peg.292	65058.426.peg.293	65058.313.peg.394	65058.314.peg.115	65058.315.peg.167	65058.316.peg.394	2320456.3.peg.399	65058.317.peg.393	65058.318.peg.352	65058.319.peg.353	65058.320.peg.297	65058.321.peg.96	65058.322.peg.344	65058.323.peg.351	65058.229.peg.304	2320431.9.peg.1647	2320431.16.peg.1650	2320431.10.peg.1650	2320431.17.peg.1650	2320431.13.peg.1650	2320431.14.peg.1647	2320431.12.peg.1651	2320431.15.peg.1650	65058.241.peg.374
	342	65058.435.peg.435	65058.432.peg.418	2320431.4.peg.394	2320431.3.peg.399	65058.401.peg.393	65058.405.peg.294	65058.406.peg.353	65058.410.peg.394	65058.411.peg.354	65058.370.peg.292	65058.373.peg.292	65058.374.peg.296	65058.375.peg.297	65058.376.peg.394	65058.437.peg.274	65058.385.peg.351	65058.419.peg.293	65058.361.peg.395	65058.362.peg.295	65058.363.peg.394	65058.420.peg.398	65058.421.peg.293	65058.428.peg.293	65058.426.peg.294	65058.313.peg.393	65058.314.peg.116	65058.315.peg.166	65058.316.peg.393	2320456.3.peg.398	65058.317.peg.392	65058.318.peg.351	65058.319.peg.352	65058.320.peg.298	65058.321.peg.95	65058.322.peg.343	65058.323.peg.350	65058.229.peg.305	2320431.9.peg.1646	2320431.16.peg.1649	2320431.10.peg.1649	2320431.17.peg.1649	2320431.13.peg.1649	2320431.14.peg.1646	2320431.12.peg.1650	2320431.15.peg.1649	65058.241.peg.375
	343	65058.435.peg.436	65058.432.peg.419	2320431.4.peg.393	2320431.3.peg.398	65058.401.peg.392	65058.405.peg.295	65058.406.peg.352	65058.410.peg.393	65058.411.peg.353	65058.370.peg.293	65058.373.peg.293	65058.374.peg.297	65058.375.peg.298	65058.376.peg.393	65058.437.peg.275	65058.385.peg.350	65058.419.peg.294	65058.361.peg.394	65058.362.peg.296	65058.363.peg.393	65058.420.peg.397	65058.421.peg.294	65058.428.peg.294	65058.426.peg.295	65058.313.peg.392	65058.314.peg.117	65058.315.peg.165	65058.316.peg.392	2320456.3.peg.397	65058.317.peg.391	65058.318.peg.350	65058.319.peg.351	65058.320.peg.299	65058.321.peg.94	65058.322.peg.342	65058.323.peg.349	65058.229.peg.306	2320431.9.peg.1645	2320431.16.peg.1648	2320431.10.peg.1648	2320431.17.peg.1648	2320431.13.peg.1648	2320431.14.peg.1645	2320431.12.peg.1649	2320431.15.peg.1648	65058.241.peg.376
	344	65058.435.peg.437	65058.432.peg.420	2320431.4.peg.392	2320431.3.peg.397	65058.401.peg.391	65058.405.peg.296	65058.406.peg.351	65058.410.peg.392	65058.411.peg.352	65058.370.peg.294	65058.373.peg.294	65058.374.peg.298	65058.375.peg.299	65058.376.peg.392	65058.437.peg.276	65058.385.peg.349	65058.419.peg.295	65058.361.peg.393	65058.362.peg.297	65058.363.peg.392	65058.420.peg.396	65058.421.peg.295	65058.428.peg.295	65058.426.peg.296	65058.313.peg.391	65058.314.peg.118	65058.315.peg.164	65058.316.peg.391	2320456.3.peg.396	65058.317.peg.390	65058.318.peg.349	65058.319.peg.350	65058.320.peg.300	65058.321.peg.93	65058.322.peg.341	65058.323.peg.348	65058.229.peg.307	2320431.9.peg.1644	2320431.16.peg.1647	2320431.10.peg.1647	2320431.17.peg.1647	2320431.13.peg.1647	2320431.14.peg.1644	2320431.12.peg.1648	2320431.15.peg.1647	65058.241.peg.377
	345	65058.435.peg.438	65058.432.peg.421	2320431.4.peg.391	2320431.3.peg.396	65058.401.peg.390	65058.405.peg.297	65058.406.peg.350	65058.410.peg.391	65058.411.peg.351	65058.370.peg.295	65058.373.peg.295	65058.374.peg.299	65058.375.peg.300	65058.376.peg.391	65058.437.peg.277	65058.385.peg.348	65058.419.peg.296	65058.361.peg.392	65058.362.peg.298	65058.363.peg.391	65058.420.peg.395	65058.421.peg.296	65058.428.peg.296	65058.426.peg.297	65058.313.peg.390	65058.314.peg.119	65058.315.peg.163	65058.316.peg.390	2320456.3.peg.395	65058.317.peg.389	65058.318.peg.348	65058.319.peg.349	65058.320.peg.301	65058.321.peg.92	65058.322.peg.340	65058.323.peg.347	65058.229.peg.308	2320431.9.peg.1643	2320431.16.peg.1646	2320431.10.peg.1646	2320431.17.peg.1646	2320431.13.peg.1646	2320431.14.peg.1643	2320431.12.peg.1647	2320431.15.peg.1646	65058.241.peg.378
	346	65058.435.peg.439	65058.432.peg.422	2320431.4.peg.390	2320431.3.peg.395	65058.401.peg.389	65058.405.peg.298	65058.406.peg.349	65058.410.peg.390	65058.411.peg.350	65058.370.peg.296	65058.373.peg.296	65058.374.peg.300	65058.375.peg.301	65058.376.peg.390	65058.437.peg.278	65058.385.peg.347	65058.419.peg.297	65058.361.peg.391	65058.362.peg.299	65058.363.peg.390	65058.420.peg.394	65058.421.peg.297	65058.428.peg.297	65058.426.peg.298	65058.313.peg.389	65058.314.peg.120	65058.315.peg.162	65058.316.peg.389	2320456.3.peg.394	65058.317.peg.388	65058.318.peg.347	65058.319.peg.348	65058.320.peg.302	65058.321.peg.91	65058.322.peg.339	65058.323.peg.346	65058.229.peg.309	2320431.9.peg.1642	2320431.16.peg.1645	2320431.10.peg.1645	2320431.17.peg.1645	2320431.13.peg.1645	2320431.14.peg.1642	2320431.12.peg.1646	2320431.15.peg.1645	65058.241.peg.379
	347	65058.435.peg.440	65058.432.peg.423	2320431.4.peg.389	2320431.3.peg.394	65058.401.peg.388	65058.405.peg.299	65058.406.peg.348	65058.410.peg.389	65058.411.peg.349	65058.370.peg.297	65058.373.peg.297	65058.374.peg.301	65058.375.peg.302	65058.376.peg.389	65058.437.peg.279	65058.385.peg.346	65058.419.peg.298	65058.361.peg.390	65058.362.peg.300	65058.363.peg.389	65058.420.peg.393	65058.421.peg.298	65058.428.peg.298	65058.426.peg.299	65058.313.peg.388	65058.314.peg.121	65058.315.peg.161	65058.316.peg.388	2320456.3.peg.393	65058.317.peg.387	65058.318.peg.346	65058.319.peg.347	65058.320.peg.303	65058.321.peg.90	65058.322.peg.338	65058.323.peg.345	65058.229.peg.310	2320431.9.peg.1641	2320431.16.peg.1644	2320431.10.peg.1644	2320431.17.peg.1644	2320431.13.peg.1644	2320431.14.peg.1641	2320431.12.peg.1645	2320431.15.peg.1644	65058.241.peg.380
	348	65058.435.peg.441	65058.432.peg.424	2320431.4.peg.388	2320431.3.peg.393	65058.401.peg.387	65058.405.peg.300	65058.406.peg.347	65058.410.peg.388	65058.411.peg.348	65058.370.peg.298	65058.373.peg.298	65058.374.peg.302	65058.375.peg.303	65058.376.peg.388	65058.437.peg.280	65058.385.peg.345	65058.419.peg.299	65058.361.peg.389	65058.362.peg.301	65058.363.peg.388	65058.420.peg.392	65058.421.peg.299	65058.428.peg.299	65058.426.peg.300	65058.313.peg.387	65058.314.peg.122	65058.315.peg.160	65058.316.peg.387	2320456.3.peg.392	65058.317.peg.386	65058.318.peg.345	65058.319.peg.346	65058.320.peg.304	65058.321.peg.89	65058.322.peg.337	65058.323.peg.344	65058.229.peg.311	2320431.9.peg.1640	2320431.16.peg.1643	2320431.10.peg.1643	2320431.17.peg.1643	2320431.13.peg.1643	2320431.14.peg.1640	2320431.12.peg.1644	2320431.15.peg.1643	65058.241.peg.381
	349	65058.435.peg.442	65058.432.peg.425	2320431.4.peg.387	2320431.3.peg.392	65058.401.peg.386	65058.405.peg.301	65058.406.peg.346	65058.410.peg.387	65058.411.peg.347	65058.370.peg.299	65058.373.peg.299	65058.374.peg.303	65058.375.peg.304	65058.376.peg.387	65058.437.peg.281	65058.385.peg.344	65058.419.peg.300	65058.361.peg.388	65058.362.peg.302	65058.363.peg.387	65058.420.peg.391	65058.421.peg.300	65058.428.peg.300	65058.426.peg.301	65058.313.peg.386	65058.314.peg.123	65058.315.peg.159	65058.316.peg.386	2320456.3.peg.391	65058.317.peg.385	65058.318.peg.344	65058.319.peg.345	65058.320.peg.305	65058.321.peg.88	65058.322.peg.336	65058.323.peg.343	65058.229.peg.312	2320431.9.peg.1639	2320431.16.peg.1642	2320431.10.peg.1642	2320431.17.peg.1642	2320431.13.peg.1642	2320431.14.peg.1639	2320431.12.peg.1643	2320431.15.peg.1642	65058.241.peg.382
	350	65058.435.peg.443	65058.432.peg.426	2320431.4.peg.386	2320431.3.peg.391	65058.401.peg.385	65058.405.peg.302	65058.406.peg.345	65058.410.peg.386	65058.411.peg.346	65058.370.peg.300	65058.373.peg.300	65058.374.peg.304	65058.375.peg.305	65058.376.peg.386	65058.437.peg.282	65058.385.peg.343	65058.419.peg.301	65058.361.peg.387	65058.362.peg.303	65058.363.peg.386	65058.420.peg.390	65058.421.peg.301	65058.428.peg.301	65058.426.peg.302	65058.313.peg.385	65058.314.peg.124	65058.315.peg.158	65058.316.peg.385	2320456.3.peg.390	65058.317.peg.384	65058.318.peg.343	65058.319.peg.344	65058.320.peg.306	65058.321.peg.87	65058.322.peg.335	65058.323.peg.342	65058.229.peg.313	2320431.9.peg.1638	2320431.16.peg.1641	2320431.10.peg.1641	2320431.17.peg.1641	2320431.13.peg.1641	2320431.14.peg.1638	2320431.12.peg.1642	2320431.15.peg.1641	65058.241.peg.383
	351	65058.435.peg.444	65058.432.peg.427	2320431.4.peg.385	2320431.3.peg.390	65058.401.peg.384	65058.405.peg.303	65058.406.peg.344	65058.410.peg.385	65058.411.peg.345	65058.370.peg.301	65058.373.peg.301	65058.374.peg.305	65058.375.peg.306	65058.376.peg.385	65058.437.peg.283	65058.385.peg.342	65058.419.peg.302	65058.361.peg.386	65058.362.peg.304	65058.363.peg.385	65058.420.peg.389	65058.421.peg.302	65058.428.peg.302	65058.426.peg.303	65058.313.peg.384	65058.314.peg.125	65058.315.peg.157	65058.316.peg.384	2320456.3.peg.389	65058.317.peg.383	65058.318.peg.342	65058.319.peg.343	65058.320.peg.307	65058.321.peg.86	65058.322.peg.334	65058.323.peg.341	65058.229.peg.314	2320431.9.peg.1637	2320431.16.peg.1640	2320431.10.peg.1640	2320431.17.peg.1640	2320431.13.peg.1640	2320431.14.peg.1637	2320431.12.peg.1641	2320431.15.peg.1640	65058.241.peg.384
	352	65058.435.peg.445	65058.432.peg.428	2320431.4.peg.384	2320431.3.peg.389	65058.401.peg.383	65058.405.peg.304	65058.406.peg.343	65058.410.peg.384	65058.411.peg.344	65058.370.peg.302	65058.373.peg.302	65058.374.peg.306	65058.375.peg.307	65058.376.peg.384	65058.437.peg.284	65058.385.peg.341	65058.419.peg.303	65058.361.peg.385	65058.362.peg.305	65058.363.peg.384	65058.420.peg.388	65058.421.peg.303	65058.428.peg.303	65058.426.peg.304	65058.313.peg.383	65058.314.peg.126	65058.315.peg.156	65058.316.peg.383	2320456.3.peg.388	65058.317.peg.382	65058.318.peg.341	65058.319.peg.342	65058.320.peg.308	65058.321.peg.85	65058.322.peg.333	65058.323.peg.340	65058.229.peg.315	2320431.9.peg.1636	2320431.16.peg.1639	2320431.10.peg.1639	2320431.17.peg.1639	2320431.13.peg.1639	2320431.14.peg.1636	2320431.12.peg.1640	2320431.15.peg.1639	65058.241.peg.385
	353	65058.435.peg.446	65058.432.peg.429	2320431.4.peg.383	2320431.3.peg.388	65058.401.peg.382	65058.405.peg.305	65058.406.peg.342	65058.410.peg.383	65058.411.peg.343	65058.370.peg.303	65058.373.peg.303	65058.374.peg.307	65058.375.peg.308	65058.376.peg.383	65058.437.peg.285	65058.385.peg.340	65058.419.peg.304	65058.361.peg.384	65058.362.peg.306	65058.363.peg.383	65058.420.peg.387	65058.421.peg.304	65058.428.peg.304	65058.426.peg.305	65058.313.peg.382	65058.314.peg.127	65058.315.peg.155	65058.316.peg.382	2320456.3.peg.387	65058.317.peg.381	65058.318.peg.340	65058.319.peg.341	65058.320.peg.309	65058.321.peg.84	65058.322.peg.332	65058.323.peg.339	65058.229.peg.316	2320431.9.peg.1635	2320431.16.peg.1638	2320431.10.peg.1638	2320431.17.peg.1638	2320431.13.peg.1638	2320431.14.peg.1635	2320431.12.peg.1639	2320431.15.peg.1638	65058.241.peg.386
	354	65058.435.peg.447	65058.432.peg.430	2320431.4.peg.382	2320431.3.peg.387	65058.401.peg.381	65058.405.peg.306	65058.406.peg.341	65058.410.peg.382	65058.411.peg.342	65058.370.peg.304	65058.373.peg.304	65058.374.peg.308	65058.375.peg.309	65058.376.peg.382	65058.437.peg.286	65058.385.peg.339	65058.419.peg.305	65058.361.peg.383	65058.362.peg.307	65058.363.peg.382	65058.420.peg.386	65058.421.peg.305	65058.428.peg.305	65058.426.peg.306	65058.313.peg.381	65058.314.peg.128	65058.315.peg.154	65058.316.peg.381	2320456.3.peg.386	65058.317.peg.380	65058.318.peg.339	65058.319.peg.340	65058.320.peg.310	65058.321.peg.83	65058.322.peg.331	65058.323.peg.338	65058.229.peg.317	2320431.9.peg.1634	2320431.16.peg.1637	2320431.10.peg.1637	2320431.17.peg.1637	2320431.13.peg.1637	2320431.14.peg.1634	2320431.12.peg.1638	2320431.15.peg.1637	65058.241.peg.387
	355	65058.435.peg.448	65058.432.peg.431	2320431.4.peg.381	2320431.3.peg.386	65058.401.peg.380	65058.405.peg.307	65058.406.peg.340	65058.410.peg.381	65058.411.peg.341	65058.370.peg.305	65058.373.peg.305	65058.374.peg.309	65058.375.peg.310	65058.376.peg.381	65058.437.peg.287	65058.385.peg.338	65058.419.peg.306	65058.361.peg.382	65058.362.peg.308	65058.363.peg.381	65058.420.peg.385	65058.421.peg.306	65058.428.peg.306	65058.426.peg.307	65058.313.peg.380	65058.314.peg.129	65058.315.peg.153	65058.316.peg.380	2320456.3.peg.385	65058.317.peg.379	65058.318.peg.338	65058.319.peg.339	65058.320.peg.311	65058.321.peg.82	65058.322.peg.330	65058.323.peg.337	65058.229.peg.318	2320431.9.peg.1633	2320431.16.peg.1636	2320431.10.peg.1636	2320431.17.peg.1636	2320431.13.peg.1636	2320431.14.peg.1633	2320431.12.peg.1637	2320431.15.peg.1636	65058.241.peg.388
	356	65058.435.peg.449	65058.432.peg.432	2320431.4.peg.380	2320431.3.peg.385	65058.401.peg.379	65058.405.peg.308	65058.406.peg.339	65058.410.peg.380	65058.411.peg.340	65058.370.peg.306	65058.373.peg.306	65058.374.peg.310	65058.375.peg.311	65058.376.peg.380	65058.437.peg.288	65058.385.peg.337	65058.419.peg.307	65058.361.peg.381	65058.362.peg.309	65058.363.peg.380	65058.420.peg.384	65058.421.peg.307	65058.428.peg.307	65058.426.peg.308	65058.313.peg.379	65058.314.peg.130	65058.315.peg.152	65058.316.peg.379	2320456.3.peg.384	65058.317.peg.378	65058.318.peg.337	65058.319.peg.338	65058.320.peg.312	65058.321.peg.81	65058.322.peg.329	65058.323.peg.336	65058.229.peg.319	2320431.9.peg.1632	2320431.16.peg.1635	2320431.10.peg.1635	2320431.17.peg.1635	2320431.13.peg.1635	2320431.14.peg.1632	2320431.12.peg.1636	2320431.15.peg.1635	65058.241.peg.389
	357	65058.435.peg.450	65058.432.peg.433	2320431.4.peg.379	2320431.3.peg.384	65058.401.peg.378	65058.405.peg.309	65058.406.peg.338	65058.410.peg.379	65058.411.peg.339	65058.370.peg.308	65058.373.peg.308	65058.374.peg.312	65058.375.peg.312	65058.376.peg.379	65058.437.peg.289	65058.385.peg.336	65058.419.peg.309	65058.361.peg.380	65058.362.peg.310	65058.363.peg.379	65058.420.peg.383	65058.421.peg.308	65058.428.peg.308	65058.426.peg.309	65058.313.peg.378	65058.314.peg.132	65058.315.peg.150	65058.316.peg.377	2320456.3.peg.383	65058.317.peg.377	65058.318.peg.336	65058.319.peg.337	65058.320.peg.314	65058.321.peg.79	65058.322.peg.328	65058.323.peg.334	65058.229.peg.320	2320431.9.peg.1631	2320431.16.peg.1634	2320431.10.peg.1634	2320431.17.peg.1634	2320431.13.peg.1634	2320431.14.peg.1631	2320431.12.peg.1635	2320431.15.peg.1634	65058.241.peg.390
	358	65058.435.peg.451	65058.432.peg.434	2320431.4.peg.378	2320431.3.peg.383	65058.401.peg.377	65058.405.peg.310	65058.406.peg.337	65058.410.peg.378	65058.411.peg.338	65058.370.peg.309	65058.373.peg.309	65058.374.peg.313	65058.375.peg.313	65058.376.peg.378	65058.437.peg.290	65058.385.peg.335	65058.419.peg.310	65058.361.peg.379	65058.362.peg.311	65058.363.peg.378	65058.420.peg.382	65058.421.peg.309	65058.428.peg.309	65058.426.peg.310	65058.313.peg.377	65058.314.peg.133	65058.315.peg.149	65058.316.peg.376	2320456.3.peg.382	65058.317.peg.376	65058.318.peg.335	65058.319.peg.336	65058.320.peg.315	65058.321.peg.78	65058.322.peg.327	65058.323.peg.333	65058.229.peg.321	2320431.9.peg.1630	2320431.16.peg.1633	2320431.10.peg.1633	2320431.17.peg.1633	2320431.13.peg.1633	2320431.14.peg.1630	2320431.12.peg.1634	2320431.15.peg.1633	65058.241.peg.391
	359	65058.435.peg.452	65058.432.peg.435	2320431.4.peg.377	2320431.3.peg.382	65058.401.peg.376	65058.405.peg.311	65058.406.peg.336	65058.410.peg.377	65058.411.peg.337	65058.370.peg.310	65058.373.peg.310	65058.374.peg.314	65058.375.peg.314	65058.376.peg.377	65058.437.peg.291	65058.385.peg.334	65058.419.peg.311	65058.361.peg.378	65058.362.peg.312	65058.363.peg.377	65058.420.peg.381	65058.421.peg.310	65058.428.peg.310	65058.426.peg.311	65058.313.peg.376	65058.314.peg.134	65058.315.peg.148	65058.316.peg.375	2320456.3.peg.381	65058.317.peg.375	65058.318.peg.334	65058.319.peg.335	65058.320.peg.316	65058.321.peg.77	65058.322.peg.326	65058.323.peg.332	65058.229.peg.322	2320431.9.peg.1629	2320431.16.peg.1632	2320431.10.peg.1632	2320431.17.peg.1632	2320431.13.peg.1632	2320431.14.peg.1629	2320431.12.peg.1633	2320431.15.peg.1632	65058.241.peg.392
	360	65058.435.peg.453	65058.432.peg.436	2320431.4.peg.376	2320431.3.peg.381	65058.401.peg.375	65058.405.peg.312	65058.406.peg.335	65058.410.peg.376	65058.411.peg.336	65058.370.peg.311	65058.373.peg.311	65058.374.peg.315	65058.375.peg.315	65058.376.peg.376	65058.437.peg.292	65058.385.peg.333	65058.419.peg.312	65058.361.peg.377	65058.362.peg.313	65058.363.peg.376	65058.420.peg.379	65058.421.peg.311	65058.428.peg.311	65058.426.peg.312	65058.313.peg.375	65058.314.peg.135	65058.315.peg.147	65058.316.peg.374	2320456.3.peg.380	65058.317.peg.374	65058.318.peg.333	65058.319.peg.334	65058.320.peg.317	65058.321.peg.76	65058.322.peg.325	65058.323.peg.331	65058.229.peg.323	2320431.9.peg.1628	2320431.16.peg.1631	2320431.10.peg.1631	2320431.17.peg.1631	2320431.13.peg.1631	2320431.14.peg.1628	2320431.12.peg.1632	2320431.15.peg.1631	65058.241.peg.393
	361	65058.435.peg.454	65058.432.peg.437	2320431.4.peg.375	2320431.3.peg.380	65058.401.peg.374	65058.405.peg.313	65058.406.peg.334	65058.410.peg.375	65058.411.peg.335	65058.370.peg.312	65058.373.peg.312	65058.374.peg.316	65058.375.peg.316	65058.376.peg.375	65058.437.peg.293	65058.385.peg.332	65058.419.peg.313	65058.361.peg.376	65058.362.peg.314	65058.363.peg.375	65058.420.peg.378	65058.421.peg.312	65058.428.peg.312	65058.426.peg.313	65058.313.peg.374	65058.314.peg.136	65058.315.peg.146	65058.316.peg.373	2320456.3.peg.379	65058.317.peg.373	65058.318.peg.332	65058.319.peg.333	65058.320.peg.318	65058.321.peg.75	65058.322.peg.324	65058.323.peg.330	65058.229.peg.324	2320431.9.peg.1627	2320431.16.peg.1630	2320431.10.peg.1630	2320431.17.peg.1630	2320431.13.peg.1630	2320431.14.peg.1627	2320431.12.peg.1631	2320431.15.peg.1630	65058.241.peg.394
	362	65058.435.peg.455	65058.432.peg.438	2320431.4.peg.374	2320431.3.peg.379	65058.401.peg.373	65058.405.peg.314	65058.406.peg.333	65058.410.peg.374	65058.411.peg.334	65058.370.peg.313	65058.373.peg.313	65058.374.peg.317	65058.375.peg.317	65058.376.peg.374	65058.437.peg.294	65058.385.peg.331	65058.419.peg.314	65058.361.peg.375	65058.362.peg.315	65058.363.peg.374	65058.420.peg.377	65058.421.peg.313	65058.428.peg.313	65058.426.peg.314	65058.313.peg.373	65058.314.peg.137	65058.315.peg.145	65058.316.peg.372	2320456.3.peg.378	65058.317.peg.372	65058.318.peg.331	65058.319.peg.332	65058.320.peg.319	65058.321.peg.74	65058.322.peg.323	65058.323.peg.329	65058.229.peg.325	2320431.9.peg.1626	2320431.16.peg.1629	2320431.10.peg.1629	2320431.17.peg.1629	2320431.13.peg.1629	2320431.14.peg.1626	2320431.12.peg.1630	2320431.15.peg.1629	65058.241.peg.395
	363	65058.435.peg.456	65058.432.peg.439	2320431.4.peg.373	2320431.3.peg.378	65058.401.peg.372	65058.405.peg.315	65058.406.peg.332	65058.410.peg.373	65058.411.peg.333	65058.370.peg.314	65058.373.peg.314	65058.374.peg.318	65058.375.peg.318	65058.376.peg.373	65058.437.peg.295	65058.385.peg.330	65058.419.peg.315	65058.361.peg.374	65058.362.peg.316	65058.363.peg.373	65058.420.peg.376	65058.421.peg.314	65058.428.peg.314	65058.426.peg.315	65058.313.peg.372	65058.314.peg.138	65058.315.peg.144	65058.316.peg.371	2320456.3.peg.377	65058.317.peg.371	65058.318.peg.330	65058.319.peg.331	65058.320.peg.320	65058.321.peg.73	65058.322.peg.322	65058.323.peg.328	65058.229.peg.326	2320431.9.peg.1625	2320431.16.peg.1628	2320431.10.peg.1628	2320431.17.peg.1628	2320431.13.peg.1628	2320431.14.peg.1625	2320431.12.peg.1629	2320431.15.peg.1628	65058.241.peg.396
	364	65058.435.peg.457	65058.432.peg.440	2320431.4.peg.372	2320431.3.peg.377	65058.401.peg.371	65058.405.peg.316	65058.406.peg.331	65058.410.peg.372	65058.411.peg.332	65058.370.peg.315	65058.373.peg.315	65058.374.peg.319	65058.375.peg.319	65058.376.peg.372	65058.437.peg.296	65058.385.peg.329	65058.419.peg.316	65058.361.peg.373	65058.362.peg.317	65058.363.peg.372	65058.420.peg.375	65058.421.peg.315	65058.428.peg.315	65058.426.peg.316	65058.313.peg.371	65058.314.peg.139	65058.315.peg.143	65058.316.peg.370	2320456.3.peg.376	65058.317.peg.370	65058.318.peg.329	65058.319.peg.330	65058.320.peg.321	65058.321.peg.72	65058.322.peg.321	65058.323.peg.327	65058.229.peg.327	2320431.9.peg.1624	2320431.16.peg.1627	2320431.10.peg.1627	2320431.17.peg.1627	2320431.13.peg.1627	2320431.14.peg.1624	2320431.12.peg.1628	2320431.15.peg.1627	65058.241.peg.397
	365	65058.435.peg.458	65058.432.peg.441	2320431.4.peg.371	2320431.3.peg.376	65058.401.peg.370	65058.405.peg.317	65058.406.peg.330	65058.410.peg.371	65058.411.peg.331	65058.370.peg.316	65058.373.peg.316	65058.374.peg.320	65058.375.peg.320	65058.376.peg.371	65058.437.peg.297	65058.385.peg.328	65058.419.peg.317	65058.361.peg.372	65058.362.peg.318	65058.363.peg.371	65058.420.peg.374	65058.421.peg.316	65058.428.peg.316	65058.426.peg.317	65058.313.peg.370	65058.314.peg.140	65058.315.peg.142	65058.316.peg.369	2320456.3.peg.375	65058.317.peg.369	65058.318.peg.328	65058.319.peg.329	65058.320.peg.322	65058.321.peg.71	65058.322.peg.320	65058.323.peg.326	65058.229.peg.328	2320431.9.peg.1623	2320431.16.peg.1626	2320431.10.peg.1626	2320431.17.peg.1626	2320431.13.peg.1626	2320431.14.peg.1623	2320431.12.peg.1627	2320431.15.peg.1626	65058.241.peg.398
	366	65058.435.peg.459	65058.432.peg.442	2320431.4.peg.370	2320431.3.peg.375	65058.401.peg.369	65058.405.peg.318	65058.406.peg.329	65058.410.peg.370	65058.411.peg.330	65058.370.peg.317	65058.373.peg.317	65058.374.peg.321	65058.375.peg.321	65058.376.peg.370	65058.437.peg.298	65058.385.peg.327	65058.419.peg.318	65058.361.peg.371	65058.362.peg.319	65058.363.peg.370	65058.420.peg.373	65058.421.peg.317	65058.428.peg.317	65058.426.peg.318	65058.313.peg.369	65058.314.peg.141	65058.315.peg.141	65058.316.peg.368	2320456.3.peg.374	65058.317.peg.368	65058.318.peg.327	65058.319.peg.328	65058.320.peg.323	65058.321.peg.70	65058.322.peg.319	65058.323.peg.325	65058.229.peg.329	2320431.9.peg.1622	2320431.16.peg.1625	2320431.10.peg.1625	2320431.17.peg.1625	2320431.13.peg.1625	2320431.14.peg.1622	2320431.12.peg.1626	2320431.15.peg.1625	65058.241.peg.399
	367	65058.435.peg.460	65058.432.peg.443	2320431.4.peg.369	2320431.3.peg.374	65058.401.peg.368	65058.405.peg.319	65058.406.peg.328	65058.410.peg.369	65058.411.peg.329	65058.370.peg.318	65058.373.peg.318	65058.374.peg.322	65058.375.peg.322	65058.376.peg.369	65058.437.peg.299	65058.385.peg.326	65058.419.peg.319	65058.361.peg.370	65058.362.peg.320	65058.363.peg.369	65058.420.peg.372	65058.421.peg.318	65058.428.peg.318	65058.426.peg.319	65058.313.peg.368	65058.314.peg.142	65058.315.peg.140	65058.316.peg.367	2320456.3.peg.373	65058.317.peg.367	65058.318.peg.326	65058.319.peg.327	65058.320.peg.324	65058.321.peg.69	65058.322.peg.318	65058.323.peg.324	65058.229.peg.330	2320431.9.peg.1621	2320431.16.peg.1624	2320431.10.peg.1624	2320431.17.peg.1624	2320431.13.peg.1624	2320431.14.peg.1621	2320431.12.peg.1625	2320431.15.peg.1624	65058.241.peg.400
	368	65058.435.peg.461	65058.432.peg.444	2320431.4.peg.368	2320431.3.peg.373	65058.401.peg.367	65058.405.peg.320	65058.406.peg.327	65058.410.peg.368	65058.411.peg.328	65058.370.peg.319	65058.373.peg.319	65058.374.peg.323	65058.375.peg.323	65058.376.peg.368	65058.437.peg.300	65058.385.peg.325	65058.419.peg.320	65058.361.peg.369	65058.362.peg.321	65058.363.peg.368	65058.420.peg.371	65058.421.peg.319	65058.428.peg.319	65058.426.peg.320	65058.313.peg.367	65058.314.peg.143	65058.315.peg.139	65058.316.peg.366	2320456.3.peg.372	65058.317.peg.366	65058.318.peg.325	65058.319.peg.326	65058.320.peg.325	65058.321.peg.68	65058.322.peg.317	65058.323.peg.323	65058.229.peg.331	2320431.9.peg.1620	2320431.16.peg.1623	2320431.10.peg.1623	2320431.17.peg.1623	2320431.13.peg.1623	2320431.14.peg.1620	2320431.12.peg.1624	2320431.15.peg.1623	65058.241.peg.401
	369	65058.435.peg.462	65058.432.peg.445	2320431.4.peg.367	2320431.3.peg.372	65058.401.peg.366	65058.405.peg.321	65058.406.peg.326	65058.410.peg.367	65058.411.peg.327	65058.370.peg.320	65058.373.peg.320	65058.374.peg.324	65058.375.peg.324	65058.376.peg.367	65058.437.peg.301	65058.385.peg.324	65058.419.peg.321	65058.361.peg.368	65058.362.peg.322	65058.363.peg.367	65058.420.peg.370	65058.421.peg.320	65058.428.peg.320	65058.426.peg.321	65058.313.peg.366	65058.314.peg.144	65058.315.peg.138	65058.316.peg.365	2320456.3.peg.371	65058.317.peg.365	65058.318.peg.324	65058.319.peg.325	65058.320.peg.326	65058.321.peg.67	65058.322.peg.316	65058.323.peg.322	65058.229.peg.332	2320431.9.peg.1619	2320431.16.peg.1622	2320431.10.peg.1622	2320431.17.peg.1622	2320431.13.peg.1622	2320431.14.peg.1619	2320431.12.peg.1623	2320431.15.peg.1622	65058.241.peg.402
	370	65058.435.peg.463	65058.432.peg.446	2320431.4.peg.366	2320431.3.peg.371	65058.401.peg.365	65058.405.peg.322	65058.406.peg.325	65058.410.peg.366	65058.411.peg.326	65058.370.peg.321	65058.373.peg.321	65058.374.peg.325	65058.375.peg.325	65058.376.peg.366	65058.437.peg.302	65058.385.peg.323	65058.419.peg.322	65058.361.peg.367	65058.362.peg.323	65058.363.peg.366	65058.420.peg.369	65058.421.peg.321	65058.428.peg.321	65058.426.peg.322	65058.313.peg.365	65058.314.peg.145	65058.315.peg.137	65058.316.peg.364	2320456.3.peg.370	65058.317.peg.364	65058.318.peg.323	65058.319.peg.324	65058.320.peg.327	65058.321.peg.66	65058.322.peg.315	65058.323.peg.321	65058.229.peg.333	2320431.9.peg.1618	2320431.16.peg.1621	2320431.10.peg.1621	2320431.17.peg.1621	2320431.13.peg.1621	2320431.14.peg.1618	2320431.12.peg.1622	2320431.15.peg.1621	65058.241.peg.403
	371	65058.435.peg.464	65058.432.peg.447	2320431.4.peg.365	2320431.3.peg.370	65058.401.peg.364	65058.405.peg.323	65058.406.peg.324	65058.410.peg.365	65058.411.peg.325	65058.370.peg.322	65058.373.peg.322	65058.374.peg.326	65058.375.peg.326	65058.376.peg.365	65058.437.peg.303	65058.385.peg.322	65058.419.peg.323	65058.361.peg.366	65058.362.peg.324	65058.363.peg.365	65058.420.peg.368	65058.421.peg.322	65058.428.peg.322	65058.426.peg.323	65058.313.peg.364	65058.314.peg.146	65058.315.peg.136	65058.316.peg.363	2320456.3.peg.369	65058.317.peg.363	65058.318.peg.322	65058.319.peg.323	65058.320.peg.328	65058.321.peg.65	65058.322.peg.314	65058.323.peg.320	65058.229.peg.334	2320431.9.peg.1617	2320431.16.peg.1620	2320431.10.peg.1620	2320431.17.peg.1620	2320431.13.peg.1620	2320431.14.peg.1617	2320431.12.peg.1621	2320431.15.peg.1620	65058.241.peg.404
	372	65058.435.peg.465	65058.432.peg.448	2320431.4.peg.364	2320431.3.peg.369	65058.401.peg.363	65058.405.peg.324	65058.406.peg.323	65058.410.peg.364	65058.411.peg.324	65058.370.peg.323	65058.373.peg.323	65058.374.peg.327	65058.375.peg.327	65058.376.peg.364	65058.437.peg.304	65058.385.peg.321	65058.419.peg.324	65058.361.peg.365	65058.362.peg.325	65058.363.peg.364	65058.420.peg.367	65058.421.peg.323	65058.428.peg.323	65058.426.peg.324	65058.313.peg.363	65058.314.peg.147	65058.315.peg.135	65058.316.peg.362	2320456.3.peg.368	65058.317.peg.362	65058.318.peg.321	65058.319.peg.322	65058.320.peg.329	65058.321.peg.64	65058.322.peg.313	65058.323.peg.319	65058.229.peg.335	2320431.9.peg.1616	2320431.16.peg.1619	2320431.10.peg.1619	2320431.17.peg.1619	2320431.13.peg.1619	2320431.14.peg.1616	2320431.12.peg.1620	2320431.15.peg.1619	65058.241.peg.405
	373	65058.435.peg.466	65058.432.peg.449	2320431.4.peg.363	2320431.3.peg.368	65058.401.peg.362	65058.405.peg.325	65058.406.peg.322	65058.410.peg.363	65058.411.peg.323	65058.370.peg.324	65058.373.peg.324	65058.374.peg.328	65058.375.peg.328	65058.376.peg.363	65058.437.peg.305	65058.385.peg.320	65058.419.peg.325	65058.361.peg.364	65058.362.peg.326	65058.363.peg.363	65058.420.peg.366	65058.421.peg.324	65058.428.peg.324	65058.426.peg.325	65058.313.peg.362	65058.314.peg.148	65058.315.peg.134	65058.316.peg.361	2320456.3.peg.367	65058.317.peg.361	65058.318.peg.320	65058.319.peg.321	65058.320.peg.330	65058.321.peg.63	65058.322.peg.312	65058.323.peg.318	65058.229.peg.336	2320431.9.peg.1615	2320431.16.peg.1618	2320431.10.peg.1618	2320431.17.peg.1618	2320431.13.peg.1618	2320431.14.peg.1615	2320431.12.peg.1619	2320431.15.peg.1618	65058.241.peg.406
	374	65058.435.peg.467	65058.432.peg.450	2320431.4.peg.362	2320431.3.peg.367	65058.401.peg.361	65058.405.peg.326	65058.406.peg.321	65058.410.peg.362	65058.411.peg.322	65058.370.peg.325	65058.373.peg.325	65058.374.peg.329	65058.375.peg.329	65058.376.peg.362	65058.437.peg.306	65058.385.peg.319	65058.419.peg.326	65058.361.peg.363	65058.362.peg.327	65058.363.peg.362	65058.420.peg.365	65058.421.peg.325	65058.428.peg.325	65058.426.peg.326	65058.313.peg.361	65058.314.peg.149	65058.315.peg.133	65058.316.peg.360	2320456.3.peg.366	65058.317.peg.360	65058.318.peg.319	65058.319.peg.320	65058.320.peg.331	65058.321.peg.62	65058.322.peg.311	65058.323.peg.317	65058.229.peg.337	2320431.9.peg.1614	2320431.16.peg.1617	2320431.10.peg.1617	2320431.17.peg.1617	2320431.13.peg.1617	2320431.14.peg.1614	2320431.12.peg.1618	2320431.15.peg.1617	65058.241.peg.407
	375	65058.435.peg.468	65058.432.peg.451	2320431.4.peg.361	2320431.3.peg.366	65058.401.peg.360	65058.405.peg.327	65058.406.peg.320	65058.410.peg.361	65058.411.peg.321	65058.370.peg.326	65058.373.peg.326	65058.374.peg.330	65058.375.peg.330	65058.376.peg.361	65058.437.peg.307	65058.385.peg.318	65058.419.peg.327	65058.361.peg.362	65058.362.peg.328	65058.363.peg.361	65058.420.peg.364	65058.421.peg.326	65058.428.peg.326	65058.426.peg.327	65058.313.peg.360	65058.314.peg.150	65058.315.peg.132	65058.316.peg.359	2320456.3.peg.365	65058.317.peg.359	65058.318.peg.318	65058.319.peg.319	65058.320.peg.332	65058.321.peg.61	65058.322.peg.310	65058.323.peg.316	65058.229.peg.338	2320431.9.peg.1613	2320431.16.peg.1616	2320431.10.peg.1616	2320431.17.peg.1616	2320431.13.peg.1616	2320431.14.peg.1613	2320431.12.peg.1617	2320431.15.peg.1616	65058.241.peg.408
	376	65058.435.peg.469	65058.432.peg.452	2320431.4.peg.360	2320431.3.peg.365	65058.401.peg.359	65058.405.peg.328	65058.406.peg.319	65058.410.peg.360	65058.411.peg.320	65058.370.peg.327	65058.373.peg.327	65058.374.peg.331	65058.375.peg.331	65058.376.peg.360	65058.437.peg.308	65058.385.peg.317	65058.419.peg.328	65058.361.peg.361	65058.362.peg.329	65058.363.peg.360	65058.420.peg.363	65058.421.peg.327	65058.428.peg.327	65058.426.peg.328	65058.313.peg.359	65058.314.peg.151	65058.315.peg.131	65058.316.peg.358	2320456.3.peg.364	65058.317.peg.358	65058.318.peg.317	65058.319.peg.318	65058.320.peg.333	65058.321.peg.60	65058.322.peg.309	65058.323.peg.315	65058.229.peg.339	2320431.9.peg.1612	2320431.16.peg.1615	2320431.10.peg.1615	2320431.17.peg.1615	2320431.13.peg.1615	2320431.14.peg.1612	2320431.12.peg.1616	2320431.15.peg.1615	65058.241.peg.409
	377	65058.435.peg.470	65058.432.peg.453	2320431.4.peg.359	2320431.3.peg.364	65058.401.peg.358	65058.405.peg.329	65058.406.peg.318	65058.410.peg.359	65058.411.peg.319	65058.370.peg.328	65058.373.peg.328	65058.374.peg.332	65058.375.peg.332	65058.376.peg.359	65058.437.peg.309	65058.385.peg.316	65058.419.peg.329	65058.361.peg.360	65058.362.peg.330	65058.363.peg.359	65058.420.peg.362	65058.421.peg.328	65058.428.peg.328	65058.426.peg.329	65058.313.peg.358	65058.314.peg.152	65058.315.peg.130	65058.316.peg.357	2320456.3.peg.363	65058.317.peg.357	65058.318.peg.316	65058.319.peg.317	65058.320.peg.334	65058.321.peg.59	65058.322.peg.308	65058.323.peg.314	65058.229.peg.340	2320431.9.peg.1611	2320431.16.peg.1614	2320431.10.peg.1614	2320431.17.peg.1614	2320431.13.peg.1614	2320431.14.peg.1611	2320431.12.peg.1615	2320431.15.peg.1614	65058.241.peg.410
	378	65058.435.peg.471	65058.432.peg.454	2320431.4.peg.358	2320431.3.peg.363	65058.401.peg.357	65058.405.peg.330	65058.406.peg.317	65058.410.peg.358	65058.411.peg.318	65058.370.peg.329	65058.373.peg.329	65058.374.peg.333	65058.375.peg.333	65058.376.peg.358	65058.437.peg.310	65058.385.peg.315	65058.419.peg.330	65058.361.peg.359	65058.362.peg.331	65058.363.peg.358	65058.420.peg.361	65058.421.peg.329	65058.428.peg.329	65058.426.peg.330	65058.313.peg.357	65058.314.peg.153	65058.315.peg.129	65058.316.peg.356	2320456.3.peg.362	65058.317.peg.356	65058.318.peg.315	65058.319.peg.316	65058.320.peg.335	65058.321.peg.58	65058.322.peg.307	65058.323.peg.313	65058.229.peg.341	2320431.9.peg.1610	2320431.16.peg.1613	2320431.10.peg.1613	2320431.17.peg.1613	2320431.13.peg.1613	2320431.14.peg.1610	2320431.12.peg.1614	2320431.15.peg.1613	65058.241.peg.411
	379	65058.435.peg.472	65058.432.peg.455	2320431.4.peg.357	2320431.3.peg.362	65058.401.peg.356	65058.405.peg.331	65058.406.peg.316	65058.410.peg.357	65058.411.peg.317	65058.370.peg.330	65058.373.peg.330	65058.374.peg.334	65058.375.peg.334	65058.376.peg.357	65058.437.peg.311	65058.385.peg.314	65058.419.peg.331	65058.361.peg.358	65058.362.peg.332	65058.363.peg.357	65058.420.peg.360	65058.421.peg.330	65058.428.peg.330	65058.426.peg.331	65058.313.peg.356	65058.314.peg.154	65058.315.peg.128	65058.316.peg.355	2320456.3.peg.361	65058.317.peg.355	65058.318.peg.314	65058.319.peg.315	65058.320.peg.336	65058.321.peg.57	65058.322.peg.306	65058.323.peg.312	65058.229.peg.342	2320431.9.peg.1609	2320431.16.peg.1612	2320431.10.peg.1612	2320431.17.peg.1612	2320431.13.peg.1612	2320431.14.peg.1609	2320431.12.peg.1613	2320431.15.peg.1612	65058.241.peg.412
	380	65058.435.peg.473	65058.432.peg.456	2320431.4.peg.356	2320431.3.peg.361	65058.401.peg.355	65058.405.peg.332	65058.406.peg.315	65058.410.peg.356	65058.411.peg.316	65058.370.peg.331	65058.373.peg.331	65058.374.peg.335	65058.375.peg.335	65058.376.peg.356	65058.437.peg.312	65058.385.peg.313	65058.419.peg.332	65058.361.peg.357	65058.362.peg.333	65058.363.peg.356	65058.420.peg.359	65058.421.peg.331	65058.428.peg.331	65058.426.peg.332	65058.313.peg.355	65058.314.peg.155	65058.315.peg.127	65058.316.peg.354	2320456.3.peg.360	65058.317.peg.354	65058.318.peg.313	65058.319.peg.314	65058.320.peg.337	65058.321.peg.56	65058.322.peg.305	65058.323.peg.311	65058.229.peg.343	2320431.9.peg.1608	2320431.16.peg.1611	2320431.10.peg.1611	2320431.17.peg.1611	2320431.13.peg.1611	2320431.14.peg.1608	2320431.12.peg.1612	2320431.15.peg.1611	65058.241.peg.413
	381	65058.435.peg.474	65058.432.peg.457	2320431.4.peg.355	2320431.3.peg.360	65058.401.peg.354	65058.405.peg.333	65058.406.peg.314	65058.410.peg.355	65058.411.peg.315	65058.370.peg.332	65058.373.peg.332	65058.374.peg.336	65058.375.peg.336	65058.376.peg.355	65058.437.peg.313	65058.385.peg.312	65058.419.peg.333	65058.361.peg.356	65058.362.peg.334	65058.363.peg.355	65058.420.peg.358	65058.421.peg.332	65058.428.peg.332	65058.426.peg.333	65058.313.peg.354	65058.314.peg.156	65058.315.peg.126	65058.316.peg.353	2320456.3.peg.359	65058.317.peg.353	65058.318.peg.312	65058.319.peg.313	65058.320.peg.338	65058.321.peg.55	65058.322.peg.304	65058.323.peg.310	65058.229.peg.344	2320431.9.peg.1607	2320431.16.peg.1610	2320431.10.peg.1610	2320431.17.peg.1610	2320431.13.peg.1610	2320431.14.peg.1607	2320431.12.peg.1611	2320431.15.peg.1610	65058.241.peg.414
	382	65058.435.peg.475	65058.432.peg.458	2320431.4.peg.354	2320431.3.peg.359	65058.401.peg.353	65058.405.peg.334	65058.406.peg.313	65058.410.peg.354	65058.411.peg.314	65058.370.peg.333	65058.373.peg.333	65058.374.peg.337	65058.375.peg.337	65058.376.peg.354	65058.437.peg.314	65058.385.peg.311	65058.419.peg.334	65058.361.peg.355	65058.362.peg.335	65058.363.peg.354	65058.420.peg.357	65058.421.peg.333	65058.428.peg.333	65058.426.peg.334	65058.313.peg.353	65058.314.peg.157	65058.315.peg.125	65058.316.peg.352	2320456.3.peg.358	65058.317.peg.352	65058.318.peg.311	65058.319.peg.312	65058.320.peg.339	65058.321.peg.54	65058.322.peg.303	65058.323.peg.309	65058.229.peg.345	2320431.9.peg.1606	2320431.16.peg.1609	2320431.10.peg.1609	2320431.17.peg.1609	2320431.13.peg.1609	2320431.14.peg.1606	2320431.12.peg.1610	2320431.15.peg.1609	65058.241.peg.415
	383	65058.435.peg.476	65058.432.peg.459	2320431.4.peg.353	2320431.3.peg.358	65058.401.peg.352	65058.405.peg.335	65058.406.peg.312	65058.410.peg.353	65058.411.peg.313	65058.370.peg.334	65058.373.peg.334	65058.374.peg.338	65058.375.peg.338	65058.376.peg.353	65058.437.peg.315	65058.385.peg.310	65058.419.peg.335	65058.361.peg.354	65058.362.peg.336	65058.363.peg.353	65058.420.peg.356	65058.421.peg.334	65058.428.peg.334	65058.426.peg.335	65058.313.peg.352	65058.314.peg.158	65058.315.peg.124	65058.316.peg.351	2320456.3.peg.357	65058.317.peg.351	65058.318.peg.310	65058.319.peg.311	65058.320.peg.340	65058.321.peg.53	65058.322.peg.302	65058.323.peg.308	65058.229.peg.346	2320431.9.peg.1605	2320431.16.peg.1608	2320431.10.peg.1608	2320431.17.peg.1608	2320431.13.peg.1608	2320431.14.peg.1605	2320431.12.peg.1609	2320431.15.peg.1608	65058.241.peg.416
	384	65058.435.peg.477	65058.432.peg.460	2320431.4.peg.352	2320431.3.peg.357	65058.401.peg.351	65058.405.peg.336	65058.406.peg.311	65058.410.peg.352	65058.411.peg.312	65058.370.peg.335	65058.373.peg.335	65058.374.peg.339	65058.375.peg.339	65058.376.peg.352	65058.437.peg.316	65058.385.peg.309	65058.419.peg.336	65058.361.peg.353	65058.362.peg.337	65058.363.peg.352	65058.420.peg.355	65058.421.peg.335	65058.428.peg.335	65058.426.peg.336	65058.313.peg.351	65058.314.peg.159	65058.315.peg.123	65058.316.peg.350	2320456.3.peg.356	65058.317.peg.350	65058.318.peg.309	65058.319.peg.310	65058.320.peg.341	65058.321.peg.52	65058.322.peg.301	65058.323.peg.307	65058.229.peg.347	2320431.9.peg.1604	2320431.16.peg.1607	2320431.10.peg.1607	2320431.17.peg.1607	2320431.13.peg.1607	2320431.14.peg.1604	2320431.12.peg.1608	2320431.15.peg.1607	65058.241.peg.417
	385	65058.435.peg.478	65058.432.peg.461	2320431.4.peg.351	2320431.3.peg.356	65058.401.peg.350	65058.405.peg.337	65058.406.peg.310	65058.410.peg.351	65058.411.peg.311	65058.370.peg.336	65058.373.peg.336	65058.374.peg.340	65058.375.peg.340	65058.376.peg.351	65058.437.peg.317	65058.385.peg.308	65058.419.peg.337	65058.361.peg.352	65058.362.peg.338	65058.363.peg.351	65058.420.peg.354	65058.421.peg.336	65058.428.peg.336	65058.426.peg.337	65058.313.peg.350	65058.314.peg.160	65058.315.peg.122	65058.316.peg.349	2320456.3.peg.355	65058.317.peg.349	65058.318.peg.308	65058.319.peg.309	65058.320.peg.342	65058.321.peg.51	65058.322.peg.300	65058.323.peg.306	65058.229.peg.348	2320431.9.peg.1603	2320431.16.peg.1606	2320431.10.peg.1606	2320431.17.peg.1606	2320431.13.peg.1606	2320431.14.peg.1603	2320431.12.peg.1607	2320431.15.peg.1606	65058.241.peg.418
	386	65058.435.peg.479	65058.432.peg.462	2320431.4.peg.350	2320431.3.peg.355	65058.401.peg.349	65058.405.peg.338	65058.406.peg.309	65058.410.peg.350	65058.411.peg.310	65058.370.peg.337	65058.373.peg.337	65058.374.peg.341	65058.375.peg.341	65058.376.peg.350	65058.437.peg.318	65058.385.peg.307	65058.419.peg.338	65058.361.peg.351	65058.362.peg.339	65058.363.peg.350	65058.420.peg.353	65058.421.peg.337	65058.428.peg.337	65058.426.peg.338	65058.313.peg.349	65058.314.peg.161	65058.315.peg.121	65058.316.peg.348	2320456.3.peg.354	65058.317.peg.348	65058.318.peg.307	65058.319.peg.308	65058.320.peg.343	65058.321.peg.50	65058.322.peg.299	65058.323.peg.305	65058.229.peg.349	2320431.9.peg.1602	2320431.16.peg.1605	2320431.10.peg.1605	2320431.17.peg.1605	2320431.13.peg.1605	2320431.14.peg.1602	2320431.12.peg.1606	2320431.15.peg.1605	65058.241.peg.419
	387	65058.435.peg.480	65058.432.peg.463	2320431.4.peg.349	2320431.3.peg.354	65058.401.peg.348	65058.405.peg.339	65058.406.peg.308	65058.410.peg.349	65058.411.peg.309	65058.370.peg.338	65058.373.peg.338	65058.374.peg.342	65058.375.peg.342	65058.376.peg.349	65058.437.peg.319	65058.385.peg.306	65058.419.peg.339	65058.361.peg.350	65058.362.peg.340	65058.363.peg.349	65058.420.peg.352	65058.421.peg.338	65058.428.peg.338	65058.426.peg.339	65058.313.peg.348	65058.314.peg.162	65058.315.peg.120	65058.316.peg.347	2320456.3.peg.353	65058.317.peg.347	65058.318.peg.306	65058.319.peg.307	65058.320.peg.344	65058.321.peg.49	65058.322.peg.298	65058.323.peg.304	65058.229.peg.350	2320431.9.peg.1601	2320431.16.peg.1604	2320431.10.peg.1604	2320431.17.peg.1604	2320431.13.peg.1604	2320431.14.peg.1601	2320431.12.peg.1605	2320431.15.peg.1604	65058.241.peg.420
	388	65058.435.peg.481	65058.432.peg.464	2320431.4.peg.348	2320431.3.peg.353	65058.401.peg.347	65058.405.peg.340	65058.406.peg.307	65058.410.peg.348	65058.411.peg.308	65058.370.peg.339	65058.373.peg.339	65058.374.peg.343	65058.375.peg.343	65058.376.peg.348	65058.437.peg.320	65058.385.peg.305	65058.419.peg.340	65058.361.peg.349	65058.362.peg.341	65058.363.peg.348	65058.420.peg.351	65058.421.peg.339	65058.428.peg.339	65058.426.peg.340	65058.313.peg.347	65058.314.peg.163	65058.315.peg.119	65058.316.peg.346	2320456.3.peg.352	65058.317.peg.346	65058.318.peg.305	65058.319.peg.306	65058.320.peg.345	65058.321.peg.48	65058.322.peg.297	65058.323.peg.303	65058.229.peg.351	2320431.9.peg.1600	2320431.16.peg.1603	2320431.10.peg.1603	2320431.17.peg.1603	2320431.13.peg.1603	2320431.14.peg.1600	2320431.12.peg.1604	2320431.15.peg.1603	65058.241.peg.421
	389	65058.435.peg.482	65058.432.peg.465	2320431.4.peg.347	2320431.3.peg.352	65058.401.peg.346	65058.405.peg.341	65058.406.peg.306	65058.410.peg.347	65058.411.peg.307	65058.370.peg.340	65058.373.peg.340	65058.374.peg.344	65058.375.peg.344	65058.376.peg.347	65058.437.peg.321	65058.385.peg.304	65058.419.peg.341	65058.361.peg.348	65058.362.peg.342	65058.363.peg.347	65058.420.peg.350	65058.421.peg.340	65058.428.peg.340	65058.426.peg.341	65058.313.peg.346	65058.314.peg.164	65058.315.peg.118	65058.316.peg.345	2320456.3.peg.351	65058.317.peg.345	65058.318.peg.304	65058.319.peg.305	65058.320.peg.346	65058.321.peg.47	65058.322.peg.296	65058.323.peg.302	65058.229.peg.352	2320431.9.peg.1599	2320431.16.peg.1602	2320431.10.peg.1602	2320431.17.peg.1602	2320431.13.peg.1602	2320431.14.peg.1599	2320431.12.peg.1603	2320431.15.peg.1602	65058.241.peg.422
	390	65058.435.peg.483	65058.432.peg.466	2320431.4.peg.346	2320431.3.peg.351	65058.401.peg.345	65058.405.peg.342	65058.406.peg.305	65058.410.peg.346	65058.411.peg.306	65058.370.peg.341	65058.373.peg.341	65058.374.peg.345	65058.375.peg.345	65058.376.peg.346	65058.437.peg.322	65058.385.peg.303	65058.419.peg.342	65058.361.peg.347	65058.362.peg.343	65058.363.peg.346	65058.420.peg.349	65058.421.peg.341	65058.428.peg.341	65058.426.peg.342	65058.313.peg.345	65058.314.peg.165	65058.315.peg.117	65058.316.peg.344	2320456.3.peg.350	65058.317.peg.344	65058.318.peg.303	65058.319.peg.304	65058.320.peg.347	65058.321.peg.46	65058.322.peg.295	65058.323.peg.301	65058.229.peg.353	2320431.9.peg.1598	2320431.16.peg.1601	2320431.10.peg.1601	2320431.17.peg.1601	2320431.13.peg.1601	2320431.14.peg.1598	2320431.12.peg.1602	2320431.15.peg.1601	65058.241.peg.423
	391	65058.435.peg.484	65058.432.peg.467	2320431.4.peg.345	2320431.3.peg.350	65058.401.peg.344	65058.405.peg.343	65058.406.peg.304	65058.410.peg.345	65058.411.peg.305	65058.370.peg.342	65058.373.peg.342	65058.374.peg.346	65058.375.peg.346	65058.376.peg.345	65058.437.peg.323	65058.385.peg.302	65058.419.peg.343	65058.361.peg.346	65058.362.peg.344	65058.363.peg.345	65058.420.peg.348	65058.421.peg.342	65058.428.peg.342	65058.426.peg.343	65058.313.peg.344	65058.314.peg.166	65058.315.peg.116	65058.316.peg.343	2320456.3.peg.349	65058.317.peg.343	65058.318.peg.302	65058.319.peg.303	65058.320.peg.348	65058.321.peg.45	65058.322.peg.294	65058.323.peg.300	65058.229.peg.354	2320431.9.peg.1597	2320431.16.peg.1600	2320431.10.peg.1600	2320431.17.peg.1600	2320431.13.peg.1600	2320431.14.peg.1597	2320431.12.peg.1601	2320431.15.peg.1600	65058.241.peg.424
	392	65058.435.peg.485	65058.432.peg.468	2320431.4.peg.344	2320431.3.peg.349	65058.401.peg.343	65058.405.peg.344	65058.406.peg.303	65058.410.peg.344	65058.411.peg.304	65058.370.peg.343	65058.373.peg.343	65058.374.peg.347	65058.375.peg.347	65058.376.peg.344	65058.437.peg.324	65058.385.peg.301	65058.419.peg.344	65058.361.peg.345	65058.362.peg.345	65058.363.peg.344	65058.420.peg.347	65058.421.peg.343	65058.428.peg.343	65058.426.peg.344	65058.313.peg.343	65058.314.peg.167	65058.315.peg.115	65058.316.peg.342	2320456.3.peg.348	65058.317.peg.342	65058.318.peg.301	65058.319.peg.302	65058.320.peg.349	65058.321.peg.44	65058.322.peg.293	65058.323.peg.299	65058.229.peg.355	2320431.9.peg.1596	2320431.16.peg.1599	2320431.10.peg.1599	2320431.17.peg.1599	2320431.13.peg.1599	2320431.14.peg.1596	2320431.12.peg.1600	2320431.15.peg.1599	65058.241.peg.425
	393	65058.435.peg.486	65058.432.peg.469	2320431.4.peg.343	2320431.3.peg.348	65058.401.peg.342	65058.405.peg.345	65058.406.peg.302	65058.410.peg.343	65058.411.peg.303	65058.370.peg.344	65058.373.peg.344	65058.374.peg.348	65058.375.peg.348	65058.376.peg.343	65058.437.peg.325	65058.385.peg.300	65058.419.peg.345	65058.361.peg.344	65058.362.peg.346	65058.363.peg.343	65058.420.peg.346	65058.421.peg.344	65058.428.peg.344	65058.426.peg.345	65058.313.peg.342	65058.314.peg.168	65058.315.peg.114	65058.316.peg.341	2320456.3.peg.347	65058.317.peg.341	65058.318.peg.300	65058.319.peg.301	65058.320.peg.350	65058.321.peg.43	65058.322.peg.292	65058.323.peg.298	65058.229.peg.356	2320431.9.peg.1595	2320431.16.peg.1598	2320431.10.peg.1598	2320431.17.peg.1598	2320431.13.peg.1598	2320431.14.peg.1595	2320431.12.peg.1599	2320431.15.peg.1598	65058.241.peg.426
	394	65058.435.peg.487	65058.432.peg.470	2320431.4.peg.342	2320431.3.peg.347	65058.401.peg.341	65058.405.peg.346	65058.406.peg.301	65058.410.peg.342	65058.411.peg.302	65058.370.peg.345	65058.373.peg.345	65058.374.peg.349	65058.375.peg.349	65058.376.peg.342	65058.437.peg.326	65058.385.peg.299	65058.419.peg.346	65058.361.peg.343	65058.362.peg.347	65058.363.peg.342	65058.420.peg.345	65058.421.peg.345	65058.428.peg.345	65058.426.peg.346	65058.313.peg.341	65058.314.peg.169	65058.315.peg.113	65058.316.peg.340	2320456.3.peg.346	65058.317.peg.340	65058.318.peg.299	65058.319.peg.300	65058.320.peg.351	65058.321.peg.42	65058.322.peg.291	65058.323.peg.297	65058.229.peg.357	2320431.9.peg.1594	2320431.16.peg.1597	2320431.10.peg.1597	2320431.17.peg.1597	2320431.13.peg.1597	2320431.14.peg.1594	2320431.12.peg.1598	2320431.15.peg.1597	65058.241.peg.427
	395	65058.435.peg.488	65058.432.peg.471	2320431.4.peg.341	2320431.3.peg.346	65058.401.peg.340	65058.405.peg.347	65058.406.peg.300	65058.410.peg.341	65058.411.peg.301	65058.370.peg.346	65058.373.peg.346	65058.374.peg.350	65058.375.peg.350	65058.376.peg.341	65058.437.peg.327	65058.385.peg.298	65058.419.peg.347	65058.361.peg.342	65058.362.peg.348	65058.363.peg.341	65058.420.peg.344	65058.421.peg.346	65058.428.peg.346	65058.426.peg.347	65058.313.peg.340	65058.314.peg.170	65058.315.peg.112	65058.316.peg.339	2320456.3.peg.345	65058.317.peg.339	65058.318.peg.298	65058.319.peg.299	65058.320.peg.352	65058.321.peg.41	65058.322.peg.290	65058.323.peg.296	65058.229.peg.358	2320431.9.peg.1593	2320431.16.peg.1596	2320431.10.peg.1596	2320431.17.peg.1596	2320431.13.peg.1596	2320431.14.peg.1593	2320431.12.peg.1597	2320431.15.peg.1596	65058.241.peg.428
	396	65058.435.peg.489	65058.432.peg.472	2320431.4.peg.340	2320431.3.peg.345	65058.401.peg.339	65058.405.peg.348	65058.406.peg.299	65058.410.peg.340	65058.411.peg.300	65058.370.peg.347	65058.373.peg.347	65058.374.peg.351	65058.375.peg.351	65058.376.peg.340	65058.437.peg.329	65058.385.peg.297	65058.419.peg.348	65058.361.peg.341	65058.362.peg.349	65058.363.peg.340	65058.420.peg.343	65058.421.peg.347	65058.428.peg.347	65058.426.peg.348	65058.313.peg.339	65058.314.peg.171	65058.315.peg.111	65058.316.peg.338	2320456.3.peg.344	65058.317.peg.338	65058.318.peg.297	65058.319.peg.298	65058.320.peg.353	65058.321.peg.40	65058.322.peg.289	65058.323.peg.295	65058.229.peg.359	2320431.9.peg.1592	2320431.16.peg.1595	2320431.10.peg.1595	2320431.17.peg.1595	2320431.13.peg.1595	2320431.14.peg.1592	2320431.12.peg.1596	2320431.15.peg.1595	65058.241.peg.429
	397	65058.435.peg.490	65058.432.peg.473	2320431.4.peg.339	2320431.3.peg.344	65058.401.peg.338	65058.405.peg.349	65058.406.peg.298	65058.410.peg.339	65058.411.peg.299	65058.370.peg.348	65058.373.peg.348	65058.374.peg.352	65058.375.peg.352	65058.376.peg.338	65058.437.peg.330	65058.385.peg.296	65058.419.peg.349	65058.361.peg.339	65058.362.peg.350	65058.363.peg.339	65058.420.peg.342	65058.421.peg.348	65058.428.peg.349	65058.426.peg.350	65058.313.peg.338	65058.314.peg.172	65058.315.peg.110	65058.316.peg.336	2320456.3.peg.342	65058.317.peg.337	65058.318.peg.296	65058.319.peg.297	65058.320.peg.354	65058.321.peg.38	65058.322.peg.288	65058.323.peg.294	65058.229.peg.360	2320431.9.peg.1591	2320431.16.peg.1594	2320431.10.peg.1593	2320431.17.peg.1594	2320431.13.peg.1594	2320431.14.peg.1591	2320431.12.peg.1595	2320431.15.peg.1594	65058.241.peg.430
	398	65058.435.peg.491	65058.432.peg.474	2320431.4.peg.338	2320431.3.peg.343	65058.401.peg.337	65058.405.peg.350	65058.406.peg.297	65058.410.peg.338	65058.411.peg.298	65058.370.peg.349	65058.373.peg.349	65058.374.peg.353	65058.375.peg.353	65058.376.peg.337	65058.437.peg.331	65058.385.peg.295	65058.419.peg.350	65058.361.peg.338	65058.362.peg.351	65058.363.peg.338	65058.420.peg.341	65058.421.peg.349	65058.428.peg.350	65058.426.peg.351	65058.313.peg.337	65058.314.peg.173	65058.315.peg.109	65058.316.peg.335	2320456.3.peg.341	65058.317.peg.336	65058.318.peg.295	65058.319.peg.296	65058.320.peg.355	65058.321.peg.37	65058.322.peg.287	65058.323.peg.293	65058.229.peg.361	2320431.9.peg.1590	2320431.16.peg.1593	2320431.10.peg.1592	2320431.17.peg.1593	2320431.13.peg.1593	2320431.14.peg.1590	2320431.12.peg.1594	2320431.15.peg.1593	65058.241.peg.431
	399	65058.435.peg.492	65058.432.peg.475	2320431.4.peg.337	2320431.3.peg.342	65058.401.peg.336	65058.405.peg.351	65058.406.peg.296	65058.410.peg.337	65058.411.peg.297	65058.370.peg.350	65058.373.peg.350	65058.374.peg.354	65058.375.peg.354	65058.376.peg.336	65058.437.peg.332	65058.385.peg.294	65058.419.peg.351	65058.361.peg.337	65058.362.peg.352	65058.363.peg.337	65058.420.peg.340	65058.421.peg.350	65058.428.peg.351	65058.426.peg.352	65058.313.peg.336	65058.314.peg.174	65058.315.peg.108	65058.316.peg.334	2320456.3.peg.340	65058.317.peg.335	65058.318.peg.294	65058.319.peg.295	65058.320.peg.356	65058.321.peg.36	65058.322.peg.286	65058.323.peg.292	65058.229.peg.362	2320431.9.peg.1589	2320431.16.peg.1592	2320431.10.peg.1591	2320431.17.peg.1592	2320431.13.peg.1592	2320431.14.peg.1589	2320431.12.peg.1593	2320431.15.peg.1592	65058.241.peg.432
	400	65058.435.peg.493	65058.432.peg.476	2320431.4.peg.336	2320431.3.peg.341	65058.401.peg.335	65058.405.peg.352	65058.406.peg.295	65058.410.peg.336	65058.411.peg.296	65058.370.peg.351	65058.373.peg.351	65058.374.peg.355	65058.375.peg.355	65058.376.peg.335	65058.437.peg.333	65058.385.peg.293	65058.419.peg.352	65058.361.peg.336	65058.362.peg.353	65058.363.peg.336	65058.420.peg.339	65058.421.peg.351	65058.428.peg.352	65058.426.peg.353	65058.313.peg.335	65058.314.peg.175	65058.315.peg.107	65058.316.peg.333	2320456.3.peg.339	65058.317.peg.334	65058.318.peg.293	65058.319.peg.294	65058.320.peg.357	65058.321.peg.35	65058.322.peg.285	65058.323.peg.291	65058.229.peg.363	2320431.9.peg.1588	2320431.16.peg.1591	2320431.10.peg.1590	2320431.17.peg.1591	2320431.13.peg.1591	2320431.14.peg.1588	2320431.12.peg.1592	2320431.15.peg.1591	65058.241.peg.433
	401	65058.435.peg.494	65058.432.peg.477	2320431.4.peg.335	2320431.3.peg.340	65058.401.peg.334	65058.405.peg.353	65058.406.peg.294	65058.410.peg.335	65058.411.peg.295	65058.370.peg.352	65058.373.peg.352	65058.374.peg.356	65058.375.peg.356	65058.376.peg.334	65058.437.peg.334	65058.385.peg.292	65058.419.peg.353	65058.361.peg.335	65058.362.peg.354	65058.363.peg.335	65058.420.peg.338	65058.421.peg.352	65058.428.peg.353	65058.426.peg.354	65058.313.peg.334	65058.314.peg.176	65058.315.peg.106	65058.316.peg.332	2320456.3.peg.338	65058.317.peg.333	65058.318.peg.292	65058.319.peg.293	65058.320.peg.358	65058.321.peg.34	65058.322.peg.284	65058.323.peg.290	65058.229.peg.364	2320431.9.peg.1587	2320431.16.peg.1590	2320431.10.peg.1589	2320431.17.peg.1590	2320431.13.peg.1590	2320431.14.peg.1587	2320431.12.peg.1591	2320431.15.peg.1590	65058.241.peg.434
	402	65058.435.peg.495	65058.432.peg.478	2320431.4.peg.334	2320431.3.peg.339	65058.401.peg.333	65058.405.peg.354	65058.406.peg.293	65058.410.peg.334	65058.411.peg.294	65058.370.peg.353	65058.373.peg.353	65058.374.peg.357	65058.375.peg.357	65058.376.peg.333	65058.437.peg.335	65058.385.peg.291	65058.419.peg.354	65058.361.peg.334	65058.362.peg.355	65058.363.peg.334	65058.420.peg.337	65058.421.peg.353	65058.428.peg.354	65058.426.peg.355	65058.313.peg.333	65058.314.peg.177	65058.315.peg.105	65058.316.peg.331	2320456.3.peg.337	65058.317.peg.332	65058.318.peg.291	65058.319.peg.292	65058.320.peg.359	65058.321.peg.33	65058.322.peg.283	65058.323.peg.289	65058.229.peg.365	2320431.9.peg.1586	2320431.16.peg.1589	2320431.10.peg.1588	2320431.17.peg.1589	2320431.13.peg.1589	2320431.14.peg.1586	2320431.12.peg.1590	2320431.15.peg.1589	65058.241.peg.435
	403	65058.435.peg.496	65058.432.peg.479	2320431.4.peg.333	2320431.3.peg.338	65058.401.peg.332	65058.405.peg.355	65058.406.peg.292	65058.410.peg.333	65058.411.peg.293	65058.370.peg.354	65058.373.peg.354	65058.374.peg.358	65058.375.peg.358	65058.376.peg.332	65058.437.peg.336	65058.385.peg.290	65058.419.peg.355	65058.361.peg.333	65058.362.peg.356	65058.363.peg.333	65058.420.peg.336	65058.421.peg.354	65058.428.peg.355	65058.426.peg.356	65058.313.peg.332	65058.314.peg.178	65058.315.peg.104	65058.316.peg.330	2320456.3.peg.336	65058.317.peg.331	65058.318.peg.290	65058.319.peg.291	65058.320.peg.360	65058.321.peg.32	65058.322.peg.282	65058.323.peg.288	65058.229.peg.366	2320431.9.peg.1585	2320431.16.peg.1588	2320431.10.peg.1587	2320431.17.peg.1588	2320431.13.peg.1588	2320431.14.peg.1585	2320431.12.peg.1589	2320431.15.peg.1588	65058.241.peg.436
	404	65058.435.peg.497	65058.432.peg.480	2320431.4.peg.332	2320431.3.peg.337	65058.401.peg.331	65058.405.peg.356	65058.406.peg.291	65058.410.peg.332	65058.411.peg.292	65058.370.peg.355	65058.373.peg.355	65058.374.peg.359	65058.375.peg.359	65058.376.peg.331	65058.437.peg.337	65058.385.peg.289	65058.419.peg.356	65058.361.peg.332	65058.362.peg.357	65058.363.peg.332	65058.420.peg.335	65058.421.peg.355	65058.428.peg.356	65058.426.peg.357	65058.313.peg.331	65058.314.peg.179	65058.315.peg.103	65058.316.peg.329	2320456.3.peg.335	65058.317.peg.330	65058.318.peg.289	65058.319.peg.290	65058.320.peg.361	65058.321.peg.31	65058.322.peg.281	65058.323.peg.287	65058.229.peg.367	2320431.9.peg.1584	2320431.16.peg.1587	2320431.10.peg.1586	2320431.17.peg.1587	2320431.13.peg.1587	2320431.14.peg.1584	2320431.12.peg.1588	2320431.15.peg.1587	65058.241.peg.437
	405	65058.435.peg.498	65058.432.peg.481	2320431.4.peg.331	2320431.3.peg.336	65058.401.peg.330	65058.405.peg.357	65058.406.peg.290	65058.410.peg.331	65058.411.peg.291	65058.370.peg.356	65058.373.peg.356	65058.374.peg.360	65058.375.peg.360	65058.376.peg.330	65058.437.peg.338	65058.385.peg.288	65058.419.peg.357	65058.361.peg.331	65058.362.peg.358	65058.363.peg.331	65058.420.peg.334	65058.421.peg.356	65058.428.peg.357	65058.426.peg.358	65058.313.peg.330	65058.314.peg.180	65058.315.peg.102	65058.316.peg.328	2320456.3.peg.334	65058.317.peg.329	65058.318.peg.288	65058.319.peg.289	65058.320.peg.362	65058.321.peg.30	65058.322.peg.280	65058.323.peg.286	65058.229.peg.368	2320431.9.peg.1583	2320431.16.peg.1586	2320431.10.peg.1585	2320431.17.peg.1586	2320431.13.peg.1586	2320431.14.peg.1583	2320431.12.peg.1587	2320431.15.peg.1586	65058.241.peg.438
	406	65058.435.peg.500	65058.432.peg.483	2320431.4.peg.329	2320431.3.peg.334	65058.401.peg.329	65058.405.peg.358	65058.406.peg.289	65058.410.peg.330	65058.411.peg.290	65058.370.peg.357	65058.373.peg.357	65058.374.peg.361	65058.375.peg.361	65058.376.peg.329	65058.437.peg.339	65058.385.peg.287	65058.419.peg.358	65058.361.peg.330	65058.362.peg.359	65058.363.peg.330	65058.420.peg.333	65058.421.peg.357	65058.428.peg.358	65058.426.peg.359	65058.313.peg.329	65058.314.peg.181	65058.315.peg.101	65058.316.peg.327	2320456.3.peg.332	65058.317.peg.328	65058.318.peg.287	65058.319.peg.288	65058.320.peg.363	65058.321.peg.29	65058.322.peg.279	65058.323.peg.285	65058.229.peg.370	2320431.9.peg.1582	2320431.16.peg.1585	2320431.10.peg.1584	2320431.17.peg.1585	2320431.13.peg.1585	2320431.14.peg.1582	2320431.12.peg.1586	2320431.15.peg.1585	65058.241.peg.440
	407	65058.435.peg.501	65058.432.peg.484	2320431.4.peg.328	2320431.3.peg.333	65058.401.peg.328	65058.405.peg.359	65058.406.peg.288	65058.410.peg.329	65058.411.peg.289	65058.370.peg.358	65058.373.peg.358	65058.374.peg.362	65058.375.peg.362	65058.376.peg.328	65058.437.peg.340	65058.385.peg.286	65058.419.peg.359	65058.361.peg.329	65058.362.peg.360	65058.363.peg.329	65058.420.peg.332	65058.421.peg.358	65058.428.peg.359	65058.426.peg.360	65058.313.peg.328	65058.314.peg.182	65058.315.peg.100	65058.316.peg.326	2320456.3.peg.331	65058.317.peg.327	65058.318.peg.286	65058.319.peg.287	65058.320.peg.364	65058.321.peg.28	65058.322.peg.278	65058.323.peg.284	65058.229.peg.371	2320431.9.peg.1581	2320431.16.peg.1584	2320431.10.peg.1583	2320431.17.peg.1584	2320431.13.peg.1584	2320431.14.peg.1581	2320431.12.peg.1585	2320431.15.peg.1584	65058.241.peg.441
	408	65058.435.peg.502	65058.432.peg.485	2320431.4.peg.327	2320431.3.peg.332	65058.401.peg.327	65058.405.peg.360	65058.406.peg.287	65058.410.peg.328	65058.411.peg.288	65058.370.peg.359	65058.373.peg.359	65058.374.peg.363	65058.375.peg.363	65058.376.peg.327	65058.437.peg.341	65058.385.peg.285	65058.419.peg.360	65058.361.peg.328	65058.362.peg.361	65058.363.peg.328	65058.420.peg.331	65058.421.peg.359	65058.428.peg.360	65058.426.peg.361	65058.313.peg.327	65058.314.peg.183	65058.315.peg.99	65058.316.peg.325	2320456.3.peg.330	65058.317.peg.326	65058.318.peg.285	65058.319.peg.286	65058.320.peg.365	65058.321.peg.27	65058.322.peg.277	65058.323.peg.283	65058.229.peg.372	2320431.9.peg.1580	2320431.16.peg.1583	2320431.10.peg.1582	2320431.17.peg.1583	2320431.13.peg.1583	2320431.14.peg.1580	2320431.12.peg.1584	2320431.15.peg.1583	65058.241.peg.442
	409	65058.435.peg.503	65058.432.peg.486	2320431.4.peg.326	2320431.3.peg.331	65058.401.peg.326	65058.405.peg.361	65058.406.peg.286	65058.410.peg.327	65058.411.peg.287	65058.370.peg.360	65058.373.peg.360	65058.374.peg.364	65058.375.peg.364	65058.376.peg.326	65058.437.peg.342	65058.385.peg.284	65058.419.peg.361	65058.361.peg.327	65058.362.peg.362	65058.363.peg.327	65058.420.peg.329	65058.421.peg.360	65058.428.peg.361	65058.426.peg.362	65058.313.peg.326	65058.314.peg.184	65058.315.peg.98	65058.316.peg.324	2320456.3.peg.329	65058.317.peg.325	65058.318.peg.284	65058.319.peg.285	65058.320.peg.366	65058.321.peg.26	65058.322.peg.276	65058.323.peg.282	65058.229.peg.373	2320431.9.peg.1579	2320431.16.peg.1582	2320431.10.peg.1581	2320431.17.peg.1582	2320431.13.peg.1582	2320431.14.peg.1579	2320431.12.peg.1583	2320431.15.peg.1582	65058.241.peg.443
	410	65058.435.peg.505	65058.432.peg.488	2320431.4.peg.324	2320431.3.peg.329	65058.401.peg.323	65058.405.peg.364	65058.406.peg.283	65058.410.peg.324	65058.411.peg.284	65058.370.peg.363	65058.373.peg.363	65058.374.peg.367	65058.375.peg.367	65058.376.peg.323	65058.437.peg.345	65058.385.peg.281	65058.419.peg.364	65058.361.peg.324	65058.362.peg.365	65058.363.peg.324	65058.420.peg.326	65058.421.peg.362	65058.428.peg.364	65058.426.peg.365	65058.313.peg.323	65058.314.peg.187	65058.315.peg.96	65058.316.peg.321	2320456.3.peg.327	65058.317.peg.322	65058.318.peg.281	65058.319.peg.282	65058.320.peg.369	65058.321.peg.23	65058.322.peg.273	65058.323.peg.279	65058.229.peg.375	2320431.9.peg.1576	2320431.16.peg.1579	2320431.10.peg.1578	2320431.17.peg.1579	2320431.13.peg.1579	2320431.14.peg.1576	2320431.12.peg.1580	2320431.15.peg.1579	65058.241.peg.445
	411	65058.435.peg.506	65058.432.peg.489	2320431.4.peg.323	2320431.3.peg.327	65058.401.peg.322	65058.405.peg.365	65058.406.peg.282	65058.410.peg.323	65058.411.peg.283	65058.370.peg.364	65058.373.peg.364	65058.374.peg.368	65058.375.peg.368	65058.376.peg.322	65058.437.peg.346	65058.385.peg.280	65058.419.peg.365	65058.361.peg.323	65058.362.peg.366	65058.363.peg.323	65058.420.peg.324	65058.421.peg.363	65058.428.peg.365	65058.426.peg.366	65058.313.peg.322	65058.314.peg.188	65058.315.peg.95	65058.316.peg.320	2320456.3.peg.326	65058.317.peg.321	65058.318.peg.280	65058.319.peg.281	65058.320.peg.370	65058.321.peg.22	65058.322.peg.272	65058.323.peg.278	65058.229.peg.376	2320431.9.peg.1575	2320431.16.peg.1578	2320431.10.peg.1577	2320431.17.peg.1578	2320431.13.peg.1578	2320431.14.peg.1575	2320431.12.peg.1579	2320431.15.peg.1578	65058.241.peg.446
	412	65058.435.peg.509	65058.432.peg.490	2320431.4.peg.320	2320431.3.peg.324	65058.401.peg.319	65058.405.peg.368	65058.406.peg.279	65058.410.peg.320	65058.411.peg.280	65058.370.peg.367	65058.373.peg.367	65058.374.peg.371	65058.375.peg.371	65058.376.peg.319	65058.437.peg.349	65058.385.peg.277	65058.419.peg.368	65058.361.peg.320	65058.362.peg.369	65058.363.peg.320	65058.420.peg.321	65058.421.peg.366	65058.428.peg.368	65058.426.peg.369	65058.313.peg.319	65058.314.peg.191	65058.315.peg.92	65058.316.peg.317	2320456.3.peg.323	65058.317.peg.318	65058.318.peg.277	65058.319.peg.278	65058.320.peg.373	65058.321.peg.19	65058.322.peg.269	65058.323.peg.275	65058.229.peg.379	2320431.9.peg.1574	2320431.16.peg.1577	2320431.10.peg.1576	2320431.17.peg.1577	2320431.13.peg.1577	2320431.14.peg.1574	2320431.12.peg.1578	2320431.15.peg.1577	65058.241.peg.449
	413	65058.435.peg.510	65058.432.peg.491	2320431.4.peg.319	2320431.3.peg.323	65058.401.peg.318	65058.405.peg.369	65058.406.peg.278	65058.410.peg.319	65058.411.peg.279	65058.370.peg.368	65058.373.peg.368	65058.374.peg.372	65058.375.peg.372	65058.376.peg.318	65058.437.peg.350	65058.385.peg.276	65058.419.peg.369	65058.361.peg.319	65058.362.peg.370	65058.363.peg.319	65058.420.peg.320	65058.421.peg.367	65058.428.peg.369	65058.426.peg.370	65058.313.peg.318	65058.314.peg.192	65058.315.peg.91	65058.316.peg.316	2320456.3.peg.322	65058.317.peg.317	65058.318.peg.276	65058.319.peg.277	65058.320.peg.374	65058.321.peg.18	65058.322.peg.268	65058.323.peg.274	65058.229.peg.380	2320431.9.peg.1573	2320431.16.peg.1576	2320431.10.peg.1575	2320431.17.peg.1576	2320431.13.peg.1576	2320431.14.peg.1573	2320431.12.peg.1577	2320431.15.peg.1576	65058.241.peg.450
	414	65058.435.peg.511	65058.432.peg.492	2320431.4.peg.318	2320431.3.peg.322	65058.401.peg.317	65058.405.peg.370	65058.406.peg.277	65058.410.peg.318	65058.411.peg.278	65058.370.peg.369	65058.373.peg.369	65058.374.peg.373	65058.375.peg.373	65058.376.peg.317	65058.437.peg.351	65058.385.peg.275	65058.419.peg.370	65058.361.peg.318	65058.362.peg.371	65058.363.peg.318	65058.420.peg.319	65058.421.peg.368	65058.428.peg.370	65058.426.peg.371	65058.313.peg.317	65058.314.peg.193	65058.315.peg.90	65058.316.peg.315	2320456.3.peg.321	65058.317.peg.316	65058.318.peg.275	65058.319.peg.276	65058.320.peg.375	65058.321.peg.17	65058.322.peg.267	65058.323.peg.273	65058.229.peg.381	2320431.9.peg.1572	2320431.16.peg.1575	2320431.10.peg.1574	2320431.17.peg.1575	2320431.13.peg.1575	2320431.14.peg.1572	2320431.12.peg.1576	2320431.15.peg.1575	65058.241.peg.451
	415	65058.435.peg.512	65058.432.peg.493	2320431.4.peg.317	2320431.3.peg.321	65058.401.peg.316	65058.405.peg.371	65058.406.peg.276	65058.410.peg.317	65058.411.peg.277	65058.370.peg.370	65058.373.peg.370	65058.374.peg.374	65058.375.peg.374	65058.376.peg.316	65058.437.peg.352	65058.385.peg.274	65058.419.peg.371	65058.361.peg.317	65058.362.peg.372	65058.363.peg.317	65058.420.peg.318	65058.421.peg.369	65058.428.peg.371	65058.426.peg.372	65058.313.peg.316	65058.314.peg.194	65058.315.peg.89	65058.316.peg.314	2320456.3.peg.320	65058.317.peg.315	65058.318.peg.274	65058.319.peg.275	65058.320.peg.376	65058.321.peg.16	65058.322.peg.266	65058.323.peg.272	65058.229.peg.382	2320431.9.peg.1571	2320431.16.peg.1574	2320431.10.peg.1573	2320431.17.peg.1574	2320431.13.peg.1574	2320431.14.peg.1571	2320431.12.peg.1575	2320431.15.peg.1574	65058.241.peg.452
	416	65058.435.peg.513	65058.432.peg.494	2320431.4.peg.316	2320431.3.peg.320	65058.401.peg.315	65058.405.peg.372	65058.406.peg.275	65058.410.peg.316	65058.411.peg.276	65058.370.peg.371	65058.373.peg.371	65058.374.peg.375	65058.375.peg.375	65058.376.peg.315	65058.437.peg.353	65058.385.peg.273	65058.419.peg.372	65058.361.peg.316	65058.362.peg.373	65058.363.peg.316	65058.420.peg.317	65058.421.peg.370	65058.428.peg.372	65058.426.peg.373	65058.313.peg.315	65058.314.peg.195	65058.315.peg.88	65058.316.peg.313	2320456.3.peg.319	65058.317.peg.314	65058.318.peg.273	65058.319.peg.274	65058.320.peg.377	65058.321.peg.15	65058.322.peg.265	65058.323.peg.271	65058.229.peg.383	2320431.9.peg.1570	2320431.16.peg.1573	2320431.10.peg.1572	2320431.17.peg.1573	2320431.13.peg.1573	2320431.14.peg.1570	2320431.12.peg.1574	2320431.15.peg.1573	65058.241.peg.453
	417	65058.435.peg.514	65058.432.peg.495	2320431.4.peg.315	2320431.3.peg.319	65058.401.peg.314	65058.405.peg.373	65058.406.peg.274	65058.410.peg.315	65058.411.peg.275	65058.370.peg.372	65058.373.peg.372	65058.374.peg.376	65058.375.peg.376	65058.376.peg.314	65058.437.peg.354	65058.385.peg.272	65058.419.peg.373	65058.361.peg.315	65058.362.peg.374	65058.363.peg.315	65058.420.peg.316	65058.421.peg.371	65058.428.peg.373	65058.426.peg.374	65058.313.peg.314	65058.314.peg.196	65058.315.peg.87	65058.316.peg.312	2320456.3.peg.318	65058.317.peg.313	65058.318.peg.272	65058.319.peg.273	65058.320.peg.378	65058.321.peg.14	65058.322.peg.264	65058.323.peg.270	65058.229.peg.384	2320431.9.peg.1569	2320431.16.peg.1572	2320431.10.peg.1571	2320431.17.peg.1572	2320431.13.peg.1572	2320431.14.peg.1569	2320431.12.peg.1573	2320431.15.peg.1572	65058.241.peg.454
	418	65058.435.peg.515	65058.432.peg.496	2320431.4.peg.314	2320431.3.peg.318	65058.401.peg.313	65058.405.peg.374	65058.406.peg.273	65058.410.peg.314	65058.411.peg.274	65058.370.peg.373	65058.373.peg.373	65058.374.peg.377	65058.375.peg.377	65058.376.peg.313	65058.437.peg.355	65058.385.peg.271	65058.419.peg.374	65058.361.peg.314	65058.362.peg.375	65058.363.peg.314	65058.420.peg.315	65058.421.peg.372	65058.428.peg.374	65058.426.peg.375	65058.313.peg.313	65058.314.peg.197	65058.315.peg.86	65058.316.peg.311	2320456.3.peg.317	65058.317.peg.312	65058.318.peg.271	65058.319.peg.272	65058.320.peg.379	65058.321.peg.13	65058.322.peg.263	65058.323.peg.269	65058.229.peg.385	2320431.9.peg.1568	2320431.16.peg.1571	2320431.10.peg.1570	2320431.17.peg.1571	2320431.13.peg.1571	2320431.14.peg.1568	2320431.12.peg.1572	2320431.15.peg.1571	65058.241.peg.455
	419	65058.435.peg.516	65058.432.peg.497	2320431.4.peg.313	2320431.3.peg.317	65058.401.peg.312	65058.405.peg.375	65058.406.peg.272	65058.410.peg.313	65058.411.peg.273	65058.370.peg.374	65058.373.peg.374	65058.374.peg.378	65058.375.peg.378	65058.376.peg.312	65058.437.peg.356	65058.385.peg.270	65058.419.peg.375	65058.361.peg.313	65058.362.peg.376	65058.363.peg.313	65058.420.peg.314	65058.421.peg.373	65058.428.peg.375	65058.426.peg.376	65058.313.peg.312	65058.314.peg.198	65058.315.peg.85	65058.316.peg.310	2320456.3.peg.316	65058.317.peg.311	65058.318.peg.270	65058.319.peg.271	65058.320.peg.380	65058.321.peg.12	65058.322.peg.262	65058.323.peg.268	65058.229.peg.386	2320431.9.peg.1567	2320431.16.peg.1570	2320431.10.peg.1569	2320431.17.peg.1570	2320431.13.peg.1570	2320431.14.peg.1567	2320431.12.peg.1571	2320431.15.peg.1570	65058.241.peg.456
	420	65058.435.peg.517	65058.432.peg.498	2320431.4.peg.312	2320431.3.peg.316	65058.401.peg.311	65058.405.peg.376	65058.406.peg.271	65058.410.peg.312	65058.411.peg.272	65058.370.peg.375	65058.373.peg.375	65058.374.peg.379	65058.375.peg.379	65058.376.peg.311	65058.437.peg.357	65058.385.peg.269	65058.419.peg.376	65058.361.peg.312	65058.362.peg.377	65058.363.peg.312	65058.420.peg.313	65058.421.peg.374	65058.428.peg.376	65058.426.peg.377	65058.313.peg.311	65058.314.peg.199	65058.315.peg.84	65058.316.peg.309	2320456.3.peg.315	65058.317.peg.310	65058.318.peg.269	65058.319.peg.270	65058.320.peg.381	65058.321.peg.11	65058.322.peg.261	65058.323.peg.267	65058.229.peg.387	2320431.9.peg.1566	2320431.16.peg.1569	2320431.10.peg.1568	2320431.17.peg.1569	2320431.13.peg.1569	2320431.14.peg.1566	2320431.12.peg.1570	2320431.15.peg.1569	65058.241.peg.457
	421	65058.435.peg.518	65058.432.peg.499	2320431.4.peg.311	2320431.3.peg.315	65058.401.peg.310	65058.405.peg.377	65058.406.peg.270	65058.410.peg.311	65058.411.peg.271	65058.370.peg.376	65058.373.peg.376	65058.374.peg.380	65058.375.peg.380	65058.376.peg.310	65058.437.peg.358	65058.385.peg.268	65058.419.peg.377	65058.361.peg.311	65058.362.peg.378	65058.363.peg.311	65058.420.peg.312	65058.421.peg.375	65058.428.peg.377	65058.426.peg.378	65058.313.peg.310	65058.314.peg.200	65058.315.peg.83	65058.316.peg.308	2320456.3.peg.314	65058.317.peg.309	65058.318.peg.268	65058.319.peg.269	65058.320.peg.382	65058.321.peg.10	65058.322.peg.260	65058.323.peg.266	65058.229.peg.388	2320431.9.peg.1565	2320431.16.peg.1568	2320431.10.peg.1567	2320431.17.peg.1568	2320431.13.peg.1568	2320431.14.peg.1565	2320431.12.peg.1569	2320431.15.peg.1568	65058.241.peg.458
	422	65058.435.peg.519	65058.432.peg.500	2320431.4.peg.310	2320431.3.peg.314	65058.401.peg.309	65058.405.peg.378	65058.406.peg.269	65058.410.peg.310	65058.411.peg.270	65058.370.peg.377	65058.373.peg.377	65058.374.peg.381	65058.375.peg.381	65058.376.peg.309	65058.437.peg.359	65058.385.peg.267	65058.419.peg.378	65058.361.peg.310	65058.362.peg.379	65058.363.peg.310	65058.420.peg.311	65058.421.peg.376	65058.428.peg.378	65058.426.peg.379	65058.313.peg.309	65058.314.peg.201	65058.315.peg.82	65058.316.peg.307	2320456.3.peg.313	65058.317.peg.308	65058.318.peg.267	65058.319.peg.268	65058.320.peg.383	65058.321.peg.9	65058.322.peg.259	65058.323.peg.265	65058.229.peg.389	2320431.9.peg.1564	2320431.16.peg.1567	2320431.10.peg.1566	2320431.17.peg.1567	2320431.13.peg.1567	2320431.14.peg.1564	2320431.12.peg.1568	2320431.15.peg.1567	65058.241.peg.459
	423	65058.435.peg.520	65058.432.peg.501	2320431.4.peg.309	2320431.3.peg.313	65058.401.peg.308	65058.405.peg.379	65058.406.peg.268	65058.410.peg.309	65058.411.peg.269	65058.370.peg.378	65058.373.peg.378	65058.374.peg.382	65058.375.peg.382	65058.376.peg.308	65058.437.peg.360	65058.385.peg.266	65058.419.peg.379	65058.361.peg.309	65058.362.peg.380	65058.363.peg.309	65058.420.peg.310	65058.421.peg.377	65058.428.peg.379	65058.426.peg.380	65058.313.peg.308	65058.314.peg.202	65058.315.peg.81	65058.316.peg.306	2320456.3.peg.312	65058.317.peg.307	65058.318.peg.266	65058.319.peg.267	65058.320.peg.384	65058.321.peg.8	65058.322.peg.258	65058.323.peg.264	65058.229.peg.390	2320431.9.peg.1563	2320431.16.peg.1566	2320431.10.peg.1565	2320431.17.peg.1566	2320431.13.peg.1566	2320431.14.peg.1563	2320431.12.peg.1567	2320431.15.peg.1566	65058.241.peg.460
	424	65058.435.peg.521	65058.432.peg.502	2320431.4.peg.308	2320431.3.peg.312	65058.401.peg.307	65058.405.peg.380	65058.406.peg.267	65058.410.peg.308	65058.411.peg.268	65058.370.peg.379	65058.373.peg.379	65058.374.peg.383	65058.375.peg.383	65058.376.peg.307	65058.437.peg.361	65058.385.peg.265	65058.419.peg.380	65058.361.peg.308	65058.362.peg.381	65058.363.peg.308	65058.420.peg.309	65058.421.peg.378	65058.428.peg.380	65058.426.peg.381	65058.313.peg.307	65058.314.peg.203	65058.315.peg.80	65058.316.peg.305	2320456.3.peg.311	65058.317.peg.306	65058.318.peg.265	65058.319.peg.266	65058.320.peg.385	65058.321.peg.7	65058.322.peg.257	65058.323.peg.263	65058.229.peg.391	2320431.9.peg.1562	2320431.16.peg.1565	2320431.10.peg.1564	2320431.17.peg.1565	2320431.13.peg.1565	2320431.14.peg.1562	2320431.12.peg.1566	2320431.15.peg.1565	65058.241.peg.461
	425	65058.435.peg.522	65058.432.peg.503	2320431.4.peg.307	2320431.3.peg.311	65058.401.peg.306	65058.405.peg.381	65058.406.peg.266	65058.410.peg.307	65058.411.peg.267	65058.370.peg.380	65058.373.peg.380	65058.374.peg.384	65058.375.peg.384	65058.376.peg.306	65058.437.peg.362	65058.385.peg.264	65058.419.peg.381	65058.361.peg.307	65058.362.peg.382	65058.363.peg.307	65058.420.peg.308	65058.421.peg.379	65058.428.peg.381	65058.426.peg.382	65058.313.peg.306	65058.314.peg.204	65058.315.peg.79	65058.316.peg.304	2320456.3.peg.310	65058.317.peg.305	65058.318.peg.264	65058.319.peg.265	65058.320.peg.386	65058.321.peg.6	65058.322.peg.256	65058.323.peg.262	65058.229.peg.392	2320431.9.peg.1561	2320431.16.peg.1564	2320431.10.peg.1563	2320431.17.peg.1564	2320431.13.peg.1564	2320431.14.peg.1561	2320431.12.peg.1565	2320431.15.peg.1564	65058.241.peg.462
	426	65058.435.peg.523	65058.432.peg.504	2320431.4.peg.306	2320431.3.peg.310	65058.401.peg.305	65058.405.peg.382	65058.406.peg.265	65058.410.peg.306	65058.411.peg.266	65058.370.peg.381	65058.373.peg.381	65058.374.peg.385	65058.375.peg.385	65058.376.peg.305	65058.437.peg.363	65058.385.peg.263	65058.419.peg.382	65058.361.peg.306	65058.362.peg.383	65058.363.peg.306	65058.420.peg.307	65058.421.peg.380	65058.428.peg.382	65058.426.peg.383	65058.313.peg.305	65058.314.peg.205	65058.315.peg.78	65058.316.peg.303	2320456.3.peg.309	65058.317.peg.304	65058.318.peg.263	65058.319.peg.264	65058.320.peg.387	65058.321.peg.5	65058.322.peg.255	65058.323.peg.261	65058.229.peg.393	2320431.9.peg.1560	2320431.16.peg.1563	2320431.10.peg.1562	2320431.17.peg.1563	2320431.13.peg.1563	2320431.14.peg.1560	2320431.12.peg.1564	2320431.15.peg.1563	65058.241.peg.463
	427	65058.435.peg.524	65058.432.peg.506	2320431.4.peg.305	2320431.3.peg.309	65058.401.peg.304	65058.405.peg.383	65058.406.peg.264	65058.410.peg.305	65058.411.peg.264	65058.370.peg.382	65058.373.peg.382	65058.374.peg.386	65058.375.peg.387	65058.376.peg.303	65058.437.peg.364	65058.385.peg.262	65058.419.peg.383	65058.361.peg.305	65058.362.peg.384	65058.363.peg.305	65058.420.peg.306	65058.421.peg.382	65058.428.peg.383	65058.426.peg.384	65058.313.peg.304	65058.314.peg.206	65058.315.peg.77	65058.316.peg.302	2320456.3.peg.308	65058.317.peg.303	65058.318.peg.262	65058.319.peg.263	65058.320.peg.388	65058.321.peg.4	65058.322.peg.253	65058.323.peg.260	65058.229.peg.394	2320431.9.peg.1559	2320431.16.peg.1561	2320431.10.peg.1561	2320431.17.peg.1562	2320431.13.peg.1562	2320431.14.peg.1558	2320431.12.peg.1563	2320431.15.peg.1562	65058.241.peg.464
	428	65058.435.peg.525	65058.432.peg.507	2320431.4.peg.304	2320431.3.peg.308	65058.401.peg.303	65058.405.peg.384	65058.406.peg.263	65058.410.peg.304	65058.411.peg.263	65058.370.peg.383	65058.373.peg.383	65058.374.peg.387	65058.375.peg.388	65058.376.peg.302	65058.437.peg.365	65058.385.peg.261	65058.419.peg.384	65058.361.peg.304	65058.362.peg.385	65058.363.peg.304	65058.420.peg.305	65058.421.peg.383	65058.428.peg.384	65058.426.peg.385	65058.313.peg.303	65058.314.peg.207	65058.315.peg.76	65058.316.peg.301	2320456.3.peg.307	65058.317.peg.302	65058.318.peg.261	65058.319.peg.262	65058.320.peg.389	65058.321.peg.3	65058.322.peg.252	65058.323.peg.259	65058.229.peg.395	2320431.9.peg.1558	2320431.16.peg.1560	2320431.10.peg.1560	2320431.17.peg.1561	2320431.13.peg.1561	2320431.14.peg.1557	2320431.12.peg.1562	2320431.15.peg.1561	65058.241.peg.465
	429	65058.435.peg.526	65058.432.peg.508	2320431.4.peg.303	2320431.3.peg.307	65058.401.peg.302	65058.405.peg.385	65058.406.peg.262	65058.410.peg.303	65058.411.peg.262	65058.370.peg.384	65058.373.peg.384	65058.374.peg.388	65058.375.peg.389	65058.376.peg.301	65058.437.peg.366	65058.385.peg.260	65058.419.peg.385	65058.361.peg.303	65058.362.peg.386	65058.363.peg.303	65058.420.peg.304	65058.421.peg.384	65058.428.peg.385	65058.426.peg.386	65058.313.peg.302	65058.314.peg.208	65058.315.peg.75	65058.316.peg.300	2320456.3.peg.306	65058.317.peg.301	65058.318.peg.260	65058.319.peg.261	65058.320.peg.390	65058.321.peg.2	65058.322.peg.251	65058.323.peg.258	65058.229.peg.396	2320431.9.peg.1557	2320431.16.peg.1559	2320431.10.peg.1559	2320431.17.peg.1560	2320431.13.peg.1560	2320431.14.peg.1556	2320431.12.peg.1561	2320431.15.peg.1560	65058.241.peg.466
	430	65058.435.peg.527	65058.432.peg.509	2320431.4.peg.302	2320431.3.peg.306	65058.401.peg.301	65058.405.peg.386	65058.406.peg.261	65058.410.peg.302	65058.411.peg.261	65058.370.peg.385	65058.373.peg.385	65058.374.peg.389	65058.375.peg.390	65058.376.peg.300	65058.437.peg.367	65058.385.peg.259	65058.419.peg.386	65058.361.peg.302	65058.362.peg.387	65058.363.peg.302	65058.420.peg.303	65058.421.peg.385	65058.428.peg.386	65058.426.peg.387	65058.313.peg.301	65058.314.peg.209	65058.315.peg.74	65058.316.peg.299	2320456.3.peg.305	65058.317.peg.300	65058.318.peg.259	65058.319.peg.260	65058.320.peg.391	65058.321.peg.1	65058.322.peg.250	65058.323.peg.257	65058.229.peg.397	2320431.9.peg.1556	2320431.16.peg.1558	2320431.10.peg.1558	2320431.17.peg.1559	2320431.13.peg.1559	2320431.14.peg.1555	2320431.12.peg.1560	2320431.15.peg.1559	65058.241.peg.467
	431	65058.435.peg.528	65058.432.peg.510	2320431.4.peg.301	2320431.3.peg.305	65058.401.peg.300	65058.405.peg.387	65058.406.peg.260	65058.410.peg.301	65058.411.peg.260	65058.370.peg.386	65058.373.peg.386	65058.374.peg.390	65058.375.peg.391	65058.376.peg.299	65058.437.peg.368	65058.385.peg.258	65058.419.peg.387	65058.361.peg.301	65058.362.peg.388	65058.363.peg.301	65058.420.peg.302	65058.421.peg.386	65058.428.peg.387	65058.426.peg.388	65058.313.peg.300	65058.314.peg.210	65058.315.peg.73	65058.316.peg.298	2320456.3.peg.304	65058.317.peg.299	65058.318.peg.258	65058.319.peg.259	65058.320.peg.392	65058.321.peg.369	65058.322.peg.249	65058.323.peg.256	65058.229.peg.398	2320431.9.peg.1555	2320431.16.peg.1557	2320431.10.peg.1557	2320431.17.peg.1558	2320431.13.peg.1558	2320431.14.peg.1554	2320431.12.peg.1559	2320431.15.peg.1558	65058.241.peg.468
	432	65058.435.peg.529	65058.432.peg.511	2320431.4.peg.300	2320431.3.peg.304	65058.401.peg.299	65058.405.peg.388	65058.406.peg.259	65058.410.peg.300	65058.411.peg.259	65058.370.peg.387	65058.373.peg.387	65058.374.peg.391	65058.375.peg.392	65058.376.peg.298	65058.437.peg.369	65058.385.peg.257	65058.419.peg.388	65058.361.peg.300	65058.362.peg.389	65058.363.peg.300	65058.420.peg.301	65058.421.peg.387	65058.428.peg.388	65058.426.peg.389	65058.313.peg.299	65058.314.peg.211	65058.315.peg.72	65058.316.peg.297	2320456.3.peg.303	65058.317.peg.298	65058.318.peg.257	65058.319.peg.258	65058.320.peg.393	65058.321.peg.370	65058.322.peg.248	65058.323.peg.255	65058.229.peg.399	2320431.9.peg.1554	2320431.16.peg.1556	2320431.10.peg.1556	2320431.17.peg.1557	2320431.13.peg.1557	2320431.14.peg.1553	2320431.12.peg.1558	2320431.15.peg.1557	65058.241.peg.469
	433	65058.435.peg.530	65058.432.peg.512	2320431.4.peg.299	2320431.3.peg.303	65058.401.peg.298	65058.405.peg.389	65058.406.peg.258	65058.410.peg.299	65058.411.peg.258	65058.370.peg.388	65058.373.peg.388	65058.374.peg.392	65058.375.peg.393	65058.376.peg.297	65058.437.peg.370	65058.385.peg.256	65058.419.peg.389	65058.361.peg.299	65058.362.peg.390	65058.363.peg.299	65058.420.peg.300	65058.421.peg.388	65058.428.peg.389	65058.426.peg.390	65058.313.peg.298	65058.314.peg.212	65058.315.peg.71	65058.316.peg.296	2320456.3.peg.302	65058.317.peg.297	65058.318.peg.256	65058.319.peg.257	65058.320.peg.394	65058.321.peg.371	65058.322.peg.247	65058.323.peg.254	65058.229.peg.400	2320431.9.peg.1553	2320431.16.peg.1555	2320431.10.peg.1555	2320431.17.peg.1556	2320431.13.peg.1556	2320431.14.peg.1552	2320431.12.peg.1557	2320431.15.peg.1556	65058.241.peg.470
	434	65058.435.peg.531	65058.432.peg.513	2320431.4.peg.298	2320431.3.peg.302	65058.401.peg.297	65058.405.peg.390	65058.406.peg.257	65058.410.peg.298	65058.411.peg.257	65058.370.peg.389	65058.373.peg.389	65058.374.peg.393	65058.375.peg.394	65058.376.peg.296	65058.437.peg.371	65058.385.peg.255	65058.419.peg.390	65058.361.peg.298	65058.362.peg.391	65058.363.peg.298	65058.420.peg.299	65058.421.peg.389	65058.428.peg.390	65058.426.peg.391	65058.313.peg.297	65058.314.peg.213	65058.315.peg.70	65058.316.peg.295	2320456.3.peg.301	65058.317.peg.296	65058.318.peg.255	65058.319.peg.256	65058.320.peg.395	65058.321.peg.372	65058.322.peg.246	65058.323.peg.253	65058.229.peg.401	2320431.9.peg.1552	2320431.16.peg.1554	2320431.10.peg.1554	2320431.17.peg.1555	2320431.13.peg.1555	2320431.14.peg.1551	2320431.12.peg.1556	2320431.15.peg.1555	65058.241.peg.471
	435	65058.435.peg.532	65058.432.peg.514	2320431.4.peg.297	2320431.3.peg.301	65058.401.peg.296	65058.405.peg.391	65058.406.peg.256	65058.410.peg.297	65058.411.peg.256	65058.370.peg.390	65058.373.peg.390	65058.374.peg.394	65058.375.peg.395	65058.376.peg.295	65058.437.peg.372	65058.385.peg.254	65058.419.peg.391	65058.361.peg.297	65058.362.peg.392	65058.363.peg.297	65058.420.peg.298	65058.421.peg.390	65058.428.peg.391	65058.426.peg.392	65058.313.peg.296	65058.314.peg.214	65058.315.peg.69	65058.316.peg.294	2320456.3.peg.300	65058.317.peg.295	65058.318.peg.254	65058.319.peg.255	65058.320.peg.396	65058.321.peg.373	65058.322.peg.245	65058.323.peg.252	65058.229.peg.402	2320431.9.peg.1551	2320431.16.peg.1553	2320431.10.peg.1553	2320431.17.peg.1554	2320431.13.peg.1554	2320431.14.peg.1550	2320431.12.peg.1555	2320431.15.peg.1554	65058.241.peg.472
	436	65058.435.peg.533	65058.432.peg.515	2320431.4.peg.296	2320431.3.peg.300	65058.401.peg.295	65058.405.peg.392	65058.406.peg.255	65058.410.peg.296	65058.411.peg.255	65058.370.peg.391	65058.373.peg.391	65058.374.peg.395	65058.375.peg.396	65058.376.peg.294	65058.437.peg.373	65058.385.peg.253	65058.419.peg.392	65058.361.peg.296	65058.362.peg.393	65058.363.peg.296	65058.420.peg.297	65058.421.peg.391	65058.428.peg.392	65058.426.peg.393	65058.313.peg.295	65058.314.peg.215	65058.315.peg.68	65058.316.peg.293	2320456.3.peg.299	65058.317.peg.294	65058.318.peg.253	65058.319.peg.254	65058.320.peg.397	65058.321.peg.374	65058.322.peg.244	65058.323.peg.251	65058.229.peg.403	2320431.9.peg.1550	2320431.16.peg.1552	2320431.10.peg.1552	2320431.17.peg.1553	2320431.13.peg.1553	2320431.14.peg.1549	2320431.12.peg.1554	2320431.15.peg.1553	65058.241.peg.473
	437	65058.435.peg.535	65058.432.peg.516	2320431.4.peg.294	2320431.3.peg.298	65058.401.peg.293	65058.405.peg.394	65058.406.peg.253	65058.410.peg.294	65058.411.peg.253	65058.370.peg.393	65058.373.peg.393	65058.374.peg.397	65058.375.peg.398	65058.376.peg.292	65058.437.peg.375	65058.385.peg.251	65058.419.peg.394	65058.361.peg.294	65058.362.peg.395	65058.363.peg.294	65058.420.peg.295	65058.421.peg.393	65058.428.peg.394	65058.426.peg.395	65058.313.peg.293	65058.314.peg.217	65058.315.peg.66	65058.316.peg.291	2320456.3.peg.297	65058.317.peg.292	65058.318.peg.251	65058.319.peg.252	65058.320.peg.399	65058.321.peg.376	65058.322.peg.242	65058.323.peg.249	65058.229.peg.405	2320431.9.peg.1549	2320431.16.peg.1551	2320431.10.peg.1551	2320431.17.peg.1551	2320431.13.peg.1552	2320431.14.peg.1548	2320431.12.peg.1552	2320431.15.peg.1552	65058.241.peg.475
	438	65058.435.peg.536	65058.432.peg.517	2320431.4.peg.293	2320431.3.peg.297	65058.401.peg.292	65058.405.peg.395	65058.406.peg.252	65058.410.peg.293	65058.411.peg.252	65058.370.peg.394	65058.373.peg.394	65058.374.peg.398	65058.375.peg.399	65058.376.peg.291	65058.437.peg.376	65058.385.peg.250	65058.419.peg.395	65058.361.peg.293	65058.362.peg.396	65058.363.peg.293	65058.420.peg.294	65058.421.peg.394	65058.428.peg.395	65058.426.peg.396	65058.313.peg.292	65058.314.peg.218	65058.315.peg.65	65058.316.peg.290	2320456.3.peg.296	65058.317.peg.291	65058.318.peg.250	65058.319.peg.251	65058.320.peg.400	65058.321.peg.377	65058.322.peg.241	65058.323.peg.248	65058.229.peg.406	2320431.9.peg.1548	2320431.16.peg.1550	2320431.10.peg.1550	2320431.17.peg.1550	2320431.13.peg.1551	2320431.14.peg.1547	2320431.12.peg.1551	2320431.15.peg.1551	65058.241.peg.476
	439	65058.435.peg.537	65058.432.peg.518	2320431.4.peg.292	2320431.3.peg.296	65058.401.peg.291	65058.405.peg.396	65058.406.peg.251	65058.410.peg.292	65058.411.peg.251	65058.370.peg.395	65058.373.peg.395	65058.374.peg.399	65058.375.peg.400	65058.376.peg.290	65058.437.peg.377	65058.385.peg.249	65058.419.peg.396	65058.361.peg.292	65058.362.peg.397	65058.363.peg.292	65058.420.peg.293	65058.421.peg.395	65058.428.peg.396	65058.426.peg.397	65058.313.peg.291	65058.314.peg.219	65058.315.peg.64	65058.316.peg.289	2320456.3.peg.295	65058.317.peg.290	65058.318.peg.249	65058.319.peg.250	65058.320.peg.401	65058.321.peg.378	65058.322.peg.240	65058.323.peg.247	65058.229.peg.407	2320431.9.peg.1547	2320431.16.peg.1549	2320431.10.peg.1549	2320431.17.peg.1549	2320431.13.peg.1550	2320431.14.peg.1546	2320431.12.peg.1550	2320431.15.peg.1550	65058.241.peg.477
	440	65058.435.peg.538	65058.432.peg.519	2320431.4.peg.291	2320431.3.peg.295	65058.401.peg.290	65058.405.peg.397	65058.406.peg.250	65058.410.peg.291	65058.411.peg.250	65058.370.peg.396	65058.373.peg.396	65058.374.peg.400	65058.375.peg.401	65058.376.peg.289	65058.437.peg.378	65058.385.peg.248	65058.419.peg.397	65058.361.peg.291	65058.362.peg.398	65058.363.peg.291	65058.420.peg.292	65058.421.peg.396	65058.428.peg.397	65058.426.peg.398	65058.313.peg.290	65058.314.peg.220	65058.315.peg.63	65058.316.peg.288	2320456.3.peg.294	65058.317.peg.289	65058.318.peg.248	65058.319.peg.249	65058.320.peg.402	65058.321.peg.379	65058.322.peg.239	65058.323.peg.246	65058.229.peg.408	2320431.9.peg.1546	2320431.16.peg.1548	2320431.10.peg.1548	2320431.17.peg.1548	2320431.13.peg.1549	2320431.14.peg.1545	2320431.12.peg.1549	2320431.15.peg.1549	65058.241.peg.478
	441	65058.435.peg.539	65058.432.peg.520	2320431.4.peg.290	2320431.3.peg.294	65058.401.peg.289	65058.405.peg.398	65058.406.peg.249	65058.410.peg.290	65058.411.peg.249	65058.370.peg.397	65058.373.peg.397	65058.374.peg.401	65058.375.peg.402	65058.376.peg.288	65058.437.peg.379	65058.385.peg.247	65058.419.peg.398	65058.361.peg.290	65058.362.peg.399	65058.363.peg.290	65058.420.peg.291	65058.421.peg.397	65058.428.peg.398	65058.426.peg.399	65058.313.peg.289	65058.314.peg.221	65058.315.peg.62	65058.316.peg.287	2320456.3.peg.293	65058.317.peg.288	65058.318.peg.247	65058.319.peg.248	65058.320.peg.403	65058.321.peg.380	65058.322.peg.238	65058.323.peg.245	65058.229.peg.409	2320431.9.peg.1545	2320431.16.peg.1547	2320431.10.peg.1547	2320431.17.peg.1547	2320431.13.peg.1548	2320431.14.peg.1544	2320431.12.peg.1548	2320431.15.peg.1548	65058.241.peg.479
	442	65058.435.peg.540	65058.432.peg.521	2320431.4.peg.289	2320431.3.peg.293	65058.401.peg.288	65058.405.peg.399	65058.406.peg.248	65058.410.peg.289	65058.411.peg.248	65058.370.peg.398	65058.373.peg.398	65058.374.peg.402	65058.375.peg.403	65058.376.peg.287	65058.437.peg.380	65058.385.peg.246	65058.419.peg.399	65058.361.peg.289	65058.362.peg.400	65058.363.peg.289	65058.420.peg.290	65058.421.peg.398	65058.428.peg.399	65058.426.peg.400	65058.313.peg.288	65058.314.peg.222	65058.315.peg.61	65058.316.peg.286	2320456.3.peg.292	65058.317.peg.287	65058.318.peg.246	65058.319.peg.247	65058.320.peg.404	65058.321.peg.381	65058.322.peg.237	65058.323.peg.244	65058.229.peg.410	2320431.9.peg.1544	2320431.16.peg.1546	2320431.10.peg.1546	2320431.17.peg.1546	2320431.13.peg.1547	2320431.14.peg.1543	2320431.12.peg.1547	2320431.15.peg.1547	65058.241.peg.480
	443	65058.435.peg.541	65058.432.peg.522	2320431.4.peg.288	2320431.3.peg.292	65058.401.peg.287	65058.405.peg.400	65058.406.peg.247	65058.410.peg.288	65058.411.peg.247	65058.370.peg.399	65058.373.peg.399	65058.374.peg.403	65058.375.peg.404	65058.376.peg.286	65058.437.peg.381	65058.385.peg.245	65058.419.peg.400	65058.361.peg.288	65058.362.peg.401	65058.363.peg.288	65058.420.peg.289	65058.421.peg.399	65058.428.peg.400	65058.426.peg.401	65058.313.peg.287	65058.314.peg.223	65058.315.peg.60	65058.316.peg.285	2320456.3.peg.291	65058.317.peg.286	65058.318.peg.245	65058.319.peg.246	65058.320.peg.405	65058.321.peg.382	65058.322.peg.236	65058.323.peg.243	65058.229.peg.411	2320431.9.peg.1543	2320431.16.peg.1545	2320431.10.peg.1545	2320431.17.peg.1545	2320431.13.peg.1546	2320431.14.peg.1542	2320431.12.peg.1546	2320431.15.peg.1546	65058.241.peg.481
	444	65058.435.peg.542	65058.432.peg.523	2320431.4.peg.287	2320431.3.peg.291	65058.401.peg.286	65058.405.peg.401	65058.406.peg.246	65058.410.peg.287	65058.411.peg.246	65058.370.peg.400	65058.373.peg.400	65058.374.peg.404	65058.375.peg.405	65058.376.peg.285	65058.437.peg.382	65058.385.peg.244	65058.419.peg.401	65058.361.peg.287	65058.362.peg.402	65058.363.peg.287	65058.420.peg.288	65058.421.peg.400	65058.428.peg.401	65058.426.peg.402	65058.313.peg.286	65058.314.peg.224	65058.315.peg.59	65058.316.peg.284	2320456.3.peg.290	65058.317.peg.285	65058.318.peg.244	65058.319.peg.245	65058.320.peg.406	65058.321.peg.383	65058.322.peg.235	65058.323.peg.242	65058.229.peg.412	2320431.9.peg.1542	2320431.16.peg.1544	2320431.10.peg.1544	2320431.17.peg.1544	2320431.13.peg.1545	2320431.14.peg.1541	2320431.12.peg.1545	2320431.15.peg.1545	65058.241.peg.482
	445	65058.435.peg.543	65058.432.peg.524	2320431.4.peg.286	2320431.3.peg.290	65058.401.peg.285	65058.405.peg.402	65058.406.peg.245	65058.410.peg.286	65058.411.peg.245	65058.370.peg.401	65058.373.peg.401	65058.374.peg.405	65058.375.peg.406	65058.376.peg.284	65058.437.peg.383	65058.385.peg.243	65058.419.peg.402	65058.361.peg.286	65058.362.peg.403	65058.363.peg.286	65058.420.peg.287	65058.421.peg.401	65058.428.peg.402	65058.426.peg.403	65058.313.peg.285	65058.314.peg.225	65058.315.peg.58	65058.316.peg.283	2320456.3.peg.289	65058.317.peg.284	65058.318.peg.243	65058.319.peg.244	65058.320.peg.407	65058.321.peg.384	65058.322.peg.234	65058.323.peg.241	65058.229.peg.413	2320431.9.peg.1541	2320431.16.peg.1543	2320431.10.peg.1543	2320431.17.peg.1543	2320431.13.peg.1544	2320431.14.peg.1540	2320431.12.peg.1544	2320431.15.peg.1544	65058.241.peg.483
	446	65058.435.peg.544	65058.432.peg.525	2320431.4.peg.285	2320431.3.peg.289	65058.401.peg.284	65058.405.peg.403	65058.406.peg.244	65058.410.peg.285	65058.411.peg.244	65058.370.peg.402	65058.373.peg.402	65058.374.peg.406	65058.375.peg.407	65058.376.peg.283	65058.437.peg.384	65058.385.peg.242	65058.419.peg.403	65058.361.peg.285	65058.362.peg.404	65058.363.peg.285	65058.420.peg.286	65058.421.peg.402	65058.428.peg.403	65058.426.peg.404	65058.313.peg.284	65058.314.peg.226	65058.315.peg.57	65058.316.peg.282	2320456.3.peg.288	65058.317.peg.283	65058.318.peg.242	65058.319.peg.243	65058.320.peg.408	65058.321.peg.385	65058.322.peg.233	65058.323.peg.240	65058.229.peg.414	2320431.9.peg.1540	2320431.16.peg.1542	2320431.10.peg.1542	2320431.17.peg.1542	2320431.13.peg.1543	2320431.14.peg.1539	2320431.12.peg.1543	2320431.15.peg.1543	65058.241.peg.484
	447	65058.435.peg.545	65058.432.peg.526	2320431.4.peg.284	2320431.3.peg.288	65058.401.peg.283	65058.405.peg.404	65058.406.peg.243	65058.410.peg.284	65058.411.peg.243	65058.370.peg.403	65058.373.peg.403	65058.374.peg.407	65058.375.peg.408	65058.376.peg.282	65058.437.peg.385	65058.385.peg.241	65058.419.peg.404	65058.361.peg.284	65058.362.peg.405	65058.363.peg.284	65058.420.peg.285	65058.421.peg.403	65058.428.peg.404	65058.426.peg.405	65058.313.peg.283	65058.314.peg.227	65058.315.peg.56	65058.316.peg.281	2320456.3.peg.287	65058.317.peg.282	65058.318.peg.241	65058.319.peg.242	65058.320.peg.409	65058.321.peg.386	65058.322.peg.232	65058.323.peg.239	65058.229.peg.415	2320431.9.peg.1539	2320431.16.peg.1541	2320431.10.peg.1541	2320431.17.peg.1541	2320431.13.peg.1542	2320431.14.peg.1538	2320431.12.peg.1542	2320431.15.peg.1542	65058.241.peg.485
	448	65058.435.peg.546	65058.432.peg.527	2320431.4.peg.283	2320431.3.peg.287	65058.401.peg.282	65058.405.peg.405	65058.406.peg.242	65058.410.peg.283	65058.411.peg.242	65058.370.peg.404	65058.373.peg.404	65058.374.peg.408	65058.375.peg.409	65058.376.peg.281	65058.437.peg.386	65058.385.peg.240	65058.419.peg.405	65058.361.peg.283	65058.362.peg.406	65058.363.peg.283	65058.420.peg.284	65058.421.peg.404	65058.428.peg.405	65058.426.peg.406	65058.313.peg.282	65058.314.peg.228	65058.315.peg.55	65058.316.peg.280	2320456.3.peg.286	65058.317.peg.281	65058.318.peg.240	65058.319.peg.241	65058.320.peg.410	65058.321.peg.387	65058.322.peg.231	65058.323.peg.238	65058.229.peg.416	2320431.9.peg.1538	2320431.16.peg.1540	2320431.10.peg.1540	2320431.17.peg.1540	2320431.13.peg.1541	2320431.14.peg.1537	2320431.12.peg.1541	2320431.15.peg.1541	65058.241.peg.486
	449	65058.435.peg.547	65058.432.peg.528	2320431.4.peg.282	2320431.3.peg.286	65058.401.peg.281	65058.405.peg.406	65058.406.peg.241	65058.410.peg.282	65058.411.peg.241	65058.370.peg.405	65058.373.peg.405	65058.374.peg.409	65058.375.peg.410	65058.376.peg.280	65058.437.peg.387	65058.385.peg.239	65058.419.peg.406	65058.361.peg.282	65058.362.peg.407	65058.363.peg.282	65058.420.peg.283	65058.421.peg.405	65058.428.peg.406	65058.426.peg.407	65058.313.peg.281	65058.314.peg.229	65058.315.peg.54	65058.316.peg.279	2320456.3.peg.285	65058.317.peg.280	65058.318.peg.239	65058.319.peg.240	65058.320.peg.411	65058.321.peg.388	65058.322.peg.230	65058.323.peg.237	65058.229.peg.417	2320431.9.peg.1537	2320431.16.peg.1539	2320431.10.peg.1539	2320431.17.peg.1539	2320431.13.peg.1540	2320431.14.peg.1536	2320431.12.peg.1540	2320431.15.peg.1540	65058.241.peg.487
	450	65058.435.peg.548	65058.432.peg.529	2320431.4.peg.281	2320431.3.peg.285	65058.401.peg.280	65058.405.peg.407	65058.406.peg.240	65058.410.peg.281	65058.411.peg.240	65058.370.peg.406	65058.373.peg.406	65058.374.peg.410	65058.375.peg.411	65058.376.peg.279	65058.437.peg.388	65058.385.peg.238	65058.419.peg.407	65058.361.peg.281	65058.362.peg.408	65058.363.peg.281	65058.420.peg.282	65058.421.peg.406	65058.428.peg.407	65058.426.peg.408	65058.313.peg.280	65058.314.peg.230	65058.315.peg.53	65058.316.peg.278	2320456.3.peg.284	65058.317.peg.279	65058.318.peg.238	65058.319.peg.239	65058.320.peg.412	65058.321.peg.389	65058.322.peg.229	65058.323.peg.236	65058.229.peg.418	2320431.9.peg.1536	2320431.16.peg.1538	2320431.10.peg.1538	2320431.17.peg.1538	2320431.13.peg.1539	2320431.14.peg.1535	2320431.12.peg.1539	2320431.15.peg.1539	65058.241.peg.488
	451	65058.435.peg.549	65058.432.peg.530	2320431.4.peg.280	2320431.3.peg.284	65058.401.peg.279	65058.405.peg.408	65058.406.peg.239	65058.410.peg.280	65058.411.peg.239	65058.370.peg.407	65058.373.peg.407	65058.374.peg.411	65058.375.peg.412	65058.376.peg.278	65058.437.peg.389	65058.385.peg.237	65058.419.peg.408	65058.361.peg.280	65058.362.peg.409	65058.363.peg.280	65058.420.peg.281	65058.421.peg.407	65058.428.peg.408	65058.426.peg.409	65058.313.peg.279	65058.314.peg.231	65058.315.peg.52	65058.316.peg.277	2320456.3.peg.283	65058.317.peg.278	65058.318.peg.237	65058.319.peg.238	65058.320.peg.413	65058.321.peg.390	65058.322.peg.228	65058.323.peg.235	65058.229.peg.419	2320431.9.peg.1535	2320431.16.peg.1537	2320431.10.peg.1537	2320431.17.peg.1537	2320431.13.peg.1538	2320431.14.peg.1534	2320431.12.peg.1538	2320431.15.peg.1538	65058.241.peg.489
	452	65058.435.peg.550	65058.432.peg.531	2320431.4.peg.279	2320431.3.peg.283	65058.401.peg.278	65058.405.peg.409	65058.406.peg.238	65058.410.peg.279	65058.411.peg.238	65058.370.peg.408	65058.373.peg.408	65058.374.peg.412	65058.375.peg.413	65058.376.peg.277	65058.437.peg.390	65058.385.peg.236	65058.419.peg.409	65058.361.peg.279	65058.362.peg.410	65058.363.peg.279	65058.420.peg.280	65058.421.peg.408	65058.428.peg.409	65058.426.peg.410	65058.313.peg.278	65058.314.peg.232	65058.315.peg.51	65058.316.peg.276	2320456.3.peg.282	65058.317.peg.277	65058.318.peg.236	65058.319.peg.237	65058.320.peg.414	65058.321.peg.391	65058.322.peg.227	65058.323.peg.234	65058.229.peg.420	2320431.9.peg.1534	2320431.16.peg.1536	2320431.10.peg.1536	2320431.17.peg.1536	2320431.13.peg.1537	2320431.14.peg.1533	2320431.12.peg.1537	2320431.15.peg.1537	65058.241.peg.490
	453	65058.435.peg.551	65058.432.peg.532	2320431.4.peg.278	2320431.3.peg.282	65058.401.peg.277	65058.405.peg.410	65058.406.peg.237	65058.410.peg.278	65058.411.peg.237	65058.370.peg.409	65058.373.peg.409	65058.374.peg.413	65058.375.peg.414	65058.376.peg.276	65058.437.peg.391	65058.385.peg.235	65058.419.peg.410	65058.361.peg.278	65058.362.peg.411	65058.363.peg.278	65058.420.peg.279	65058.421.peg.409	65058.428.peg.410	65058.426.peg.411	65058.313.peg.277	65058.314.peg.233	65058.315.peg.50	65058.316.peg.275	2320456.3.peg.281	65058.317.peg.276	65058.318.peg.235	65058.319.peg.236	65058.320.peg.415	65058.321.peg.392	65058.322.peg.226	65058.323.peg.233	65058.229.peg.421	2320431.9.peg.1533	2320431.16.peg.1535	2320431.10.peg.1535	2320431.17.peg.1535	2320431.13.peg.1536	2320431.14.peg.1532	2320431.12.peg.1536	2320431.15.peg.1536	65058.241.peg.491
	454	65058.435.peg.552	65058.432.peg.533	2320431.4.peg.277	2320431.3.peg.281	65058.401.peg.276	65058.405.peg.411	65058.406.peg.236	65058.410.peg.277	65058.411.peg.236	65058.370.peg.410	65058.373.peg.410	65058.374.peg.414	65058.375.peg.415	65058.376.peg.275	65058.437.peg.392	65058.385.peg.234	65058.419.peg.411	65058.361.peg.277	65058.362.peg.412	65058.363.peg.277	65058.420.peg.278	65058.421.peg.410	65058.428.peg.411	65058.426.peg.412	65058.313.peg.276	65058.314.peg.234	65058.315.peg.49	65058.316.peg.274	2320456.3.peg.280	65058.317.peg.275	65058.318.peg.234	65058.319.peg.235	65058.320.peg.416	65058.321.peg.393	65058.322.peg.225	65058.323.peg.232	65058.229.peg.422	2320431.9.peg.1532	2320431.16.peg.1534	2320431.10.peg.1534	2320431.17.peg.1534	2320431.13.peg.1535	2320431.14.peg.1531	2320431.12.peg.1535	2320431.15.peg.1535	65058.241.peg.492
	455	65058.435.peg.553	65058.432.peg.534	2320431.4.peg.276	2320431.3.peg.280	65058.401.peg.275	65058.405.peg.412	65058.406.peg.235	65058.410.peg.276	65058.411.peg.235	65058.370.peg.411	65058.373.peg.411	65058.374.peg.415	65058.375.peg.416	65058.376.peg.274	65058.437.peg.393	65058.385.peg.233	65058.419.peg.412	65058.361.peg.276	65058.362.peg.413	65058.363.peg.276	65058.420.peg.277	65058.421.peg.411	65058.428.peg.412	65058.426.peg.413	65058.313.peg.275	65058.314.peg.235	65058.315.peg.48	65058.316.peg.273	2320456.3.peg.279	65058.317.peg.274	65058.318.peg.233	65058.319.peg.234	65058.320.peg.417	65058.321.peg.394	65058.322.peg.224	65058.323.peg.231	65058.229.peg.423	2320431.9.peg.1531	2320431.16.peg.1533	2320431.10.peg.1533	2320431.17.peg.1533	2320431.13.peg.1534	2320431.14.peg.1530	2320431.12.peg.1534	2320431.15.peg.1534	65058.241.peg.493
	456	65058.435.peg.554	65058.432.peg.535	2320431.4.peg.275	2320431.3.peg.279	65058.401.peg.274	65058.405.peg.413	65058.406.peg.234	65058.410.peg.275	65058.411.peg.234	65058.370.peg.412	65058.373.peg.412	65058.374.peg.416	65058.375.peg.417	65058.376.peg.273	65058.437.peg.394	65058.385.peg.232	65058.419.peg.413	65058.361.peg.275	65058.362.peg.414	65058.363.peg.275	65058.420.peg.276	65058.421.peg.412	65058.428.peg.413	65058.426.peg.414	65058.313.peg.274	65058.314.peg.236	65058.315.peg.47	65058.316.peg.272	2320456.3.peg.278	65058.317.peg.273	65058.318.peg.232	65058.319.peg.233	65058.320.peg.418	65058.321.peg.395	65058.322.peg.223	65058.323.peg.230	65058.229.peg.424	2320431.9.peg.1530	2320431.16.peg.1532	2320431.10.peg.1532	2320431.17.peg.1532	2320431.13.peg.1533	2320431.14.peg.1529	2320431.12.peg.1533	2320431.15.peg.1533	65058.241.peg.494
	457	65058.435.peg.555	65058.432.peg.536	2320431.4.peg.274	2320431.3.peg.278	65058.401.peg.273	65058.405.peg.414	65058.406.peg.233	65058.410.peg.274	65058.411.peg.233	65058.370.peg.413	65058.373.peg.413	65058.374.peg.417	65058.375.peg.418	65058.376.peg.272	65058.437.peg.395	65058.385.peg.231	65058.419.peg.414	65058.361.peg.274	65058.362.peg.415	65058.363.peg.274	65058.420.peg.275	65058.421.peg.413	65058.428.peg.414	65058.426.peg.415	65058.313.peg.273	65058.314.peg.237	65058.315.peg.46	65058.316.peg.271	2320456.3.peg.277	65058.317.peg.272	65058.318.peg.231	65058.319.peg.232	65058.320.peg.419	65058.321.peg.396	65058.322.peg.222	65058.323.peg.229	65058.229.peg.425	2320431.9.peg.1529	2320431.16.peg.1531	2320431.10.peg.1531	2320431.17.peg.1531	2320431.13.peg.1532	2320431.14.peg.1528	2320431.12.peg.1532	2320431.15.peg.1532	65058.241.peg.495
	458	65058.435.peg.556	65058.432.peg.537	2320431.4.peg.273	2320431.3.peg.277	65058.401.peg.272	65058.405.peg.415	65058.406.peg.232	65058.410.peg.273	65058.411.peg.232	65058.370.peg.414	65058.373.peg.414	65058.374.peg.418	65058.375.peg.419	65058.376.peg.271	65058.437.peg.396	65058.385.peg.230	65058.419.peg.415	65058.361.peg.273	65058.362.peg.416	65058.363.peg.273	65058.420.peg.274	65058.421.peg.414	65058.428.peg.415	65058.426.peg.416	65058.313.peg.272	65058.314.peg.238	65058.315.peg.45	65058.316.peg.270	2320456.3.peg.276	65058.317.peg.271	65058.318.peg.230	65058.319.peg.231	65058.320.peg.420	65058.321.peg.397	65058.322.peg.221	65058.323.peg.228	65058.229.peg.426	2320431.9.peg.1528	2320431.16.peg.1530	2320431.10.peg.1530	2320431.17.peg.1530	2320431.13.peg.1531	2320431.14.peg.1527	2320431.12.peg.1531	2320431.15.peg.1531	65058.241.peg.496
	459	65058.435.peg.557	65058.432.peg.538	2320431.4.peg.272	2320431.3.peg.276	65058.401.peg.271	65058.405.peg.416	65058.406.peg.231	65058.410.peg.272	65058.411.peg.231	65058.370.peg.415	65058.373.peg.415	65058.374.peg.419	65058.375.peg.420	65058.376.peg.270	65058.437.peg.397	65058.385.peg.229	65058.419.peg.416	65058.361.peg.272	65058.362.peg.417	65058.363.peg.272	65058.420.peg.273	65058.421.peg.415	65058.428.peg.416	65058.426.peg.417	65058.313.peg.271	65058.314.peg.239	65058.315.peg.44	65058.316.peg.269	2320456.3.peg.275	65058.317.peg.270	65058.318.peg.229	65058.319.peg.230	65058.320.peg.421	65058.321.peg.398	65058.322.peg.220	65058.323.peg.227	65058.229.peg.427	2320431.9.peg.1527	2320431.16.peg.1529	2320431.10.peg.1529	2320431.17.peg.1529	2320431.13.peg.1530	2320431.14.peg.1526	2320431.12.peg.1530	2320431.15.peg.1530	65058.241.peg.497
	460	65058.435.peg.558	65058.432.peg.539	2320431.4.peg.271	2320431.3.peg.275	65058.401.peg.270	65058.405.peg.417	65058.406.peg.230	65058.410.peg.271	65058.411.peg.230	65058.370.peg.416	65058.373.peg.416	65058.374.peg.420	65058.375.peg.421	65058.376.peg.269	65058.437.peg.398	65058.385.peg.228	65058.419.peg.417	65058.361.peg.271	65058.362.peg.418	65058.363.peg.271	65058.420.peg.272	65058.421.peg.416	65058.428.peg.417	65058.426.peg.418	65058.313.peg.270	65058.314.peg.240	65058.315.peg.43	65058.316.peg.268	2320456.3.peg.274	65058.317.peg.269	65058.318.peg.228	65058.319.peg.229	65058.320.peg.422	65058.321.peg.399	65058.322.peg.219	65058.323.peg.226	65058.229.peg.428	2320431.9.peg.1526	2320431.16.peg.1528	2320431.10.peg.1528	2320431.17.peg.1528	2320431.13.peg.1529	2320431.14.peg.1525	2320431.12.peg.1529	2320431.15.peg.1529	65058.241.peg.498
	461	65058.435.peg.559	65058.432.peg.540	2320431.4.peg.270	2320431.3.peg.274	65058.401.peg.269	65058.405.peg.418	65058.406.peg.229	65058.410.peg.270	65058.411.peg.229	65058.370.peg.417	65058.373.peg.417	65058.374.peg.421	65058.375.peg.422	65058.376.peg.268	65058.437.peg.399	65058.385.peg.227	65058.419.peg.418	65058.361.peg.270	65058.362.peg.419	65058.363.peg.270	65058.420.peg.271	65058.421.peg.417	65058.428.peg.418	65058.426.peg.419	65058.313.peg.269	65058.314.peg.241	65058.315.peg.42	65058.316.peg.267	2320456.3.peg.273	65058.317.peg.268	65058.318.peg.227	65058.319.peg.228	65058.320.peg.423	65058.321.peg.400	65058.322.peg.218	65058.323.peg.225	65058.229.peg.429	2320431.9.peg.1525	2320431.16.peg.1527	2320431.10.peg.1527	2320431.17.peg.1527	2320431.13.peg.1528	2320431.14.peg.1524	2320431.12.peg.1528	2320431.15.peg.1528	65058.241.peg.499
	462	65058.435.peg.560	65058.432.peg.541	2320431.4.peg.269	2320431.3.peg.273	65058.401.peg.268	65058.405.peg.419	65058.406.peg.228	65058.410.peg.269	65058.411.peg.228	65058.370.peg.418	65058.373.peg.418	65058.374.peg.422	65058.375.peg.423	65058.376.peg.267	65058.437.peg.400	65058.385.peg.226	65058.419.peg.419	65058.361.peg.269	65058.362.peg.420	65058.363.peg.269	65058.420.peg.270	65058.421.peg.418	65058.428.peg.419	65058.426.peg.420	65058.313.peg.268	65058.314.peg.242	65058.315.peg.41	65058.316.peg.266	2320456.3.peg.272	65058.317.peg.267	65058.318.peg.226	65058.319.peg.227	65058.320.peg.424	65058.321.peg.401	65058.322.peg.217	65058.323.peg.224	65058.229.peg.430	2320431.9.peg.1524	2320431.16.peg.1526	2320431.10.peg.1526	2320431.17.peg.1526	2320431.13.peg.1527	2320431.14.peg.1523	2320431.12.peg.1527	2320431.15.peg.1527	65058.241.peg.500
[truncated: 1,765 more rows]

## Sheet: Shared genome
Virulence / Niche factor	Shared genome (623)	Cs04-13	Cs05-13	Cs5182	CsKL0182	CsKL0183	CsKL0259	CsKL0260	CsKL0374	CsKL0382	CsKL0386	CsKL0394	CsKL0395	CsKL0396	CsKL0400	CsKL0401	CsKL0581	CsKL0598	CsKL0615	CsKL0707	CsKL0709	CsKL0773	CsKL0774	CsKL0882	CsKL0883	CsKL0884	CsKL0886	CsKL0887	CsKL0938	CsKL0957	CsKL0968	CsKL1003	CsKL1006	CsKL1007	CsKL1008	CsKL1009	CsKL1010	CsKL1196	CsPO100-5	CsPO101-5	CsPO102-5	CsPO104-5	CsPO105-5	CsPO25-4	CsPO38-4	CsPO39-4	CsW25
[truncated: 623 more rows]

## Sheet: Singletons
Virulence / Niche factor	Singletons (111)	Cs04-13	Cs05-13	Cs5182	CsKL0182	CsKL0183	CsKL0259	CsKL0260	CsKL0374	CsKL0382	CsKL0386	CsKL0394	CsKL0395	CsKL0396	CsKL0400	CsKL0401	CsKL0581	CsKL0598	CsKL0615	CsKL0707	CsKL0709	CsKL0773	CsKL0774	CsKL0882	CsKL0883	CsKL0884	CsKL0886	CsKL0887	CsKL0938	CsKL0957	CsKL0968	CsKL1003	CsKL1006	CsKL1007	CsKL1008	CsKL1009	CsKL1010	CsKL1196	CsPO100-5	CsPO101-5	CsPO102-5	CsPO104-5	CsPO105-5	CsPO25-4	CsPO38-4	CsPO39-4	CsW25
[truncated: 111 more rows]
