# Supplementary material for: Analysis of Corynebacterium silvaticum genomes from Portugal reveals a single cluster and a clade suggested to produce diphtheria toxin
Source: PeerJ. 2023 Mar 9;11:e14895. doi: 10.7717/peerj.14895 (PMC10008321; doi:10.7717/peerj.14895)
Supplement: Supplemental Information 16 [file peerj-11-14895-s016.xlsx]

## Sheet: pangenomics
##################
usage: pandev.pl pangenome.txt start_point stop.point sorting
##################
Pangenome development
The final formula is n = 2619.956499449694929252586218483990676689*n^0.03193229564576654896311019764469283365777								γ = 0.03193229564576654896311019764469283365777
The fitted data is :								α = (1-γ)
2619.96								α = 0.968
2692.12
2735.25
2766.27
2790.57
2810.59
2827.62
2842.46
2855.62
2867.44
2878.17
2888
2897.08
2905.51
2913.38
2920.76
2927.7
2934.27
2940.5
2946.42
2952.06
2957.44
2962.6
2967.55
2972.3
2976.88
2981.28
2985.54
2989.65
2993.62
2997.47
3001.2
3004.83
3008.34
3011.77
3015.09
3018.33
3021.49
3024.57
3027.57
3030.5
3033.37
3036.17
3038.9
3041.58
3044.2
END
Core genome development
2618.2	2556.5	2514
2556.5	2514	2486.35
2514	2486.35	2465.8
2486.35	2465.8	2442.65
2465.8	2442.65	2434.35
2442.65	2434.35	2420.25
2434.35	2420.25	2404.75
2420.25	2404.75	2394.3
2404.75	2394.3	2385
2394.3	2385	2374.6
2385	2374.6	2369
2374.6	2369	2361.15
2369	2361.15	2354.9
2361.15	2354.9	2350.4
2354.9	2350.4	2346.85
2350.4	2346.85	2338.05
2346.85	2338.05	2330.65
2338.05	2330.65	2323.65
2330.65	2323.65	2317.25
2323.65	2317.25	2313.7
2317.25	2313.7	2308.3
2313.7	2308.3	2307.05
2308.3	2307.05	2302.4
2307.05	2302.4	2300.2
2302.4	2300.2	2296.75
2300.2	2296.75	2287.7
2296.75	2287.7	2281.75
2287.7	2281.75	2278.1
2281.75	2278.1	2273.55
2278.1	2273.55	2271.55
2273.55	2271.55	2265.65
2271.55	2265.65	2262.35
2265.65	2262.35	2259.7
2262.35	2259.7	2258.15
2259.7	2258.15	2251.8
2258.15	2251.8	2248.15
2251.8	2248.15	2242.75
2248.15	2242.75	2240.8
2242.75	2240.8	2238.85
2240.8	2238.85	2237.6
2238.85	2237.6	2236.9
2237.6	2236.9	2233.1
2236.9	2233.1	2227.45
2233.1	2227.45	2227
The mean tg is 1488.712019230769230769230769230769230769
The mean t is 209.0832659885523410073786903277113194656
The mean k is 934.7096047371515783426862198918439778017
The final formula is n = 934.7096047371515783426862198918439778017*exp[-x/209.0832659885523410073786903277113194656]+1488.712019230769230769230769230769230769
The fitted data is :
2418.96
2414.52
2410.11
2405.71
2401.34
2396.98
2392.65
2388.34
2384.04
2379.77
2375.52
2371.29
2367.08
2362.89
2358.72
2354.57
2350.44
2346.33
2342.23
2338.16
2334.11
2330.08
2326.06
2322.07
2318.09
2314.14
2310.2
2306.28
2302.38
2298.5
2294.63
2290.79
2286.96
2283.15
2279.36
2275.59
2271.84
2268.1
2264.38
2260.68
2257
2253.33
2249.68
2246.05
2242.44
2238.85
END
Singletons development
2618.2	58.4	39.45
58.4	39.45	28.6
39.45	28.6	22.35
28.6	22.35	15.85
22.35	15.85	13.95
15.85	13.95	12.4
13.95	12.4	9.95
12.4	9.95	8.45
9.95	8.45	7.95
8.45	7.95	7.3
7.95	7.3	5.8
7.3	5.8	5.7
5.8	5.7	5.65
5.7	5.65	5.35
5.65	5.35	5.2
5.35	5.2	4.85
5.2	4.85	4.75
4.85	4.75	4.5
4.75	4.5	4.25
4.5	4.25	4.2
4.25	4.2	4.1
4.2	4.1	3.75
4.1	3.75	3.6
3.75	3.6	3.6
3.6	3.6	3.3
3.6	3.3	3.3
3.3	3.3	3.15
3.3	3.15	3.1
3.15	3.1	3
3.1	3	2.85
3	2.85	2.8
2.85	2.8	2.75
2.8	2.75	2.7
2.75	2.7	2.7
2.7	2.7	2.65
2.7	2.65	2.55
2.65	2.55	2.55
2.55	2.55	2.55
2.55	2.55	2.55
2.55	2.55	2.35
2.55	2.35	2.25
2.35	2.25	2.05
2.25	2.05	1.9
2.05	1.9	1.8
The mean tg is 0.8178571428571428571428571428571428571429
The mean t is 19.29672006408414186520770476621416285651
The mean k is 14.78867497226979101029707650303610886757
The final formula is n = 14.78867497226979101029707650303610886757*exp[-x/19.29672006408414186520770476621416285651]+0.8178571428571428571428571428571428571429
The fitted data is :
14.8597
14.1507
13.4774
12.8381
12.2311
11.6548
11.1076
10.588
10.0946
9.62614
9.18135
8.75901
8.35801
7.97725
7.61572
7.27245
6.94651
6.63703
6.34317
6.06416
5.79924
5.54769
5.30885
5.08206
4.86673
4.66227
4.46814
4.28381
4.10879
3.94261
3.78482
3.63499
3.49274
3.35766
3.22941
3.10763
2.992
2.88222
2.77797
2.67899
2.58501
2.49577
2.41104
2.33059
2.2542
2.18167
END
