# Supplementary material for: Analysis of Corynebacterium silvaticum genomes from Portugal reveals a single cluster and a clade suggested to produce diphtheria toxin
Source: PeerJ. 2023 Mar 9;11:e14895. doi: 10.7717/peerj.14895 (PMC10008321; doi:10.7717/peerj.14895)
Supplement: Supplemental Information 18 [file peerj-11-14895-s018.xlsx]

## Sheet: Exclusive genes annotation
Exclusively shared by C. silvaticum strains from Portugal
Orthogroup	GI	Prophage	Product	BV-BRC ID		RefSeq Locus Tag	BV-BRC genus-specific families (PLfams)	BV-BRC cross-genus families (PGfams)	GO	AA Length	Gene	Description	COG_category	seed_ortholog	evalue	score	eggNOG_OGs	max_annot_lvl	GOs	EC	KEGG_ko	KEGG_Pathway	KEGG_Module	KEGG_Reaction	KEGG_rclass	BRITE	KEGG_TC	CAZy	BiGG_Reaction	PFAMs
OG0002728			Hypothetical protein	2320431.9.peg.1919						77
OG0002729			D-3-phosphoglycerate dehydrogenase (EC 1.1.1.95)	2320431.9.peg.1969			PLF_1716_00009391	PGF_00012987	GO:0004617|phosphoglycerate dehydrogenase activity	108	pdxB	Phosphoglycerate dehydrogenase and related dehydrogenases	EH	1719.CPTC_02174	2.2e-51	208.0	COG0111@1|root,COG0111@2|Bacteria,2GP09@201174|Actinobacteria,22JN3@1653|Corynebacteriaceae	201174|Actinobacteria	-	-	-	-	-	-	-	-	-	-	-	2-Hacid_dh_C
OG0002720	-	I	Putative secreted protein	2320431.9.peg.241			PLF_1716_00003970	PGF_01373601		110	-	-	-	698964.CDPW8_0178	6.8e-40	169.9	2AVTA@1|root,31MKS@2|Bacteria,2HQ9N@201174|Actinobacteria,22QTK@1653|Corynebacteriaceae	201174|Actinobacteria	-	-	-	-	-	-	-	-	-	-	-	-
OG0002730	GI 18	IV	Putative membrane protein	2320431.9.peg.2165			PLF_1716_00002927	PGF_01365873		47	-	-	-	698964.CDPW8_0177	2.2e-11	73.9	2AU4J@1|root,31JR8@2|Bacteria,2HNVA@201174|Actinobacteria,22P3X@1653|Corynebacteriaceae	201174|Actinobacteria	-	-	-	-	-	-	-	-	-	-	-	-
OG0002731	GI 19	IV	Putative membrane protein	2320431.9.peg.2166			PLF_1716_00041064	PGF_01374997		89	-	-	-	945712.CULC22_01673	8e-23	112.8	2AU4J@1|root,31JR8@2|Bacteria,2HNVA@201174|Actinobacteria,22P3X@1653|Corynebacteriaceae	201174|Actinobacteria	-	-	-	-	-	-	-	-	-	-	-	-
OG0002732			MutT3	2320431.9.peg.2288			PLF_1716_00002000	PGF_00989345		44	-	NTP pyrophosphohydrolases including oxidative damage repair enzymes	F	945712.CULC22_02061	4.4e-14	82.8	COG1051@1|root,COG1051@2|Bacteria,2I2K5@201174|Actinobacteria,22NKS@1653|Corynebacteriaceae	201174|Actinobacteria	-	3.6.1.55	ko:K03574	-	-	-	-	ko00000,ko01000,ko03400	-	-	-	NUDIX
OG0002733	GI 22	-	Hypothetical protein	2320431.9.peg.2336			PLF_1716_00095543	PGF_09505115		198
OG0002734			Hypothetical protein	2320431.9.peg.2348						62
OG0002735	PAI 8	-	Hypothetical protein	2320431.9.peg.2451			PLF_1716_00015894	PGF_08225224		310	-	Amidohydrolase	S	1719.CPTC_00837	2.3e-133	481.9	COG1473@1|root,COG1473@2|Bacteria,2I2MJ@201174|Actinobacteria,22RH3@1653|Corynebacteriaceae	201174|Actinobacteria	-	-	-	-	-	-	-	-	-	-	-	-
OG0002736	PAI 9	-	Hypothetical protein	2320431.9.peg.2529						38
OG0002737			Indole-3-glycerol phosphate synthase (EC 4.1.1.48) / Phosphoribosylanthranilate isomerase (EC 5.3.1.24)	2320431.9.peg.2605			PLF_1716_00004651	PGF_00014053	GO:0004425|indole-3-glycerol-phosphate synthase activity;GO:0004640|phosphoribosylanthranilate isomerase activity	120	trpF	Belongs to the TrpF family	E	945712.CULC22_02330	3.6e-58	230.7	COG0134@1|root,COG0135@1|root,COG0134@2|Bacteria,COG0135@2|Bacteria,2I2MF@201174|Actinobacteria,22KDB@1653|Corynebacteriaceae	201174|Actinobacteria	-	4.1.1.48,5.3.1.24	ko:K13498	ko00400,ko01100,ko01110,ko01130,ko01230,map00400,map01100,map01110,map01130,map01230	M00023	R03508,R03509	RC00944,RC00945	ko00000,ko00001,ko00002,ko01000	-	-	-	IGPS,PRAI
OG0002738			Hypothetical protein	2320431.9.peg.2607						45
OG0002721			Hypothetical protein	2320431.9.peg.564			PLF_1716_00008113	PGF_00088760		75
OG0002722			Putative transport protein	2320431.9.peg.639			PLF_1716_00093366	PGF_05663464		47
OG0002723	PAI 4	II	Hypothetical protein	2320431.9.peg.772				PGF_08268677		127
OG0002724	PAI 4	II	Hypothetical protein	2320431.9.peg.773						47
OG0002725	PAI 4	-	Hypothetical protein	2320431.9.peg.825			PLF_1716_00002236	PGF_08225224		342	-	Helicase conserved C-terminal domain	K	945712.CULC22_00644	2e-170	605.1	COG2378@1|root,COG2378@2|Bacteria,2GURQ@201174|Actinobacteria,22JTC@1653|Corynebacteriaceae	201174|Actinobacteria	-	-	-	-	-	-	-	-	-	-	-	Helicase_C_3
OG0002726			Ribosomal-protein-S5p-alanine acetyltransferase	2320431.9.peg.910			PLF_1716_00008187	PGF_12797363		96	rimJ	Acetyltransferases including N-acetylases of ribosomal proteins	J	1719.CPTC_01211	1.4e-44	185.3	COG1670@1|root,COG1670@2|Bacteria,2HAFI@201174|Actinobacteria,22JZU@1653|Corynebacteriaceae	201174|Actinobacteria	-	2.3.1.128	ko:K03790	-	-	-	-	ko00000,ko01000,ko03009	-	-	-	Acetyltransf_3
OG0002727			Putative secreted protein	2320431.9.peg.928			PLF_1716_00007419	PGF_01381357		100
Exclusively shared by C. silvaticum strains from Portugal and strain 05-13
Orthogroup			Product	BV-BRC ID		RefSeq Locus Tag	BV-BRC genus-specific families (PLfams)	BV-BRC cross-genus families (PGfams)	GO	AA Length	Gene	Description	COG_category	seed_ortholog	evalue	score	eggNOG_OGs	max_annot_lvl	GOs	EC	KEGG_ko	KEGG_Pathway	KEGG_Module	KEGG_Reaction	KEGG_rclass	BRITE	KEGG_TC	CAZy	BiGG_Reaction	PFAMs
OG0002685			Predicted signal-transduction protein containing cAMP-binding and CBS domains	2320431.9.peg.1183			PLF_1716_00002017	PGF_01054812		185	-	Signal-transduction protein containing cAMP-binding and CBS domains	T	945712.CULC22_00961	8.1e-86	323.2	COG2905@1|root,COG2905@2|Bacteria,2I91C@201174|Actinobacteria,22KWJ@1653|Corynebacteriaceae	201174|Actinobacteria	-	-	ko:K07182	-	-	-	-	ko00000	-	-	-	CBS,DUF294,DUF294_C,cNMP_binding
OG0002704			Putative integral membrane protein	2320431.9.peg.139						73
OG0002684	GI 14	III	DNA polymerase I (EC 2.7.7.7), phage-associated	2320431.9.peg.1666			PLF_1716_00043793	PGF_01377791	GO:0003887|DNA-directed DNA polymerase activity	56	-	In addition to polymerase activity, this DNA polymerase exhibits 5'-3' exonuclease activity	L	1236514.BAKL01000055_gene3870	4.1e-09	66.6	COG0749@1|root,COG0749@2|Bacteria,4PK8J@976|Bacteroidetes,2FU9T@200643|Bacteroidia	976|Bacteroidetes	-	-	-	-	-	-	-	-	-	-	-	DNA_pol_A
OG0002683			Transcription accessory protein (S1 RNA-binding domain)	2320431.9.peg.1699			PLF_1716_00000358	PGF_02906681		215	yhgF	Accessory protein	K	945712.CULC22_01438	1.5e-96	359.0	COG2183@1|root,COG2183@2|Bacteria,2GKCI@201174|Actinobacteria,22JR2@1653|Corynebacteriaceae	201174|Actinobacteria	-	-	ko:K06959	-	-	-	-	ko00000	-	-	-	HHH_3,S1,Tex_N,Tex_YqgF
OG0002706			Hypothetical protein	2320431.9.peg.1944			PLF_1716_00051379	PGF_01358807		46
OG0002705	GI 4	I	Hypothetical protein	2320431.9.peg.235			PLF_1716_00099023	PGF_08225224		346	-	-	-	945712.CULC22_01935	6e-66	258.1	29XKZ@1|root,30JC7@2|Bacteria,2I6SI@201174|Actinobacteria,22P6A@1653|Corynebacteriaceae	201174|Actinobacteria	-	-	-	-	-	-	-	-	-	-	-	-
OG0002707			Hypothetical protein	2320431.9.peg.2132			PLF_1716_00096950	PGF_10073113		38
OG0002689	GI 19	-	Choline dehydrogenase (EC 1.1.99.1)	2320431.9.peg.2236			PLF_1716_00000841	PGF_00861656	GO:0008812|choline dehydrogenase activity	134	betA	Involved in the biosynthesis of the osmoprotectant glycine betaine. Catalyzes the oxidation of choline to betaine aldehyde and betaine aldehyde to glycine betaine at the same rate	C	945712.CULC22_02014	2e-70	271.6	COG2303@1|root,COG2303@2|Bacteria,2GJAU@201174|Actinobacteria,22K3S@1653|Corynebacteriaceae	201174|Actinobacteria	-	1.1.99.1	ko:K00108	ko00260,ko01100,map00260,map01100	M00555	R01025	RC00087	ko00000,ko00001,ko00002,ko01000	-	-	-	GMC_oxred_C,GMC_oxred_N
OG0002703			Hypothetical protein	2320431.9.peg.401			PLF_1716_00007570	PGF_01381452		38
OG0002702	GI 9 / -		Hypothetical protein	2320431.9.peg.732						38
OG0002701	PAI 4	II	Hypothetical protein	2320431.9.peg.765			PLF_1716_00066043	PGF_00273218		274	-	Protein of unknown function (Hypoth_ymh)	S	883066.HMPREF9233_00584	1.5e-64	253.1	28IYH@1|root,2Z8W7@2|Bacteria,2I9TM@201174|Actinobacteria	201174|Actinobacteria	-	-	-	-	-	-	-	-	-	-	-	Hypoth_Ymh
OG0002700	PAI 4	II	FIG00524775: Hypothetical protein	2320431.9.peg.779			PLF_1716_00011628	PGF_00149006		65	-	Domain of unknown function (DUF4314)	S	883066.HMPREF9233_00597	5.5e-29	132.9	COG2105@1|root,COG2105@2|Bacteria,2HCZY@201174|Actinobacteria,4D7TA@85005|Actinomycetales	201174|Actinobacteria	-	-	-	-	-	-	-	-	-	-	-	DUF4314
OG0002699	PAI 4	II	Hypothetical protein	2320431.9.peg.780			PLF_1716_00017306	PGF_08219547		111	-	-	-	662755.CRES_1557	1.2e-47	195.7	2AU29@1|root,31JNG@2|Bacteria,2IJMS@201174|Actinobacteria	201174|Actinobacteria	-	-	-	-	-	-	-	-	-	-	-	-
OG0002698	PAI 4	II	Hypothetical protein	2320431.9.peg.781			PLF_1716_00011846	PGF_12951962		95	-	-	-	883066.HMPREF9233_00599	3.8e-39	167.2	2CDB6@1|root,33IA2@2|Bacteria,2IP8R@201174|Actinobacteria,4D65J@85005|Actinomycetales	201174|Actinobacteria	-	-	-	-	-	-	-	-	-	-	-	-
OG0002697	PAI 4	II	Hypothetical protein	2320431.9.peg.784			PLF_1716_00096402	PGF_09495976		198	-	-	-	40041.SZO_02300	8.8e-30	137.1	2E82F@1|root,332GG@2|Bacteria,1VHG0@1239|Firmicutes,4HYGS@91061|Bacilli	91061|Bacilli	-	-	-	-	-	-	-	-	-	-	-	-
OG0002696	PAI 4	II	Hypothetical protein	2320431.9.peg.794			PLF_1716_00066987	PGF_06414088		171	-	-	-	1224164.B843_03455	2.2e-21	109.0	2C94N@1|root,33BC5@2|Bacteria,2GS64@201174|Actinobacteria	201174|Actinobacteria	-	1.13.11.3	ko:K00448	ko00362,ko00624,ko01100,ko01120,ko01220,map00362,map00624,map01100,map01120,map01220	-	R01631,R03549	RC00388,RC00953	br01602,ko00000,ko00001,ko01000	-	-	-	-
OG0002695	PAI 4	II	Hypothetical protein	2320431.9.peg.799			PLF_1716_00095141	PGF_08841630		72	-	-	-	585198.HMPREF0574_0623	6.1e-21	106.3	2FFMQ@1|root,347J4@2|Bacteria,2H98U@201174|Actinobacteria,4D67I@85005|Actinomycetales	201174|Actinobacteria	-	-	-	-	-	-	-	-	-	-	-	-
OG0002694	PAI 4	II	Transcriptional regulator, PadR family	2320431.9.peg.806			PLF_1716_00008563	PGF_01662006		108	-	Transcriptional regulator PadR-like family	K	1403948.Q618_VCMC00001G0904	7.4e-39	166.4	COG1695@1|root,COG1695@2|Bacteria,2HRHQ@201174|Actinobacteria,4D6AW@85005|Actinomycetales	201174|Actinobacteria	-	-	-	-	-	-	-	-	-	-	-	PadR
OG0002693	PAI 4	II	Integral membrane protein	2320431.9.peg.807			PLF_1716_00009984	PGF_01382445		231	-	-	-	1219585.HMPREF1631_05135	2.6e-81	308.5	2F8HD@1|root,340W7@2|Bacteria,2GW6A@201174|Actinobacteria,4D6EN@85005|Actinomycetales	201174|Actinobacteria	-	-	-	-	-	-	-	-	-	-	-	-
OG0002692	PAI 4	II	Hypothetical protein	2320431.9.peg.808			PLF_1716_00059734	PGF_05021368		112	-	-	-	1403948.Q618_VCMC00001G0906	9.1e-32	142.9	2ASD2@1|root,31HSH@2|Bacteria,2H0IN@201174|Actinobacteria,4D6QA@85005|Actinomycetales	201174|Actinobacteria	-	-	-	-	-	-	-	-	-	-	-	PLDc_N
OG0002691	PAI 4	II	Efflux ABC transporter, ATP-binding protein	2320431.9.peg.809			PLF_1716_00085586	PGF_00884706		275	-	ATPases associated with a variety of cellular activities	V	1403948.Q618_VCMC00001G0907	5.2e-121	440.7	COG1131@1|root,COG1131@2|Bacteria,2GKWB@201174|Actinobacteria,4D7X4@85005|Actinomycetales	201174|Actinobacteria	-	-	ko:K01990	-	M00254	-	-	ko00000,ko00002,ko02000	3.A.1	-	-	ABC_tran,PLDc_N
OG0002690	PAI 4	II	ABC transporter, permease protein	2320431.9.peg.810			PLF_1716_00067950	PGF_07613829		259	-	ABC-type transport system involved in multi-copper enzyme maturation permease component	S	1219585.HMPREF1631_05120	8.1e-108	396.7	COG1277@1|root,COG1277@2|Bacteria,2GRTV@201174|Actinobacteria,4D6GK@85005|Actinomycetales	201174|Actinobacteria	-	-	ko:K01992	-	M00254	-	-	ko00000,ko00002,ko02000	3.A.1	-	-	ABC2_membrane_2
OG0002688	PAI 4	-	DNA repair helicase	2320431.9.peg.824			PLF_1716_00000783	PGF_04674543		279	ercc3	DNA or RNA helicases of superfamily II	L	945712.CULC22_00643	9e-113	413.3	COG1061@1|root,COG1061@2|Bacteria,2GIR9@201174|Actinobacteria,22K67@1653|Corynebacteriaceae	201174|Actinobacteria	-	3.6.4.12	ko:K10843	ko03022,ko03420,map03022,map03420	M00290	-	-	ko00000,ko00001,ko00002,ko01000,ko03021,ko03400	-	-	-	ERCC3_RAD25_C,Helicase_C_3,ResIII
OG0002687			Putative ATP-dependent helicase	2320431.9.peg.871			PLF_1716_00003513	PGF_01369096		202	lhr	Lhr-like helicases	L	1414719.CBYN010000148_gene1637	6.4e-44	184.1	COG1201@1|root,COG1201@2|Bacteria,2GJG3@201174|Actinobacteria,22JQ6@1653|Corynebacteriaceae	201174|Actinobacteria	-	-	ko:K03724	-	-	-	-	ko00000,ko01000,ko03400	-	-	-	DEAD,DEAD_assoc,HTH_42,Helicase_C
OG0002686			Putative ATP-dependent helicase	2320431.9.peg.873			PLF_1716_00021219	PGF_01369096		666	lhr	Lhr-like helicases	L	945712.CULC22_00690	0.0	1118.2	COG1201@1|root,COG1201@2|Bacteria,2GJG3@201174|Actinobacteria,22JQ6@1653|Corynebacteriaceae	201174|Actinobacteria	-	-	ko:K03724	-	-	-	-	ko00000,ko01000,ko03400	-	-	-	DEAD,DEAD_assoc,HTH_42,Helicase_C
Exclusively shared by the remaining strains
Orthogroup			Product	BV-BRC ID v1	BV-BRC ID v2	RefSeq Locus Tag	BV-BRC genus-specific families (PLfams)	BV-BRC cross-genus families (PGfams)	GO	AA Length	Gene	Description	COG_category	seed_ortholog	evalue	score	eggNOG_OGs	max_annot_lvl	GOs	EC	KEGG_ko	KEGG_Pathway	KEGG_Module	KEGG_Reaction	KEGG_rclass	BRITE	KEGG_TC	CAZy	BiGG_Reaction	PFAMs
OG0002515			Di-tripeptide/cation symporter DtpT	2320431.3.peg.15	2320431.19.peg.1208		PLF_1716_00001339	PGF_02030730		99	dtpT	POT family	E	1435356.Y013_11685	2.1e-19	101.7	COG3104@1|root,COG3104@2|Bacteria,2GKB1@201174|Actinobacteria,4FUES@85025|Nocardiaceae	201174|Actinobacteria	-	-	ko:K03305	-	-	-	-	ko00000	2.A.17	-	-	PTR2
OG0002514			Acyl-CoA thioesterase II (EC 3.1.2.-)	2320431.3.peg.260	2320431.19.peg.1449		PLF_1716_00000780	PGF_00922738	GO:0016289|CoA hydrolase activity;GO:0016289|2-oxoglutaryl-CoA thioesterase activity;GO:0016289|2,4,4-trimethyl-3-oxopentanoyl-CoA thioesterase activity;GO:0016289|3-isopropylbut-3-enoyl-CoA thioesterase activity;GO:0016289|glutaryl-CoA hydrolase activity;GO:0016289|acyl-CoA hydrolase activity	62	-
OG0002513			No significant database matches	2320431.3.peg.325	2320431.19.peg.1515	ET810_01500	PLF_1716_00006417	PGF_12938468		47
OG0002512			No significant database matches	2320431.3.peg.326	2320431.19.peg.1516		PLF_1716_00006417	PGF_12938468		110	-	Ferrous iron binding	S	945712.CULC22_01354	3.1e-40	171.0	COG3885@1|root,COG3885@2|Bacteria,2INTC@201174|Actinobacteria,22NGF@1653|Corynebacteriaceae	201174|Actinobacteria	-	-	-	-	-	-	-	-	-	-	-	-
OG0002502			ATP-dependent RNA helicase	2320431.3.peg.64	2320431.19.peg.1255		PLF_1716_00000674	PGF_00017259		194	rhlE_2	Superfamily II DNA and RNA helicases	L	945712.CULC22_01073	3e-91	341.3	COG0513@1|root,COG0513@2|Bacteria,2GIUR@201174|Actinobacteria,22JZC@1653|Corynebacteriaceae	201174|Actinobacteria	-	-	-	-	-	-	-	-	-	-	-	DEAD,Helicase_C
OG0002511			Efflux ABC transporter, permease/ATP-binding protein	2320431.3.peg.684	2320431.19.peg.1865	ET810_03075	PLF_1716_00027542	PGF_03192541		193	ywjA	ABC-type multidrug transport system, ATPase and permease components	V	945712.CULC22_01643	6.5e-94	350.1	COG1132@1|root,COG1132@2|Bacteria,2GJWP@201174|Actinobacteria,22JPR@1653|Corynebacteriaceae	201174|Actinobacteria	-	-	ko:K06147,ko:K18893	ko02010,map02010	-	-	-	ko00000,ko00001,ko02000	3.A.1,3.A.1.106,3.A.1.109,3.A.1.21	-	-	ABC_membrane,ABC_tran
OG0002529	GI 3	-	YscS-like amidohydrolase	2320431.3.peg.1257	2320431.19.peg.96		PLF_1716_00027655	PGF_06798036		197	-	COG0624 Acetylornithine deacetylase Succinyl-diaminopimelate desuccinylase and related deacylases	E	1719.CPTC_00610	4.9e-65	254.2	COG0624@1|root,COG0624@2|Bacteria,2GKKW@201174|Actinobacteria,22KPM@1653|Corynebacteriaceae	201174|Actinobacteria	-	-	-	-	-	-	-	-	-	-	-	M20_dimer,Peptidase_M20,Peptidase_M28
OG0002530	PAI 1	-	Manganese ABC transporter, ATP-binding protein SitB	2320431.3.peg.1331	2320431.19.peg.170		PLF_1716_00085514	PGF_08225224		64	-	Transport system, ATP-binding protein	P	945712.CULC22_00156	3.1e-24	117.1	COG1121@1|root,COG1121@2|Bacteria,2IGQM@201174|Actinobacteria,22R7N@1653|Corynebacteriaceae	201174|Actinobacteria	-	-	ko:K11710	ko02010,map02010	M00319	-	-	ko00000,ko00001,ko00002,ko02000	3.A.1.15	-	-	ABC_tran
OG0002531	GI 4	I	FIG00547403: Hypothetical protein	2320431.3.peg.1397	2320431.19.peg.234	ET810_04670	PLF_1716_00101258	PGF_08225224		129
OG0002526			Succinate-semialdehyde dehydrogenase	2320431.3.peg.1106	2320431.19.peg.2569					203	gabD	Belongs to the aldehyde dehydrogenase family	C	945712.CULC22_02309	6.2e-71	273.9	COG1012@1|root,COG1012@2|Bacteria,2GIWZ@201174|Actinobacteria,22K91@1653|Corynebacteriaceae	201174|Actinobacteria	-	1.2.1.16,1.2.1.20,1.2.1.79	ko:K00135	ko00250,ko00310,ko00350,ko00650,ko00760,ko01100,ko01120,map00250,map00310,map00350,map00650,map00760,map01100,map01120	M00027	R00713,R00714,R02401	RC00080	ko00000,ko00001,ko00002,ko01000	-	-	-	Aldedh
OG0002527	GI 25	-	Phytoene synthase (EC 2.5.1.32)	2320431.3.peg.1126	2320431.19.peg.2589				GO:0016767|geranylgeranyl-diphosphate geranylgeranyltransferase activity	76	crtB	Phytoene squalene synthetase	I	945712.CULC22_02324	4.4e-30	136.7	COG1562@1|root,COG1562@2|Bacteria,2GJN2@201174|Actinobacteria,22JJI@1653|Corynebacteriaceae	201174|Actinobacteria	GO:0003674,GO:0003824,GO:0004337,GO:0004659,GO:0006629,GO:0006720,GO:0006721,GO:0008150,GO:0008152,GO:0008299,GO:0008610,GO:0009058,GO:0009987,GO:0016108,GO:0016109,GO:0016114,GO:0016116,GO:0016117,GO:0016740,GO:0016765,GO:0016767,GO:0042440,GO:0044237,GO:0044238,GO:0044249,GO:0044255,GO:0046148,GO:0071704,GO:1901576	2.5.1.32,2.5.1.99	ko:K02291	ko00906,ko01062,ko01100,ko01110,map00906,map01062,map01100,map01110	M00097	R02065,R04218,R07270,R10177	RC00362,RC01101,RC02869	ko00000,ko00001,ko00002,ko01000,ko01006	-	-	-	SQS_PSY
OG0002528	GI 25	-	Phytoene dehydrogenase (EC 1.14.99.-)	2320431.3.peg.1129	2320431.19.peg.2592	ET810_03490	PLF_1716_00001488	PGF_10319157	GO:0009974|zeinoxanthin epsilon hydroxylase activity;GO:0009974|DDT 2,3-dioxygenase activity;GO:0009974|naphthalene disulfonate 1,2-dioxygenase activity;GO:0009974|benzo(a)pyrene 11,12-epoxidase activity;GO:0009974|omega-3 fatty acid desaturase activity;GO:0009974|gamma-glutamyl hercynylcysteine sulfoxide synthase;GO:0009974|echinenone 3-hydroxylase activity;GO:0009974|4-ketotorulene 3-hydroxylas…	261	crtI	Phytoene dehydrogenase and related proteins	Q	945712.CULC22_02325	2.7e-135	488.0	COG1233@1|root,COG1233@2|Bacteria,2GJAV@201174|Actinobacteria,22JM4@1653|Corynebacteriaceae	201174|Actinobacteria	-	1.3.99.26,1.3.99.28,1.3.99.29,1.3.99.31	ko:K10027	ko00906,ko01100,ko01110,map00906,map01100,map01110	-	R04787,R04798,R04800,R09691,R09692	RC01214,RC02088,RC02605	ko00000,ko00001,ko01000	-	-	-	Amino_oxidase
OG0002532	GI 6	-	Oligopeptide transporter, OPT family	2320431.3.peg.1585	2320431.19.peg.343		PLF_1716_00001991	PGF_02473492		310	opt	Transporter	S	945712.CULC22_00271	7.2e-87	327.4	COG1297@1|root,COG1297@2|Bacteria,2I9UD@201174|Actinobacteria,22KI2@1653|Corynebacteriaceae	201174|Actinobacteria	-	-	-	-	-	-	-	-	-	-	-	OPT
OG0002533	GI 5	-	Hypothetical protein	2320431.3.peg.1653	2320431.19.peg.275	ET810_05805	PLF_1716_00021860	PGF_08225224		140
OG0002522	GI 22	-	Hypothetical protein	2320431.3.peg.1878	2320431.19.peg.2353	ET810_06780	PLF_1716_00009564	PGF_01382263		106
OG0002525	GI 18	IV	Hypothetical protein	2320431.3.peg.1696	2320431.19.peg.2169					48
OG0002523	PAI 5	-	Betaine aldehyde dehydrogenase (EC 1.2.1.8)	2320431.3.peg.1754	2320431.19.peg.2229		PLF_1716_00021007	PGF_00402817	GO:0008802|betaine-aldehyde dehydrogenase activity	263	gbsA	Belongs to the aldehyde dehydrogenase family	C	945712.CULC22_02012	1.1e-128	466.1	COG1012@1|root,COG1012@2|Bacteria,2GIWZ@201174|Actinobacteria,22JYG@1653|Corynebacteriaceae	201174|Actinobacteria	-	1.2.1.8	ko:K00130	ko00260,ko01100,map00260,map01100	M00555	R02565,R02566	RC00080	ko00000,ko00001,ko00002,ko01000	-	-	-	Aldedh
OG0002518			Multicopper oxidase	2320431.3.peg.2021	2320431.19.peg.885	ET810_07410				46
OG0002516			Acetyl-coenzyme A carboxyl transferase alpha chain (EC 6.4.1.2) / Acetyl-coenzyme A carboxyl transferase beta chain (EC 6.4.1.2)	2320431.3.peg.1910	2320431.19.peg.778		PLF_1716_00001056	PGF_00026289	GO:0003989|acetyl-CoA carboxylase activity	153	accD3	Acetyl-CoA carboxylase	I	945712.CULC22_00658	1.1e-72	279.3	COG0777@1|root,COG0825@1|root,COG0777@2|Bacteria,COG0825@2|Bacteria,2GNP7@201174|Actinobacteria,22JRH@1653|Corynebacteriaceae	201174|Actinobacteria	GO:0005575,GO:0005623,GO:0005886,GO:0006082,GO:0006629,GO:0006631,GO:0006633,GO:0008150,GO:0008152,GO:0008610,GO:0009058,GO:0009059,GO:0009273,GO:0009987,GO:0016020,GO:0016053,GO:0019752,GO:0032787,GO:0034645,GO:0042546,GO:0043170,GO:0043436,GO:0044036,GO:0044038,GO:0044085,GO:0044237,GO:0044238,GO:0044249,GO:0044255,GO:0044260,GO:0044281,GO:0044283,GO:0044464,GO:0046394,GO:0070589,GO:0071554,GO:…	2.1.3.15,6.4.1.2	ko:K01962,ko:K01963	ko00061,ko00620,ko00640,ko00720,ko01100,ko01110,ko01120,ko01130,ko01200,ko01212,map00061,map00620,map00640,map00720,map01100,map01110,map01120,map01130,map01200,map01212	M00082,M00376	R00742,R04386	RC00040,RC00253,RC00367	ko00000,ko00001,ko00002,ko01000	-	-	-	Carboxyl_trans
OG0002517			Endonuclease VIII	2320431.3.peg.1944	2320431.19.peg.810	ET810_07060	PLF_1716_00012524	PGF_01200912		157	nei	Formamidopyrimidine-DNA glycosylase	L	945712.CULC22_00692	1.4e-83	315.5	COG0266@1|root,COG0266@2|Bacteria,2GKCW@201174|Actinobacteria,22KDM@1653|Corynebacteriaceae	201174|Actinobacteria	GO:0003674,GO:0003676,GO:0003677,GO:0003690,GO:0003824,GO:0005488,GO:0006139,GO:0006259,GO:0006281,GO:0006725,GO:0006807,GO:0006950,GO:0006974,GO:0008150,GO:0008152,GO:0009987,GO:0016787,GO:0016798,GO:0016799,GO:0019104,GO:0033554,GO:0034641,GO:0043170,GO:0044237,GO:0044238,GO:0044260,GO:0046483,GO:0050896,GO:0051716,GO:0071704,GO:0090304,GO:0097159,GO:0140097,GO:1901360,GO:1901363	4.2.99.18	ko:K05522	ko03410,map03410	-	-	-	ko00000,ko00001,ko01000,ko03400	-	-	-	Fapy_DNA_glyco,H2TH,zf-FPG_IleRS
OG0002520			ABC transporter, substrate-binding protein (cluster 8, B12/iron complex)	2320431.3.peg.2083	2320431.19.peg.1096	ET810_07710	PLF_1716_00066638	PGF_03694933		85	fhuD	ABC-type Fe3 -hydroxamate transport system, periplasmic component	P	1719.CPTC_01428	4.9e-38	163.3	COG0614@1|root,COG0614@2|Bacteria,2GKZJ@201174|Actinobacteria,22KWV@1653|Corynebacteriaceae	201174|Actinobacteria	-	-	ko:K02016	ko02010,map02010	M00240	-	-	ko00000,ko00001,ko00002,ko02000	3.A.1.14	-	-	Peripla_BP_2
OG0002519			Hypothetical protein	2320431.3.peg.2122	2320431.19.peg.1057					41
OG0002536	GI 10	-	Hypothetical protein	2320431.3.peg.2501	2320431.19.peg.727	ET810_09595	PLF_1716_00073412	PGF_08225224		175
OG0002537	GI 10	-	L-asparagine permease	2320431.3.peg.2505	2320431.19.peg.731		PLF_1716_00002072	PGF_07319485		148	ansP	Gamma-aminobutyrate permease and related permeases	E	945712.CULC22_00617	1.2e-71	275.8	COG1113@1|root,COG1113@2|Bacteria,2GJ0X@201174|Actinobacteria,22JJS@1653|Corynebacteriaceae	201174|Actinobacteria	GO:0005575,GO:0005576	-	ko:K11738	-	-	-	-	ko00000,ko02000	2.A.3.1.8	-	iNJ661.Rv0346c	AA_permease
OG0002535			Hypothetical protein	2320431.3.peg.2414	2320431.19.peg.642		PLF_1716_00000613	PGF_08225224		99	-	Ligase activity	HJ	945712.CULC22_00534	1.3e-50	205.3	COG0189@1|root,COG0189@2|Bacteria,2H85M@201174|Actinobacteria,22JNY@1653|Corynebacteriaceae	201174|Actinobacteria	-	-	-	-	-	-	-	-	-	-	-	-
OG0002540	GI 17	-	Hypothetical protein	2320431.3.peg.810	2320431.19.peg.2029	ET810_10780		PGF_06704790		184	-	-	-	1122228.AQXR01000008_gene650	1.8e-56	225.7	2F87B@1|root,340KM@2|Bacteria,2HZYM@201174|Actinobacteria,4D2A2@85004|Bifidobacteriales	201174|Actinobacteria	-	-	-	-	-	-	-	-	-	-	-	-
OG0002541	GI 17	II	Hypothetical protein	2320431.3.peg.817	2320431.19.peg.2036	ET810_10815				64
OG0002542	GI 17	II	Hypothetical protein	2320431.3.peg.822	2320431.19.peg.2041	ET810_10845		PGF_02376331		146	-	-	-	596328.HMPREF0578_1240	1.8e-59	235.3	2CCEK@1|root,34CGI@2|Bacteria,2GVC6@201174|Actinobacteria,4D6QQ@85005|Actinomycetales	201174|Actinobacteria	-	-	-	-	-	-	-	-	-	-	-	-
OG0002543	GI 17	II	Transcriptional regulator, Xre family	2320431.3.peg.823	2320431.19.peg.2042	ET810_10850		PGF_06335969		65	-	Helix-turn-helix domain	K	596328.HMPREF0578_1239	4.3e-26	123.2	COG1476@1|root,COG1476@2|Bacteria,2GQIU@201174|Actinobacteria,4D6A3@85005|Actinomycetales	201174|Actinobacteria	-	-	ko:K07729	-	-	-	-	ko00000,ko03000	-	-	-	HTH_3
OG0002544	GI 17	II	Hypothetical protein	2320431.3.peg.833	2320431.19.peg.2052	ET810_10900				260	-	Protein of unknown function (DUF1643)	S	585198.HMPREF0574_0612	7e-59	234.2	2B6V2@1|root,31ZUM@2|Bacteria,2H2T6@201174|Actinobacteria,4D75W@85005|Actinomycetales	201174|Actinobacteria	-	-	-	-	-	-	-	-	-	-	-	DUF1643
OG0002545	GI 17	-	Hypothetical protein	2320431.3.peg.836	2320431.19.peg.2055			PGF_05817943		109	-	-	-	1111131.HMPREF1255_1459	1.2e-15	89.4	2FDH6@1|root,345IQ@2|Bacteria,2H8J5@201174|Actinobacteria	201174|Actinobacteria	-	-	-	-	-	-	-	-	-	-	-	-
OG0002546	GI 17	III	Hypothetical protein	2320431.3.peg.842	2320431.19.peg.2061	ET810_10945				278	-	Abortive infection C-terminus	S	435830.HMPREF0045_00164	2.9e-71	275.4	28KAG@1|root,2Z9XS@2|Bacteria,2IAIK@201174|Actinobacteria	201174|Actinobacteria	-	-	-	-	-	-	-	-	-	-	-	Abi_C
OG0002547	GI 17	III	Hypothetical protein	2320431.3.peg.850	2320431.19.peg.2069					43
OG0002548	GI 17	III	Conserved hypothetical phage AbiD protein	2320431.3.peg.851	2320431.19.peg.2070	ET810_10990	PLF_1716_00047755	PGF_05372996		313	-	Abi-like protein	V	1224164.B843_03595	9.6e-164	582.8	COG4823@1|root,COG4823@2|Bacteria,2IDRD@201174|Actinobacteria,22RFS@1653|Corynebacteriaceae	201174|Actinobacteria	-	-	-	-	-	-	-	-	-	-	-	Abi_2
OG0002549			Hypothetical protein	2320431.3.peg.924	2320431.19.peg.2143	ET810_11360	PLF_1716_00002147	PGF_03042667		43	-	Acetyltransferases and hydrolases with the alpha beta hydrolase fold	S	945712.CULC22_01914	7.3e-14	82.0	COG1075@1|root,COG1075@2|Bacteria,2IFKT@201174|Actinobacteria,22NB4@1653|Corynebacteriaceae	201174|Actinobacteria	-	-	-	-	-	-	-	-	-	-	-	Abhydrolase_1,Abhydrolase_6,Hydrolase_4
OG0002534	GI 8	-	Homoserine O-acetyltransferase (EC 2.3.1.31)	2320431.3.peg.1024	2320431.19.peg.605		PLF_1716_00000436	PGF_00012329	GO:0004414|homoserine O-acetyltransferase activity	98	metXA	Transfers an acetyl group from acetyl-CoA to L- homoserine, forming acetyl-L-homoserine	E	945712.CULC22_00502	1.6e-40	171.8	COG2021@1|root,COG2021@2|Bacteria,2GKNJ@201174|Actinobacteria,22JM5@1653|Corynebacteriaceae	201174|Actinobacteria	GO:0000096,GO:0000097,GO:0003674,GO:0003824,GO:0004414,GO:0005575,GO:0005623,GO:0005886,GO:0006082,GO:0006520,GO:0006555,GO:0006790,GO:0006807,GO:0008150,GO:0008152,GO:0008374,GO:0008652,GO:0009058,GO:0009066,GO:0009067,GO:0009069,GO:0009086,GO:0009092,GO:0009987,GO:0016020,GO:0016053,GO:0016407,GO:0016413,GO:0016740,GO:0016746,GO:0016747,GO:0019752,GO:0040007,GO:0043436,GO:0044237,GO:0044238,GO:…	2.3.1.31	ko:K00641	ko00270,ko01100,ko01130,map00270,map01100,map01130	-	R01776	RC00004,RC00041	ko00000,ko00001,ko01000	-	-	-	Abhydrolase_1
