# Supplementary material for: Analysis of Corynebacterium silvaticum genomes from Portugal reveals a single cluster and a clade suggested to produce diphtheria toxin
Source: PeerJ journal article supplement (doi:10.7717/peerj.14895), 2023-03-09

**A**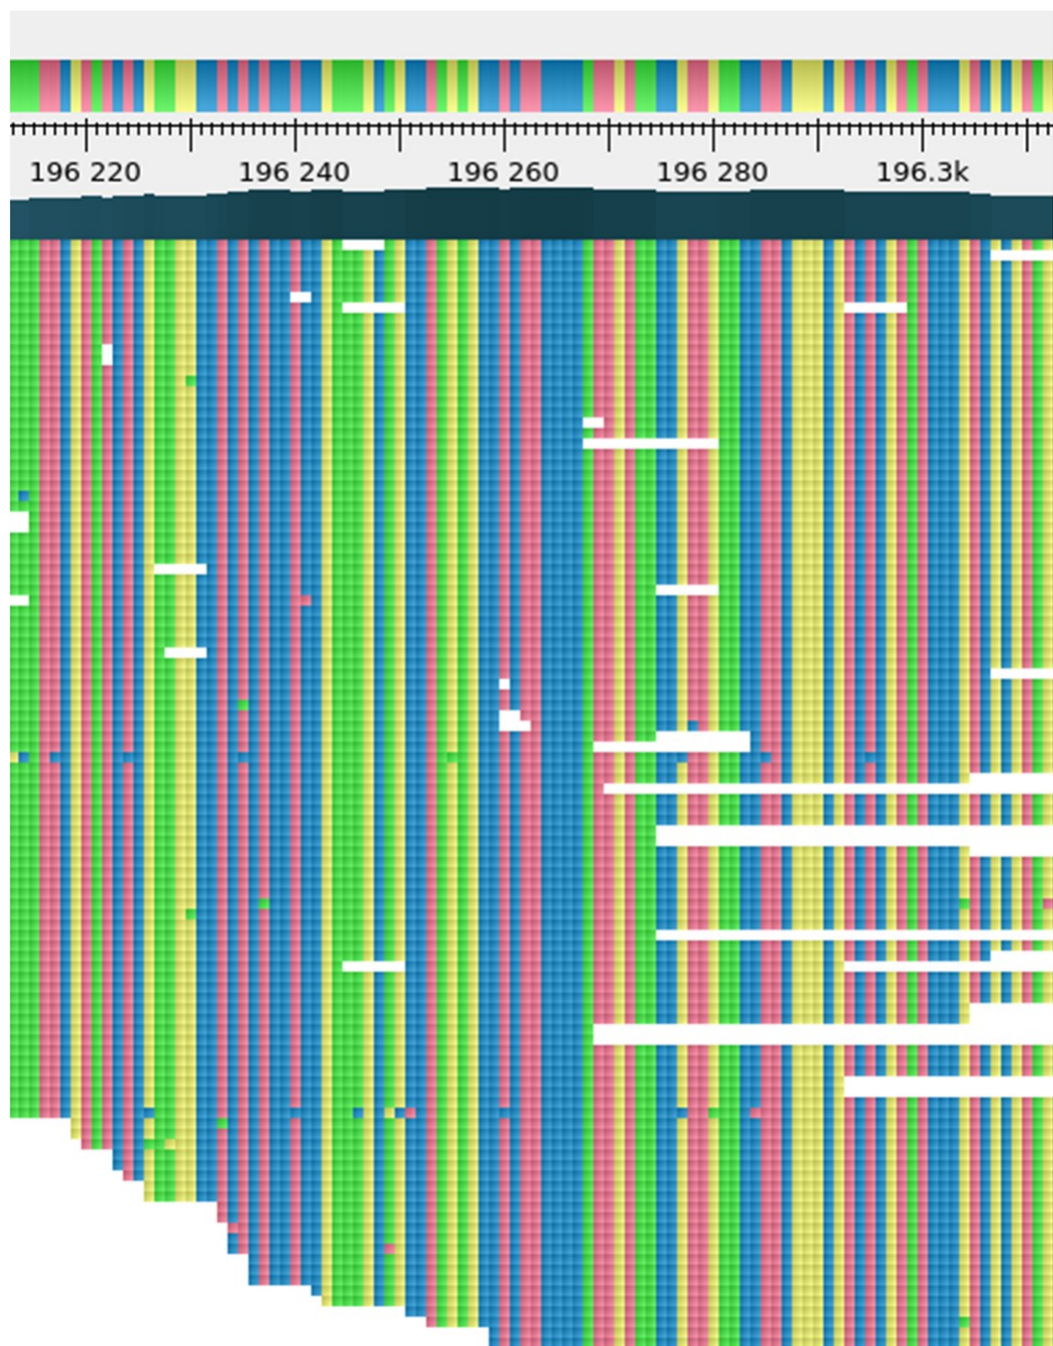**B**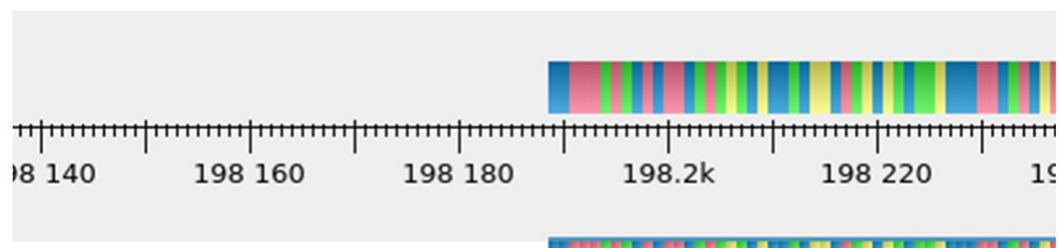

Supplement: Supplemental_Data_S14.pdf [file Supplemental_Data_S14.pdf]
